# Supplementary material for: Neutrophil degranulation, NETosis and platelet degranulation pathway genes are co-induced in whole blood up to six months before tuberculosis diagnosis
Source: PLoS One. 2022 Dec 1;17(12):e0278295. doi: 10.1371/journal.pone.0278295 (PMC9714760; doi:10.1371/journal.pone.0278295)
Supplement: S1 Table — The PET score (low-PET, high-PET as defined in Methods) for the Catalysis study specimens used in the current study. (XLSX) [file pone.0278295.s001.xlsx]

## Sheet: Sheet1
GEO ID	Group	PET Score	Sex
140817_I162_FCC4MT4ACXX_L2_RHUMjlxTAAQPRAAPEI-208	Non-TB_Controls	Baseline	F
140817_I162_FCC4MT4ACXX_L2_RHUMjlxTAAQQRAAPEI-209	Non-TB_Controls	Baseline	M
140809_I266_FCC4N1RACXX_L5_RHUMjlxTAAQRRAAPEI-210	Non-TB_Controls	Baseline	M
140809_I266_FCC4N1RACXX_L5_RHUMjlxTAAQSRAAPEI-211	Non-TB_Controls	Baseline	F
140809_I266_FCC4N1RACXX_L5_RHUMjlxTAAQTRAAPEI-212	Non-TB_Controls	Baseline	F
140809_I266_FCC4N1RACXX_L5_RHUMjlxTAAQURAAPEI-213	Non-TB_Controls	Baseline	M
140817_I162_FCC4MT4ACXX_L4_RHUMjlxTAAQVRAAPEI-214	Non-TB_Controls	Baseline	F
140815_I272_FCC4MUGACXX_L7_RHUMjlxTAAPVRAAPEI-212	Non-TB_Controls	Baseline	F
140812_I232_FCC4MRBACXX_L1_RHUMjlxTAAPZRAAPEI-216	Non-TB_Controls	Baseline	F
140812_I232_FCC4MRBACXX_L3_RHUMjlxTAAQCRAAPEI-220	Non-TB_Controls	Baseline	F
140812_I232_FCC4MRBACXX_L7_RHUMjlxTAAQGRAAPEI-225	Non-TB_Controls	Baseline	F
140812_I232_FCC4MRBACXX_L8_RHUMjlxTAAQJRAAPEI-202	Non-TB_Controls	Baseline	M
140812_I232_FCC4MRBACXX_L8_RHUMjlxTAAQLRAAPEI-204	Non-TB_Controls	Baseline	M
140817_I162_FCC4MT4ACXX_L8_RHUMjlxTAARARAAPEI-220	Non-TB_Controls	Baseline	F
140817_I162_FCC4MT4ACXX_L7_RHUMjlxTAARBRAAPEI-221	Non-TB_Controls	Baseline	M
140817_I162_FCC4MT4ACXX_L7_RHUMjlxTAARCRAAPEI-222	Non-TB_Controls	Baseline	F
140815_I272_FCC4MUGACXX_L1_RHUMjlxTAARDRAAPEI-223	Non-TB_Controls	Baseline	F
140815_I272_FCC4MUGACXX_L1_RHUMjlxTAARERAAPEI-225	Non-TB_Controls	Baseline	F
140815_I272_FCC4MUGACXX_L1_RHUMjlxTAARFRAAPEI-227	Non-TB_Controls	Baseline	F
140815_I272_FCC4MUGACXX_L1_RHUMjlxTAARGRAAPEI-201	Non-TB_Controls	Baseline	M
140815_I272_FCC4MUGACXX_L3_RHUMjlxTAARHRAAPEI-202	Non-TB_Controls	Baseline	M
140724_I269_FCC4N24ACXX_L3_RHUMjlxTAAAJRAAPEI-219	TB_Subjects	High	M
140724_I269_FCC4N24ACXX_L4_RHUMjlxTAAANRAAPEI-223	TB_Subjects	Low	M
140724_I269_FCC4N24ACXX_L7_RHUMjlxTAAARRAAPEI-202	TB_Subjects	Low	M
140724_I269_FCC4N24ACXX_L7_RHUMjlxTAAAVRAAPEI-206	TB_Subjects	High	F
140724_I269_FCC4N24ACXX_L8_RHUMjlxTAAAZRAAPEI-210	TB_Subjects	Low	F
140724_I269_FCC4N6KACXX_L1_RHUMjlxTAABGRAAPEI-218	TB_Subjects	Low	F
140724_I269_FCC4N6KACXX_L2_RHUMjlxTAABKRAAPEI-222	TB_Subjects	Low	M
140724_I269_FCC4N6KACXX_L3_RHUMjlxTAABORAAPEI-201	TB_Subjects	High	M
140724_I269_FCC4N6KACXX_L4_RHUMjlxTAABSRAAPEI-205	TB_Subjects	High	M
140726_I232_FCC4N2GACXX_L2_RHUMjlxTAABVRAAPEI-208	TB_Subjects	Low	M
140726_I232_FCC4N2GACXX_L3_RHUMjlxTAABZRAAPEI-212	TB_Subjects	Low	M
140726_I232_FCC4N2GACXX_L6_RHUMjlxTAACDRAAPEI-216	TB_Subjects	High	M
140726_I162_FCC4NAWACXX_L1_RHUMjlxTAACHRAAPEI-221	TB_Subjects	Low	F
140726_I162_FCC4NAWACXX_L2_RHUMjlxTAACLRAAPEI-227	TB_Subjects	Low	F
140726_I162_FCC4NAWACXX_L4_RHUMjlxTAACPRAAPEI-204	TB_Subjects	Low	M
140726_I162_FCC4NAWACXX_L7_RHUMjlxTAACSRAAPEI-207	TB_Subjects	High	F
140726_I162_FCC4R77ACXX_L1_RHUMjlxTAACWRAAPEI-211	TB_Subjects	High	M
140726_I162_FCC4R77ACXX_L3_RHUMjlxTAADARAAPEI-215	TB_Subjects	Low	M
140812_I270_FCC4N2DACXX_L6_RHUMjlxTAADERBAPEI-220	TB_Subjects	Low	F
140727_I266_FCC4MHMACXX_L1_RHUMjlxTAADIRAAPEI-225	TB_Subjects	High	M
140728_I175_FCC4MJ2ACXX_L8_RHUMjlxTAADMRAAPEI-203	TB_Subjects	Low	M
140727_I266_FCC4MHMACXX_L2_RHUMjlxTAADQRAAPEI-207	TB_Subjects	Low	M
140727_I266_FCC4MHMACXX_L4_RHUMjlxTAADURAAPEI-211	TB_Subjects	Low	M
140727_I266_FCC4MHMACXX_L7_RHUMjlxTAAEBRAAPEI-219	TB_Subjects	Low	F
140728_I175_FCC4MJ2ACXX_L1_RHUMjlxTAAEFRAAPEI-223	TB_Subjects	High	M
140728_I175_FCC4MJ2ACXX_L3_RHUMjlxTAAEJRAAPEI-202	TB_Subjects	Low	M
140728_I175_FCC4MJ2ACXX_L6_RHUMjlxTAAENRAAPEI-206	TB_Subjects	Low	M
140808_I269_FCC4MG0ACXX_L8_RHUMjlxTAAERRAAPEI-210	TB_Subjects	Low	F
140728_I175_FCC4RLLACXX_L2_RHUMjlxTAAEVRAAPEI-214	TB_Subjects	High	M
140728_I175_FCC4RLLACXX_L4_RHUMjlxTAAEZRAAPEI-219	TB_Subjects	Low	M
140728_I175_FCC4RLLACXX_L7_RHUMjlxTAAFDRAAPEI-223	TB_Subjects	High	M
140730_I284_FCC4N7JACXX_L1_RHUMjlxTAAFHRAAPEI-202	TB_Subjects	Low	M
140730_I284_FCC4N7JACXX_L2_RHUMjlxTAAFKRAAPEI-205	TB_Subjects	High	F
140730_I284_FCC4N7JACXX_L3_RHUMjlxTAAFNRAAPEI-208	TB_Subjects	High	M
140804_I270_FCC4RL0ACXX_L8_RHUMjlxTAAFQRABPEI-211	TB_Subjects	Low	M
140812_I270_FCC4N2DACXX_L8_RHUMjlxTAAFURBAPEI-215	TB_Subjects	Low	F
140815_I175_FCC4MVKACXX_L2_RHUMjlxTAAFYRBAPEI-220	TB_Subjects	Low	F
140815_I175_FCC4MVKACXX_L4_RHUMjlxTAAGCRBAPEI-225	TB_Subjects	Low	M
140812_I270_FCC4N2DACXX_L8_RHUMjlxTAAGGRBAPEI-203	TB_Subjects	High	M
140805_I272_FCC4T1PACXX_L6_RHUMjlxTAAGKRABPEI-207	TB_Subjects	Low	M
140805_I272_FCC4T1PACXX_L7_RHUMjlxTAAGORABPEI-211	TB_Subjects	High	M
140805_I272_FCC4MTNACXX_L2_RHUMjlxTAAGSRABPEI-215	TB_Subjects	Low	F
140805_I272_FCC4MTNACXX_L3_RHUMjlxTAAGWRABPEI-220	TB_Subjects	Low	F
140805_I272_FCC4MTNACXX_L6_RHUMjlxTAAHARABPEI-225	TB_Subjects	Low	F
140805_I272_FCC4MTNACXX_L6_RHUMjlxTAAHERABPEI-203	TB_Subjects	Low	F
140805_I272_FCC4MTNACXX_L8_RHUMjlxTAAHIRABPEI-207	TB_Subjects	Low	F
140801_I162_FCC4T6AACXX_L4_RHUMjlxTAAHMRAAPEI-211	TB_Subjects	Low	F
140730_I284_FCC4N7JACXX_L6_RHUMjlxTAAHQRAAPEI-215	TB_Subjects	Low	M
140730_I284_FCC4N7JACXX_L7_RHUMjlxTAAHURAAPEI-220	TB_Subjects	Low	M
140801_I162_FCC4T6AACXX_L8_RHUMjlxTAAHYRAAPEI-225	TB_Subjects	NA	F
140730_I284_FCC4N7JACXX_L8_RHUMjlxTAAIBRAAPEI-202	TB_Subjects	Low	M
140801_I162_FCC4MHCACXX_L1_RHUMjlxTAAIFRAAPEI-206	TB_Subjects	Low	M
140801_I162_FCC4MHCACXX_L2_RHUMjlxTAAIJRAAPEI-210	TB_Subjects	Low	M
140801_I162_FCC4MHCACXX_L3_RHUMjlxTAAINRAAPEI-214	TB_Subjects	Low	M
140801_I162_FCC4MHCACXX_L4_RHUMjlxTAAIQRAAPEI-218	TB_Subjects	Low	M
140801_I162_FCC4MHCACXX_L7_RHUMjlxTAAIXRAAPEI-227	TB_Subjects	High	M
140801_I162_FCC4MHCACXX_L8_RHUMjlxTAAJBRAAPEI-204	TB_Subjects	High	M
140731_I269_FCC4N1JACXX_L1_RHUMjlxTAAJFRAAPEI-208	TB_Subjects	Low	M
140731_I269_FCC4N1JACXX_L6_RHUMjlxTAAJMRAAPEI-215	TB_Subjects	Low	F
140731_I269_FCC4N1JACXX_L8_RHUMjlxTAAJQRAAPEI-220	TB_Subjects	Low	F
140731_I269_FCC4RC2ACXX_L2_RHUMjlxTAAJURAAPEI-225	TB_Subjects	Low	F
140731_I269_FCC4RC2ACXX_L6_RHUMjlxTAAJYRAAPEI-203	TB_Subjects	Low	F
140731_I269_FCC4RC2ACXX_L6_RHUMjlxTAAKARAAPEI-205	TB_Subjects	High	M
140804_I270_FCC4RL0ACXX_L1_RHUMjlxTAAKHRAAPEI-212	TB_Subjects	Low	F
140804_I270_FCC4RL0ACXX_L3_RHUMjlxTAAKLRAAPEI-216	TB_Subjects	High	M
140804_I270_FCC4RL0ACXX_L6_RHUMjlxTAAKPRAAPEI-221	TB_Subjects	Low	M
140805_I284_FCC4MJAACXX_L2_RHUMjlxTAAKTRAAPEI-227	TB_Subjects	Low	M
140805_I284_FCC4MJAACXX_L4_RHUMjlxTAAKXRAAPEI-204	TB_Subjects	Low	M
140805_I284_FCC4MJAACXX_L7_RHUMjlxTAALBRAAPEI-208	TB_Subjects	Low	F
140805_I284_FCC4MV6ACXX_L1_RHUMjlxTAALFRAAPEI-212	TB_Subjects	Low	M
140805_I284_FCC4MV6ACXX_L4_RHUMjlxTAALIRAAPEI-215	TB_Subjects	Low	F
140805_I284_FCC4MV6ACXX_L6_RHUMjlxTAALMRAAPEI-220	TB_Subjects	Low	M
140805_I284_FCC4MV6ACXX_L8_RHUMjlxTAALQRAAPEI-225	TB_Subjects	Low	M
140808_I269_FCC4MG0ACXX_L1_RHUMjlxTAALURAAPEI-203	TB_Subjects	Low	F
140808_I269_FCC4MG0ACXX_L3_RHUMjlxTAALYRAAPEI-207	TB_Subjects	Low	F
140808_I269_FCC4MG0ACXX_L7_RHUMjlxTAAMCRAAPEI-211	TB_Subjects	Low	F
140808_I269_FCC4MTUACXX_L2_RHUMjlxTAAMFRAAPEI-214	TB_Subjects	Low	M
140808_I269_FCC4MTUACXX_L4_RHUMjlxTAAMJRAAPEI-219	TB_Subjects	Low	F
140808_I269_FCC4MTUACXX_L7_RHUMjlxTAAMNRAAPEI-223	TB_Subjects	Low	F
140808_I162_FCC4RDGACXX_L1_RHUMjlxTAAMRRAAPEI-202	TB_Subjects	Low	M
140808_I162_FCC4RDGACXX_L3_RHUMjlxTAAMVRAAPEI-206	TB_Subjects	Low	F
140808_I162_FCC4RDGACXX_L7_RHUMjlxTAAMZRAAPEI-210	TB_Subjects	Low	F
140808_I162_FCC4N81ACXX_L1_RHUMjlxTAANDRAAPEI-214	TB_Subjects	Low	F
140808_I162_FCC4N81ACXX_L2_RHUMjlxTAANHRAAPEI-219	TB_Subjects	High	M
140808_I162_FCC4N81ACXX_L6_RHUMjlxTAANLRAAPEI-223	TB_Subjects	High	M
140809_I266_FCC4N1RACXX_L2_RHUMjlxTAANTRAAPEI-206	TB_Subjects	High	M
140809_I266_FCC4N1RACXX_L4_RHUMjlxTAANXRAAPEI-210	TB_Subjects	Low	F
140809_I266_FCC4N1RACXX_L7_RHUMjlxTAAOBRAAPEI-214	TB_Subjects	Low	F
140809_I266_FCC4MRWACXX_L1_RHUMjlxTAAOFRAAPEI-219	TB_Subjects	High	F
140809_I266_FCC4MRWACXX_L3_RHUMjlxTAAOJRAAPEI-223	TB_Subjects	High	F
