# Supplementary material for: Neutrophil degranulation, NETosis and platelet degranulation pathway genes are co-induced in whole blood up to six months before tuberculosis diagnosis
Source: PLoS One. 2022 Dec 1;17(12):e0278295. doi: 10.1371/journal.pone.0278295 (PMC9714760; doi:10.1371/journal.pone.0278295)
Supplement: S3 Table — The analysis was performed using the topGO R Bioconductor package. The statistical metrics presented for each process include: the total number of genes annotated to the process (Total annotated), the number of genes that were significantly up (N up) -regulated, the percent of total annotated that were up-regulated (% Up) and the number that were expected by chance (Expected). The uncorrected Fisher’s exact test p-value (Pvalue) and overall rank for over-representation of the GO term in the set using both the classic and weight01 (W1) algorithms are presented. (XLSX) [file pone.0278295.s003.xlsx]

## Sheet: Gene Ontology Results
				TB (Catalysis; 9,205 DE genes)									Six months before (5,131 DE genes)									Twelve months before (742 DE genes)									Eighteen months before (278 DE genes )									TB high PET-score vs control (9,211 DE genes)									TB low PET-score vs control (8,496 DE genes)
							Classic			W1 algorithm						Classic			W1 algorithm						Classic			W1 algorithm						Classic			W1 algorithm						Classic			W1 algorithm
GO ID	GO PROCESS NAME	Total annotated		N Up	% Up	Expected	Pvalue	Rank		Pvalue	Rank		N Up	% Up	Expected	Pvalue	Rank		Pvalue	Rank		N Up	% Up	Expected	Pvalue	Rank		Pvalue	Rank		N Up	% Up	Expected	Pvalue	Rank		Pvalue	Rank		N Up	% Up	Expected	Pvalue	Rank		Pvalue	Rank		N Up
GO:0043312	neutrophil degranulation	464		305	65.7328	130.26	< 1e-30	11		< 1e-30	1		222	47.8448	88.31	< 1e-30	19		< 1e-30	1		24	5.17241	15.23	0.01882	652		0.01882	153		15	3.23276	7.9	0.0132	409		0.0132	87		310	66.8103	132.09	< 1e-30	8		< 1e-30	1		297
GO:0098657	import into cell	671		304	45.3055	188.37	1.1e-22	52		1.7e-25	2		193	28.763	127.71	2.4e-10	144		4.2e-09	12		37	5.51416	22.02	0.00137	311		0.002	59		21	3.12966	11.43	0.00524	289		0.00236	37		291	43.3681	191.02	1.9e-17	63		6.2e-20	2		299
GO:0051704	multi-organism process	1842		668	36.2649	517.1	8e-17	74		5e-17	3		501	27.1987	350.58	1.1e-20	61		1e-16	3		131	7.11183	60.45	3.6e-19	18		7.4e-14	3		73	3.96308	31.37	6.7e-13	30		1.8e-06	8		681	36.9707	524.37	7.6e-18	59		3e-15	3		651
GO:0060337	type I interferon signaling pathway	71		51	71.831	19.93	2.2e-14	95		1.8e-14	4		51	71.831	13.51	4.6e-22	54		7.2e-22	2		24	33.8028	2.33	1.6e-18	19		6.6e-17	2		24	33.8028	1.21	2.6e-25	6		1e-25	1		47	66.1972	20.21	4.2e-11	123		2.7e-11	4		50
GO:0051607	defense response to virus	192		100	52.0833	53.9	1.4e-12	113		2.3e-11	5		87	45.3125	36.54	5.5e-17	73		3.3e-13	6		46	23.9583	6.3	3.6e-27	11		1.3e-17	1		29	15.1042	3.27	1.4e-19	14		3.8e-19	2		94	48.9583	54.66	1.2e-09	147		3.8e-08	12		100
GO:0060333	interferon-gamma-mediated signaling pathway	81		57	70.3704	22.74	2.9e-15	83		4.3e-11	6		51	62.963	15.42	3.8e-18	67		4.6e-16	4		22	27.1605	2.66	8.2e-15	31		1.1e-13	4		13	16.0494	1.38	9.6e-10	38		3.2e-08	6		54	66.6667	23.06	9.6e-13	101		2.1e-09	7		54
GO:0002576	platelet degranulation	105		60	57.1429	29.48	3.6e-10	150		3.6e-10	7		45	42.8571	19.98	1.6e-08	195		1.6e-08	15		8	7.61905	3.45	0.02208	712		0.02208	178		3	2.85714	1.79	0.2654	1815		0.2654	778		57	54.2857	29.89	2.3e-08	189		2.3e-08	9		59
GO:0043901	negative regulation of multi-organism process	141		74	52.4823	39.58	7.3e-10	161		7.4e-10	8		64	45.3901	26.84	6.8e-13	99		1.2e-12	8		19	13.4752	4.63	1.7e-07	86		1.7e-07	12		18	12.766	2.4	2.8e-11	34		2.8e-11	4		70	49.6454	40.14	7.7e-08	224		8.2e-08	14		74
GO:0038096	Fc-gamma receptor signaling pathway involved in phagocytosis	72		44	61.1111	20.21	4.7e-09	190		7.7e-10	9		31	43.0556	13.7	2.4e-06	331		1.3e-06	25		7	9.72222	2.36	0.00918	493		0.00918	100		1	1.38889	1.23	0.71062	3165		0.71062	1246		41	56.9444	20.5	3.8e-07	273		9e-08	17		43
GO:0002758	innate immune response-activating signal transduction	199		102	51.2563	55.86	3.1e-12	119		1.1e-09	10		84	42.2111	37.87	3e-14	88		2.6e-12	9		28	14.0704	6.53	7e-11	53		4.7e-11	5		7	3.51759	3.39	0.05402	678		0.22916	710		102	51.2563	56.65	7.7e-12	114		2.9e-10	6		100
GO:0032757	positive regulation of interleukin-8 production	39		29	74.359	10.95	2.5e-09	183		2.5e-09	11		24	61.5385	7.42	5.9e-09	181		5.9e-09	13		7	17.9487	1.28	0.00024	210		0.00024	31		2	5.12821	0.66	0.14224	1183		0.14224	455		27	69.2308	11.1	1.5e-07	244		1.5e-07	21		27
GO:0045087	innate immune response	658		346	52.5836	184.72	< 1e-30	29		6.6e-09	12		284	43.1611	125.23	< 1e-30	12		2.8e-07	21		97	14.7416	21.59	< 1e-30	5		1.6e-06	18		55	8.35866	11.2	1.1e-23	10		1e-05	12		338	51.3678	187.32	< 1e-30	32		8.9e-08	16		337
GO:0002755	MyD88-dependent toll-like receptor signaling pathway	35		26	74.2857	9.83	1.8e-08	216		1.8e-08	13		20	57.1429	6.66	6.1e-07	291		6.1e-07	23		8	22.8571	1.15	1.4e-05	136		1.4e-05	19		1	2.85714	0.6	0.45223	2517		0.45223	1039		26	74.2857	9.96	2.5e-08	191		2.5e-08	10		24
GO:0006954	inflammatory response	557		273	49.0126	156.37	8.5e-27	41		3.3e-08	14		203	36.4452	106.01	4.4e-23	49		1.8e-09	10		54	9.69479	18.28	6.1e-13	41		8.6e-08	10		27	4.8474	9.48	9.1e-07	49		0.00024	19		273	49.0126	158.56	9.2e-26	40		3.3e-08	11		266
GO:0006897	endocytosis	573		275	47.993	160.86	3.5e-25	43		3.6e-08	15		169	29.4939	109.06	4.2e-10	149		0.02124	408		34	5.93368	18.8	0.00062	270		0.00198	58		20	3.4904	9.76	0.00188	201		0.07527	203		261	45.5497	163.12	4.6e-19	54		4.3e-06	29		269
GO:0045071	negative regulation of viral genome replication	47		30	63.8298	13.19	3.4e-07	289		4.8e-08	16		30	63.8298	8.95	1.9e-11	126		6e-13	7		11	23.4043	1.54	2.5e-07	89		2.5e-07	13		15	31.9149	0.8	8.4e-16	19		8.4e-16	3		25	53.1915	13.38	0.00031	663		1.2e-05	35		31
GO:0050832	defense response to fungus	21		18	85.7143	5.9	6e-08	239		6e-08	17		11	52.381	4	0.00062	713		0.00062	99		1	4.7619	0.69	0.50405	3177		0.50405	1546		0	0	0.36	1	6476		1	1375		18	85.7143	5.98	7.6e-08	222		7.6e-08	13		18
GO:0032755	positive regulation of interleukin-6 production	61		37	60.6557	17.12	1e-07	251		1e-07	18		29	47.541	11.61	4e-07	280		4e-07	22		13	21.3115	2	6.7e-08	79		6.7e-08	9		4	6.55738	1.04	0.02005	486		0.02005	107		39	63.9344	17.37	8.5e-09	174		8.5e-09	8		36
GO:0071222	cellular response to lipopolysaccharide	168		89	52.9762	47.16	7.2e-12	123		1.4e-07	19		71	42.2619	31.97	2.7e-12	110		3.1e-06	29		21	12.5	5.51	1.4e-07	85		0.00036	39		10	5.95238	2.86	0.0006	149		0.01344	88		91	54.1667	47.83	1.9e-12	105		8.5e-08	15		91
GO:0007596	blood coagulation	264		132	50	74.11	2.4e-14	97		1.7e-07	20		81	30.6818	50.25	3e-06	340		0.0035	199		24	9.09091	8.66	6.4e-06	126		0.01041	118		8	3.0303	4.5	0.08231	863		0.47012	1051		133	50.3788	75.15	2.9e-14	84		7.9e-07	25		130
GO:0043123	positive regulation of I-kappaB kinase/NF-kappaB signaling	167		78	46.7066	46.88	2e-07	272		2e-07	21		57	34.1317	31.78	2.5e-06	336		2.5e-06	27		14	8.38323	5.48	0.00121	306		0.00121	52		5	2.99401	2.84	0.15638	1272		0.15638	500		78	46.7066	47.54	3.7e-07	272		3.7e-07	24		78
GO:0050830	defense response to Gram-positive bacterium	53		33	62.2642	14.88	2.1e-07	274		2.1e-07	22		22	41.5094	10.09	0.00013	555		0.00013	63		5	9.43396	1.74	0.02938	778		0.02938	205		0	0	0.9	1	6475		1	1376		33	62.2642	15.09	3e-07	263		3e-07	23		32
GO:0032760	positive regulation of tumor necrosis factor production	65		38	58.4615	18.25	2.7e-07	281		2.7e-07	23		31	47.6923	12.37	1.5e-07	252		1.5e-07	20		9	13.8462	2.13	0.00025	218		0.00025	32		1	1.53846	1.11	0.67344	3084		0.67344	1221		39	60	18.5	1.1e-07	232		1.1e-07	19		37
GO:0051092	positive regulation of NF-kappaB transcription factor activity	136		66	48.5294	38.18	3e-07	285		3e-07	24		52	38.2353	25.88	1.2e-07	245		1.2e-07	19		12	8.82353	4.46	0.00172	324		0.00172	55		4	2.94118	2.32	0.20189	1536		0.20189	652		63	46.3235	38.72	6.7e-06	390		6.7e-06	30		64
GO:0061024	membrane organization	686		295	43.0029	192.58	5.5e-18	70		5.4e-07	25		203	29.5918	130.56	4.6e-12	114		0.00467	216		40	5.8309	22.51	0.00029	221		0.99399	2140		20	2.91545	11.68	0.01332	411		1	1377		299	43.586	195.29	2.8e-18	58		6.7e-06	31		284
GO:0002479	antigen processing and presentation of exogenous peptide antigen via MHC class I, TAP-dependent	25		19	76	7.02	8.9e-07	313		8.9e-07	26		17	68	4.76	1.2e-07	243		1.2e-07	18		5	20	0.82	0.00115	297		0.00115	50		1	4	0.43	0.34934	2149		0.34934	913		20	80	7.12	1.3e-07	240		1.3e-07	20		19
GO:0022617	extracellular matrix disassembly	56		31	55.3571	15.72	1.6e-05	443		1.1e-06	27		21	37.5	10.66	0.00094	767		0.00104	122		3	5.35714	1.84	0.27864	2214		0.40242	1355		2	3.57143	0.95	0.24695	1751		1	1378		31	55.3571	15.94	2.1e-05	462		1.5e-06	26		31
GO:0050715	positive regulation of cytokine secretion	96		49	51.0417	26.95	1.6e-06	338		1.6e-06	28		44	45.8333	18.27	1.8e-09	164		1.8e-09	11		19	19.7917	3.15	2.4e-10	57		2.4e-10	6		4	4.16667	1.63	0.08127	795		0.08127	214		52	54.1667	27.33	1e-07	230		1e-07	18		48
GO:0017144	drug metabolic process	623		234	37.5602	174.89	9.1e-08	247		1.7e-06	29		202	32.4238	118.57	2.2e-16	77		1.3e-14	5		25	4.01284	20.45	0.17363	1558		0.13759	487		12	1.92616	10.61	0.37244	2266		0.61929	1185		244	39.1653	177.35	2.4e-09	156		1.2e-10	5		229
GO:0006886	intracellular protein transport	1096		329	30.0182	307.68	0.07235	2287		2.1e-06	30		240	21.8978	208.6	0.00709	1151		0.00235	174		32	2.91971	35.97	0.7833	4068		0.17336	631		13	1.18613	18.66	0.94004	3603		0.90183	1336		328	29.927	312	0.13927	2685		1.9e-07	22		326
GO:0032722	positive regulation of chemokine production	42		27	64.2857	11.79	1.1e-06	323		2.2e-06	31		19	45.2381	7.99	9.4e-05	524		0.00052	87		7	16.6667	1.38	0.00039	239		0.00086	43		4	9.52381	0.72	0.00552	293		0.11756	397		26	61.9048	11.96	6.4e-06	389		7.2e-05	51		25
GO:0045806	negative regulation of endocytosis	44		29	65.9091	12.35	1.9e-07	270		2.4e-06	32		23	52.2727	8.37	7.6e-07	302		1.3e-05	41		2	4.54545	1.44	0.42601	2908		0.42601	1391		2	4.54545	0.75	0.17214	1356		0.48726	1076		27	61.3636	12.53	5.4e-06	375		9.7e-05	57		29
GO:0072672	neutrophil extravasation	10		10	100	2.81	3e-06	367		3e-06	33		4	40	1.9	0.10437	2369		0.10437	985		0	0	0.33	1	7507		1	2491		0	0	0.17	1	7310		1	1379		8	80	2.85	0.00108	823		0.00108	142		10
GO:0042742	defense response to bacterium	142		83	58.4507	39.86	2.7e-14	98		4.2e-06	34		56	39.4366	27.03	1.1e-08	191		7.4e-06	34		10	7.04225	4.66	0.01858	649		0.53642	1622		3	2.11268	2.42	0.43649	2479		0.65077	1212		83	58.4507	40.42	6.4e-14	87		6.9e-05	50		82
GO:0008360	regulation of cell shape	128		60	46.875	35.93	4.3e-06	381		4.3e-06	35		30	23.4375	24.36	0.12378	2492		0.12378	1023		6	4.6875	4.2	0.24406	2045		0.24406	932		2	1.5625	2.18	0.64435	3035		0.64435	1206		48	37.5	36.44	0.01642	1444		0.01642	379		59
GO:0051818	disruption of cells of other organism involved in symbiotic interaction	12		11	91.6667	3.37	7.5e-06	408		7.5e-06	36		5	41.6667	2.28	0.06031	2013		0.06031	707		1	8.33333	0.39	0.33007	2485		0.33007	1174		0	0	0.2	1	6612		1	1380		11	91.6667	3.42	8.7e-06	407		8.7e-06	34		11
GO:0043154	negative regulation of cysteine-type endopeptidase activity involved in apoptotic process	74		38	51.3514	20.77	1.9e-05	452		8.2e-06	37		25	33.7838	14.08	0.00185	890		0.00397	212		6	8.10811	2.43	0.03433	828		0.03433	233		2	2.7027	1.26	0.36001	2188		0.36001	930		37	50	21.07	7.1e-05	550		9.9e-05	58		36
GO:0050829	defense response to Gram-negative bacterium	43		26	60.4651	12.07	8.9e-06	417		8.9e-06	38		11	25.5814	8.18	0.1814	2853		0.1814	1308		3	6.97674	1.41	0.16651	1535		0.16651	620		0	0	0.73	1	6474		1	1381		26	60.4651	12.24	1.2e-05	420		1.2e-05	36		26
GO:0042108	positive regulation of cytokine biosynthetic process	49		28	57.1429	13.76	1.8e-05	451		1.8e-05	39		23	46.9388	9.33	8.2e-06	384		8.2e-06	35		8	16.3265	1.61	0.00017	201		0.00017	28		2	4.08163	0.83	0.20296	1540		0.20296	654		27	55.102	13.95	8e-05	559		8e-05	54		26
GO:0006914	autophagy	439		195	44.4191	123.24	7.6e-14	100		2.1e-05	40		142	32.3462	83.55	9.4e-12	122		0.00219	161		18	4.10023	14.41	0.19611	1725		0.78175	1959		6	1.36674	7.48	0.76289	3258		1	1382		201	45.7859	124.97	3.4e-15	76		5.9e-05	48		192
GO:0048208	COPII vesicle coating	62		33	53.2258	17.41	2.5e-05	469		2.5e-05	41		20	32.2581	11.8	0.00898	1246		0.00898	299		7	11.2903	2.03	0.00405	395		0.00405	75		2	3.22581	1.06	0.28493	1909		0.28493	820		33	53.2258	17.65	3.5e-05	494		3.4e-05	40		32
GO:0070498	interleukin-1-mediated signaling pathway	52		30	57.6923	14.6	7.1e-06	402		2.7e-05	42		20	38.4615	9.9	0.00085	746		0.00253	180		5	9.61538	1.71	0.02731	768		0.05899	294		2	3.84615	0.89	0.22173	1626		0.53748	1118		28	53.8462	14.8	0.0001	572		0.00012	60		27
GO:0061844	antimicrobial humoral immune response mediated by antimicrobial peptide	38		23	60.5263	10.67	2.9e-05	480		2.9e-05	43		14	36.8421	7.23	0.00767	1174		0.00767	269		0	0	1.25	1	7235		1	2211		3	7.89474	0.65	0.02653	522		0.02653	118		22	57.8947	10.82	0.00014	597		0.00014	66		23
GO:0019221	cytokine-mediated signaling pathway	593		275	46.3744	166.47	2.2e-22	53		3.5e-05	44		234	39.4604	112.86	< 1e-30	33		0.00019	66		59	9.94941	19.46	1.4e-14	35		0.52131	1584		45	7.58853	10.1	1.1e-17	15		0.80439	1292		268	45.1939	168.81	5.5e-19	56		0.00012	61		269
GO:0034162	toll-like receptor 9 signaling pathway	20		13	65	5.61	0.00063	768		3.6e-05	45		9	45	3.81	0.00711	1152		0.00088	111		6	30	0.66	3.2e-05	147		3.8e-05	21		1	5	0.34	0.29089	1936		1	1383		14	70	5.69	0.00014	604		2.7e-06	28		13
GO:0002227	innate immune response in mucosa	13		11	84.6154	3.65	3.6e-05	496		3.6e-05	46		4	30.7692	2.47	0.22346	3026		0.22346	1563		0	0	0.43	1	4874		1	2789		0	0	0.22	1	3946		1	1384		11	84.6154	3.7	4.2e-05	507		4.2e-05	42		11
GO:0045056	transcytosis	13		11	84.6154	3.65	3.6e-05	497		3.6e-05	47		6	46.1538	2.47	0.0238	1541		0.0238	438		0	0	0.43	1	6539		1	2260		0	0	0.22	1	6076		1	1385		9	69.2308	3.7	0.00269	954		0.00269	181		11
GO:0032930	positive regulation of superoxide anion generation	13		11	84.6154	3.65	3.6e-05	498		3.6e-05	48		9	69.2308	2.47	0.00011	538		0.00011	60		1	7.69231	0.43	0.35208	2600		0.35208	1233		0	0	0.22	1	5421		1	1386		11	84.6154	3.7	4.2e-05	508		4.2e-05	43		10
GO:0032611	interleukin-1 beta production	61		40	65.5738	17.12	1.2e-09	165		3.7e-05	49		34	55.7377	11.61	1.8e-10	142		0.00089	112		12	19.6721	2	5.4e-07	102		0.00165	54		3	4.91803	1.04	0.08553	871		1	1387		43	70.4918	17.37	1.1e-11	117		4.1e-05	41		39
GO:0000187	activation of MAPK activity	124		56	45.1613	34.81	3.4e-05	492		3.7e-05	50		37	29.8387	23.6	0.00239	935		0.00158	144		10	8.06452	4.07	0.00764	465		0.07031	337		0	0	2.11	1	3765		1	1388		54	43.5484	35.3	0.00022	636		0.00013	63		55
GO:0071223	cellular response to lipoteichoic acid	8		8	100	2.25	3.8e-05	506		3.8e-05	51		6	75	1.52	0.00093	760		0.00093	117		2	25	0.26	0.02639	747		0.02639	191		0	0	0.14	1	7109		1	1389		7	87.5	2.28	0.00091	796		0.00091	128		7
GO:0010951	negative regulation of endopeptidase activity	158		80	50.6329	44.35	1.4e-09	171		4.1e-05	52		50	31.6456	30.07	9.5e-05	527		0.00959	308		12	7.59494	5.19	0.00588	427		0.1138	436		6	3.79747	2.69	0.05326	672		0.04529	161		80	50.6329	44.98	2.9e-09	159		5.8e-05	47		77
GO:0019731	antibacterial humoral response	23		16	69.5652	6.46	4.2e-05	514		4.2e-05	53		5	21.7391	4.38	0.45193	4227		0.45193	2614		0	0	0.75	1	5672		1	3355		0	0	0.39	1	5007		1	1390		16	69.5652	6.55	5.1e-05	518		5.1e-05	44		16
GO:2001238	positive regulation of extrinsic apoptotic signaling pathway	45		24	53.3333	12.63	0.00031	662		4.5e-05	54		22	48.8889	8.56	5.6e-06	367		1.8e-05	42		5	11.1111	1.48	0.01545	607		0.0795	359		4	8.88889	0.77	0.00706	322		0.01527	96		22	48.8889	12.81	0.00291	984		7.9e-06	32		23
GO:0072512	trivalent inorganic cation transport	32		20	62.5	8.98	5e-05	531		5e-05	55		10	31.25	6.09	0.06798	2069		0.06798	733		0	0	1.05	1	7496		1	2372		0	0	0.54	1	7290		1	1391		19	59.375	9.11	0.00025	646		0.00025	74		20
GO:0030574	collagen catabolic process	30		19	63.3333	8.42	5.9e-05	544		5.9e-05	56		13	43.3333	5.71	0.00193	900		0.00193	157		3	10	0.98	0.07415	1062		0.07415	342		3	10	0.51	0.01409	419		0.01409	90		19	63.3333	8.54	7.3e-05	551		7.3e-05	52		20
GO:0006952	defense response	1182		572	48.3926	331.82	< 1e-30	22		6e-05	57		446	37.7327	224.96	< 1e-30	4		0.00334	198		128	10.8291	38.79	< 1e-30	6		0.6671	1801		76	6.42978	20.13	7.1e-26	5		0.28481	819		566	47.8849	336.49	< 1e-30	23		7.8e-05	53		557
GO:0032720	negative regulation of tumor necrosis factor production	42		24	57.1429	11.79	7.2e-05	554		7.2e-05	58		20	47.619	7.99	2.4e-05	429		2.4e-05	45		3	7.14286	1.38	0.1585	1513		0.1585	611		2	4.7619	0.72	0.16005	1332		0.16005	545		25	59.5238	11.96	2.5e-05	475		2.5e-05	39		23
GO:0002720	positive regulation of cytokine production involved in immune response	45		27	60	12.63	7.4e-06	406		7.9e-05	59		22	48.8889	8.56	5.6e-06	368		0.00061	97		5	11.1111	1.48	0.01545	606		0.04029	240		2	4.44444	0.77	0.17825	1424		1	1392		26	57.7778	12.81	3.6e-05	498		8.9e-05	55		27
GO:0050729	positive regulation of inflammatory response	101		56	55.4455	28.35	6.3e-09	199		9e-05	60		41	40.5941	19.22	4.1e-07	282		0.00179	156		7	6.93069	3.31	0.04826	918		0.11195	435		4	3.9604	1.72	0.09373	900		0.19645	627		55	54.4554	28.75	3.5e-08	196		0.00034	83		53
GO:0034341	response to interferon-gamma	163		99	60.7362	45.76	2.2e-18	67		0.00011	61		92	56.4417	31.02	1.4e-26	40		1.1e-06	24		35	21.4724	5.35	3.1e-19	17		0.00192	57		22	13.4969	2.78	4.9e-14	25		7e-06	10		94	57.6687	46.4	4.6e-15	78		0.00076	117		93
GO:1900017	positive regulation of cytokine production involved in inflammatory response	12		10	83.3333	3.37	0.00011	590		0.00011	62		9	75	2.28	4.1e-05	455		4.1e-05	46		1	8.33333	0.39	0.33007	2465		0.33007	1168		0	0	0.2	1	7644		1	1393		10	83.3333	3.42	0.00013	587		0.00013	64		10
GO:0036109	alpha-linolenic acid metabolic process	12		10	83.3333	3.37	0.00011	591		0.00011	63		7	58.3333	2.28	0.00289	961		0.00289	189		0	0	0.39	1	6259		1	2183		0	0	0.2	1	5731		1	1394		9	75	3.42	0.00111	830		0.00111	146		11
GO:0033572	transferrin transport	31		19	61.2903	8.7	0.00011	593		0.00011	64		10	32.2581	5.9	0.05592	1982		0.05592	694		0	0	1.02	1	6074		1	2366		0	0	0.53	1	5482		1	1395		18	58.0645	8.82	0.00053	724		0.00053	99		19
GO:0045824	negative regulation of innate immune response	40		29	72.5	11.23	6.8e-09	200		0.00013	65		23	57.5	7.61	7.4e-08	227		0.00494	226		10	25	1.31	4.6e-07	98		3.3e-07	14		5	12.5	0.68	0.00055	145		0.05652	183		28	70	11.39	6e-08	215		0.00094	133		28
GO:0007229	integrin-mediated signaling pathway	86		42	48.8372	24.14	3.4e-05	493		0.00013	66		28	32.5581	16.37	0.00192	898		0.00861	292		4	4.65116	2.82	0.31218	2434		0.43895	1426		0	0	1.46	1	4446		1	1396		40	46.5116	24.48	0.00027	650		0.00099	135		41
GO:0070527	platelet aggregation	49		27	55.102	13.76	6.2e-05	546		0.00013	67		16	32.6531	9.33	0.01626	1450		0.01205	321		4	8.16327	1.61	0.07631	1098		0.33018	1207		1	2.04082	0.83	0.56964	2839		0.56964	1136		28	57.1429	13.95	2.4e-05	473		0.00017	69		27
GO:0035771	interleukin-4-mediated signaling pathway	7		7	100	1.97	0.00014	608		0.00014	68		5	71.4286	1.33	0.00371	1010		0.00371	204		1	14.2857	0.23	0.20835	1810		0.20835	775		1	14.2857	0.12	0.1133	1020		0.1133	360		7	100	1.99	0.00015	611		0.00015	68		6
GO:0006898	receptor-mediated endocytosis	224		105	46.875	62.88	1.3e-09	169		0.00014	69		61	27.2321	42.63	0.0016	860		0.01285	325		9	4.01786	7.35	0.31537	2441		0.10944	433		7	3.125	3.81	0.08865	883		0.03899	151		101	45.0893	63.77	7e-08	220		1.8e-05	38		98
GO:0043407	negative regulation of MAP kinase activity	61		27	44.2623	17.12	0.00489	1127		0.00016	70		15	24.5902	11.61	0.17113	2787		0.02202	413		6	9.83607	2	0.01462	580		0.21939	847		2	3.27869	1.04	0.27861	1902		0.47887	1062		27	44.2623	17.37	0.00601	1134		0.00079	118		27
GO:0031623	receptor internalization	78		39	50	21.9	3.3e-05	488		0.0002	71		23	29.4872	14.85	0.01685	1456		0.00763	268		1	1.28205	2.56	0.92651	4466		1	2210		1	1.28205	1.33	0.73911	3217		0.73911	1260		36	46.1538	22.2	0.00065	746		0.00025	75		35
GO:0032731	positive regulation of interleukin-1 beta production	32		19	59.375	8.98	0.0002	633		0.0002	72		16	50	6.09	7.6e-05	508		7.6e-05	57		7	21.875	1.05	6.4e-05	165		6.4e-05	22		2	6.25	0.54	0.10267	980		0.10267	340		22	68.75	9.11	2.6e-06	337		2.6e-06	27		18
GO:0045926	negative regulation of growth	197		66	33.5025	55.3	0.05342	2083		0.00022	73		49	24.8731	37.49	0.02473	1568		0.12927	1031		9	4.56853	6.47	0.1998	1744		0.17263	626		5	2.53807	3.35	0.24541	1746		0.32528	880		70	35.533	56.08	0.01783	1477		0.00026	76		61
GO:0010499	proteasomal ubiquitin-independent protein catabolic process	23		15	65.2174	6.46	0.00023	642		0.00023	74		15	65.2174	4.38	1.6e-06	318		1.6e-06	26		1	4.34783	0.75	0.53612	3304		0.53612	1607		0	0	0.39	1	4654		1	1397		17	73.913	6.55	8.1e-06	403		8.1e-06	33		14
GO:0021762	substantia nigra development	37		21	56.7568	10.39	0.00023	643		0.00023	75		16	43.2432	7.04	0.00062	712		0.00062	98		3	8.10811	1.21	0.12044	1315		0.12044	444		1	2.7027	0.63	0.47078	2563		0.47078	1053		21	56.7568	10.53	0.00029	652		0.00029	79		20
GO:0032496	response to lipopolysaccharide	261		131	50.1916	73.27	2e-14	93		0.00024	76		98	37.5479	49.67	1.3e-12	106		0.01023	313		29	11.1111	8.57	8.9e-09	69		0.00912	99		14	5.36398	4.44	0.00015	103		0.06738	197		131	50.1916	74.3	6.4e-14	86		0.00144	152		130
GO:0002532	production of molecular mediator involved in inflammatory response	49		34	69.3878	13.76	2.2e-09	180		0.00025	77		26	53.0612	9.33	9.8e-08	234		0.01547	372		5	10.2041	1.61	0.02169	705		0.03296	222		1	2.04082	0.83	0.56964	2834		0.56964	1137		34	69.3878	13.95	3.2e-09	161		0.00028	78		34
GO:0006911	phagocytosis, engulfment	41		25	60.9756	11.51	1.1e-05	427		0.00026	78		18	43.9024	7.8	0.00023	605		0.00272	182		6	14.6341	1.35	0.00205	344		0.01239	121		1	2.43902	0.7	0.50602	2676		0.50602	1090		23	56.0976	11.67	0.00019	627		0.00141	151		26
GO:0006098	pentose-phosphate shunt	14		10	71.4286	3.93	0.00094	809		0.00026	79		8	57.1429	2.66	0.0017	869		0.00233	166		0	0	0.46	1	5027		1	2178		0	0	0.24	1	4174		1	1398		11	78.5714	3.99	0.00015	607		1.2e-05	37		10
GO:0120162	positive regulation of cold-induced thermogenesis	76		36	47.3684	21.34	0.00026	648		0.00026	80		15	19.7368	14.46	0.48385	4442		0.48385	2909		2	2.63158	2.49	0.71751	3872		0.71751	1875		4	5.26316	1.29	0.04057	616		0.04057	153		38	50	21.64	5.7e-05	530		5.7e-05	46		35
GO:0071260	cellular response to mechanical stimulus	68		33	48.5294	19.09	0.00027	650		0.00027	81		24	35.2941	12.94	0.00114	794		0.00114	123		7	10.2941	2.23	0.00675	449		0.00675	88		1	1.47059	1.16	0.68992	3116		0.68992	1233		34	50	19.36	0.00014	601		0.00014	67		33
GO:0043903	regulation of symbiosis, encompassing mutualism through parasitism	181		87	48.0663	50.81	7.4e-09	203		0.0003	82		73	40.3315	34.45	2e-11	127		0.08188	789		18	9.94475	5.94	2.8e-05	145		0.42398	1390		22	12.1547	3.08	4.3e-13	28		1	1399		86	47.5138	51.53	3.6e-08	198		0.00035	84		85
GO:1901224	positive regulation of NIK/NF-kappaB signaling	62		29	46.7742	17.41	0.00129	856		0.00031	83		19	30.6452	11.8	0.01887	1473		0.00256	181		4	6.45161	2.03	0.14575	1389		0.14575	495		3	4.83871	1.06	0.0888	885		0.0888	274		25	40.3226	17.65	0.02944	1758		0.00712	269		28
GO:0043902	positive regulation of multi-organism process	141		57	40.4255	39.58	0.001	824		0.00032	84		45	31.9149	26.84	0.00017	579		6.4e-05	55		11	7.80142	4.63	0.00674	448		0.01149	120		6	4.25532	2.4	0.03355	559		0.03355	129		59	41.844	40.14	0.00043	694		0.00012	62		55
GO:0034142	toll-like receptor 4 signaling pathway	28		19	67.8571	7.86	1.4e-05	436		0.00033	85		13	46.4286	5.33	0.00088	754		0.00016	64		6	21.4286	0.92	0.00025	214		0.04787	264		1	3.57143	0.48	0.38208	2293		1	1400		19	67.8571	7.97	1.7e-05	444		0.00037	86		18
GO:0042776	mitochondrial ATP synthesis coupled proton transport	17		12	70.5882	4.77	0.00033	671		0.00033	86		10	58.8235	3.24	0.00032	643		0.00032	80		0	0	0.56	1	6392		1	2164		1	5.88235	0.29	0.25334	1760		0.25334	749		12	70.5882	4.84	0.00038	681		0.00038	88		9
GO:0042533	tumor necrosis factor biosynthetic process	17		12	70.5882	4.77	0.00033	672		0.00033	87		9	52.9412	3.24	0.00178	883		0.00178	155		3	17.6471	0.56	0.01694	624		0.01694	148		0	0	0.29	1	5867		1	1401		12	70.5882	4.84	0.00038	682		0.00038	89		12
GO:0010867	positive regulation of triglyceride biosynthetic process	11		9	81.8182	3.09	0.00033	673		0.00033	88		7	63.6364	2.09	0.00144	836		0.00144	139		0	0	0.36	1	5441		1	2174		1	9.09091	0.19	0.17221	1363		0.17221	560		8	72.7273	3.13	0.00297	990		0.00297	195		7
GO:0019682	glyceraldehyde-3-phosphate metabolic process	20		12	60	5.61	0.00278	1011		0.00035	89		10	50	3.81	0.00174	879		0.00053	88		0	0	0.66	1	5668		1	2166		0	0	0.34	1	5002		1	1402		13	65	5.69	0.00073	763		5.1e-05	45		12
GO:0045730	respiratory burst	29		19	65.5172	8.14	2.9e-05	482		0.00035	90		14	48.2759	5.52	0.00034	652		9.9e-06	39		2	6.89655	0.95	0.24611	2048		0.35176	1230		0	0	0.49	1	6149		1	1403		21	72.4138	8.26	1.2e-06	304		0.0004	93		19
GO:0043304	regulation of mast cell degranulation	25		17	68	7.02	3.8e-05	502		0.00035	91		12	48	4.76	0.00096	771		0.0052	231		1	4	0.82	0.56612	3389		0.56612	1665		1	4	0.43	0.34934	2139		0.34934	914		17	68	7.12	4.7e-05	512		0.0004	94		17
GO:0045591	positive regulation of regulatory T cell differentiation	13		10	76.9231	3.65	0.00036	680		0.00036	92		7	53.8462	2.47	0.00523	1083		0.00523	232		3	23.0769	0.43	0.00785	474		0.00785	93		3	23.0769	0.22	0.00123	178		0.00123	26		10	76.9231	3.7	0.00041	689		0.00041	96		10
GO:0051770	positive regulation of nitric-oxide synthase biosynthetic process	13		10	76.9231	3.65	0.00036	681		0.00036	93		7	53.8462	2.47	0.00523	1085		0.00523	234		4	30.7692	0.43	0.00065	272		0.00065	42		1	7.69231	0.22	0.20018	1520		0.20018	631		9	69.2308	3.7	0.00269	955		0.00269	182		10
GO:0032481	positive regulation of type I interferon production	62		33	53.2258	17.41	2.5e-05	470		0.00036	94		22	35.4839	11.8	0.00167	861		0.10349	964		14	22.5806	2.03	9.4e-09	70		0.00897	97		4	6.45161	1.06	0.02115	492		0.07103	199		32	51.6129	17.65	0.0001	571		0.01604	373		34
GO:0030593	neutrophil chemotaxis	72		37	51.3889	20.21	2.4e-05	466		0.00036	95		30	41.6667	13.7	7.6e-06	382		2e-05	43		2	2.77778	2.36	0.68927	3778		0.68927	1836		7	9.72222	1.23	0.00022	112		0.00125	30		38	52.7778	20.5	1.2e-05	421		0.00046	98		36
GO:0016241	regulation of macroautophagy	153		72	47.0588	42.95	4e-07	292		0.00038	96		48	31.3725	29.12	0.00016	577		0.00089	113		8	5.22876	5.02	0.13082	1346		1	2167		2	1.30719	2.61	0.73811	3215		1	1404		73	47.7124	43.56	3.1e-07	264		0.00018	70		67
GO:1903955	positive regulation of protein targeting to mitochondrion	31		18	58.0645	8.7	0.00044	716		0.00044	97		13	41.9355	5.9	0.00276	948		0.00276	183		3	9.67742	1.02	0.08018	1110		0.08018	360		NA	NA	NA	NA	NA		NA	7749		17	54.8387	8.82	0.00181	888		0.00181	155		18
GO:1902042	negative regulation of extrinsic apoptotic signaling pathway via death domain receptors	31		18	58.0645	8.7	0.00044	717		0.00044	98		11	35.4839	5.9	0.02316	1531		0.02316	417		1	3.22581	1.02	0.645	3652		0.645	1779		1	3.22581	0.53	0.41318	2385		0.41318	995		18	58.0645	8.82	0.00053	723		0.00053	100		18
GO:0002230	positive regulation of defense response to virus by host	24		15	62.5	6.74	0.00045	718		0.00045	99		14	58.3333	4.57	2.2e-05	425		2.2e-05	44		8	33.3333	0.79	5.8e-07	103		5.8e-07	16		1	4.16667	0.41	0.33805	2096		0.33805	898		15	62.5	6.83	0.00053	714		0.00053	101		15
GO:0035666	TRIF-dependent toll-like receptor signaling pathway	24		15	62.5	6.74	0.00045	719		0.00045	100		12	50	4.57	0.00061	706		0.00061	94		1	4.16667	0.79	0.55137	3353		0.55137	1641		1	4.16667	0.41	0.33805	2102		0.33805	899		16	66.6667	6.83	0.00011	578		0.00011	59		14
GO:0032715	negative regulation of interleukin-6 production	36		20	55.5556	10.11	0.00048	727		0.00048	101		12	33.3333	6.85	0.02981	1685		0.02981	511		2	5.55556	1.18	0.3318	2529		0.3318	1210		0	0	0.61	1	5392		1	1405		18	50	10.25	0.00507	1091		0.00507	226		20
GO:0038066	p38MAPK cascade	39		21	53.8462	10.95	0.00061	761		0.00048	102		13	33.3333	7.42	0.02427	1557		0.00125	126		2	5.12821	1.28	0.36781	2670		1	2171		2	5.12821	0.66	0.14224	1182		0.09775	285		20	51.2821	11.1	0.00217	918		0.00053	102		20
GO:0046477	glycosylceramide catabolic process	6		6	100	1.68	0.00049	732		0.00049	103		4	66.6667	1.14	0.01414	1361		0.01414	338		1	16.6667	0.2	0.18147	1613		0.18147	654		0	0	0.1	1	6273		1	1406		6	100	1.71	0.00053	715		0.00053	103		6
GO:0071221	cellular response to bacterial lipopeptide	6		6	100	1.68	0.00049	733		0.00049	104		5	83.3333	1.14	0.00126	809		0.00126	127		2	33.3333	0.2	0.01476	589		0.01476	133		0	0	0.1	1	7108		1	1407		6	100	1.71	0.00053	716		0.00053	104		5
GO:0060336	negative regulation of interferon-gamma-mediated signaling pathway	6		6	100	1.68	0.00049	734		0.00049	105		5	83.3333	1.14	0.00126	810		0.00126	128		1	16.6667	0.2	0.18147	1640		0.18147	652		2	33.3333	0.1	0.00414	271		0.00414	46		6	100	1.71	0.00053	717		0.00053	105		5
GO:2001186	negative regulation of CD8-positive, alpha-beta T cell activation	6		6	100	1.68	0.00049	735		0.00049	106		5	83.3333	1.14	0.00126	815		0.00126	133		2	33.3333	0.2	0.01476	581		0.01476	136		1	16.6667	0.1	0.09793	947		0.09793	286		6	100	1.71	0.00053	719		0.00053	106		6
GO:0030091	protein repair	6		6	100	1.68	0.00049	736		0.00049	107		4	66.6667	1.14	0.01414	1377		0.01414	354		0	0	0.2	1	5755		1	2233		1	16.6667	0.1	0.09793	943		0.09793	287		5	83.3333	1.71	0.00854	1267		0.00854	312		6
GO:0050900	leukocyte migration	344		156	45.3488	96.57	3.4e-12	120		0.0005	108		110	31.9767	65.47	4.4e-09	178		0.01918	399		16	4.65116	11.29	0.10224	1226		0.1867	747		12	3.48837	5.86	0.01489	434		1	1408		154	44.7674	97.93	5.2e-11	125		0.0007	113		152
GO:0007166	cell surface receptor signaling pathway	2244		815	36.3191	629.95	4.3e-21	59		0.00053	109		576	25.6684	427.09	7.8e-18	68		0.0003	79		120	5.34759	73.64	9.6e-09	71		0.24736	935		73	3.25312	38.21	7.6e-09	43		0.62247	1186		789	35.1604	638.81	1.7e-14	82		0.00188	168		799
GO:0090200	positive regulation of release of cytochrome c from mitochondria	29		17	58.6207	8.14	0.00055	749		0.00055	110		14	48.2759	5.52	0.00034	653		0.00034	82		1	3.44828	0.95	0.62044	3576		0.62044	1745		2	6.89655	0.49	0.08683	877		0.08683	271		17	58.6207	8.26	0.00065	747		0.00065	109		16
GO:0036258	multivesicular body assembly	29		17	58.6207	8.14	0.00055	750		0.00055	111		14	48.2759	5.52	0.00034	654		0.00034	83		0	0	0.95	1	6266		1	2165		0	0	0.49	1	5745		1	1409		17	58.6207	8.26	0.00065	748		0.00065	110		16
GO:0016197	endosomal transport	195		82	42.0513	54.74	1.7e-05	449		0.00055	112		59	30.2564	37.11	9.9e-05	530		0.00061	96		8	4.10256	6.4	0.3104	2431		0.76855	1943		3	1.53846	3.32	0.64891	3041		0.8149	1296		81	41.5385	55.51	5.5e-05	528		0.00069	112		82
GO:0007040	lysosome organization	56		33	58.9286	15.72	1.3e-06	331		0.00058	113		23	41.0714	10.66	0.00011	540		0.00231	164		4	7.14286	1.84	0.1112	1271		0.30621	1099		3	5.35714	0.95	0.06998	753		0.17723	589		30	53.5714	15.94	6.7e-05	546		0.00626	247		35
GO:0050710	negative regulation of cytokine secretion	52		26	50	14.6	0.00065	772		0.00065	114		19	36.5385	9.9	0.0023	920		0.0023	163		6	11.5385	1.71	0.00685	454		0.00685	89		1	1.92308	0.89	0.59133	2892		0.59133	1159		26	50	14.8	0.00082	778		0.00082	119		26
GO:0032480	negative regulation of type I interferon production	43		24	55.814	12.07	0.00012	598		0.00067	115		20	46.5116	8.18	3.8e-05	452		0.00013	62		7	16.2791	1.41	0.00045	251		0.00135	53		5	11.6279	0.73	0.00078	157		0.00078	22		21	48.8372	12.24	0.00366	1034		0.00864	326		24
GO:0000902	cell morphogenesis	771		249	32.2957	216.44	0.00439	1100		0.00068	116		132	17.1206	146.74	0.92673	6930		0.02128	409		24	3.11284	25.3	0.63708	3635		0.16091	613		13	1.68612	13.13	0.55578	2812		1	1410		235	30.4799	219.48	0.10875	2534		0.0003	80		239
GO:0002250	adaptive immune response	334		154	46.1078	93.76	9.3e-13	110		0.0007	117		114	34.1317	63.57	2.7e-11	130		0.00046	86		34	10.1796	10.96	4.4e-09	68		0.0012	51		18	5.38922	5.69	1.6e-05	65		0.07977	209		150	44.9102	95.08	6.9e-11	128		0.001	136		152
GO:0007259	JAK-STAT cascade	102		45	44.1176	28.63	0.00037	686		0.00072	118		32	31.3725	19.41	0.00189	892		0.00059	90		12	11.7647	3.35	0.00012	189		0.00232	60		6	5.88235	1.74	0.0079	334		0.03613	138		46	45.098	29.04	0.00024	643		0.00082	120		42
GO:0009168	purine ribonucleoside monophosphate biosynthetic process	125		51	40.8	35.09	0.00141	868		0.00072	119		45	36	23.79	5.7e-06	370		3.2e-06	30		5	4	4.1	0.3915	2773		0.70264	1859		1	0.8	2.13	0.88436	3492		0.88436	1325		54	43.2	35.58	0.00029	653		0.00013	65		48
GO:0043277	apoptotic cell clearance	38		21	55.2632	10.67	0.00038	696		0.00073	120		16	42.1053	7.23	0.00088	753		0.00294	191		5	13.1579	1.25	0.00765	468		0.563	1660		6	15.7895	0.65	4e-05	78		0.00821	74		20	52.6316	10.82	0.00144	861		0.00084	121		21
GO:0010955	negative regulation of protein processing	32		17	53.125	8.98	0.00241	960		0.00074	121		14	43.75	6.09	0.00117	796		0.00295	192		3	9.375	1.05	0.08642	1154		0.08642	373		1	3.125	0.54	0.42319	2421		0.42319	1008		18	56.25	9.11	0.00089	791		0.00384	216		17
GO:0050778	positive regulation of immune response	609		284	46.6338	170.96	1.5e-23	48		0.00077	122		225	36.9458	115.91	1.8e-26	41		0.00029	78		61	10.0164	19.99	3.5e-15	30		0.13705	484		19	3.11987	10.37	0.00805	338		0.30485	853		282	46.3054	173.37	8e-22	47		9.6e-05	56		279
GO:0035456	response to interferon-beta	26		16	61.5385	7.3	0.00037	688		0.00082	123		17	65.3846	4.95	2.9e-07	275		5.9e-05	53		10	38.4615	0.85	4.3e-09	67		0.02553	185		6	23.0769	0.44	3.9e-06	56		5.3e-06	9		14	53.8462	7.4	0.00565	1121		0.0009	126		17
GO:0016064	immunoglobulin mediated immune response	94		35	37.234	26.39	0.0333	1835		0.00082	124		25	26.5957	17.89	0.04477	1828		0.00828	274		10	10.6383	3.08	0.00101	292		0.00462	78		6	6.38298	1.6	0.00534	290		0.61764	1181		35	37.234	26.76	0.04036	1892		0.00846	293		35
GO:0043302	positive regulation of leukocyte degranulation	20		14	70	5.61	0.00012	596		0.00082	125		11	55	3.81	0.00036	659		0.00092	114		1	5	0.66	0.48719	3120		0.48719	1516		0	0	0.34	1	5939		1	1411		14	70	5.69	0.00014	605		0.0009	127		14
GO:1904385	cellular response to angiotensin	15		10	66.6667	4.21	0.0021	935		0.00082	126		5	33.3333	2.85	0.14008	2634		0.18201	1319		1	6.66667	0.49	0.39395	2783		0.39395	1337		NA	NA	NA	NA	NA		NA	7750		9	60	4.27	0.01057	1311		0.0085	296		9
GO:0043313	regulation of neutrophil degranulation	8		7	87.5	2.25	0.00083	794		0.00083	127		4	50	1.52	0.04778	1864		0.04778	614		0	0	0.26	1	6429		1	2336		0	0	0.14	1	5943		1	1412		7	87.5	2.28	0.00091	797		0.00091	129		7
GO:0055088	lipid homeostasis	91		34	37.3626	25.55	0.03381	1836		0.00083	128		25	27.4725	17.32	0.03115	1696		0.03473	517		2	2.1978	2.99	0.80482	4122		1	2288		6	6.59341	1.55	0.00456	279		0.35529	927		36	39.5604	25.91	0.0145	1402		0.00349	211		34
GO:0006958	complement activation, classical pathway	25		15	60	7.02	0.00083	798		0.00083	129		10	40	4.76	0.01224	1319		0.01224	324		6	24	0.82	0.00013	190		0.00013	24		5	20	0.43	5.5e-05	82		5.5e-05	14		14	56	7.12	0.00352	1021		0.00352	213		15
GO:0009247	glycolipid biosynthetic process	55		13	23.6364	15.44	0.81036	6279		0.00084	130		8	14.5455	10.47	0.84734	6384		0.0481	615		1	1.81818	1.8	0.84105	4208		0.84105	2002		1	1.81818	0.94	0.61194	2947		0.61194	1172		14	25.4545	15.66	0.73653	5887		0.00858	325		12
GO:0002374	cytokine secretion involved in immune response	16		11	68.75	4.49	0.00084	803		0.00084	131		9	56.25	3.05	0.00101	775		0.00101	121		3	18.75	0.53	0.0143	572		0.0143	123		0	0	0.27	1	3970		1	1413		11	68.75	4.55	0.00096	807		0.00096	134		11
GO:0001774	microglial cell activation	25		17	68	7.02	3.8e-05	503		0.00093	132		13	52	4.76	0.00022	598		0.00169	147		4	16	0.82	0.00837	486		0.00971	102		0	0	0.43	1	3867		1	1414		16	64	7.12	0.00023	639		0.0056	236		15
GO:0051851	modification by host of symbiont morphology or physiology	65		28	43.0769	18.25	0.00663	1211		0.00093	133		15	23.0769	12.37	0.2445	3303		0.5144	2935		1	1.53846	2.13	0.88632	4357		0.88632	2041		1	1.53846	1.11	0.67344	3087		1	1415		28	43.0769	18.5	0.00814	1224		0.00105	137		27
GO:1900016	negative regulation of cytokine production involved in inflammatory response	14		10	71.4286	3.93	0.00094	810		0.00094	134		9	64.2857	2.66	0.00026	621		0.00026	73		1	7.14286	0.46	0.37336	2681		0.37336	1278		0	0	0.24	1	7643		1	1416		10	71.4286	3.99	0.00106	817		0.00106	139		10
GO:0002673	regulation of acute inflammatory response	68		34	50	19.09	0.0001	581		0.00094	135		26	38.2353	12.94	0.00017	580		0.00317	196		8	11.7647	2.23	0.00166	321		0.00333	70		6	8.82353	1.16	0.00103	169		0.00103	24		34	50	19.36	0.00014	602		0.00336	209		33
GO:2000379	positive regulation of reactive oxygen species metabolic process	77		46	59.7403	21.62	5.9e-09	196		0.00096	136		39	50.6494	14.66	3.9e-10	148		6.5e-05	56		3	3.8961	2.53	0.4657	3049		0.62513	1756		3	3.8961	1.31	0.14359	1243		0.44082	1028		46	59.7403	21.92	9.5e-09	175		0.0042	220		45
GO:0002888	positive regulation of myeloid leukocyte mediated immunity	28		17	60.7143	7.86	0.00031	664		0.00097	137		13	46.4286	5.33	0.00088	755		0.00487	220		2	7.14286	0.92	0.23385	1926		0.51967	1570		0	0	0.48	1	4048		1	1417		17	60.7143	7.97	0.00037	676		0.00107	141		17
GO:0035455	response to interferon-alpha	19		12	63.1579	5.33	0.00149	878		0.00097	138		13	68.4211	3.62	3.6e-06	350		2.7e-06	28		5	26.3158	0.62	0.0003	224		0.04014	239		8	42.1053	0.32	4e-10	37		4.3e-09	5		10	52.6316	5.41	0.02262	1571		0.03688	572		12
GO:0032494	response to peptidoglycan	10		8	80	2.81	0.00097	817		0.00097	139		4	40	1.9	0.10437	2367		0.10437	983		3	30	0.33	0.00355	380		0.00355	73		1	10	0.17	0.15786	1305		0.15786	506		7	70	2.85	0.00772	1207		0.00772	278		8
GO:0045953	negative regulation of natural killer cell mediated cytotoxicity	10		8	80	2.81	0.00097	818		0.00097	140		7	70	1.9	0.00063	717		0.00063	100		1	10	0.33	0.2838	2242		0.2838	1034		1	10	0.17	0.15786	1308		0.15786	507		8	80	2.85	0.00108	822		0.00108	143		8
GO:0050922	negative regulation of chemotaxis	43		17	39.5349	12.07	0.06931	2273		0.00098	141		14	32.5581	8.18	0.02434	1565		0.02665	449		3	6.97674	1.41	0.16651	1537		0.63153	1762		3	6.97674	0.73	0.0365	575		1	1418		17	39.5349	12.24	0.07763	2276		0.00108	144		14
GO:0060334	regulation of interferon-gamma-mediated signaling pathway	24		17	70.8333	6.74	1.7e-05	445		0.00098	142		12	50	4.57	0.00061	708		0.05988	702		4	16.6667	0.79	0.00722	460		0.05667	281		3	12.5	0.41	0.00757	330		0.26409	773		16	66.6667	6.83	0.00011	579		0.00663	256		16
GO:0002693	positive regulation of cellular extravasation	12		9	75	3.37	0.00099	820		0.00099	143		6	50	2.28	0.01523	1407		0.01523	366		1	8.33333	0.39	0.33007	2491		0.33007	1169		0	0	0.2	1	4019		1	1419		8	66.6667	3.42	0.00668	1155		0.00668	258		9
GO:0035774	positive regulation of insulin secretion involved in cellular response to glucose stimulus	23		14	60.8696	6.46	0.00101	825		0.00101	144		8	34.7826	4.38	0.05558	1977		0.05558	688		0	0	0.75	1	6225		1	2364		0	0	0.39	1	5688		1	1420		11	47.8261	6.55	0.03805	1877		0.03805	593		14
GO:0050663	cytokine secretion	166		87	52.4096	46.6	2.6e-11	126		0.00112	145		72	43.3735	31.59	4.1e-13	95		0.00247	177		26	15.6627	5.45	3e-11	50		0.13917	492		6	3.61446	2.83	0.06455	732		1	1421		89	53.6145	47.26	6.9e-12	112		0.00129	149		84
GO:0032418	lysosome localization	60		37	61.6667	16.84	5.6e-08	237		0.00119	146		22	36.6667	11.42	0.00102	780		0.08634	811		1	1.66667	1.97	0.86557	4282		1	2404		3	5	1.02	0.08231	859		0.04889	167		35	58.3333	17.08	1.2e-06	307		0.00533	229		37
GO:0045807	positive regulation of endocytosis	117		60	51.2821	32.85	8.7e-08	245		0.0012	147		37	31.6239	22.27	0.00074	733		0.00064	102		6	5.12821	3.84	0.18658	1706		0.63831	1772		4	3.4188	1.99	0.13908	1176		0.13908	452		57	48.7179	33.31	2.6e-06	336		0.00065	111		54
GO:0006919	activation of cysteine-type endopeptidase activity involved in apoptotic process	80		37	46.25	22.46	0.00039	705		0.00127	148		33	41.25	15.23	3.5e-06	348		1e-05	40		5	6.25	2.63	0.12225	1320		0.12225	450		4	5	1.36	0.04749	652		0.12692	402		35	43.75	22.77	0.00244	941		0.00351	212		35
GO:0042866	pyruvate biosynthetic process	62		29	46.7742	17.41	0.00129	857		0.00129	149		23	37.0968	11.8	0.00065	724		0.00065	104		2	3.22581	2.03	0.60854	3552		0.60854	1738		0	0	1.06	1	5905		1	1422		28	45.1613	17.65	0.00368	1035		0.00368	215		30
GO:0048010	vascular endothelial growth factor receptor signaling pathway	80		41	51.25	22.46	9.6e-06	419		0.00129	150		29	36.25	15.23	0.00022	600		5.7e-05	52		4	5	2.63	0.26785	2173		0.26056	997		1	1.25	1.36	0.74797	3231		0.74797	1269		42	52.5	22.77	4.9e-06	368		0.00023	72		40
GO:0050776	regulation of immune response	781		368	47.1191	219.25	< 1e-30	36		0.00144	151		288	36.8758	148.64	< 1e-30	32		0.00035	85		73	9.34699	25.63	1.9e-16	27		0.51279	1563		30	3.84123	13.3	2.4e-05	71		0.23773	713		367	46.991	222.33	7.2e-30	36		0.00185	159		361
GO:0019730	antimicrobial humoral response	64		38	59.375	17.97	1.5e-07	264		0.00144	152		23	35.9375	12.18	0.00109	789		0.01714	391		2	3.125	2.1	0.62588	3595		0.62588	1757		3	4.6875	1.09	0.0955	904		1	1423		39	60.9375	18.22	5.9e-08	214		0.00033	81		37
GO:1903077	negative regulation of protein localization to plasma membrane	19		12	63.1579	5.33	0.00149	879		0.00149	153		6	31.5789	3.62	0.1364	2600		0.1364	1097		2	10.5263	0.62	0.12744	1331		0.12744	476		NA	NA	NA	NA	NA		NA	7751		13	68.4211	5.41	0.00035	675		0.00035	85		10
GO:0031663	lipopolysaccharide-mediated signaling pathway	52		30	57.6923	14.6	7.1e-06	403		0.00149	154		28	53.8462	9.9	2.1e-08	199		8.8e-06	36		9	17.3077	1.71	4.3e-05	154		0.00043	40		4	7.69231	0.89	0.0117	390		0.09608	280		31	59.6154	14.8	2.6e-06	340		0.00176	154		31
GO:0006953	acute-phase response	28		14	50	7.86	0.01135	1394		0.00149	155		12	42.8571	5.33	0.00321	979		0.00467	217		3	10.7143	0.92	0.06273	1009		0.12709	472		0	0	0.48	1	4385		1	1424		13	46.4286	7.97	0.03267	1794		0.00685	265		14
GO:0016032	viral process	654		258	39.4495	183.6	7.8e-11	133		0.00154	156		199	30.4281	124.47	4.3e-13	96		0.00173	154		43	6.57492	21.46	1.1e-05	130		0.0054	82		33	5.04587	11.14	1.9e-08	45		0.83263	1307		251	38.3792	186.18	1.3e-08	182		0.008	287		250
GO:0030100	regulation of endocytosis	213		108	50.7042	59.79	1.7e-12	116		0.00166	157		69	32.3944	40.54	2e-06	326		0.01758	394		9	4.22535	6.99	0.26624	2169		0.80363	1975		6	2.8169	3.63	0.15634	1271		1	1425		101	47.4178	60.64	2.7e-09	157		0.00577	242		101
GO:0006935	chemotaxis	458		172	37.5546	128.57	4.8e-06	389		0.00168	158		121	26.4192	87.17	5e-05	475		0.00211	160		21	4.58515	15.03	0.07702	1102		0.02378	184		20	4.36681	7.8	0.00011	93		0.10422	344		171	37.3362	130.38	1.8e-05	447		0.01473	361		170
GO:0002819	regulation of adaptive immune response	145		68	46.8966	40.71	9.8e-07	317		0.00168	159		53	36.5517	27.6	5.1e-07	287		0.04943	621		12	8.27586	4.76	0.00295	370		0.00032	34		7	4.82759	2.47	0.01204	397		0.08098	213		67	46.2069	41.28	3.8e-06	357		0.00181	156		67
GO:1903531	negative regulation of secretion by cell	148		61	41.2162	41.55	0.00037	689		0.0017	160		45	30.4054	28.17	0.00056	697		0.26487	1850		12	8.10811	4.86	0.00349	378		0.28004	1012		5	3.37838	2.52	0.10864	996		0.35789	928		62	41.8919	42.13	0.0003	658		0.00182	158		58
GO:0046364	monosaccharide biosynthetic process	80		33	41.25	22.46	0.0075	1245		0.00172	161		19	23.75	15.23	0.17364	2820		0.00025	72		2	2.5	2.63	0.74357	3968		1	2162		1	1.25	1.36	0.74797	3232		1	1426		28	35	22.77	0.12118	2597		0.00186	161		31
GO:0034134	toll-like receptor 2 signaling pathway	16		13	81.25	4.49	1.5e-05	439		0.00173	162		9	56.25	3.05	0.00101	776		0.00553	238		7	43.75	0.53	3.5e-07	93		0.00033	35		0	0	0.27	1	5533		1	1427		13	81.25	4.55	1.8e-05	446		0.00185	160		12
GO:0002467	germinal center formation	14		9	64.2857	3.93	0.00509	1136		0.00174	163		4	28.5714	2.66	0.26891	3386		0.24297	1678		1	7.14286	0.46	0.37336	2712		1	2848		0	0	0.24	1	3982		1	1428		9	64.2857	3.99	0.00564	1113		0.00186	162		9
GO:1902339	positive regulation of apoptotic process involved in morphogenesis	5		5	100	1.4	0.00174	896		0.00174	164		4	80	0.95	0.00555	1102		0.00555	241		NA	NA	NA	NA	NA		NA	NA		NA	NA	NA	NA	NA		NA	7752		5	100	1.42	0.00187	895		0.00187	164		4
GO:2001188	regulation of T cell activation via T cell receptor contact with antigen bound to MHC molecule on antigen presenting cell	5		5	100	1.4	0.00174	897		0.00174	165		5	100	0.95	0.00025	618		0.00025	69		1	20	0.16	0.15369	1424		0.15369	529		1	20	0.09	0.0823	824		0.0823	216		5	100	1.42	0.00187	897		0.00187	165		5
GO:0050765	negative regulation of phagocytosis	17		11	64.7059	4.77	0.00178	901		0.00178	166		11	64.7059	3.24	4.6e-05	469		4.6e-05	48		1	5.88235	0.56	0.43312	2920		0.43312	1400		0	0	0.29	1	6466		1	1429		11	64.7059	4.84	0.00202	904		0.00202	170		11
GO:0032691	negative regulation of interleukin-1 beta production	17		11	64.7059	4.77	0.00178	902		0.00178	167		11	64.7059	3.24	4.6e-05	470		4.6e-05	49		3	17.6471	0.56	0.01694	625		0.01694	147		1	5.88235	0.29	0.25334	1763		0.25334	750		12	70.5882	4.84	0.00038	683		0.00038	90		11
GO:1901687	glutathione derivative biosynthetic process	17		11	64.7059	4.77	0.00178	903		0.00178	168		10	58.8235	3.24	0.00032	644		0.00032	81		NA	NA	NA	NA	NA		NA	NA		2	11.7647	0.29	0.03318	550		0.03318	124		9	52.9412	4.84	0.02893	1726		0.02893	542		11
GO:0120163	negative regulation of cold-induced thermogenesis	39		20	51.2821	10.95	0.00181	913		0.00181	169		15	38.4615	7.42	0.00367	1004		0.00367	200		1	2.5641	1.28	0.72837	3910		0.72837	1895		1	2.5641	0.66	0.4887	2619		0.4887	1077		21	53.8462	11.1	0.00074	767		0.00074	116		19
GO:0032989	cellular component morphogenesis	840		268	31.9048	235.81	0.00636	1200		0.00181	170		147	17.5	159.87	0.88872	6670		0.34966	2335		26	3.09524	27.57	0.6521	3681		0.21063	843		13	1.54762	14.3	0.67991	3099		0.92403	1342		256	30.4762	239.13	0.09826	2418		0.02537	528		256
GO:0032729	positive regulation of interferon-gamma production	55		26	47.2727	15.44	0.00186	917		0.00186	171		22	40	10.47	0.00025	615		0.00025	68		6	10.9091	1.8	0.00899	490		0.00899	98		3	5.45455	0.94	0.06703	744		0.06703	196		25	45.4545	15.66	0.00532	1102		0.00532	227		25
GO:0006909	phagocytosis	220		127	57.7273	61.76	1.7e-20	62		0.00187	172		85	38.6364	41.87	7.1e-12	118		0.58274	3209		19	8.63636	7.22	0.00012	183		1	3739		9	4.09091	3.75	0.01312	407		0.55356	1129		119	54.0909	62.63	8.3e-16	70		0.00624	246		129
GO:0045429	positive regulation of nitric oxide biosynthetic process	34		18	52.9412	9.54	0.00191	922		0.00191	173		14	41.1765	6.47	0.00235	931		0.00235	173		0	0	1.12	1	6565		1	2180		2	5.88235	0.58	0.11364	1052		0.11364	393		19	55.8824	9.68	0.00072	760		0.00072	115		19
GO:0048013	ephrin receptor signaling pathway	69		31	44.9275	19.37	0.00201	930		0.00201	174		19	27.5362	13.13	0.05403	1966		0.05403	683		3	4.34783	2.26	0.39583	2822		0.39583	1349		2	2.89855	1.17	0.32898	2082		0.32898	891		28	40.5797	19.64	0.02016	1534		0.02016	409		30
GO:0071346	cellular response to interferon-gamma	145		86	59.3103	40.71	2.8e-15	82		0.00202	175		79	54.4828	27.6	1.1e-21	58		3.7e-06	32		31	21.3793	4.76	4.2e-17	24		0.00016	26		17	11.7241	2.47	3.9e-10	36		0.01965	104		82	56.5517	41.28	1.1e-12	103		0.00557	234		81
GO:0007015	actin filament organization	326		130	39.8773	91.52	2.2e-06	358		0.00206	176		77	23.6196	62.05	0.02144	1512		0.03566	531		13	3.98773	10.7	0.27463	2205		0.0719	340		4	1.22699	5.55	0.81003	3357		0.41929	1003		124	38.0368	92.8	9.9e-05	570		0.0164	378		128
GO:0042789	mRNA transcription by RNA polymerase II	15		10	66.6667	4.21	0.0021	936		0.0021	177		5	33.3333	2.85	0.14008	2628		0.14008	1115		1	6.66667	0.49	0.39395	2784		0.39395	1332		0	0	0.26	1	5899		1	1430		9	60	4.27	0.01057	1312		0.01057	334		10
GO:0097164	ammonium ion metabolic process	150		59	39.3333	42.11	0.0018	911		0.00215	178		43	28.6667	28.55	0.00263	946		0.00237	175		5	3.33333	4.92	0.54951	3340		0.704	1860		3	2	2.55	0.47202	2574		0.47202	1057		61	40.6667	42.7	0.00084	780		0.00064	108		54
GO:0022900	electron transport chain	163		67	41.1043	45.76	0.00022	638		0.00225	179		68	41.7178	31.02	1.6e-11	125		4.1e-06	33		5	3.06748	5.35	0.62354	3594		0.16023	612		1	0.613497	2.78	0.94023	3604		1	1431		73	44.7853	46.4	5.9e-06	383		0.00276	186		63
GO:0070266	necroptotic process	33		18	54.5455	9.26	0.00121	846		0.0024	180		15	45.4545	6.28	0.00048	684		0.00087	108		1	3.0303	1.08	0.66797	3733		0.66797	1803		1	3.0303	0.56	0.43304	2469		1	1432		19	57.5758	9.39	0.00043	696		0.01294	350		18
GO:2000249	regulation of actin cytoskeleton reorganization	28		15	53.5714	7.86	0.00388	1074		0.00241	181		16	57.1429	5.33	8.3e-06	385		0.00011	59		1	3.57143	0.92	0.60753	3542		1	2160		NA	NA	NA	NA	NA		NA	7753		13	46.4286	7.97	0.03267	1796		0.04774	646		16
GO:0035723	interleukin-15-mediated signaling pathway	13		9	69.2308	3.65	0.00242	965		0.00242	182		8	61.5385	2.47	0.00088	750		0.00088	109		1	7.69231	0.43	0.35208	2599		0.35208	1234		0	0	0.22	1	5679		1	1433		9	69.2308	3.7	0.00269	953		0.00269	183		9
GO:0002221	pattern recognition receptor signaling pathway	159		82	51.5723	44.64	2.8e-10	146		0.00246	183		69	43.3962	30.26	1.2e-12	105		0.00026	75		26	16.3522	5.22	1.1e-11	46		0.00098	46		5	3.14465	2.71	0.13532	1163		0.1126	354		84	52.8302	45.26	7.4e-11	129		0.00266	180		80
GO:0060193	positive regulation of lipase activity	41		17	41.4634	11.51	0.04476	2015		0.00259	184		13	31.7073	7.8	0.03634	1766		0.0037	202		3	7.31707	1.35	0.15061	1414		1	2186		2	4.87805	0.7	0.15407	1258		0.11309	359		16	39.0244	11.67	0.0947	2385		0.00281	187		18
GO:0002476	antigen processing and presentation of endogenous peptide antigen via MHC class Ib	7		6	85.7143	1.97	0.00259	986		0.00259	185		7	100	1.33	9e-06	387		9e-06	37		1	14.2857	0.23	0.20835	1779		0.20835	774		0	0	0.12	1	3984		1	1434		6	85.7143	1.99	0.00281	966		0.00281	188		6
GO:1903980	positive regulation of microglial cell activation	7		6	85.7143	1.97	0.00259	987		0.00259	186		3	42.8571	1.33	0.13174	2543		0.13174	1056		1	14.2857	0.23	0.20835	1764		0.20835	785		NA	NA	NA	NA	NA		NA	7754		6	85.7143	1.99	0.00281	967		0.00281	189		6
GO:1902774	late endosome to lysosome transport	7		6	85.7143	1.97	0.00259	988		0.00259	187		3	42.8571	1.33	0.13174	2553		0.13174	1066		1	14.2857	0.23	0.20835	1809		0.20835	787		1	14.2857	0.12	0.1133	1034		0.1133	361		5	71.4286	1.99	0.02287	1583		0.02287	431		5
GO:2000258	negative regulation of protein activation cascade	7		6	85.7143	1.97	0.00259	989		0.00259	188		4	57.1429	1.33	0.02806	1631		0.02806	490		1	14.2857	0.23	0.20835	1800		0.20835	780		1	14.2857	0.12	0.1133	1017		0.1133	362		5	71.4286	1.99	0.02287	1588		0.02287	432		6
GO:0045916	negative regulation of complement activation	7		6	85.7143	1.97	0.00259	990		0.00259	189		4	57.1429	1.33	0.02806	1640		0.02806	499		1	14.2857	0.23	0.20835	1769		0.20835	783		1	14.2857	0.12	0.1133	1035		0.1133	363		5	71.4286	1.99	0.02287	1596		0.02287	433		6
GO:0090385	phagosome-lysosome fusion	7		6	85.7143	1.97	0.00259	991		0.00259	190		3	42.8571	1.33	0.13174	2572		0.13174	1085		0	0	0.23	1	7613		1	2536		0	0	0.12	1	7433		1	1435		5	71.4286	1.99	0.02287	1597		0.02287	434		6
GO:0030168	platelet activation	131		62	47.3282	36.78	2e-06	350		0.0026	191		37	28.2443	24.93	0.00651	1136		0.13801	1103		9	6.87023	4.3	0.02856	774		0.08992	377		3	2.29008	2.23	0.38631	2305		0.7139	1249		63	48.0916	37.29	1.4e-06	315		0.01277	347		62
GO:0032495	response to muramyl dipeptide	20		14	70	5.61	0.00012	597		0.00267	192		7	35	3.81	0.06929	2081		0.34989	2338		2	10	0.66	0.13867	1364		0.30689	1105		1	5	0.34	0.29089	1930		0.29089	826		13	65	5.69	0.00073	764		0.01595	366		13
GO:0019886	antigen processing and presentation of exogenous peptide antigen via MHC class II	90		38	42.2222	25.27	0.00267	999		0.00267	193		22	24.4444	17.13	0.1211	2482		0.1211	1022		3	3.33333	2.95	0.57069	3420		0.57069	1682		1	1.11111	1.53	0.78799	3300		0.78799	1287		37	41.1111	25.62	0.0066	1151		0.0066	255		35
GO:0009313	oligosaccharide catabolic process	11		8	72.7273	3.09	0.00269	1001		0.00269	194		4	36.3636	2.09	0.14029	2646		0.14029	1122		2	18.1818	0.36	0.04858	923		0.04858	269		0	0	0.19	1	4589		1	1436		7	63.6364	3.13	0.01603	1422		0.01603	368		8
GO:0038110	interleukin-2-mediated signaling pathway	11		8	72.7273	3.09	0.00269	1002		0.00269	195		5	45.4545	2.09	0.04153	1801		0.04153	578		0	0	0.36	1	6295		1	2318		0	0	0.19	1	5781		1	1437		8	72.7273	3.13	0.00297	988		0.00297	196		7
GO:0010745	negative regulation of macrophage derived foam cell differentiation	11		8	72.7273	3.09	0.00269	1003		0.00269	196		5	45.4545	2.09	0.04153	1802		0.04153	579		0	0	0.36	1	5421		1	2319		1	9.09091	0.19	0.17221	1388		0.17221	561		8	72.7273	3.13	0.00297	989		0.00297	197		8
GO:0034383	low-density lipoprotein particle clearance	28		16	57.1429	7.86	0.00116	839		0.00277	197		11	39.2857	5.33	0.0102	1270		0.0071	265		2	7.14286	0.92	0.23385	1920		0.23385	855		1	3.57143	0.48	0.38208	2279		0.38208	958		15	53.5714	7.97	0.00449	1061		0.00316	206		15
GO:0045745	positive regulation of G protein-coupled receptor signaling pathway	20		12	60	5.61	0.00278	1012		0.00278	198		6	30	3.81	0.16516	2761		0.16516	1200		1	5	0.66	0.48719	3129		0.48719	1518		0	0	0.34	1	6158		1	1438		10	50	5.69	0.03392	1809		0.03392	557		12
GO:0002281	macrophage activation involved in immune response	9		7	77.7778	2.53	0.00281	1019		0.00281	199		6	66.6667	1.71	0.00234	922		0.00234	168		1	11.1111	0.3	0.25948	2096		0.25948	953		0	0	0.15	1	3953		1	1439		7	77.7778	2.56	0.00307	999		0.00307	201		7
GO:0060670	branching involved in labyrinthine layer morphogenesis	9		7	77.7778	2.53	0.00281	1020		0.00281	200		6	66.6667	1.71	0.00234	925		0.00234	171		1	11.1111	0.3	0.25948	2088		0.25948	954		0	0	0.15	1	6824		1	1440		6	66.6667	2.56	0.01941	1505		0.01941	391		7
GO:0032490	detection of molecule of bacterial origin	9		7	77.7778	2.53	0.00281	1021		0.00281	201		5	55.5556	1.71	0.01584	1433		0.01584	382		2	22.2222	0.3	0.0332	804		0.0332	224		0	0	0.15	1	5365		1	1441		7	77.7778	2.56	0.00307	1001		0.00307	202		7
GO:0017121	phospholipid scrambling	9		7	77.7778	2.53	0.00281	1022		0.00281	202		5	55.5556	1.71	0.01584	1435		0.01584	384		4	44.4444	0.3	0.00013	192		0.00013	25		0	0	0.15	1	4924		1	1442		6	66.6667	2.56	0.01941	1508		0.01941	392		7
GO:0043301	negative regulation of leukocyte degranulation	9		7	77.7778	2.53	0.00281	1023		0.00281	203		5	55.5556	1.71	0.01584	1436		0.01584	385		1	11.1111	0.3	0.25948	2087		0.25948	956		1	11.1111	0.15	0.14326	1190		0.14326	461		7	77.7778	2.56	0.00307	1002		0.00307	203		7
GO:2000641	regulation of early endosome to late endosome transport	17		8	47.0588	4.77	0.07473	2292		0.00282	204		6	35.2941	3.24	0.08689	2235		0.08689	819		NA	NA	NA	NA	NA		NA	NA		NA	NA	NA	NA	NA		NA	7755		8	47.0588	4.84	0.08029	2281		0.00308	205		8
GO:0044267	cellular protein metabolic process	4209		1279	30.3873	1181.58	2.7e-05	477		0.00287	205		876	20.8125	801.08	0.0002	589		0.03654	567		139	3.30245	138.13	0.4821	3114		0.14696	497		68	1.61559	71.67	0.72567	3199		1	1443		1277	30.3397	1198.2	0.00058	735		0.00353	214		1235
GO:0002223	stimulatory C-type lectin receptor signaling pathway	51		24	47.0588	14.32	0.00296	1031		0.00296	206		17	33.3333	9.71	0.01085	1286		0.01085	315		4	7.84314	1.67	0.08563	1152		0.08563	371		2	3.92157	0.87	0.21545	1610		0.21545	685		22	43.1373	14.52	0.0175	1463		0.0175	382		24
GO:1901216	positive regulation of neuron death	70		31	44.2857	19.65	0.00265	995		0.00302	207		26	37.1429	13.32	0.00029	637		0.04442	586		1	1.42857	2.3	0.90388	4403		1	2320		2	2.85714	1.19	0.33523	2091		0.33523	895		32	45.7143	19.93	0.00155	871		0.02542	531		30
GO:0050860	negative regulation of T cell receptor signaling pathway	18		11	61.1111	5.05	0.00343	1048		0.00343	208		8	44.4444	3.43	0.01205	1307		0.01205	323		3	16.6667	0.59	0.01985	658		0.01985	158		1	5.55556	0.31	0.26607	1829		0.26607	783		11	61.1111	5.12	0.00387	1037		0.00387	217		10
GO:0043161	proteasome-mediated ubiquitin-dependent protein catabolic process	376		133	35.3723	105.55	0.00104	831		0.00345	209		97	25.7979	71.56	0.00066	725		0.002	158		14	3.7234	12.34	0.35238	2635		0.65561	1793		2	0.531915	6.4	0.98902	3708		0.99094	1368		143	38.0319	107.04	3e-05	488		0.00044	97		126
GO:0019359	nicotinamide nucleotide biosynthetic process	87		42	48.2759	24.42	4.8e-05	526		0.00374	210		32	36.7816	16.56	7.6e-05	509		0.00613	251		4	4.5977	2.86	0.31964	2445		0.39084	1310		1	1.14943	1.48	0.7767	3280		1	1444		42	48.2759	24.77	6.8e-05	548		0.01082	336		42
GO:0015988	energy coupled proton transmembrane transport, against electrochemical gradient	28		15	53.5714	7.86	0.00388	1075		0.00388	211		14	50	5.33	0.00021	597		0.00021	67		0	0	0.92	1	5568		1	2161		0	0	0.48	1	4874		1	1445		16	57.1429	7.97	0.00137	852		0.00137	150		13
GO:0045773	positive regulation of axon extension	33		16	48.4848	9.26	0.01005	1360		0.00388	212		11	33.3333	6.28	0.03672	1770		0.02844	503		3	9.09091	1.08	0.09286	1174		0.09286	381		0	0	0.56	1	6164		1	1446		13	39.3939	9.39	0.11688	2582		0.07316	845		14
GO:0060964	regulation of gene silencing by miRNA	59		23	38.9831	16.56	0.04544	2021		0.00389	213		19	32.2034	11.23	0.01093	1287		0.00319	197		0	0	1.94	1	7171		1	2185		0	0	1	1	6863		1	1447		22	37.2881	16.8	0.08914	2349		0.00451	221		23
GO:0032482	Rab protein signal transduction	69		30	43.4783	19.37	0.0043	1088		0.0043	214		20	28.9855	13.13	0.02955	1683		0.02955	509		2	2.89855	2.26	0.6666	3717		0.6666	1800		1	1.44928	1.17	0.69523	3130		0.69523	1239		30	43.4783	19.64	0.00536	1104		0.00536	230		28
GO:0032728	positive regulation of interferon-beta production	31		16	51.6129	8.7	0.00469	1109		0.00469	215		13	41.9355	5.9	0.00276	950		0.00276	185		9	29.0323	1.02	4.3e-07	96		4.3e-07	15		2	6.45161	0.53	0.0973	909		0.0973	281		17	54.8387	8.82	0.00181	889		0.00181	157		16
GO:2001243	negative regulation of intrinsic apoptotic signaling pathway	84		41	48.8095	23.58	4.3e-05	516		0.00471	216		32	38.0952	15.99	3.4e-05	441		0.0855	804		4	4.7619	2.76	0.2973	2328		1	2400		NA	NA	NA	NA	NA		NA	7756		42	50	23.91	2.4e-05	471		0.00532	228		42
GO:0006120	mitochondrial electron transport, NADH to ubiquinone	47		22	46.8085	13.19	0.00472	1119		0.00472	217		23	48.9362	8.95	3.4e-06	344		3.4e-06	31		0	0	1.54	1	5033		1	2157		1	2.12766	0.8	0.55454	2805		0.55454	1130		24	51.0638	13.38	0.00088	790		0.00088	123		19
GO:0045765	regulation of angiogenesis	220		77	35	61.76	0.01413	1473		0.00473	218		54	24.5455	41.87	0.02451	1567		0.19349	1515		11	5	7.22	0.10938	1268		0.14867	499		6	2.72727	3.75	0.17339	1417		0.33593	896		79	35.9091	62.63	0.00941	1297		0.04758	643		73
GO:0097192	extrinsic apoptotic signaling pathway in absence of ligand	56		24	42.8571	15.72	0.01232	1429		0.00482	219		19	33.9286	10.66	0.00591	1117		0.01028	314		1	1.78571	1.84	0.84629	4226		1	2223		2	3.57143	0.95	0.24695	1749		0.30252	840		21	37.5	15.94	0.09035	2360		0.0055	232		24
GO:0010575	positive regulation of vascular endothelial growth factor production	21		12	57.1429	5.9	0.00484	1122		0.00484	220		6	28.5714	4	0.19621	2945		0.19621	1518		1	4.7619	0.69	0.50405	3179		0.50405	1548		1	4.7619	0.36	0.30298	1972		0.30298	842		12	57.1429	5.98	0.00548	1110		0.00548	231		13
GO:1904646	cellular response to amyloid-beta	26		14	53.8462	7.3	0.00492	1129		0.00492	221		12	46.1538	4.95	0.00148	847		0.00148	141		1	3.84615	0.85	0.58039	3445		0.58039	1693		NA	NA	NA	NA	NA		NA	7757		14	53.8462	7.4	0.00565	1122		0.00565	241		13
GO:0002407	dendritic cell chemotaxis	21		11	52.381	5.9	0.01596	1507		0.00509	222		8	38.0952	4	0.03283	1706		0.03504	521		3	14.2857	0.69	0.03009	788		0.03009	208		1	4.7619	0.36	0.30298	1993		1	1448		11	52.381	5.98	0.01775	1470		0.00564	237		11
GO:0043651	linoleic acid metabolic process	14		9	64.2857	3.93	0.00509	1137		0.00509	223		6	42.8571	2.66	0.03508	1740		0.03508	524		0	0	0.46	1	6464		1	2290		0	0	0.24	1	5993		1	1449		8	57.1429	3.99	0.02296	1612		0.02296	459		9
GO:1901741	positive regulation of myoblast fusion	14		9	64.2857	3.93	0.00509	1138		0.00509	224		6	42.8571	2.66	0.03508	1744		0.03508	528		1	7.14286	0.46	0.37336	2701		0.37336	1281		NA	NA	NA	NA	NA		NA	7758		9	64.2857	3.99	0.00564	1115		0.00564	238		9
GO:2000406	positive regulation of T cell migration	25		12	48	7.02	0.02685	1763		0.00509	225		9	36	4.76	0.03502	1730		0.00171	152		1	4	0.82	0.56612	3412		1	2177		1	4	0.43	0.34934	2142		0.34934	915		12	48	7.12	0.02986	1764		0.00564	239		12
GO:0006342	chromatin silencing	78		30	38.4615	21.9	0.02994	1804		0.00513	226		17	21.7949	14.85	0.30814	3588		0.14186	1147		3	3.84615	2.56	0.4742	3095		0.4742	1500		0	0	1.33	1	4239		1	1450		31	39.7436	22.2	0.02069	1545		0.00262	179		30
GO:0050766	positive regulation of phagocytosis	50		27	54	14.04	9.9e-05	580		0.00538	227		18	36	9.52	0.00357	1001		0.04478	588		4	8	1.64	0.0809	1118		1	2321		2	4	0.85	0.20919	1562		1	1451		27	54	14.23	0.00013	589		0.00628	248		27
GO:0034614	cellular response to reactive oxygen species	137		55	40.146	38.46	0.00147	875		0.00581	228		32	23.3577	26.07	0.11906	2473		0.3061	1963		5	3.64964	4.5	0.46918	3052		0.71848	1878		2	1.45985	2.33	0.68083	3100		0.61922	1184		56	40.8759	39	0.00116	841		0.00669	262		55
GO:0030041	actin filament polymerization	153		63	41.1765	42.95	0.00031	665		0.00589	229		44	28.7582	29.12	0.00221	911		0.00456	214		3	1.96078	5.02	0.88273	4351		0.12913	479		2	1.30719	2.61	0.73811	3213		0.27999	818		64	41.8301	43.56	0.00025	648		0.00033	82		63
GO:0032963	collagen metabolic process	78		37	47.4359	21.9	0.00021	634		0.00597	230		22	28.2051	14.85	0.03136	1699		0.40542	2535		5	6.41026	2.56	0.11298	1277		0.13808	488		3	3.84615	1.33	0.14757	1250		1	1452		34	43.5897	22.2	0.003	997		0.09397	1000		37
GO:0008015	blood circulation	328		113	34.4512	92.08	0.0062	1188		0.00602	231		72	21.9512	62.43	0.09951	2341		0.02647	447		15	4.57317	10.76	0.12282	1325		0.00715	90		10	3.04878	5.59	0.05435	680		0.00739	66		120	36.5854	93.37	0.00076	769		0.01985	408		110
GO:0019048	modulation by virus of host morphology or physiology	33		16	48.4848	9.26	0.01005	1361		0.00606	232		13	39.3939	6.28	0.00526	1091		0.01514	362		2	6.06061	1.08	0.29524	2316		0.29524	1090		2	6.06061	0.56	0.10812	992		0.10812	349		15	45.4545	9.39	0.0278	1709		0.00667	257		15
GO:0043149	stress fiber assembly	83		30	36.1446	23.3	0.06682	2238		0.00606	233		20	24.0964	15.8	0.14964	2712		0.17979	1284		2	2.40964	2.72	0.76174	4007		1	2621		0	0	1.41	1	5927		1	1453		28	33.7349	23.63	0.17182	2948		0.09477	1004		28
GO:1902902	negative regulation of autophagosome assembly	12		8	66.6667	3.37	0.00609	1172		0.00609	234		6	50	2.28	0.01523	1411		0.01523	370		1	8.33333	0.39	0.33007	2474		0.33007	1172		NA	NA	NA	NA	NA		NA	7759		9	75	3.42	0.00111	831		0.00111	147		7
GO:0010875	positive regulation of cholesterol efflux	12		8	66.6667	3.37	0.00609	1173		0.00609	235		4	33.3333	2.28	0.18028	2840		0.18028	1299		0	0	0.39	1	5447		1	2629		2	16.6667	0.2	0.01703	453		0.01703	100		8	66.6667	3.42	0.00668	1157		0.00668	259		8
GO:0045579	positive regulation of B cell differentiation	12		8	66.6667	3.37	0.00609	1174		0.00609	236		5	41.6667	2.28	0.06031	2020		0.06031	714		1	8.33333	0.39	0.33007	2499		0.33007	1178		0	0	0.2	1	6114		1	1454		8	66.6667	3.42	0.00668	1158		0.00668	260		7
GO:0032802	low-density lipoprotein particle receptor catabolic process	12		8	66.6667	3.37	0.00609	1175		0.00609	237		4	33.3333	2.28	0.18028	2841		0.18028	1300		0	0	0.39	1	5987		1	2630		1	8.33333	0.2	0.18632	1449		0.18632	605		9	75	3.42	0.00111	832		0.00111	148		8
GO:0045454	cell redox homeostasis	59		26	44.0678	16.56	0.00611	1185		0.00611	238		21	35.5932	11.23	0.00202	905		0.00202	159		5	8.47458	1.94	0.04379	892		0.04379	258		1	1.69492	1	0.63781	3014		0.63781	1199		30	50.8475	16.8	0.00023	638		0.00023	73		24
GO:0032692	negative regulation of interleukin-1 production	21		15	71.4286	5.9	4.6e-05	521		0.00616	239		14	66.6667	4	2.4e-06	333		0.02341	420		3	14.2857	0.69	0.03009	790		1	2249		1	4.7619	0.36	0.30298	1986		1	1455		16	76.1905	5.98	7.9e-06	401		0.00651	251		15
GO:0010656	negative regulation of muscle cell apoptotic process	30		14	46.6667	8.42	0.02292	1680		0.00618	240		10	33.3333	5.71	0.04535	1838		0.02357	425		1	3.33333	0.98	0.63292	3614		1	2254		0	0	0.51	1	4681		1	1456		14	46.6667	8.54	0.02581	1692		0.00654	252		14
GO:0010829	negative regulation of glucose transmembrane transport	13		8	61.5385	3.65	0.01195	1416		0.00619	241		6	46.1538	2.47	0.0238	1547		0.16583	1216		0	0	0.43	1	5434		1	2585		0	0	0.22	1	4736		1	1457		7	53.8462	3.7	0.04785	1985		0.07247	815		8
GO:0097352	autophagosome maturation	35		18	51.4286	9.83	0.00291	1027		0.00622	242		12	34.2857	6.66	0.0239	1553		0.00883	298		3	8.57143	1.15	0.10629	1256		0.54995	1639		1	2.85714	0.6	0.45223	2518		0.45223	1040		19	54.2857	9.96	0.00116	843		0.00208	171		18
GO:0000183	chromatin silencing at rDNA	24		13	54.1667	6.74	0.00626	1195		0.00626	243		8	33.3333	4.57	0.06995	2092		0.06995	741		0	0	0.79	1	4750		1	2374		0	0	0.41	1	3762		1	1458		13	54.1667	6.83	0.00711	1179		0.00711	268		13
GO:0042102	positive regulation of T cell proliferation	85		35	41.1765	23.86	0.00622	1193		0.00638	244		26	30.5882	16.18	0.00695	1144		0.05836	698		8	9.41176	2.79	0.00668	446		0.02201	177		4	4.70588	1.45	0.05702	690		0.19488	625		36	42.3529	24.2	0.00413	1050		0.00324	208		33
GO:0017001	antibiotic catabolic process	48		22	45.8333	13.47	0.00644	1202		0.00644	245		17	35.4167	9.14	0.00552	1100		0.00552	237		1	2.08333	1.58	0.79904	4101		0.79904	1972		3	6.25	0.82	0.04812	655		0.04812	164		19	39.5833	13.66	0.06373	2199		0.06373	780		21
GO:0032088	negative regulation of NF-kappaB transcription factor activity	71		30	42.2535	19.93	0.00705	1223		0.00663	246		21	29.5775	13.51	0.02101	1511		0.03059	512		5	7.04225	2.33	0.0834	1132		0.0834	362		1	1.40845	1.21	0.70558	3152		0.70558	1244		30	42.2535	20.21	0.00872	1283		0.00813	290		30
GO:0031331	positive regulation of cellular catabolic process	314		122	38.8535	88.15	1.9e-05	456		0.00674	247		85	27.0701	59.76	0.00027	628		0.58803	3223		21	6.6879	10.3	0.00163	318		0.5269	1592		5	1.59236	5.35	0.62267	2979		1	1459		121	38.535	89.39	6.3e-05	538		0.12157	1149		119
GO:0002286	T cell activation involved in immune response	79		41	51.8987	22.18	6.4e-06	395		0.00692	248		35	44.3038	15.04	2.3e-07	264		0.10212	957		5	6.32911	2.59	0.11757	1307		0.2828	1020		3	3.79747	1.35	0.15159	1256		1	1460		40	50.6329	22.49	2.5e-05	476		0.00755	271		41
GO:0043065	positive regulation of apoptotic process	528		207	39.2045	148.22	1.1e-08	210		0.00694	249		152	28.7879	100.49	2e-08	198		0.12397	1024		31	5.87121	17.33	0.00126	308		0.12064	446		17	3.2197	8.99	0.00891	350		0.41283	994		202	38.2576	150.31	4.6e-07	279		0.0218	414		200
GO:0009620	response to fungus	31		25	80.6452	8.7	1.7e-09	177		0.00695	250		14	45.1613	5.9	0.00079	739		0.29154	1899		2	6.45161	1.02	0.27069	2189		0.28362	1032		1	3.22581	0.53	0.41318	2384		0.41318	996		26	83.871	8.82	2.1e-10	133		0.00105	138		25
GO:0002262	myeloid cell homeostasis	136		52	38.2353	38.18	0.00633	1199		0.00698	251		37	27.2059	25.88	0.01223	1317		0.02641	446		5	3.67647	4.46	0.4628	3045		1	2262		3	2.20588	2.32	0.40928	2382		0.15795	544		56	41.1765	38.72	0.00094	803		0.00755	272		47
GO:0031638	zymogen activation	39		22	56.4103	10.95	0.00019	627		0.00701	252		22	56.4103	7.42	2.3e-07	263		0.00479	218		2	5.12821	1.28	0.36781	2673		1	2191		2	5.12821	0.66	0.14224	1186		0.35942	929		24	61.5385	11.1	1.7e-05	441		0.00106	140		22
GO:0097242	amyloid-beta clearance	19		14	73.6842	5.33	4.8e-05	525		0.00704	253		10	52.6316	3.62	0.00105	783		0.10383	967		2	10.5263	0.62	0.12744	1332		0.12744	475		1	5.26316	0.32	0.27859	1892		1	1461		15	78.9474	5.41	7.2e-06	395		0.00765	275		13
GO:0042136	neurotransmitter biosynthetic process	71		30	42.2535	19.93	0.00705	1224		0.00705	254		24	33.8028	13.51	0.00224	914		0.00224	162		2	2.8169	2.33	0.68186	3771		0.68186	1826		2	2.8169	1.21	0.34145	2124		0.34145	909		34	47.8873	20.21	0.00039	685		0.00039	92		31
GO:1903363	negative regulation of cellular protein catabolic process	75		28	37.3333	21.05	0.05112	2052		0.00706	255		19	25.3333	14.27	0.1087	2412		0.10404	969		3	4	2.46	0.44853	2984		1	2483		3	4	1.28	0.13573	1166		1	1462		28	37.3333	21.35	0.0599	2133		0.00769	276		27
GO:0051279	regulation of release of sequestered calcium ion into cytosol	55		21	38.1818	15.44	0.067	2240		0.00708	256		18	32.7273	10.47	0.01093	1290		0.10369	966		1	1.81818	1.8	0.84105	4207		0.84105	2003		4	7.27273	0.94	0.01417	421		1	1463		19	34.5455	15.66	0.19566	3104		0.01604	374		20
GO:0042730	fibrinolysis	18		10	55.5556	5.05	0.01292	1444		0.00709	257		8	44.4444	3.43	0.01205	1309		0.0267	452		3	16.6667	0.59	0.01985	661		0.04048	242		3	16.6667	0.31	0.00329	243		0.15662	501		10	55.5556	5.12	0.01432	1389		0.00771	277		9
GO:0043496	regulation of protein homodimerization activity	20		10	50	5.61	0.0309	1816		0.00709	258		8	40	3.81	0.02427	1561		0.02672	453		2	10	0.66	0.13867	1363		0.28342	1031		1	5	0.34	0.29089	1923		0.29089	827		10	50	5.69	0.03392	1807		0.00772	279		9
GO:1990440	positive regulation of transcription from RNA polymerase II promoter in response to endoplasmic reticulum stress	10		7	70	2.81	0.00709	1225		0.00709	259		5	50	1.9	0.02677	1591		0.02677	459		1	10	0.33	0.2838	2248		0.2838	1039		1	10	0.17	0.15786	1284		0.15786	508		7	70	2.85	0.00772	1201		0.00772	280		7
GO:0031665	negative regulation of lipopolysaccharide-mediated signaling pathway	10		7	70	2.81	0.00709	1226		0.00709	260		5	50	1.9	0.02677	1593		0.02677	461		1	10	0.33	0.2838	2270		0.2838	1040		0	0	0.17	1	5263		1	1464		8	80	2.85	0.00108	821		0.00108	145		7
GO:0060397	JAK-STAT cascade involved in growth hormone signaling pathway	10		7	70	2.81	0.00709	1227		0.00709	261		5	50	1.9	0.02677	1594		0.02677	462		1	10	0.33	0.2838	2273		0.2838	1041		0	0	0.17	1	6776		1	1465		7	70	2.85	0.00772	1202		0.00772	281		7
GO:0019370	leukotriene biosynthetic process	10		7	70	2.81	0.00709	1228		0.00709	262		5	50	1.9	0.02677	1595		0.02677	463		0	0	0.33	1	5652		1	2267		1	10	0.17	0.15786	1296		0.15786	509		7	70	2.85	0.00772	1204		0.00772	282		7
GO:0071872	cellular response to epinephrine stimulus	10		7	70	2.81	0.00709	1229		0.00709	263		3	30	1.9	0.29315	3506		0.29315	1920		1	10	0.33	0.2838	2263		0.2838	1052		0	0	0.17	1	7214		1	1466		6	60	2.85	0.03694	1844		0.03694	573		6
GO:0042953	lipoprotein transport	10		7	70	2.81	0.00709	1230		0.00709	264		6	60	1.9	0.0049	1054		0.0049	223		1	10	0.33	0.2838	2274		0.2838	1035		0	0	0.17	1	5909		1	1467		7	70	2.85	0.00772	1205		0.00772	283		7
GO:1903054	negative regulation of extracellular matrix organization	10		7	70	2.81	0.00709	1231		0.00709	265		6	60	1.9	0.0049	1055		0.0049	224		1	10	0.33	0.2838	2253		0.2838	1036		2	20	0.17	0.01187	392		0.01187	83		7	70	2.85	0.00772	1206		0.00772	284		6
GO:0010642	negative regulation of platelet-derived growth factor receptor signaling pathway	10		7	70	2.81	0.00709	1232		0.00709	266		3	30	1.9	0.29315	3520		0.29315	1934		0	0	0.33	1	5404		1	2980		0	0	0.17	1	4678		1	1468		6	60	2.85	0.03694	1849		0.03694	574		5
GO:0002031	G protein-coupled receptor internalization	10		7	70	2.81	0.00709	1233		0.00709	267		2	20	1.9	0.59436	4845		0.59436	3273		1	10	0.33	0.2838	2235		0.2838	1068		0	0	0.17	1	3915		1	1469		5	50	2.85	0.12516	2613		0.12516	1158		6
GO:0016045	detection of bacterium	10		7	70	2.81	0.00709	1234		0.00709	268		6	60	1.9	0.0049	1056		0.0049	225		2	20	0.33	0.04061	866		0.04061	244		1	10	0.17	0.15786	1279		0.15786	510		7	70	2.85	0.00772	1208		0.00772	285		7
GO:0035690	cellular response to drug	281		101	35.9431	78.88	0.00224	949		0.0071	269		72	25.6228	53.48	0.00366	1003		0.0267	451		12	4.27046	9.22	0.21392	1866		0.34175	1220		7	2.4911	4.78	0.20371	1550		0.20371	657		103	36.6548	79.99	0.00161	874		0.00343	210		98
GO:0006906	vesicle fusion	81		43	53.0864	22.74	1.7e-06	344		0.00741	270		29	35.8025	15.42	0.00028	631		0.02867	506		8	9.87654	2.66	0.005	408		0.71429	1873		4	4.93827	1.38	0.04932	663		0.51892	1103		42	51.8519	23.06	7.5e-06	397		0.00196	169		42
GO:0031398	positive regulation of protein ubiquitination	101		38	37.6238	28.35	0.02319	1687		0.00761	271		25	24.7525	19.22	0.09247	2314		0.17016	1259		7	6.93069	3.31	0.04826	917		0.08664	376		1	0.990099	1.72	0.82473	3381		0.82473	1302		36	35.6436	28.75	0.06979	2220		0.06307	779		37
GO:0002696	positive regulation of leukocyte activation	272		113	41.5441	76.36	9.8e-07	318		0.00765	272		87	31.9853	51.77	1.8e-07	258		0.01346	327		20	7.35294	8.93	0.00066	275		0.47814	1501		9	3.30882	4.63	0.0434	629		1	1470		117	43.0147	77.43	1.6e-07	246		0.00815	291		111
GO:0008630	intrinsic apoptotic signaling pathway in response to DNA damage	95		37	38.9474	26.67	0.01396	1469		0.00782	273		29	30.5263	18.08	0.00468	1041		0.00101	120		2	2.10526	3.12	0.82366	4175		1	2169		2	2.10526	1.62	0.48317	2611		0.60468	1168		37	38.9474	27.04	0.01744	1461		0.00909	329		37
GO:0000186	activation of MAPKK activity	45		22	48.8889	12.63	0.0024	958		0.00785	274		12	26.6667	8.56	0.13335	2595		0.50823	2929		8	17.7778	1.48	9.3e-05	175		0.00522	81		1	2.22222	0.77	0.53892	2759		0.53892	1119		19	42.2222	12.81	0.03312	1804		0.09456	1002		21
GO:0060055	angiogenesis involved in wound healing	16		10	62.5	4.49	0.0042	1083		0.00788	275		7	43.75	3.05	0.02052	1503		0.04768	600		1	6.25	0.53	0.41386	2880		1	2327		0	0	0.27	1	6703		1	1471		11	68.75	4.55	0.00096	808		0.00848	294		10
GO:0008643	carbohydrate transport	115		42	36.5217	32.28	0.02956	1800		0.00788	276		25	21.7391	21.89	0.26173	3360		0.8172	4494		3	2.6087	3.77	0.73299	3935		1	4554		0	0	1.96	1	4509		1	1472		43	37.3913	32.74	0.02339	1625		0.00888	328		40
GO:0051646	mitochondrion localization	39		16	41.0256	10.95	0.05573	2100		0.00789	277		7	17.9487	7.42	0.63265	4995		0.18244	1362		1	2.5641	1.28	0.72837	3919		1	2658		0	0	0.66	1	6590		1	1473		17	43.5897	11.1	0.03093	1782		0.00849	295		13
GO:0002480	antigen processing and presentation of exogenous peptide antigen via MHC class I, TAP-independent	8		6	75	2.25	0.0079	1273		0.0079	278		7	87.5	1.52	6e-05	490		6e-05	54		0	0	0.26	1	4891		1	2159		0	0	0.14	1	3985		1	1474		6	75	2.28	0.00852	1240		0.00852	300		6
GO:0002887	negative regulation of myeloid leukocyte mediated immunity	8		6	75	2.25	0.0079	1274		0.0079	279		4	50	1.52	0.04778	1855		0.04778	605		1	12.5	0.26	0.23434	1965		0.23434	877		1	12.5	0.14	0.12841	1102		0.12841	409		6	75	2.28	0.00852	1242		0.00852	301		6
GO:0002523	leukocyte migration involved in inflammatory response	8		6	75	2.25	0.0079	1275		0.0079	280		5	62.5	1.52	0.00834	1206		0.00834	280		0	0	0.26	1	4893		1	2213		0	0	0.14	1	3989		1	1475		7	87.5	2.28	0.00091	794		0.00091	130		6
GO:0002679	respiratory burst involved in defense response	8		6	75	2.25	0.0079	1276		0.0079	281		2	25	1.52	0.46799	4344		0.46799	2740		1	12.5	0.26	0.23434	1977		0.23434	898		0	0	0.14	1	4016		1	1476		7	87.5	2.28	0.00091	795		0.00091	131		6
GO:0140052	cellular response to oxidised low-density lipoprotein particle stimulus	8		6	75	2.25	0.0079	1277		0.0079	282		6	75	1.52	0.00093	758		0.00093	115		NA	NA	NA	NA	NA		NA	NA		0	0	0.14	1	7619		1	1477		6	75	2.28	0.00852	1243		0.00852	302		7
GO:0048227	plasma membrane to endosome transport	8		6	75	2.25	0.0079	1278		0.0079	283		6	75	1.52	0.00093	761		0.00093	118		1	12.5	0.26	0.23434	1969		0.23434	866		0	0	0.14	1	6355		1	1478		6	75	2.28	0.00852	1244		0.00852	303		6
GO:0046598	positive regulation of viral entry into host cell	8		6	75	2.25	0.0079	1279		0.0079	284		5	62.5	1.52	0.00834	1207		0.00834	281		1	12.5	0.26	0.23434	1986		0.23434	871		1	12.5	0.14	0.12841	1127		0.12841	410		6	75	2.28	0.00852	1245		0.00852	304		6
GO:0044351	macropinocytosis	8		6	75	2.25	0.0079	1280		0.0079	285		4	50	1.52	0.04778	1858		0.04778	608		0	0	0.26	1	6500		1	2332		0	0	0.14	1	6033		1	1479		5	62.5	2.28	0.0468	1945		0.0468	621		6
GO:0001765	membrane raft assembly	8		6	75	2.25	0.0079	1281		0.0079	286		5	62.5	1.52	0.00834	1213		0.00834	287		0	0	0.26	1	4824		1	2215		0	0	0.14	1	3863		1	1480		6	75	2.28	0.00852	1247		0.00852	305		6
GO:0038113	interleukin-9-mediated signaling pathway	8		6	75	2.25	0.0079	1282		0.0079	287		6	75	1.52	0.00093	762		0.00093	119		1	12.5	0.26	0.23434	1963		0.23434	867		0	0	0.14	1	5782		1	1481		6	75	2.28	0.00852	1248		0.00852	306		6
GO:0043031	negative regulation of macrophage activation	8		6	75	2.25	0.0079	1283		0.0079	288		4	50	1.52	0.04778	1863		0.04778	613		1	12.5	0.26	0.23434	1938		0.23434	878		2	25	0.14	0.00755	327		0.00755	69		6	75	2.28	0.00852	1251		0.00852	307		5
GO:1900745	positive regulation of p38MAPK cascade	22		12	54.5455	6.18	0.00796	1292		0.00796	289		7	31.8182	4.19	0.10819	2404		0.10819	994		1	4.54545	0.72	0.52035	3239		0.52035	1575		0	0	0.37	1	7694		1	1482		11	50	6.26	0.02653	1700		0.02653	537		11
GO:0036016	cellular response to interleukin-3	6		5	83.3333	1.68	0.008	1293		0.008	290		5	83.3333	1.14	0.00126	811		0.00126	129		1	16.6667	0.2	0.18147	1593		0.18147	653		1	16.6667	0.1	0.09793	929		0.09793	288		5	83.3333	1.71	0.00854	1259		0.00854	313		5
GO:0070944	neutrophil mediated killing of bacterium	6		5	83.3333	1.68	0.008	1294		0.008	291		1	16.6667	1.14	0.71833	5580		0.71833	3915		1	16.6667	0.2	0.18147	1600		0.18147	718		0	0	0.1	1	7079		1	1483		5	83.3333	1.71	0.00854	1260		0.00854	314		5
GO:1990668	vesicle fusion with endoplasmic reticulum-Golgi intermediate compartment (ERGIC) membrane	6		5	83.3333	1.68	0.008	1295		0.008	292		5	83.3333	1.14	0.00126	812		0.00126	130		2	33.3333	0.2	0.01476	592		0.01476	134		NA	NA	NA	NA	NA		NA	7760		5	83.3333	1.71	0.00854	1261		0.00854	315		5
GO:0046645	positive regulation of gamma-delta T cell activation	6		5	83.3333	1.68	0.008	1296		0.008	293		3	50	1.14	0.08731	2254		0.08731	850		0	0	0.2	1	6704		1	2425		0	0	0.1	1	6297		1	1484		5	83.3333	1.71	0.00854	1262		0.00854	316		5
GO:1905050	positive regulation of metallopeptidase activity	6		5	83.3333	1.68	0.008	1297		0.008	294		5	83.3333	1.14	0.00126	813		0.00126	131		NA	NA	NA	NA	NA		NA	NA		NA	NA	NA	NA	NA		NA	7761		5	83.3333	1.71	0.00854	1263		0.00854	317		5
GO:0060159	regulation of dopamine receptor signaling pathway	6		5	83.3333	1.68	0.008	1298		0.008	295		4	66.6667	1.14	0.01414	1367		0.01414	344		1	16.6667	0.2	0.18147	1654		0.18147	658		0	0	0.1	1	6727		1	1485		4	66.6667	1.71	0.05892	2094		0.05892	701		5
GO:0010046	response to mycotoxin	6		5	83.3333	1.68	0.008	1299		0.008	296		4	66.6667	1.14	0.01414	1368		0.01414	345		0	0	0.2	1	5366		1	2230		2	33.3333	0.1	0.00414	270		0.00414	47		5	83.3333	1.71	0.00854	1264		0.00854	318		4
GO:0061052	negative regulation of cell growth involved in cardiac muscle cell development	6		5	83.3333	1.68	0.008	1300		0.008	297		3	50	1.14	0.08731	2258		0.08731	854		0	0	0.2	1	7190		1	2428		0	0	0.1	1	6890		1	1486		4	66.6667	1.71	0.05892	2095		0.05892	702		5
GO:1900125	regulation of hyaluronan biosynthetic process	6		5	83.3333	1.68	0.008	1301		0.008	298		2	33.3333	1.14	0.32087	3690		0.32087	2068		NA	NA	NA	NA	NA		NA	NA		0	0	0.1	1	7665		1	1487		5	83.3333	1.71	0.00854	1265		0.00854	319		5
GO:1900223	positive regulation of amyloid-beta clearance	6		5	83.3333	1.68	0.008	1302		0.008	299		4	66.6667	1.14	0.01414	1372		0.01414	349		NA	NA	NA	NA	NA		NA	NA		0	0	0.1	1	7670		1	1488		5	83.3333	1.71	0.00854	1266		0.00854	320		4
GO:0001820	serotonin secretion	6		5	83.3333	1.68	0.008	1303		0.008	300		3	50	1.14	0.08731	2265		0.08731	861		0	0	0.2	1	4828		1	2430		0	0	0.1	1	3870		1	1489		6	100	1.71	0.00053	718		0.00053	107		5
GO:1901727	positive regulation of histone deacetylase activity	6		5	83.3333	1.68	0.008	1304		0.008	301		3	50	1.14	0.08731	2272		0.08731	868		1	16.6667	0.2	0.18147	1648		0.18147	676		NA	NA	NA	NA	NA		NA	7762		4	66.6667	1.71	0.05892	2112		0.05892	703		4
GO:0032667	regulation of interleukin-23 production	6		5	83.3333	1.68	0.008	1305		0.008	302		5	83.3333	1.14	0.00126	816		0.00126	134		0	0	0.2	1	5968		1	2172		0	0	0.1	1	5383		1	1490		5	83.3333	1.71	0.00854	1268		0.00854	321		5
GO:1903896	positive regulation of IRE1-mediated unfolded protein response	6		5	83.3333	1.68	0.008	1306		0.008	303		4	66.6667	1.14	0.01414	1380		0.01414	357		1	16.6667	0.2	0.18147	1630		0.18147	663		1	16.6667	0.1	0.09793	928		0.09793	289		5	83.3333	1.71	0.00854	1269		0.00854	322		5
GO:0072683	T cell extravasation	6		5	83.3333	1.68	0.008	1307		0.008	304		6	100	1.14	4.7e-05	471		4.7e-05	50		2	33.3333	0.2	0.01476	591		0.01476	132		2	33.3333	0.1	0.00414	269		0.00414	48		5	83.3333	1.71	0.00854	1270		0.00854	323		5
GO:0070358	actin polymerization-dependent cell motility	6		5	83.3333	1.68	0.008	1308		0.008	305		3	50	1.14	0.08731	2283		0.08731	879		0	0	0.2	1	7289		1	2437		0	0	0.1	1	7017		1	1491		4	66.6667	1.71	0.05892	2123		0.05892	704		5
GO:0016579	protein deubiquitination	245		89	36.3265	68.78	0.0028	1018		0.0084	306		61	24.898	46.63	0.01322	1336		0.0024	176		5	2.04082	8.04	0.90851	4413		0.89654	2054		3	1.22449	4.17	0.79128	3312		0.89413	1333		95	38.7755	69.75	0.00029	651		0.00019	71		87
GO:0070613	regulation of protein processing	82		40	48.7805	23.02	5.3e-05	537		0.00864	307		32	39.0244	15.61	1.9e-05	417		0.04401	585		10	12.1951	2.69	0.00034	232		0.00112	49		6	7.31707	1.4	0.00272	226		0.00154	31		41	50	23.34	3e-05	486		0.00989	330		40
GO:0051603	proteolysis involved in cellular protein catabolic process	631		221	35.0238	177.14	5.6e-05	540		0.00881	308		158	25.0396	120.1	8.1e-05	517		0.01109	316		26	4.12044	20.71	0.13707	1359		0.00822	96		12	1.90174	10.74	0.38915	2312		0.01431	92		234	37.084	179.63	9.7e-07	298		0.00306	200		211
GO:0040017	positive regulation of locomotion	429		161	37.5291	120.43	1e-05	423		0.00891	309		108	25.1748	81.65	0.00086	747		0.00287	188		20	4.662	14.08	0.07289	1059		1	2182		11	2.5641	7.3	0.11604	1065		1	1492		156	36.3636	122.13	0.00019	629		0.09987	1025		159
GO:2000377	regulation of reactive oxygen species metabolic process	146		78	53.4247	40.99	8.3e-11	134		0.00899	310		65	44.5205	27.79	1.3e-12	107		0.04636	590		5	3.42466	4.79	0.52537	3272		0.86923	2027		3	2.05479	2.49	0.45437	2528		1	1493		81	55.4795	41.56	5.9e-12	111		0.00037	87		77
GO:0019882	antigen processing and presentation	161		82	50.9317	45.2	6.2e-10	158		0.00899	311		60	37.2671	30.64	4.1e-08	209		0.00285	187		12	7.45342	5.28	0.00681	451		0.5305	1596		5	3.10559	2.74	0.14046	1181		0.32452	879		82	50.9317	45.83	1.3e-09	149		0.00994	331		80
GO:0051056	regulation of small GTPase mediated signal transduction	277		92	33.213	77.76	0.03316	1834		0.00903	312		39	14.0794	52.72	0.98836	7439		0.53779	3040		8	2.88809	9.09	0.69319	3804		0.05457	280		4	1.44404	4.72	0.69815	3146		0.73976	1262		83	29.9639	78.85	0.30941	3638		0.09365	998		93
GO:0031640	killing of cells of other organism	32		22	68.75	8.98	2e-06	355		0.00943	313		11	34.375	6.09	0.02938	1680		0.13957	1107		4	12.5	1.05	0.01989	666		0.08465	364		1	3.125	0.54	0.42319	2418		0.42319	1009		22	68.75	9.11	2.6e-06	338		0.0104	332		22
GO:0046597	negative regulation of viral entry into host cell	15		9	60	4.21	0.00958	1342		0.00958	314		8	53.3333	2.85	0.00304	973		0.00304	194		1	6.66667	0.49	0.39395	2794		0.39395	1327		3	20	0.26	0.0019	203		0.0019	32		10	66.6667	4.27	0.00236	938		0.00236	175		9
GO:0051044	positive regulation of membrane protein ectodomain proteolysis	15		9	60	4.21	0.00958	1343		0.00958	315		7	46.6667	2.85	0.01376	1349		0.01376	330		2	13.3333	0.49	0.08515	1140		0.08515	366		1	6.66667	0.26	0.22722	1641		0.22722	692		10	66.6667	4.27	0.00236	939		0.00236	176		9
GO:0030214	hyaluronan catabolic process	15		9	60	4.21	0.00958	1344		0.00958	316		5	33.3333	2.85	0.14008	2631		0.14008	1118		1	6.66667	0.49	0.39395	2778		0.39395	1335		1	6.66667	0.26	0.22722	1646		0.22722	693		11	73.3333	4.27	0.0004	687		0.0004	95		10
GO:0006749	glutathione metabolic process	40		19	47.5	11.23	0.0069	1215		0.00968	317		18	45	7.61	0.00015	570		4.2e-05	47		4	10	1.31	0.04125	876		0.04715	262		3	7.5	0.68	0.03032	540		0.3471	911		19	47.5	11.39	0.00811	1223		0.01096	337		19
GO:0044364	disruption of cells of other organism	32		22	68.75	8.98	2e-06	356		0.00996	318		11	34.375	6.09	0.02938	1681		0.16452	1192		4	12.5	1.05	0.01989	665		0.02632	189		1	3.125	0.54	0.42319	2417		0.42319	1010		22	68.75	9.11	2.6e-06	339		0.01114	339		22
GO:0051260	protein homooligomerization	265		101	38.1132	74.39	0.00022	641		0.01009	319		80	30.1887	50.44	6.9e-06	378		0.0012	125		17	6.41509	8.7	0.00659	444		0.02623	187		8	3.01887	4.51	0.0837	866		0.09554	279		98	36.9811	75.44	0.0015	867		0.01386	356		99
GO:0051930	regulation of sensory perception of pain	20		11	55	5.61	0.01013	1365		0.01013	320		5	25	3.81	0.3284	3784		0.3284	2136		1	5	0.66	0.48719	3130		0.48719	1519		0	0	0.34	1	6625		1	1494		11	55	5.69	0.01133	1332		0.01133	342		11
GO:0032727	positive regulation of interferon-alpha production	20		11	55	5.61	0.01013	1366		0.01013	321		9	45	3.81	0.00711	1153		0.00711	266		8	40	0.66	1.1e-07	83		1.1e-07	11		2	10	0.34	0.04485	633		0.04485	157		12	60	5.69	0.00316	1005		0.00316	207		12
GO:0016601	Rac protein signal transduction	33		14	42.4242	9.26	0.05403	2086		0.01015	322		8	24.2424	6.28	0.28327	3441		0.06948	739		0	0	1.08	1	5599		1	2373		1	3.0303	0.56	0.43304	2473		1	1495		12	36.3636	9.39	0.20536	3130		0.08571	980		14
GO:0006888	ER to Golgi vesicle-mediated transport	189		82	43.3862	53.06	4.1e-06	379		0.01026	323		50	26.455	35.97	0.00733	1163		0.13209	1092		13	6.87831	6.2	0.00954	497		0.20487	761		2	1.0582	3.22	0.8357	3411		1	1496		87	46.0317	53.8	1.8e-07	250		0.0007	114		78
GO:0043066	negative regulation of apoptotic process	710		254	35.7746	199.32	2.6e-06	362		0.01055	324		182	25.6338	135.13	5.3e-06	361		0.00563	250		24	3.38028	23.3	0.47076	3092		0.77473	1954		19	2.67606	12.09	0.03414	562		0.09265	275		253	35.6338	202.12	1.2e-05	423		0.06201	759		248
GO:0034097	response to cytokine	919		404	43.9608	257.99	8.4e-27	40		0.01115	325		318	34.6028	174.91	< 1e-30	34		0.00073	105		84	9.14037	30.16	2.6e-18	21		0.56608	1664		55	5.98477	15.65	6.4e-17	17		0.34119	908		389	42.3286	261.62	7.3e-21	49		0.01341	355		393
GO:0006900	vesicle budding from membrane	95		51	53.6842	26.67	1.2e-07	258		0.01153	326		31	32.6316	18.08	0.00109	790		0.00513	229		9	9.47368	3.12	0.00394	393		0.34847	1227		2	2.10526	1.62	0.48317	2612		1	1497		51	53.6842	27.04	2e-07	254		0.01262	345		49
GO:0010950	positive regulation of endopeptidase activity	143		64	44.7552	40.14	1.4e-05	434		0.01154	327		58	40.5594	27.22	1.8e-09	163		0.00081	107		11	7.69231	4.69	0.00747	464		0.34816	1226		6	4.1958	2.43	0.03557	569		0.27543	804		63	44.0559	40.71	4.6e-05	511		0.01266	346		63
GO:0050868	negative regulation of T cell activation	94		40	42.5532	26.39	0.00176	900		0.01176	328		32	34.0426	17.89	0.0004	667		0.22057	1544		7	7.44681	3.08	0.03477	830		0.34981	1228		3	3.19149	1.6	0.21551	1619		1	1498		38	40.4255	26.76	0.00823	1225		0.01291	349		38
GO:0030225	macrophage differentiation	36		20	55.5556	10.11	0.00048	728		0.01183	329		11	30.5556	6.85	0.06612	2052		0.22286	1553		4	11.1111	1.18	0.02942	781		0.06566	326		2	5.55556	0.61	0.12489	1087		0.25267	746		18	50	10.25	0.00507	1093		0.04756	642		17
GO:0097178	ruffle assembly	39		19	48.7179	10.95	0.00489	1124		0.01187	330		10	25.641	7.42	0.19452	2939		0.22322	1558		3	7.69231	1.28	0.13523	1354		0.06597	327		0	0	0.66	1	7481		1	1499		18	46.1538	11.1	0.014	1383		0.04761	644		20
GO:0071243	cellular response to arsenic-containing substance	18		11	61.1111	5.05	0.00343	1049		0.01192	331		7	38.8889	3.43	0.04022	1784		0.0238	435		1	5.55556	0.59	0.45175	2994		0.45175	1448		2	11.1111	0.31	0.03692	583		0.03692	141		11	61.1111	5.12	0.00387	1038		0.01303	351		10
GO:0042246	tissue regeneration	39		16	41.0256	10.95	0.05573	2101		0.01194	332		9	23.0769	7.42	0.31795	3630		0.22344	1561		1	2.5641	1.28	0.72837	3904		0.72837	1898		0	0	0.66	1	5822		1	1500		16	41.0256	11.1	0.06244	2183		0.01305	352		14
GO:0050892	intestinal absorption	22		11	50	6.18	0.02395	1691		0.01194	333		5	22.7273	4.19	0.41103	4168		0.46226	2648		2	9.09091	0.72	0.1617	1521		0.1617	616		0	0	0.37	1	6492		1	1501		12	54.5455	6.26	0.00897	1290		0.00269	184		10
GO:0016236	macroautophagy	268		124	46.2687	75.23	1.2e-10	139		0.01195	334		88	32.8358	51.01	4e-08	208		0.03226	514		11	4.10448	8.8	0.26612	2166		1	2287		3	1.1194	4.56	0.83871	3413		1	1502		130	48.5075	76.29	1.9e-12	106		0.00606	244		123
GO:0030949	positive regulation of vascular endothelial growth factor receptor signaling pathway	13		8	61.5385	3.65	0.01195	1417		0.01195	335		2	15.3846	2.47	0.73946	5781		0.73946	4083		0	0	0.43	1	5804		1	4288		0	0	0.22	1	5180		1	1503		7	53.8462	3.7	0.04785	1978		0.04785	649		8
GO:1900029	positive regulation of ruffle assembly	13		8	61.5385	3.65	0.01195	1418		0.01195	336		4	30.7692	2.47	0.22346	3028		0.22346	1565		1	7.69231	0.43	0.35208	2582		0.35208	1239		0	0	0.22	1	7650		1	1504		6	46.1538	3.7	0.13535	2657		0.13535	1193		8
GO:0006878	cellular copper ion homeostasis	13		8	61.5385	3.65	0.01195	1419		0.01195	337		6	46.1538	2.47	0.0238	1544		0.0238	441		3	23.0769	0.43	0.00785	473		0.00785	95		3	23.0769	0.22	0.00123	179		0.00123	27		9	69.2308	3.7	0.00269	956		0.00269	185		8
GO:0009167	purine ribonucleoside monophosphate metabolic process	256		100	39.0625	71.87	8.2e-05	566		0.01205	338		97	37.8906	48.72	9.1e-13	102		1.3e-08	14		6	2.34375	8.4	0.84987	4233		1	2154		2	0.78125	4.36	0.93489	3593		0.89703	1334		109	42.5781	72.88	7.6e-07	290		0.00089	124		94
GO:0009150	purine ribonucleotide metabolic process	418		148	35.4067	117.34	0.00054	748		0.01225	339		129	30.8612	79.56	2.5e-09	171		2.8e-08	16		13	3.11005	13.72	0.61903	3574		1	2155		2	0.478469	7.12	0.99426	3720		0.97478	1360		163	38.9952	118.99	1.6e-06	317		0.00038	91		138
GO:0070373	negative regulation of ERK1 and ERK2 cascade	56		24	42.8571	15.72	0.01232	1430		0.01232	340		15	26.7857	10.66	0.0983	2337		0.0983	945		6	10.7143	1.84	0.0098	506		0.0098	104		3	5.35714	0.95	0.06998	752		0.06998	198		23	41.0714	15.94	0.0287	1719		0.0287	540		24
GO:0042098	T cell proliferation	160		65	40.625	44.92	0.00039	706		0.01253	341		53	33.125	30.45	1.5e-05	404		0.01152	318		11	6.875	5.25	0.01643	618		0.44747	1432		7	4.375	2.72	0.0197	476		1	1505		64	40	45.55	0.00105	815		0.04249	602		64
GO:0007032	endosome organization	72		37	51.3889	20.21	2.4e-05	467		0.01253	342		27	37.5	13.7	0.00019	585		0.04271	581		2	2.77778	2.36	0.68927	3779		0.68927	1837		1	1.38889	1.23	0.71062	3164		0.71062	1247		37	51.3889	20.5	3.3e-05	491		0.01462	360		35
GO:0048260	positive regulation of receptor-mediated endocytosis	38		20	52.6316	10.67	0.00119	844		0.01281	343		8	21.0526	7.23	0.43918	4202		0.45684	2627		0	0	1.25	1	6752		1	3361		0	0	0.65	1	6361		1	1506		16	42.1053	10.82	0.04951	2014		0.10936	1118		17
GO:0006687	glycosphingolipid metabolic process	51		21	41.1765	14.32	0.02988	1802		0.01288	344		20	39.2157	9.71	0.00064	718		0.00059	91		5	9.80392	1.67	0.02535	736		0.18393	740		1	1.96078	0.87	0.58423	2871		0.58423	1154		23	45.098	14.52	0.00825	1226		0.01421	357		22
GO:0035722	interleukin-12-mediated signaling pathway	42		19	45.2381	11.79	0.01291	1443		0.01291	345		15	35.7143	7.99	0.00815	1196		0.00815	271		1	2.38095	1.38	0.75432	3985		0.75432	1930		2	4.7619	0.72	0.16005	1333		0.16005	546		19	45.2381	11.96	0.01503	1414		0.01503	362		19
GO:1990774	tumor necrosis factor secretion	18		10	55.5556	5.05	0.01292	1445		0.01292	346		8	44.4444	3.43	0.01205	1306		0.01205	322		4	22.2222	0.59	0.00243	353		0.00243	63		1	5.55556	0.31	0.26607	1827		0.26607	784		10	55.5556	5.12	0.01432	1391		0.01432	358		10
GO:0048678	response to axon injury	54		19	35.1852	15.16	0.15529	2887		0.01295	347		13	24.0741	10.28	0.21573	3008		0.00299	193		3	5.55556	1.77	0.26073	2160		0.26073	999		2	3.7037	0.92	0.23432	1684		0.26567	779		21	38.8889	15.37	0.06359	2194		0.00387	218		20
GO:0043687	post-translational protein modification	301		101	33.5548	84.5	0.02018	1607		0.01314	348		73	24.2525	57.29	0.01365	1343		0.01196	320		12	3.98671	9.88	0.28575	2306		0.28575	1084		6	1.99336	5.13	0.40643	2377		0.40643	989		115	38.206	85.69	0.00014	606		6.4e-05	49		95
GO:1901566	organonitrogen compound biosynthetic process	1583		447	28.2375	444.39	0.44863	4528		0.01358	349		339	21.415	301.28	0.00593	1120		0.08265	790		44	2.77953	51.95	0.90061	4395		0.88327	2039		25	1.57928	26.96	0.68796	3110		0.84788	1313		464	29.3114	450.64	0.22186	3181		0.00557	235		423
GO:0006890	retrograde vesicle-mediated transport, Golgi to ER	83		33	39.759	23.3	0.01402	1471		0.01402	350		21	25.3012	15.8	0.09643	2322		0.09643	941		8	9.63855	2.72	0.00579	424		0.00579	83		1	1.20482	1.41	0.76071	3253		0.76071	1277		36	43.3735	23.63	0.00255	948		0.00255	178		33
GO:0000422	autophagy of mitochondrion	70		36	51.4286	19.65	3e-05	483		0.01416	351		27	38.5714	13.32	0.00011	535		0.00519	230		0	0	2.3	1	4763		1	2194		0	0	1.19	1	3789		1	1507		36	51.4286	19.93	4.1e-05	504		0.00551	233		38
GO:0002224	toll-like receptor signaling pathway	116		62	53.4483	32.56	6.9e-09	201		0.01421	352		50	43.1034	22.08	2e-09	165		0.00136	137		18	15.5172	3.81	4e-08	74		0.04599	261		3	2.58621	1.98	0.3165	2040		1	1508		67	57.7586	33.02	3.5e-11	122		0.00281	190		60
GO:0043062	extracellular structure organization	281		109	38.79	78.88	5.6e-05	541		0.01429	353		66	23.4875	53.48	0.03483	1728		0.07693	781		8	2.84698	9.22	0.70826	3845		0.71045	1868		5	1.77936	4.78	0.52376	2721		0.47103	1056		110	39.1459	79.99	6.3e-05	539		0.00253	177		108
GO:0030449	regulation of complement activation	33		19	57.5758	9.26	0.00036	678		0.01439	354		13	39.3939	6.28	0.00526	1092		0.04451	587		7	21.2121	1.08	8e-05	172		0.00016	27		6	18.1818	0.56	1.7e-05	67		6.6e-05	15		18	54.5455	9.39	0.00145	864		0.01625	376		19
GO:0006955	immune response	1636		799	48.8386	459.27	< 1e-30	1		0.01445	355		619	37.8362	311.37	< 1e-30	1		0.0006	92		148	9.04645	53.69	< 1e-30	7		0.02979	207		83	5.07335	27.86	1.5e-21	12		0.01698	99		795	48.5941	465.73	< 1e-30	1		0.04812	655		779
GO:0006801	superoxide metabolic process	53		32	60.3774	14.88	8.7e-07	309		0.01449	356		26	49.0566	10.09	7.4e-07	298		0.04067	573		4	7.54717	1.74	0.09548	1196		1	2316		0	0	0.9	1	4364		1	1509		31	58.4906	15.09	4.6e-06	367		0.06106	749		32
GO:0051924	regulation of calcium ion transport	169		63	37.2781	47.44	0.00561	1163		0.01453	357		48	28.4024	32.16	0.0019	893		0.13803	1104		8	4.73373	5.55	0.19195	1722		0.43155	1395		10	5.91716	2.88	0.00063	151		1	1510		63	37.2781	48.11	0.00781	1214		0.01575	364		62
GO:0010591	regulation of lamellipodium assembly	28		16	57.1429	7.86	0.00116	840		0.0147	358		10	35.7143	5.33	0.02844	1661		0.34951	2334		1	3.57143	0.92	0.60753	3536		1	3211		0	0	0.48	1	4665		1	1511		15	53.5714	7.97	0.00449	1062		0.06173	752		16
GO:0043032	positive regulation of macrophage activation	18		13	72.2222	5.05	0.00013	602		0.01471	359		11	61.1111	3.43	9.8e-05	529		0.00016	65		2	11.1111	0.59	0.11645	1297		0.30685	1104		0	0	0.31	1	5916		1	1512		13	72.2222	5.12	0.00015	610		0.01593	365		13
GO:0031293	membrane protein intracellular domain proteolysis	18		12	66.6667	5.05	0.00074	781		0.01473	360		9	50	3.43	0.00297	968		0.34928	2331		2	11.1111	0.59	0.11645	1291		0.11645	443		0	0	0.31	1	5227		1	1513		12	66.6667	5.12	0.00085	784		0.06174	753		11
GO:0007035	vacuolar acidification	18		11	61.1111	5.05	0.00343	1050		0.01475	361		9	50	3.43	0.00297	966		0.04135	576		2	11.1111	0.59	0.11645	1290		0.11645	438		1	5.55556	0.31	0.26607	1841		1	1514		12	66.6667	5.12	0.00085	782		0.00296	194		11
GO:0060100	positive regulation of phagocytosis, engulfment	11		7	63.6364	3.09	0.0148	1485		0.0148	362		4	36.3636	2.09	0.14029	2656		0.14029	1132		2	18.1818	0.36	0.04858	926		0.04858	271		0	0	0.19	1	6714		1	1515		7	63.6364	3.13	0.01603	1423		0.01603	369		7
GO:0072488	ammonium transmembrane transport	11		7	63.6364	3.09	0.0148	1486		0.0148	363		3	27.2727	2.09	0.35048	3872		0.35048	2362		0	0	0.36	1	7489		1	3224		0	0	0.19	1	7283		1	1516		7	63.6364	3.13	0.01603	1425		0.01603	370		5
GO:0045653	negative regulation of megakaryocyte differentiation	11		7	63.6364	3.09	0.0148	1487		0.0148	364		3	27.2727	2.09	0.35048	3873		0.35048	2363		0	0	0.36	1	6585		1	3225		0	0	0.19	1	6129		1	1517		7	63.6364	3.13	0.01603	1426		0.01603	371		7
GO:0048489	synaptic vesicle transport	115		41	35.6522	32.28	0.0457	2022		0.01519	365		23	20	21.89	0.43258	4192		0.15175	1158		8	6.95652	3.77	0.03546	838		0.03182	211		5	4.34783	1.96	0.04667	647		0.15213	494		39	33.913	32.74	0.11687	2580		0.01759	383		40
GO:0050728	negative regulation of inflammatory response	98		46	46.9388	27.51	5.2e-05	533		0.01625	366		27	27.551	18.65	0.02497	1571		0.73524	4063		4	4.08163	3.22	0.40201	2829		0.52291	1585		2	2.04082	1.67	0.49958	2662		0.49958	1087		46	46.9388	27.9	7.5e-05	554		0.0348	563		44
GO:0045453	bone resorption	44		23	52.2727	12.35	0.00059	755		0.01631	367		12	27.2727	8.37	0.11703	2462		0.06648	727		2	4.54545	1.44	0.42601	2907		0.4138	1363		0	0	0.75	1	6110		1	1518		22	50	12.53	0.00203	908		0.00465	222		23
GO:0050690	regulation of defense response to virus by virus	29		14	48.2759	8.14	0.01637	1518		0.01637	368		7	24.1379	5.52	0.30783	3581		0.30783	1965		1	3.44828	0.95	0.62044	3577		0.62044	1748		1	3.44828	0.49	0.39262	2317		0.39262	970		10	34.4828	8.26	0.29682	3589		0.29682	2158		14
GO:0034314	Arp2/3 complex-mediated actin nucleation	30		16	53.3333	8.42	0.00306	1033		0.01641	369		13	43.3333	5.71	0.00193	901		0.02037	404		1	3.33333	0.98	0.63292	3606		0.63292	1764		1	3.33333	0.51	0.40299	2355		0.40299	983		16	53.3333	8.54	0.00357	1026		0.01802	384		16
GO:0035994	response to muscle stretch	16		9	56.25	4.49	0.0165	1521		0.0165	370		3	18.75	3.05	0.61148	4917		0.61148	3317		0	0	0.53	1	6250		1	3801		1	6.25	0.27	0.24039	1707		0.24039	721		8	50	4.55	0.05612	2051		0.05612	676		9
GO:1902236	negative regulation of endoplasmic reticulum stress-induced intrinsic apoptotic signaling pathway	16		9	56.25	4.49	0.0165	1522		0.0165	371		8	50	3.05	0.00508	1070		0.00508	227		3	18.75	0.53	0.0143	573		0.0143	124		NA	NA	NA	NA	NA		NA	7763		10	62.5	4.55	0.00469	1075		0.00469	223		9
GO:2000310	regulation of NMDA receptor activity	16		9	56.25	4.49	0.0165	1523		0.0165	372		6	37.5	3.05	0.06656	2060		0.06656	730		NA	NA	NA	NA	NA		NA	NA		1	6.25	0.27	0.24039	1693		0.24039	722		8	50	4.55	0.05612	2053		0.05612	677		9
GO:0042832	defense response to protozoan	16		9	56.25	4.49	0.0165	1524		0.0165	373		7	43.75	3.05	0.02052	1501		0.02052	405		2	12.5	0.53	0.09527	1185		0.09527	410		1	6.25	0.27	0.24039	1692		0.24039	723		10	62.5	4.55	0.00469	1076		0.00469	224		9
GO:0032717	negative regulation of interleukin-8 production	16		9	56.25	4.49	0.0165	1525		0.0165	374		3	18.75	3.05	0.61148	4930		0.61148	3330		0	0	0.53	1	5974		1	3809		0	0	0.27	1	5393		1	1519		8	50	4.55	0.05612	2055		0.05612	678		9
GO:0008584	male gonad development	98		37	37.7551	27.51	0.02348	1689		0.01651	375		21	21.4286	18.65	0.30946	3593		0.2646	1849		5	5.10204	3.22	0.21932	1873		0.28184	1016		1	1.02041	1.67	0.81539	3361		0.81539	1297		34	34.6939	27.9	0.10548	2448		0.06192	757		33
GO:0071466	cellular response to xenobiotic stimulus	114		41	35.9649	32	0.03995	1924		0.01705	376		32	28.0702	21.7	0.01191	1304		0.01023	312		1	0.877193	3.74	0.97809	4587		0.97809	2127		5	4.38596	1.94	0.04524	640		0.03617	139		42	36.8421	32.45	0.03184	1790		0.00884	327		39
GO:1901222	regulation of NIK/NF-kappaB signaling	89		43	48.3146	24.98	3.8e-05	505		0.01772	377		29	32.5843	16.94	0.00159	857		0.01559	374		4	4.49438	2.92	0.33461	2551		1	2239		3	3.37079	1.52	0.19355	1491		1	1520		40	44.9438	25.34	0.00065	749		0.00302	198		41
GO:2000107	negative regulation of leukocyte apoptotic process	43		20	46.5116	12.07	0.00754	1247		0.01797	378		15	34.8837	8.18	0.01036	1272		0.01574	377		4	9.30233	1.41	0.05165	947		0.25847	944		2	4.65116	0.73	0.16608	1342		0.47839	1060		19	44.186	12.24	0.01989	1527		0.01932	388		19
GO:0051290	protein heterotetramerization	32		15	46.875	8.98	0.01798	1558		0.01798	379		8	25	6.09	0.25368	3336		0.25368	1836		0	0	1.05	1	6904		1	2937		0	0	0.54	1	6536		1	1521		16	50	9.11	0.00806	1217		0.00806	288		14
GO:0006891	intra-Golgi vesicle-mediated transport	32		15	46.875	8.98	0.01798	1559		0.01798	380		8	25	6.09	0.25368	3337		0.25368	1837		2	6.25	1.05	0.28297	2223		0.28297	1024		2	6.25	0.54	0.10267	982		0.10267	341		16	50	9.11	0.00806	1218		0.00806	289		14
GO:0071354	cellular response to interleukin-6	25		13	52	7.02	0.00972	1351		0.01802	381		6	24	4.76	0.33622	3807		0.23653	1635		1	4	0.82	0.56612	3401		1	2823		0	0	0.43	1	7134		1	1522		11	44	7.12	0.07053	2223		0.08093	908		12
GO:1902188	positive regulation of viral release from host cell	14		8	57.1429	3.93	0.0211	1633		0.01807	382		8	57.1429	2.66	0.0017	868		0.00233	165		NA	NA	NA	NA	NA		NA	NA		NA	NA	NA	NA	NA		NA	7764		7	50	3.99	0.07274	2236		0.081	928		8
GO:0042994	cytoplasmic sequestering of transcription factor	15		8	53.3333	4.21	0.03426	1840		0.01808	383		5	33.3333	2.85	0.14008	2635		0.23635	1603		0	0	0.49	1	6406		1	2806		0	0	0.26	1	5914		1	1523		7	46.6667	4.27	0.10391	2423		0.08103	940		8
GO:0006527	arginine catabolic process	9		6	66.6667	2.53	0.01808	1564		0.01808	384		4	44.4444	1.71	0.07333	2113		0.07333	756		0	0	0.3	1	5109		1	2381		0	0	0.15	1	4287		1	1524		6	66.6667	2.56	0.01941	1498		0.01941	393		6
GO:0051601	exocyst localization	9		6	66.6667	2.53	0.01808	1565		0.01808	385		4	44.4444	1.71	0.07333	2114		0.07333	757		2	22.2222	0.3	0.0332	807		0.0332	225		2	22.2222	0.15	0.0096	360		0.0096	78		7	77.7778	2.56	0.00307	1000		0.00307	204		6
GO:0000050	urea cycle	9		6	66.6667	2.53	0.01808	1566		0.01808	386		4	44.4444	1.71	0.07333	2116		0.07333	759		0	0	0.3	1	4736		1	2383		0	0	0.15	1	3748		1	1525		6	66.6667	2.56	0.01941	1499		0.01941	394		6
GO:0016139	glycoside catabolic process	9		6	66.6667	2.53	0.01808	1567		0.01808	387		4	44.4444	1.71	0.07333	2119		0.07333	762		1	11.1111	0.3	0.25948	2108		0.25948	958		0	0	0.15	1	4888		1	1526		6	66.6667	2.56	0.01941	1502		0.01941	395		7
GO:0071225	cellular response to muramyl dipeptide	9		6	66.6667	2.53	0.01808	1568		0.01808	388		4	44.4444	1.71	0.07333	2121		0.07333	764		1	11.1111	0.3	0.25948	2098		0.25948	960		0	0	0.15	1	7110		1	1527		6	66.6667	2.56	0.01941	1503		0.01941	396		6
GO:0046512	sphingosine biosynthetic process	9		6	66.6667	2.53	0.01808	1569		0.01808	389		4	44.4444	1.71	0.07333	2122		0.07333	765		1	11.1111	0.3	0.25948	2116		0.25948	961		1	11.1111	0.15	0.14326	1214		0.14326	462		6	66.6667	2.56	0.01941	1504		0.01941	397		6
GO:0060700	regulation of ribonuclease activity	9		6	66.6667	2.53	0.01808	1570		0.01808	390		6	66.6667	1.71	0.00234	924		0.00234	170		4	44.4444	0.3	0.00013	191		0.00013	23		4	44.4444	0.15	9.6e-06	63		9.6e-06	11		4	44.4444	2.56	0.23605	3366		0.23605	1806		6
GO:0032464	positive regulation of protein homooligomerization	9		6	66.6667	2.53	0.01808	1571		0.01808	391		6	66.6667	1.71	0.00234	926		0.00234	172		0	0	0.3	1	5947		1	2179		0	0	0.15	1	5362		1	1528		6	66.6667	2.56	0.01941	1506		0.01941	398		5
GO:2001269	positive regulation of cysteine-type endopeptidase activity involved in apoptotic signaling pathway	9		6	66.6667	2.53	0.01808	1572		0.01808	392		5	55.5556	1.71	0.01584	1434		0.01584	383		NA	NA	NA	NA	NA		NA	NA		1	11.1111	0.15	0.14326	1202		0.14326	463		6	66.6667	2.56	0.01941	1507		0.01941	399		6
GO:0051014	actin filament severing	9		6	66.6667	2.53	0.01808	1573		0.01808	393		3	33.3333	1.71	0.23652	3109		0.23652	1624		0	0	0.3	1	6869		1	2814		1	11.1111	0.15	0.14326	1199		0.14326	464		4	44.4444	2.56	0.23605	3371		0.23605	1807		6
GO:0034145	positive regulation of toll-like receptor 4 signaling pathway	9		6	66.6667	2.53	0.01808	1574		0.01808	394		2	22.2222	1.71	0.53412	4623		0.53412	3012		2	22.2222	0.3	0.0332	803		0.0332	228		1	11.1111	0.15	0.14326	1197		0.14326	465		6	66.6667	2.56	0.01941	1509		0.01941	400		5
GO:0051712	positive regulation of killing of cells of other organism	9		6	66.6667	2.53	0.01808	1575		0.01808	395		4	44.4444	1.71	0.07333	2133		0.07333	776		1	11.1111	0.3	0.25948	2100		0.25948	966		0	0	0.15	1	6602		1	1529		6	66.6667	2.56	0.01941	1510		0.01941	401		6
GO:0047497	mitochondrion transport along microtubule	19		8	42.1053	5.33	0.13522	2741		0.0181	396		3	15.7895	3.62	0.7301	5746		0.7301	4049		0	0	0.62	1	6727		1	4269		0	0	0.32	1	6332		1	1530		7	36.8421	5.41	0.28121	3531		0.08112	969		5
GO:0097237	cellular response to toxic substance	198		74	37.3737	55.58	0.00265	996		0.01831	397		62	31.3131	37.68	2.1e-05	423		0.07657	780		8	4.0404	6.5	0.32506	2454		0.48046	1503		9	4.54545	3.37	0.00685	321		0.27354	802		75	37.8788	56.37	0.00247	942		0.02295	456		72
GO:0070972	protein localization to endoplasmic reticulum	134		26	19.403	37.62	0.99221	7703		0.01847	398		34	25.3731	25.5	0.04195	1817		0.01569	376		3	2.23881	4.4	0.82077	4170		0.26061	998		0	0	2.28	1	7081		1	1531		26	19.403	38.15	0.99408	7798		0.01983	407		26
GO:0006968	cellular defense response	49		21	42.8571	13.76	0.01853	1587		0.01853	399		18	36.7347	9.33	0.00277	954		0.00277	186		2	4.08163	1.61	0.48129	3104		0.48129	1504		2	4.08163	0.83	0.20296	1539		0.20296	655		19	38.7755	13.95	0.07723	2268		0.07723	855		21
GO:0042059	negative regulation of epidermal growth factor receptor signaling pathway	36		17	47.2222	10.11	0.01111	1383		0.01856	400		12	33.3333	6.85	0.02981	1687		0.15576	1161		2	5.55556	1.18	0.3318	2528		0.3318	1212		0	0	0.61	1	5811		1	1532		16	44.4444	10.25	0.0295	1759		0.05249	663		15
GO:1990090	cellular response to nerve growth factor stimulus	39		17	43.5897	10.95	0.02713	1780		0.0186	401		8	20.5128	7.42	0.47046	4419		0.37542	2411		1	2.5641	1.28	0.72837	3926		1	3242		NA	NA	NA	NA	NA		NA	7765		16	41.0256	11.1	0.06244	2184		0.02082	413		17
GO:0001916	positive regulation of T cell mediated cytotoxicity	24		12	50	6.74	0.01863	1589		0.01863	402		12	50	4.57	0.00061	707		0.00061	95		1	4.16667	0.79	0.55137	3351		0.55137	1642		1	4.16667	0.41	0.33805	2098		0.33805	900		12	50	6.83	0.02081	1547		0.02081	411		12
GO:0032689	negative regulation of interferon-gamma production	24		12	50	6.74	0.01863	1590		0.01863	403		11	45.8333	4.57	0.00249	943		0.00249	178		4	16.6667	0.79	0.00722	459		0.00722	91		2	8.33333	0.41	0.06234	719		0.06234	187		12	50	6.83	0.02081	1548		0.02081	412		11
GO:0043086	negative regulation of catalytic activity	599		224	37.3957	168.16	2.6e-07	279		0.01865	404		152	25.3756	114	5.5e-05	482		0.13133	1044		31	5.17529	19.66	0.00819	482		0.37867	1307		12	2.00334	10.2	0.32303	2053		1	1533		225	37.5626	170.52	5.2e-07	283		0.08497	975		218
GO:0042060	wound healing	412		188	45.6311	115.66	9.4e-15	86		0.0191	405		120	29.1262	78.41	3.2e-07	277		0.13356	1093		29	7.03883	13.52	9.4e-05	176		0.83596	1999		9	2.18447	7.02	0.26965	1853		1	1534		186	45.1456	117.29	1.9e-13	95		0.20708	1601		184
GO:0009205	purine ribonucleoside triphosphate metabolic process	249		100	40.1606	69.9	2.2e-05	463		0.01938	406		96	38.5542	47.39	3.6e-13	94		4e-08	17		5	2.00803	8.17	0.91546	4439		1	2156		2	0.803213	4.24	0.92807	3576		0.91172	1339		111	44.5783	70.88	3.4e-08	194		0.00086	122		93
GO:0006879	cellular iron ion homeostasis	58		24	41.3793	16.28	0.01985	1604		0.01985	407		16	27.5862	11.04	0.07186	2105		0.07186	742		2	3.44828	1.9	0.57206	3428		0.57206	1684		1	1.72414	0.99	0.63151	3007		0.63151	1193		25	43.1034	16.51	0.01191	1345		0.01191	344		23
GO:0001961	positive regulation of cytokine-mediated signaling pathway	42		21	50	11.79	0.00211	939		0.02033	408		17	40.4762	7.99	0.00105	786		0.13506	1094		8	19.0476	1.38	5.6e-05	161		0.02241	179		4	9.52381	0.72	0.00552	292		0.10661	347		18	42.8571	11.96	0.03213	1792		0.06212	771		21
GO:0048278	vesicle docking	60		25	41.6667	16.84	0.01607	1512		0.02038	409		19	31.6667	11.42	0.0132	1334		0.00466	215		6	10	1.97	0.01355	560		0.02277	181		2	3.33333	1.02	0.27228	1862		1	1535		27	45	17.08	0.00457	1071		0.00677	264		24
GO:0043900	regulation of multi-organism process	317		144	45.4259	88.99	2e-11	125		0.02039	410		120	37.8549	60.33	1.9e-15	80		0.00011	61		37	11.6719	10.4	1.7e-11	48		5.4e-08	8		28	8.83281	5.4	7.7e-13	31		0.00021	18		145	45.7413	90.24	2.8e-11	121		0.00217	172		140
GO:2000257	regulation of protein activation cascade	34		19	55.8824	9.54	0.0006	756		0.02075	411		13	38.2353	6.47	0.00705	1148		0.05587	693		7	20.5882	1.12	9.7e-05	179		0.0002	30		6	17.6471	0.58	2.1e-05	68		8e-05	16		18	52.9412	9.68	0.00227	926		0.02334	485		19
GO:0000045	autophagosome assembly	88		43	48.8636	24.7	2.7e-05	474		0.02087	412		30	34.0909	16.75	0.00058	702		0.00618	252		5	5.68182	2.89	0.1626	1529		0.25973	993		1	1.13636	1.5	0.78052	3285		0.78052	1285		46	52.2727	25.05	2.1e-06	326		0.0107	335		42
GO:0042326	negative regulation of phosphorylation	366		129	35.2459	102.75	0.00144	872		0.0209	413		84	22.9508	69.66	0.03288	1717		0.39349	2426		17	4.64481	12.01	0.09516	1181		1	3252		8	2.18579	6.23	0.28597	1921		1	1536		133	36.3388	104.19	0.00056	730		0.02216	417		124
GO:0032570	response to progesterone	27		13	48.1481	7.58	0.02094	1623		0.02094	414		10	37.037	5.14	0.02193	1517		0.02193	412		3	11.1111	0.89	0.05735	987		0.05735	291		4	14.8148	0.46	0.00106	171		0.00106	25		15	55.5556	7.69	0.00282	972		0.00282	193		13
GO:0002719	negative regulation of cytokine production involved in immune response	20		10	50	5.61	0.0309	1817		0.02108	415		10	50	3.81	0.00174	878		0.00026	76		1	5	0.66	0.48719	3123		0.48719	1515		1	5	0.34	0.29089	1924		0.29089	828		10	50	5.69	0.03392	1808		0.02295	457		10
GO:0071360	cellular response to exogenous dsRNA	14		8	57.1429	3.93	0.0211	1634		0.0211	416		8	57.1429	2.66	0.0017	865		0.0017	149		4	28.5714	0.46	0.00088	288		0.00088	45		1	7.14286	0.24	0.21382	1575		0.21382	667		8	57.1429	3.99	0.02296	1613		0.02296	460		9
GO:1904706	negative regulation of vascular smooth muscle cell proliferation	14		8	57.1429	3.93	0.0211	1635		0.0211	417		7	50	2.66	0.00876	1233		0.00876	295		1	7.14286	0.46	0.37336	2696		0.37336	1280		NA	NA	NA	NA	NA		NA	7766		9	64.2857	3.99	0.00564	1114		0.00564	240		8
GO:2001039	negative regulation of cellular response to drug	14		8	57.1429	3.93	0.0211	1636		0.0211	418		8	57.1429	2.66	0.0017	866		0.0017	150		2	14.2857	0.46	0.07538	1074		0.07538	347		NA	NA	NA	NA	NA		NA	7767		8	57.1429	3.99	0.02296	1614		0.02296	461		8
GO:0043011	myeloid dendritic cell differentiation	14		8	57.1429	3.93	0.0211	1637		0.0211	419		9	64.2857	2.66	0.00026	622		0.00026	74		1	7.14286	0.46	0.37336	2680		0.37336	1279		1	7.14286	0.24	0.21382	1579		0.21382	668		8	57.1429	3.99	0.02296	1615		0.02296	462		8
GO:0032872	regulation of stress-activated MAPK cascade	196		71	36.2245	55.02	0.00756	1254		0.02117	420		43	21.9388	37.3	0.16983	2785		0.02793	476		12	6.12245	6.43	0.0283	773		1	2273		4	2.04082	3.34	0.4291	2446		1	1537		69	35.2041	55.8	0.02295	1610		0.02259	421		69
GO:0016233	telomere capping	45		14	31.1111	12.63	0.37829	4019		0.02119	421		7	15.5556	8.56	0.77928	6049		0.32932	2144		1	2.22222	1.48	0.7778	4053		1	3079		0	0	0.77	1	4892		1	1538		12	26.6667	12.81	0.66032	5552		0.02314	483		14
GO:0071236	cellular response to antibiotic	119		44	36.9748	33.41	0.02127	1646		0.02127	422		28	23.5294	22.65	0.12867	2517		0.12867	1030		6	5.04202	3.91	0.19662	1727		0.19662	752		3	2.52101	2.03	0.33051	2086		0.33051	892		43	36.1345	33.88	0.04144	1900		0.04144	601		41
GO:0071219	cellular response to molecule of bacterial origin	174		95	54.5977	48.85	1.3e-13	104		0.0213	423		75	43.1034	33.12	2e-13	92		0.09194	897		22	12.6437	5.71	5.8e-08	78		1	2448		10	5.74713	2.96	0.00079	160		1	1539		97	55.7471	49.53	3.2e-14	85		0.0222	418		96
GO:0140029	exocytic process	69		30	43.4783	19.37	0.0043	1089		0.02132	424		21	30.4348	13.13	0.0152	1405		0.13096	1038		7	10.1449	2.26	0.00731	462		1	2508		4	5.7971	1.17	0.02993	536		1	1540		30	43.4783	19.64	0.00536	1105		0.10622	1048		29
GO:0051101	regulation of DNA binding	103		39	37.8641	28.91	0.01945	1602		0.02133	425		29	28.1553	19.6	0.01544	1425		0.13076	1036		3	2.91262	3.38	0.66196	3705		1	2507		2	1.94175	1.75	0.52617	2724		0.52617	1109		41	39.8058	29.32	0.00846	1228		0.02264	423		37
GO:0008284	positive regulation of cell proliferation	676		230	34.0237	189.77	0.0003	658		0.02136	426		164	24.2604	128.66	0.00032	647		0.04625	589		26	3.84615	22.18	0.22671	1909		0.42971	1393		18	2.66272	11.51	0.04025	615		0.28669	822		232	34.3195	192.44	0.00038	680		0.05236	661		217
GO:0060078	regulation of postsynaptic membrane potential	73		27	36.9863	20.49	0.06103	2194		0.02142	427		17	23.2877	13.89	0.21434	3007		0.69602	3774		3	4.10959	2.4	0.43115	2918		0.33008	1205		1	1.36986	1.24	0.71557	3174		1	1541		26	35.6164	20.78	0.11129	2549		0.02281	428		27
GO:1990000	amyloid fibril formation	12		9	75	3.37	0.00099	821		0.02145	428		8	66.6667	2.28	0.0004	672		0.00369	201		NA	NA	NA	NA	NA		NA	NA		2	16.6667	0.2	0.01703	455		0.11285	356		10	83.3333	3.42	0.00013	588		0.02278	427		8
GO:0030853	negative regulation of granulocyte differentiation	7		5	71.4286	1.97	0.02151	1647		0.02151	429		4	57.1429	1.33	0.02806	1623		0.02806	482		1	14.2857	0.23	0.20835	1770		0.20835	777		1	14.2857	0.12	0.1133	1036		0.1133	364		4	57.1429	1.99	0.10698	2458		0.10698	1061		5
GO:0060312	regulation of blood vessel remodeling	7		5	71.4286	1.97	0.02151	1648		0.02151	430		4	57.1429	1.33	0.02806	1628		0.02806	487		0	0	0.23	1	7074		1	2281		1	14.2857	0.12	0.1133	1019		0.1133	365		5	71.4286	1.99	0.02287	1584		0.02287	435		5
GO:0009629	response to gravity	7		5	71.4286	1.97	0.02151	1649		0.02151	431		3	42.8571	1.33	0.13174	2554		0.13174	1067		0	0	0.23	1	5348		1	2527		2	28.5714	0.12	0.00573	298		0.00573	52		5	71.4286	1.99	0.02287	1585		0.02287	436		5
GO:0042541	hemoglobin biosynthetic process	7		5	71.4286	1.97	0.02151	1650		0.02151	432		NA	NA	NA	NA	NA		NA	7960		0	0	0.23	1	6371		1	7502		0	0	0.12	1	5869		1	1542		5	71.4286	1.99	0.02287	1589		0.02287	437		4
GO:0019885	antigen processing and presentation of endogenous peptide antigen via MHC class I	7		5	71.4286	1.97	0.02151	1651		0.02151	433		4	57.1429	1.33	0.02806	1633		0.02806	492		2	28.5714	0.23	0.02022	676		0.02022	165		0	0	0.12	1	5012		1	1543		5	71.4286	1.99	0.02287	1590		0.02287	438		5
GO:1903071	positive regulation of ER-associated ubiquitin-dependent protein catabolic process	7		5	71.4286	1.97	0.02151	1652		0.02151	434		3	42.8571	1.33	0.13174	2564		0.13174	1077		2	28.5714	0.23	0.02022	680		0.02022	169		NA	NA	NA	NA	NA		NA	7768		6	85.7143	1.99	0.00281	968		0.00281	191		5
GO:0045779	negative regulation of bone resorption	7		5	71.4286	1.97	0.02151	1653		0.02151	435		2	28.5714	1.33	0.39652	4036		0.39652	2502		1	14.2857	0.23	0.20835	1808		0.20835	809		0	0	0.12	1	6167		1	1544		5	71.4286	1.99	0.02287	1591		0.02287	439		5
GO:0034154	toll-like receptor 7 signaling pathway	7		5	71.4286	1.97	0.02151	1654		0.02151	436		5	71.4286	1.33	0.00371	1012		0.00371	206		4	57.1429	0.23	3.7e-05	152		3.7e-05	20		1	14.2857	0.12	0.1133	1014		0.1133	366		5	71.4286	1.99	0.02287	1592		0.02287	440		5
GO:0034128	negative regulation of MyD88-independent toll-like receptor signaling pathway	7		5	71.4286	1.97	0.02151	1655		0.02151	437		4	57.1429	1.33	0.02806	1638		0.02806	497		0	0	0.23	1	6103		1	2284		0	0	0.12	1	5532		1	1545		5	71.4286	1.99	0.02287	1593		0.02287	441		5
GO:0045630	positive regulation of T-helper 2 cell differentiation	7		5	71.4286	1.97	0.02151	1656		0.02151	438		5	71.4286	1.33	0.00371	1013		0.00371	207		0	0	0.23	1	6582		1	2188		1	14.2857	0.12	0.1133	1030		0.1133	367		5	71.4286	1.99	0.02287	1595		0.02287	442		5
GO:0002091	negative regulation of receptor internalization	7		5	71.4286	1.97	0.02151	1657		0.02151	439		3	42.8571	1.33	0.13174	2570		0.13174	1083		0	0	0.23	1	4862		1	2534		0	0	0.12	1	3932		1	1546		4	57.1429	1.99	0.10698	2500		0.10698	1062		5
GO:0035333	Notch receptor processing, ligand-dependent	7		5	71.4286	1.97	0.02151	1658		0.02151	440		6	85.7143	1.33	0.00028	630		0.00028	77		0	0	0.23	1	6195		1	2163		0	0	0.12	1	5641		1	1547		6	85.7143	1.99	0.00281	969		0.00281	192		5
GO:0031077	post-embryonic camera-type eye development	7		5	71.4286	1.97	0.02151	1659		0.02151	441		3	42.8571	1.33	0.13174	2574		0.13174	1087		0	0	0.23	1	5819		1	2538		1	14.2857	0.12	0.1133	1021		0.1133	368		5	71.4286	1.99	0.02287	1598		0.02287	443		4
GO:0030223	neutrophil differentiation	7		5	71.4286	1.97	0.02151	1660		0.02151	442		4	57.1429	1.33	0.02806	1641		0.02806	500		0	0	0.23	1	5762		1	2286		0	0	0.12	1	5113		1	1548		4	57.1429	1.99	0.10698	2501		0.10698	1063		5
GO:1990869	cellular response to chemokine	69		18	26.087	19.37	0.68692	5530		0.02163	443		19	27.5362	13.13	0.05403	1967		0.13121	1043		5	7.24638	2.26	0.0758	1092		1	2512		7	10.1449	1.17	0.00017	105		0.11087	350		19	27.5362	19.64	0.61326	5282		0.10723	1115		18
GO:0038094	Fc-gamma receptor signaling pathway	75		47	62.6667	21.05	4.1e-10	152		0.02168	444		34	45.3333	14.27	1.7e-07	257		0.00674	255		7	9.33333	2.46	0.01138	534		1	2202		1	1.33333	1.28	0.72523	3195		1	1549		44	58.6667	21.35	4.3e-08	203		0.02267	424		46
GO:0008154	actin polymerization or depolymerization	177		74	41.8079	49.69	5.4e-05	539		0.0217	445		47	26.5537	33.69	0.00848	1226		0.46724	2698		5	2.82486	5.81	0.69458	3809		1	3405		2	1.12994	3.01	0.80751	3351		1	1550		73	41.2429	50.39	0.00016	619		0.02267	425		74
GO:0035821	modification of morphology or physiology of other organism	122		55	45.082	34.25	4.2e-05	513		0.02177	446		36	29.5082	23.22	0.00333	989		0.09404	902		6	4.91803	4	0.21204	1862		1	2452		4	3.27869	2.08	0.15477	1266		1	1551		55	45.082	34.73	6.4e-05	541		0.02271	426		53
GO:0042590	antigen processing and presentation of exogenous peptide antigen via MHC class I	29		22	75.8621	8.14	1.2e-07	259		0.0219	447		20	68.9655	5.52	6.1e-09	182		0.00679	256		5	17.2414	0.95	0.0023	352		1	2203		2	6.89655	0.49	0.08683	875		0.06623	193		23	79.3103	8.26	1.9e-08	187		0.02282	430		22
GO:0002220	innate immune response activating cell surface receptor signaling pathway	54		27	50	15.16	0.00052	742		0.02193	448		20	37.037	10.28	0.00147	845		0.00683	258		4	7.40741	1.77	0.1006	1220		1	2205		3	5.55556	0.92	0.06415	730		0.04997	171		25	46.2963	15.37	0.00395	1042		0.02292	453		27
GO:0002292	T cell differentiation involved in immune response	62		28	45.1613	17.41	0.00296	1030		0.02196	449		25	40.3226	11.8	8.2e-05	518		0.0068	257		3	4.83871	2.03	0.33284	2544		1	2204		3	4.83871	1.06	0.0888	886		1	1552		27	43.5484	17.65	0.00781	1215		0.02292	454		28
GO:0032270	positive regulation of cellular protein metabolic process	1268		437	34.4637	355.96	9.5e-08	249		0.02198	450		316	24.9211	241.33	2.9e-08	204		0.04639	591		63	4.96845	41.61	0.00052	262		1	2322		28	2.2082	21.59	0.09171	891		0.0801	210		421	33.2019	360.97	5.8e-05	531		0.02374	487		424
GO:0002090	regulation of receptor internalization	34		17	50	9.54	0.00547	1157		0.02201	451		8	23.5294	6.47	0.31369	3597		0.64816	3382		0	0	1.12	1	4861		1	3833		0	0	0.58	1	3931		1	1553		14	41.1765	9.68	0.07622	2262		0.02302	471		15
GO:0036336	dendritic cell migration	24		14	58.3333	6.74	0.00181	912		0.02202	452		8	33.3333	4.57	0.06995	2100		1	6386		3	12.5	0.79	0.04262	885		1	6057		1	4.16667	0.41	0.33805	2113		1	1554		12	50	6.83	0.02081	1552		0.63341	3753		14
GO:0031664	regulation of lipopolysaccharide-mediated signaling pathway	21		13	61.9048	5.9	0.00123	849		0.02202	453		11	52.381	4	0.00062	714		0.00685	260		3	14.2857	0.69	0.03009	789		0.04844	267		2	9.52381	0.36	0.04902	661		0.19948	629		14	66.6667	5.98	0.00031	660		0.02295	458		13
GO:0044247	cellular polysaccharide catabolic process	19		12	63.1579	5.33	0.00149	880		0.02203	454		5	26.3158	3.62	0.28759	3464		0.46908	2833		0	0	0.62	1	6491		1	3486		0	0	0.32	1	6024		1	1555		11	57.8947	5.41	0.00684	1166		0.02299	466		12
GO:1902624	positive regulation of neutrophil migration	23		13	56.5217	6.46	0.00385	1070		0.02203	455		8	34.7826	4.38	0.05558	1979		0.0947	923		NA	NA	NA	NA	NA		NA	NA		2	8.69565	0.39	0.05778	700		1	1556		12	52.1739	6.55	0.01396	1382		0.19655	1534		12
GO:0051873	killing by host of symbiont cells	10		9	90	2.81	8e-05	560		0.02204	456		3	30	1.9	0.29315	3529		0.46913	2842		1	10	0.33	0.2838	2291		1	3494		0	0	0.17	1	6614		1	1557		9	90	2.85	9.1e-05	564		0.02298	465		9
GO:0010594	regulation of endothelial cell migration	122		40	32.7869	34.25	0.1442	2859		0.02204	457		28	22.9508	23.22	0.16034	2748		0.09462	916		2	1.63934	4	0.91332	4436		1	2463		3	2.45902	2.08	0.34451	2133		1	1558		37	30.3279	34.73	0.35609	3872		0.02305	473		39
GO:1905523	positive regulation of macrophage migration	14		9	64.2857	3.93	0.00509	1139		0.02206	458		8	57.1429	2.66	0.0017	871		0.09458	914		2	14.2857	0.46	0.07538	1078		0.09512	402		3	21.4286	0.24	0.00154	192		0.04982	170		9	64.2857	3.99	0.00564	1116		0.023	469		9
GO:0043471	regulation of cellular carbohydrate catabolic process	8		7	87.5	2.25	0.00083	795		0.02206	459		5	62.5	1.52	0.00834	1201		0.00688	261		0	0	0.26	1	6440		1	2207		0	0	0.14	1	5960		1	1559		5	62.5	2.28	0.0468	1938		0.02305	474		7
GO:0051238	sequestering of metal ion	9		5	55.5556	2.53	0.07685	2303		0.0221	460		5	55.5556	1.71	0.01584	1429		0.00688	262		0	0	0.3	1	6898		1	2208		2	22.2222	0.15	0.0096	365		0.05002	172		5	55.5556	2.56	0.08105	2296		0.02305	475		6
GO:0015874	norepinephrine transport	13		6	46.1538	3.65	0.12818	2672		0.02211	461		3	23.0769	2.47	0.46234	4277		0.09492	938		2	15.3846	0.43	0.06601	1036		1	2474		0	0	0.22	1	4863		1	1560		5	38.4615	3.7	0.30035	3601		0.19694	1574		5
GO:1902307	positive regulation of sodium ion transmembrane transport	18		7	38.8889	5.05	0.21909	3187		0.02211	462		5	27.7778	3.43	0.2478	3308		0.00689	263		1	5.55556	0.59	0.45175	2998		0.45175	1447		NA	NA	NA	NA	NA		NA	7769		7	38.8889	5.12	0.23071	3304		0.02306	477		7
GO:0060351	cartilage development involved in endochondral bone morphogenesis	26		9	34.6154	7.3	0.29221	3592		0.02212	463		4	15.3846	4.95	0.75719	5838		0.71846	4015		1	3.84615	0.85	0.58039	3444		0.58039	1699		1	3.84615	0.44	0.36044	2197		0.36044	931		9	34.6154	7.4	0.30818	3633		0.02307	479		9
GO:0010912	positive regulation of isomerase activity	9		4	44.4444	2.53	0.22751	3358		0.02212	464		3	33.3333	1.71	0.23652	3088		0.09487	935		1	11.1111	0.3	0.25948	2137		1	2472		0	0	0.15	1	4753		1	1561		4	44.4444	2.56	0.23605	3347		0.02307	480		4
GO:0045604	regulation of epidermal cell differentiation	42		13	30.9524	11.79	0.39465	4072		0.02213	465		6	14.2857	7.99	0.83696	6319		0.81559	4486		0	0	1.38	1	6575		1	4548		0	0	0.72	1	6118		1	1562		12	28.5714	11.96	0.5524	5028		0.0231	482		11
GO:0006555	methionine metabolic process	14		5	35.7143	3.93	0.35323	3879		0.02213	466		2	14.2857	2.66	0.77685	6017		0.46939	2886		1	7.14286	0.46	0.37336	2699		0.37336	1291		0	0	0.24	1	4300		1	1563		3	21.4286	3.99	0.80742	6176		0.63414	3853		5
GO:0006858	extracellular transport	22		7	31.8182	6.18	0.42557	4259		0.02213	467		6	27.2727	4.19	0.22922	3069		0.09483	933		0	0	0.72	1	5182		1	2470		0	0	0.37	1	4373		1	1564		7	31.8182	6.26	0.44205	4445		0.02308	481		7
GO:0042737	drug catabolic process	110		41	37.2727	30.88	0.02226	1679		0.02226	468		30	27.2727	20.94	0.02166	1514		0.02166	411		2	1.81818	3.61	0.88056	4339		0.88056	2037		5	4.54545	1.87	0.03978	614		0.03978	152		37	33.6364	31.31	0.13613	2679		0.13613	1209		40
GO:0006915	apoptotic process	1559		546	35.0225	437.65	9.9e-11	136		0.02352	469		387	24.8236	296.72	9.7e-10	155		0.0038	209		69	4.42591	51.16	0.00559	419		0.01822	151		39	2.5016	26.55	0.00853	344		0.36611	939		546	35.0225	443.81	1.1e-09	145		0.00675	263		534
GO:0010243	response to organonitrogen compound	793		288	36.3178	222.62	1.2e-07	255		0.02355	470		209	26.3556	150.93	1.1e-07	238		0.0015	143		35	4.41362	26.02	0.04504	898		0.93518	2092		18	2.26986	13.5	0.13033	1153		0.50725	1095		305	38.4615	225.75	2.4e-10	134		0.00167	153		277
GO:0045766	positive regulation of angiogenesis	126		44	34.9206	35.37	0.05486	2092		0.02356	471		33	26.1905	23.98	0.02944	1682		0.00394	211		5	3.96825	4.13	0.39804	2825		0.39804	1350		3	2.38095	2.15	0.36314	2223		0.36314	938		48	38.0952	35.87	0.01199	1348		0.00304	199		42
GO:0044262	cellular carbohydrate metabolic process	229		84	36.6812	64.29	0.00265	997		0.02363	472		51	22.2707	43.58	0.12118	2485		0.00551	236		7	3.05677	7.52	0.62921	3603		0.75444	1931		1	0.436681	3.9	0.9811	3689		1	1565		79	34.4978	65.19	0.02615	1698		0.14217	1229		80
GO:1903307	positive regulation of regulated secretory pathway	42		20	47.619	11.79	0.00545	1151		0.02392	473		14	33.3333	7.99	0.01979	1488		0.65109	3432		1	2.38095	1.38	0.75432	3992		1	3856		1	2.38095	0.72	0.51446	2701		1	1566		21	50	11.96	0.00255	946		0.02517	494		20
GO:0034504	protein localization to nucleus	230		70	30.4348	64.57	0.23113	3421		0.02392	474		46	20	43.77	0.37915	3971		0.4913	2912		10	4.34783	7.55	0.22472	1897		0.29375	1087		2	0.869565	3.92	0.90605	3534		1	1567		66	28.6957	65.48	0.49446	4609		0.17962	1469		67
GO:0072673	lamellipodium morphogenesis	15		9	60	4.21	0.00958	1345		0.024	475		5	33.3333	2.85	0.14008	2636		0.24284	1672		0	0	0.49	1	7508		1	2843		1	6.66667	0.26	0.22722	1639		0.22722	694		10	66.6667	4.27	0.00236	937		0.00186	163		9
GO:1902692	regulation of neuroblast proliferation	19		10	52.6316	5.33	0.02051	1609		0.02401	476		5	26.3158	3.62	0.28759	3453		0.24296	1677		2	10.5263	0.62	0.12744	1333		0.1535	526		1	5.26316	0.32	0.27859	1880		1	1568		11	57.8947	5.41	0.00684	1167		0.02526	496		8
GO:0010543	regulation of platelet activation	23		10	43.4783	6.46	0.08241	2359		0.02403	477		7	30.4348	4.38	0.13121	2523		0.00556	249		3	13.0435	0.75	0.0382	854		0.15321	518		1	4.34783	0.39	0.32656	2068		1	1569		13	56.5217	6.55	0.00439	1059		0.02524	495		10
GO:0002248	connective tissue replacement involved in inflammatory response wound healing	5		4	80	1.4	0.02406	1694		0.02406	478		2	40	0.95	0.24302	3182		0.24302	1704		0	0	0.16	1	4876		1	2864		0	0	0.09	1	3948		1	1570		4	80	1.42	0.02534	1657		0.02534	498		4
GO:0090647	modulation of age-related behavioral decline	5		4	80	1.4	0.02406	1695		0.02406	479		2	40	0.95	0.24302	3186		0.24302	1708		0	0	0.16	1	7627		1	2867		0	0	0.09	1	7448		1	1571		4	80	1.42	0.02534	1658		0.02534	499		4
GO:0014004	microglia differentiation	5		4	80	1.4	0.02406	1696		0.02406	480		2	40	0.95	0.24302	3192		0.24302	1714		1	20	0.16	0.15369	1422		0.15369	555		0	0	0.09	1	4776		1	1572		3	60	1.42	0.14336	2739		0.14336	1257		4
GO:0033211	adiponectin-activated signaling pathway	5		4	80	1.4	0.02406	1697		0.02406	481		4	80	0.95	0.00555	1103		0.00555	242		0	0	0.16	1	6055		1	2198		1	20	0.09	0.0823	811		0.0823	217		4	80	1.42	0.02534	1659		0.02534	500		4
GO:0033239	negative regulation of cellular amine metabolic process	5		4	80	1.4	0.02406	1698		0.02406	482		3	60	0.95	0.05072	1908		0.05072	648		0	0	0.16	1	6061		1	2351		0	0	0.09	1	5467		1	1573		3	60	1.42	0.14336	2742		0.14336	1258		3
GO:0046836	glycolipid transport	5		4	80	1.4	0.02406	1699		0.02406	483		3	60	0.95	0.05072	1909		0.05072	649		2	40	0.16	0.01006	520		0.01006	108		1	20	0.09	0.0823	836		0.0823	218		4	80	1.42	0.02534	1660		0.02534	501		4
GO:0060398	regulation of growth hormone receptor signaling pathway	5		4	80	1.4	0.02406	1700		0.02406	484		1	20	0.95	0.65208	5139		0.65208	3540		1	20	0.16	0.15369	1486		0.15369	578		0	0	0.09	1	6777		1	1574		4	80	1.42	0.02534	1661		0.02534	502		4
GO:0033864	positive regulation of NAD(P)H oxidase activity	5		4	80	1.4	0.02406	1701		0.02406	485		3	60	0.95	0.05072	1910		0.05072	650		0	0	0.16	1	6085		1	2352		0	0	0.09	1	5506		1	1575		4	80	1.42	0.02534	1662		0.02534	503		3
GO:0038027	apolipoprotein A-I-mediated signaling pathway	5		4	80	1.4	0.02406	1702		0.02406	486		1	20	0.95	0.65208	5170		0.65208	3571		0	0	0.16	1	6290		1	3956		0	0	0.09	1	5774		1	1576		4	80	1.42	0.02534	1666		0.02534	504		4
GO:0003056	regulation of vascular smooth muscle contraction	5		4	80	1.4	0.02406	1703		0.02406	487		3	60	0.95	0.05072	1915		0.05072	655		1	20	0.16	0.15369	1497		0.15369	539		0	0	0.09	1	4062		1	1577		3	60	1.42	0.14336	2753		0.14336	1259		4
GO:2000172	regulation of branching morphogenesis of a nerve	5		4	80	1.4	0.02406	1704		0.02406	488		2	40	0.95	0.24302	3215		0.24302	1737		3	60	0.16	0.00033	230		0.00033	37		NA	NA	NA	NA	NA		NA	7770		4	80	1.42	0.02534	1667		0.02534	505		4
GO:0071640	regulation of macrophage inflammatory protein 1 alpha production	5		4	80	1.4	0.02406	1705		0.02406	489		4	80	0.95	0.00555	1104		0.00555	243		1	20	0.16	0.15369	1479		0.15369	531		1	20	0.09	0.0823	806		0.0823	219		4	80	1.42	0.02534	1668		0.02534	506		4
GO:1900425	negative regulation of defense response to bacterium	5		4	80	1.4	0.02406	1706		0.02406	490		4	80	0.95	0.00555	1105		0.00555	244		1	20	0.16	0.15369	1439		0.15369	532		0	0	0.09	1	7687		1	1578		4	80	1.42	0.02534	1669		0.02534	507		4
GO:1900426	positive regulation of defense response to bacterium	5		4	80	1.4	0.02406	1707		0.02406	491		3	60	0.95	0.05072	1918		0.05072	658		3	60	0.16	0.00033	229		0.00033	36		1	20	0.09	0.0823	823		0.0823	220		5	100	1.42	0.00187	896		0.00187	166		4
GO:0061419	positive regulation of transcription from RNA polymerase II promoter in response to hypoxia	5		4	80	1.4	0.02406	1708		0.02406	492		2	40	0.95	0.24302	3230		0.24302	1752		1	20	0.16	0.15369	1444		0.15369	561		0	0	0.09	1	6924		1	1579		4	80	1.42	0.02534	1670		0.02534	508		2
GO:2000556	positive regulation of T-helper 1 cell cytokine production	5		4	80	1.4	0.02406	1709		0.02406	493		3	60	0.95	0.05072	1920		0.05072	660		NA	NA	NA	NA	NA		NA	NA		1	20	0.09	0.0823	831		0.0823	221		3	60	1.42	0.14336	2763		0.14336	1260		4
GO:0038156	interleukin-3-mediated signaling pathway	5		4	80	1.4	0.02406	1710		0.02406	494		4	80	0.95	0.00555	1106		0.00555	245		0	0	0.16	1	6298		1	2199		0	0	0.09	1	5786		1	1580		4	80	1.42	0.02534	1671		0.02534	509		4
GO:0052572	response to host immune response	5		4	80	1.4	0.02406	1711		0.02406	495		3	60	0.95	0.05072	1921		0.05072	661		2	40	0.16	0.01006	518		0.01006	109		1	20	0.09	0.0823	809		0.0823	222		3	60	1.42	0.14336	2767		0.14336	1261		4
GO:0005981	regulation of glycogen catabolic process	5		4	80	1.4	0.02406	1712		0.02406	496		2	40	0.95	0.24302	3239		0.24302	1761		0	0	0.16	1	5006		1	2896		0	0	0.09	1	4142		1	1581		2	40	1.42	0.44004	4363		0.44004	2764		4
GO:0010896	regulation of triglyceride catabolic process	5		4	80	1.4	0.02406	1713		0.02406	497		1	20	0.95	0.65208	5227		0.65208	3628		0	0	0.16	1	5458		1	3994		0	0	0.09	1	4749		1	1582		4	80	1.42	0.02534	1674		0.02534	510		4
GO:1903335	regulation of vacuolar transport	5		4	80	1.4	0.02406	1714		0.02406	498		3	60	0.95	0.05072	1928		0.05072	668		1	20	0.16	0.15369	1463		0.15369	543		1	20	0.09	0.0823	840		0.0823	223		3	60	1.42	0.14336	2784		0.14336	1262		4
GO:0032763	regulation of mast cell cytokine production	5		4	80	1.4	0.02406	1715		0.02406	499		5	100	0.95	0.00025	619		0.00025	70		1	20	0.16	0.15369	1457		0.15369	530		0	0	0.09	1	5397		1	1583		4	80	1.42	0.02534	1675		0.02534	511		4
GO:0006003	fructose 2,6-bisphosphate metabolic process	5		4	80	1.4	0.02406	1716		0.02406	500		3	60	0.95	0.05072	1929		0.05072	669		0	0	0.16	1	5011		1	2359		0	0	0.09	1	4147		1	1584		4	80	1.42	0.02534	1676		0.02534	512		4
GO:0051036	regulation of endosome size	5		4	80	1.4	0.02406	1717		0.02406	501		2	40	0.95	0.24302	3261		0.24302	1783		0	0	0.16	1	6873		1	2911		0	0	0.09	1	6518		1	1585		4	80	1.42	0.02534	1677		0.02534	513		4
GO:0034136	negative regulation of toll-like receptor 2 signaling pathway	5		4	80	1.4	0.02406	1718		0.02406	502		3	60	0.95	0.05072	1930		0.05072	670		2	40	0.16	0.01006	513		0.01006	110		0	0	0.09	1	5535		1	1586		4	80	1.42	0.02534	1678		0.02534	514		4
GO:1903298	negative regulation of hypoxia-induced intrinsic apoptotic signaling pathway	5		4	80	1.4	0.02406	1719		0.02406	503		4	80	0.95	0.00555	1107		0.00555	246		NA	NA	NA	NA	NA		NA	NA		NA	NA	NA	NA	NA		NA	7771		4	80	1.42	0.02534	1679		0.02534	515		4
GO:1905906	regulation of amyloid fibril formation	5		4	80	1.4	0.02406	1720		0.02406	504		3	60	0.95	0.05072	1931		0.05072	671		NA	NA	NA	NA	NA		NA	NA		1	20	0.09	0.0823	838		0.0823	224		5	100	1.42	0.00187	898		0.00187	167		3
GO:1903772	regulation of viral budding via host ESCRT complex	5		4	80	1.4	0.02406	1721		0.02406	505		5	100	0.95	0.00025	620		0.00025	71		NA	NA	NA	NA	NA		NA	NA		NA	NA	NA	NA	NA		NA	7772		3	60	1.42	0.14336	2794		0.14336	1263		4
GO:0015939	pantothenate metabolic process	5		4	80	1.4	0.02406	1722		0.02406	506		2	40	0.95	0.24302	3271		0.24302	1793		0	0	0.16	1	5563		1	2916		0	0	0.09	1	4870		1	1587		4	80	1.42	0.02534	1680		0.02534	516		4
GO:0045919	positive regulation of cytolysis	5		4	80	1.4	0.02406	1723		0.02406	507		3	60	0.95	0.05072	1934		0.05072	674		1	20	0.16	0.15369	1434		0.15369	545		0	0	0.09	1	6202		1	1588		4	80	1.42	0.02534	1682		0.02534	517		4
GO:1903525	regulation of membrane tubulation	5		4	80	1.4	0.02406	1724		0.02406	508		2	40	0.95	0.24302	3275		0.24302	1797		1	20	0.16	0.15369	1490		0.15369	568		NA	NA	NA	NA	NA		NA	7773		4	80	1.42	0.02534	1683		0.02534	518		4
GO:0002396	MHC protein complex assembly	5		4	80	1.4	0.02406	1725		0.02406	509		4	80	0.95	0.00555	1108		0.00555	247		0	0	0.16	1	4888		1	2200		0	0	0.09	1	3974		1	1589		3	60	1.42	0.14336	2800		0.14336	1264		4
GO:0045687	positive regulation of glial cell differentiation	30		11	36.6667	8.42	0.19657	3124		0.02406	510		4	13.3333	5.71	0.84971	6392		0.97242	5106		1	3.33333	0.98	0.63292	3627		1	4927		0	0	0.51	1	6140		1	1590		11	36.6667	8.54	0.21059	3140		0.43974	2749		9
GO:0009084	glutamine family amino acid biosynthetic process	16		7	43.75	4.49	0.13298	2712		0.02406	511		3	18.75	3.05	0.61148	4914		0.59439	3279		0	0	0.53	1	5298		1	3779		0	0	0.27	1	4522		1	1591		7	43.75	4.55	0.14109	2691		0.02534	519		7
GO:0046677	response to antibiotic	263		95	36.1217	73.83	0.00251	981		0.02407	512		67	25.4753	50.06	0.00568	1114		0.00999	310		14	5.32319	8.63	0.05186	951		0.16853	623		8	3.04183	4.48	0.08094	794		0.09822	335		98	37.2624	74.87	0.00113	838		0.00484	225		91
GO:0032488	Cdc42 protein signal transduction	10		5	50	2.81	0.11912	2613		0.02407	513		3	30	1.9	0.29315	3493		0.24301	1684		2	20	0.33	0.04061	865		0.04061	248		1	10	0.17	0.15786	1328		1	1592		5	50	2.85	0.12516	2617		0.14331	1250		5
GO:1903421	regulation of synaptic vesicle recycling	21		8	38.0952	5.9	0.21373	3174		0.02407	514		5	23.8095	4	0.36971	3927		0.05078	678		1	4.7619	0.69	0.50405	3203		1	2362		NA	NA	NA	NA	NA		NA	7774		8	38.0952	5.98	0.22607	3191		0.14332	1254		7
GO:0045058	T cell selection	45		13	28.8889	12.63	0.50783	4757		0.02411	515		7	15.5556	8.56	0.77928	6048		0.24343	1814		2	4.44444	1.48	0.43732	2958		0.35211	1254		1	2.22222	0.77	0.53892	2758		0.53892	1120		12	26.6667	12.81	0.66032	5553		0.02542	532		12
GO:0006836	neurotransmitter transport	181		63	34.8066	50.81	0.02753	1786		0.02419	516		38	20.9945	34.45	0.27614	3431		0.28253	1879		10	5.52486	5.94	0.07502	1067		0.78852	1964		6	3.31492	3.08	0.08922	888		0.42933	1016		62	34.2541	51.53	0.05084	2022		0.02748	538		60
GO:0046330	positive regulation of JNK cascade	123		47	38.2114	34.53	0.00923	1336		0.02436	517		27	21.9512	23.41	0.23435	3079		0.32534	2128		9	7.31707	4.04	0.01992	668		0.04309	257		2	1.62602	2.09	0.62271	2980		0.62271	1187		45	36.5854	35.02	0.03055	1781		0.05196	660		46
GO:0046907	intracellular transport	1657		531	32.0459	465.17	7.7e-05	558		0.02461	518		374	22.5709	315.37	6.4e-05	494		0.77071	4141		52	3.1382	54.38	0.65942	3703		0.1682	622		23	1.38805	28.22	0.87956	3485		0.13013	445		530	31.9855	471.71	0.00042	692		0.01568	363		518
GO:0035556	intracellular signal transduction	2255		761	33.7472	633.04	4.5e-11	130		0.02461	519		503	22.306	429.18	1e-05	392		0.55238	3056		106	4.70067	74	4.4e-05	155		0.92672	2084		51	2.26164	38.4	0.0175	460		0.42643	1015		744	32.9933	641.94	1.2e-07	235		0.16316	1375		745
GO:0030335	positive regulation of cell migration	395		147	37.2152	110.89	3.9e-05	508		0.02491	520		97	24.557	75.18	0.00345	997		0.56107	3063		20	5.06329	12.96	0.03662	846		0.23802	931		11	2.78481	6.73	0.07529	770		0.94147	1347		144	36.4557	112.45	0.00029	655		0.03256	553		145
GO:0010558	negative regulation of macromolecule biosynthetic process	1182		301	25.4653	331.82	0.98391	7591		0.02497	521		201	17.0051	224.96	0.97257	7288		0.65646	3729		37	3.13029	38.79	0.64563	3672		1	4061		19	1.60745	20.13	0.63934	3025		1	1593		300	25.3807	336.49	0.99419	7799		0.02645	536		281
GO:0019693	ribose phosphate metabolic process	450		159	35.3333	126.33	0.00038	695		0.0258	522		139	30.8889	85.65	5.7e-10	152		0.01374	328		13	2.88889	14.77	0.72097	3887		1	2224		2	0.444444	7.66	0.99652	3727		1	1594		176	39.1111	128.1	4.8e-07	282		0.00616	245		149
GO:0006094	gluconeogenesis	72		27	37.5	20.21	0.05192	2060		0.02592	523		14	19.4444	13.7	0.51203	4505		0.06675	732		2	2.77778	2.36	0.68927	3780		0.68927	1838		1	1.38889	1.23	0.71062	3163		0.71062	1248		22	30.5556	20.5	0.38979	4032		0.20057	1597		25
GO:0030316	osteoclast differentiation	82		37	45.122	23.02	0.0007	777		0.026	524		24	29.2683	15.61	0.01629	1451		0.0861	808		4	4.87805	2.69	0.28252	2219		0.59313	1709		2	2.43902	1.4	0.40848	2379		1	1595		36	43.9024	23.34	0.00198	902		0.07923	864		37
GO:0051403	stress-activated MAPK cascade	239		93	38.9121	67.09	0.00017	624		0.02609	525		56	23.431	45.49	0.05057	1898		0.40445	2530		14	5.85774	7.84	0.02628	743		0.32643	1155		5	2.09205	4.07	0.38497	2303		1	1596		92	38.4937	68.04	0.00047	705		0.00645	249		89
GO:1901215	negative regulation of neuron death	153		47	30.719	42.95	0.25794	3474		0.0261	526		35	22.8758	29.12	0.13335	2597		0.2334	1583		4	2.61438	5.02	0.74427	3971		0.79257	1968		4	2.61438	2.61	0.26385	1814		1	1597		46	30.0654	43.56	0.3589	3876		0.11653	1139		48
GO:1902905	positive regulation of supramolecular fiber organization	172		66	38.3721	48.29	0.00209	934		0.02643	527		51	29.6512	32.74	0.00048	686		0.17702	1278		7	4.06977	5.64	0.33543	2553		0.32959	1164		3	1.74419	2.93	0.56391	2826		0.44465	1034		64	37.2093	48.96	0.00773	1213		0.00655	254		66
GO:0014912	negative regulation of smooth muscle cell migration	17		9	52.9412	4.77	0.02646	1753		0.02646	528		7	41.1765	3.24	0.02927	1669		0.02927	507		2	11.7647	0.56	0.10571	1239		0.10571	426		0	0	0.29	1	4825		1	1598		10	58.8235	4.84	0.00851	1232		0.00851	298		9
GO:0010592	positive regulation of lamellipodium assembly	17		9	52.9412	4.77	0.02646	1754		0.02646	529		7	41.1765	3.24	0.02927	1670		0.02927	508		1	5.88235	0.56	0.43312	2923		0.43312	1403		0	0	0.29	1	4666		1	1599		9	52.9412	4.84	0.02893	1724		0.02893	543		9
GO:0032682	negative regulation of chemokine production	17		9	52.9412	4.77	0.02646	1755		0.02646	530		6	35.2941	3.24	0.08689	2236		0.08689	820		1	5.88235	0.56	0.43312	2932		0.43312	1405		1	5.88235	0.29	0.25334	1765		0.25334	751		9	52.9412	4.84	0.02893	1725		0.02893	544		9
GO:0001913	T cell mediated cytotoxicity	43		24	55.814	12.07	0.00012	599		0.02667	531		19	44.186	8.18	0.00014	563		0.1785	1280		3	6.97674	1.41	0.16651	1534		0.05706	285		3	6.97674	0.73	0.0365	574		0.18518	598		23	53.4884	12.24	0.00048	707		0.09409	1001		24
GO:2000785	regulation of autophagosome assembly	34		19	55.8824	9.54	0.0006	757		0.02676	532		11	32.3529	6.47	0.04524	1835		0.40616	2538		2	5.88235	1.12	0.30747	2427		1	3319		NA	NA	NA	NA	NA		NA	7775		19	55.8824	9.68	0.00072	761		0.02887	541		16
GO:0006656	phosphatidylcholine biosynthetic process	32		15	46.875	8.98	0.01798	1560		0.02679	533		8	25	6.09	0.25368	3339		0.5303	2969		0	0	1.05	1	5147		1	3574		0	0	0.54	1	4332		1	1600		15	46.875	9.11	0.02043	1537		0.0298	550		13
GO:0007249	I-kappaB kinase/NF-kappaB signaling	242		112	46.281	67.94	9.2e-10	163		0.02679	534		81	33.4711	46.06	5.4e-08	218		0.0093	307		19	7.85124	7.94	0.0004	243		0.22567	853		7	2.89256	4.12	0.11986	1081		0.10154	339		113	46.6942	68.89	9.9e-10	144		0.00403	219		111
GO:0048536	spleen development	25		12	48	7.02	0.02685	1764		0.02685	535		7	28	4.76	0.18366	2921		0.18366	1373		1	4	0.82	0.56612	3394		0.56612	1668		1	4	0.43	0.34934	2140		0.34934	916		13	52	7.12	0.01101	1324		0.01101	338		10
GO:0030049	muscle filament sliding	25		12	48	7.02	0.02685	1765		0.02685	536		9	36	4.76	0.03502	1731		0.03502	520		1	4	0.82	0.56612	3393		0.56612	1666		0	0	0.43	1	5096		1	1601		12	48	7.12	0.02986	1766		0.02986	551		12
GO:1902176	negative regulation of oxidative stress-induced intrinsic apoptotic signaling pathway	17		10	58.8235	4.77	0.00765	1260		0.02694	537		8	47.0588	3.24	0.00801	1184		0.0152	363		1	5.88235	0.56	0.43312	2933		0.43312	1402		NA	NA	NA	NA	NA		NA	7776		10	58.8235	4.84	0.00851	1233		0.02905	545		11
GO:0030224	monocyte differentiation	27		12	44.4444	7.58	0.05059	2048		0.02697	538		6	22.2222	5.14	0.41044	4130		0.18044	1304		3	11.1111	0.89	0.05735	986		0.05694	284		2	7.40741	0.46	0.07672	777		0.18574	603		10	37.037	7.69	0.21585	3153		0.09499	1020		11
GO:0048143	astrocyte activation	12		7	58.3333	3.37	0.027	1770		0.027	539		6	50	2.28	0.01523	1408		0.01523	367		0	0	0.39	1	6738		1	2238		0	0	0.2	1	6348		1	1602		7	58.3333	3.42	0.02912	1740		0.02912	546		6
GO:0071712	ER-associated misfolded protein catabolic process	12		7	58.3333	3.37	0.027	1771		0.027	540		6	50	2.28	0.01523	1410		0.01523	369		1	8.33333	0.39	0.33007	2481		0.33007	1171		0	0	0.2	1	7192		1	1603		8	66.6667	3.42	0.00668	1156		0.00668	261		7
GO:0044117	growth of symbiont in host	12		7	58.3333	3.37	0.027	1772		0.027	541		4	33.3333	2.28	0.18028	2835		0.18028	1294		0	0	0.39	1	6488		1	2626		0	0	0.2	1	6021		1	1604		7	58.3333	3.42	0.02912	1741		0.02912	547		6
GO:0007597	blood coagulation, intrinsic pathway	12		7	58.3333	3.37	0.027	1773		0.027	542		4	33.3333	2.28	0.18028	2838		0.18028	1297		2	16.6667	0.39	0.05706	975		0.05706	287		1	8.33333	0.2	0.18632	1458		0.18632	606		6	50	3.42	0.09496	2399		0.09496	1009		7
GO:0043306	positive regulation of mast cell degranulation	12		7	58.3333	3.37	0.027	1774		0.027	543		5	41.6667	2.28	0.06031	2021		0.06031	715		0	0	0.39	1	6428		1	2370		0	0	0.2	1	5940		1	1605		7	58.3333	3.42	0.02912	1743		0.02912	548		7
GO:0042398	cellular modified amino acid biosynthetic process	42		15	35.7143	11.79	0.17471	3088		0.02702	544		11	26.1905	7.99	0.16107	2749		0.06028	704		4	9.52381	1.38	0.04804	916		0.11589	437		2	4.7619	0.72	0.16005	1336		1	1606		15	35.7143	11.96	0.19017	3089		0.09491	1007		14
GO:0006471	protein ADP-ribosylation	27		10	37.037	7.58	0.20231	3144		0.02705	545		8	29.6296	5.14	0.12539	2500		0.06029	706		5	18.5185	0.89	0.00165	319		0.00241	61		3	11.1111	0.46	0.01054	375		0.18497	597		9	33.3333	7.69	0.35434	3864		0.0951	1022		9
GO:0034329	cell junction assembly	272		76	27.9412	76.36	0.54281	4990		0.02716	546		44	16.1765	51.77	0.90361	6796		0.06129	716		6	2.20588	8.93	0.88641	4360		0.33239	1217		4	1.47059	4.63	0.68446	3103		1	1607		70	25.7353	77.43	0.85967	6582		0.09606	1023		72
GO:0031100	animal organ regeneration	65		23	35.3846	18.25	0.12085	2649		0.02722	547		18	27.6923	12.37	0.0568	1994		0.05358	682		4	6.15385	2.13	0.16441	1531		0.13513	481		4	6.15385	1.11	0.02469	510		0.0282	119		26	40	18.5	0.02969	1762		0.00579	243		22
GO:0046718	viral entry into host cell	104		47	45.1923	29.2	0.00014	609		0.02913	548		38	36.5385	19.79	2e-05	419		0.0099	309		6	5.76923	3.41	0.12688	1327		0.26618	1001		10	9.61538	1.77	1.1e-05	64		0.00221	36		49	47.1154	29.61	3.9e-05	502		0.03455	561		46
GO:0032733	positive regulation of interleukin-10 production	28		13	46.4286	7.86	0.02925	1793		0.02925	549		8	28.5714	5.33	0.1478	2700		0.1478	1152		2	7.14286	0.92	0.23385	1924		0.23385	858		1	3.57143	0.48	0.38208	2280		0.38208	959		13	46.4286	7.97	0.03267	1795		0.03267	554		13
GO:0042593	glucose homeostasis	176		62	35.2273	49.41	0.02225	1678		0.03006	550		41	23.2955	33.5	0.09014	2305		0.17456	1277		5	2.84091	5.78	0.68983	3799		0.37124	1270		3	1.70455	3	0.57956	2865		0.57956	1148		63	35.7955	50.1	0.02012	1533		0.01955	404		58
GO:0070588	calcium ion transmembrane transport	221		73	33.0317	62.04	0.05879	2187		0.03024	551		52	23.5294	42.06	0.05413	1970		0.2031	1529		9	4.0724	7.25	0.30176	2334		0.1373	485		8	3.61991	3.76	0.03556	568		0.16382	548		74	33.4842	62.91	0.05734	2068		0.01934	389		72
GO:0060048	cardiac muscle contraction	87		32	36.7816	24.42	0.04774	2034		0.03071	552		23	26.4368	16.56	0.05588	1981		0.16416	1187		2	2.29885	2.86	0.78422	4070		1	2568		2	2.29885	1.48	0.43786	2486		1	1608		33	37.931	24.77	0.03514	1827		0.03368	556		32
GO:0098586	cellular response to virus	43		19	44.186	12.07	0.01716	1553		0.03075	553		17	39.5349	8.18	0.00143	831		0.00172	153		8	18.6047	1.41	6.7e-05	166		0.02574	186		5	11.6279	0.73	0.00078	158		0.00439	51		20	46.5116	12.24	0.00889	1285		0.01127	341		18
GO:1901223	negative regulation of NIK/NF-kappaB signaling	20		10	50	5.61	0.0309	1818		0.0309	554		5	25	3.81	0.3284	3788		0.3284	2140		NA	NA	NA	NA	NA		NA	NA		0	0	0.34	1	7722		1	1609		9	45	5.69	0.08562	2335		0.08562	978		10
GO:0090023	positive regulation of neutrophil chemotaxis	20		10	50	5.61	0.0309	1819		0.0309	555		6	30	3.81	0.16516	2762		0.16516	1201		0	0	0.66	1	7543		1	2574		2	10	0.34	0.04485	634		0.04485	158		10	50	5.69	0.03392	1810		0.03392	558		9
GO:0038083	peptidyl-tyrosine autophosphorylation	31		14	45.1613	8.7	0.03123	1824		0.03123	556		8	25.8065	5.9	0.22513	3051		0.22513	1572		1	3.22581	1.02	0.645	3651		0.645	1780		0	0	0.53	1	5777		1	1610		14	45.1613	8.82	0.03502	1825		0.03502	565		13
GO:0061025	membrane fusion	126		62	49.2063	35.37	3.7e-07	290		0.03304	557		47	37.3016	23.98	1.1e-06	314		0.00034	84		13	10.3175	4.13	0.00025	217		0.07133	339		8	6.34921	2.15	0.0014	185		0.00405	45		62	49.2063	35.87	6.2e-07	287		0.17614	1439		61
GO:0042035	regulation of cytokine biosynthetic process	80		43	53.75	22.46	1.1e-06	325		0.03378	558		30	37.5	15.23	8.4e-05	521		0.10277	960		9	11.25	2.63	0.0012	303		0.6393	1773		2	2.5	1.36	0.39652	2346		1	1611		41	51.25	22.77	1.4e-05	428		0.03623	567		40
GO:0019915	lipid storage	58		26	44.8276	16.28	0.00464	1107		0.03393	559		19	32.7586	11.04	0.00897	1245		0.04887	617		3	5.17241	1.9	0.29665	2325		0.10586	432		2	3.44828	0.99	0.25961	1806		0.25304	748		28	48.2759	16.51	0.00107	820		0.00233	173		25
GO:0030970	retrograde protein transport, ER to cytosol	28		14	50	7.86	0.01135	1395		0.03413	560		10	35.7143	5.33	0.02844	1658		0.13961	1108		2	7.14286	0.92	0.23385	1922		0.23385	857		0	0	0.48	1	5184		1	1612		16	57.1429	7.97	0.00137	853		0.00235	174		14
GO:0048169	regulation of long-term neuronal synaptic plasticity	20		10	50	5.61	0.0309	1820		0.03422	561		6	30	3.81	0.16516	2759		0.14007	1111		0	0	0.66	1	6742		1	2544		3	15	0.34	0.00448	278		0.02599	112		8	40	5.69	0.18313	3054		0.10397	1036		9
GO:0043171	peptide catabolic process	20		10	50	5.61	0.0309	1821		0.03422	562		6	30	3.81	0.16516	2763		0.16516	1202		0	0	0.66	1	6417		1	2575		1	5	0.34	0.29089	1926		0.29089	829		11	55	5.69	0.01133	1331		0.01055	333		10
GO:0048012	hepatocyte growth factor receptor signaling pathway	15		8	53.3333	4.21	0.03426	1841		0.03426	563		5	33.3333	2.85	0.14008	2626		0.14008	1113		0	0	0.49	1	6730		1	2546		0	0	0.26	1	6336		1	1613		8	53.3333	4.27	0.03712	1869		0.03712	590		7
GO:0033540	fatty acid beta-oxidation using acyl-CoA oxidase	15		8	53.3333	4.21	0.03426	1842		0.03426	564		4	26.6667	2.85	0.31576	3606		0.31576	1981		0	0	0.49	1	6071		1	2999		0	0	0.26	1	5479		1	1614		7	46.6667	4.27	0.10391	2425		0.10391	1031		9
GO:0045987	positive regulation of smooth muscle contraction	20		9	45	5.61	0.07932	2342		0.03428	565		5	25	3.81	0.3284	3789		0.3284	2141		0	0	0.66	1	6656		1	3076		0	0	0.34	1	6216		1	1615		9	45	5.69	0.08562	2332		0.03714	592		9
GO:0097028	dendritic cell differentiation	34		19	55.8824	9.54	0.0006	758		0.03428	566		18	52.9412	6.47	9.7e-06	389		0.10318	962		4	11.7647	1.12	0.02437	730		0.02634	190		3	8.82353	0.58	0.01977	479		0.1568	502		21	61.7647	9.68	5.2e-05	520		0.00763	274		19
GO:0050732	negative regulation of peptidyl-tyrosine phosphorylation	44		21	47.7273	12.35	0.0043	1093		0.03432	567		16	36.3636	8.37	0.00523	1080		0.10368	965		3	6.81818	1.44	0.17464	1563		1	2481		2	4.54545	0.75	0.17214	1360		1	1616		22	50	12.53	0.00203	909		0.03664	569		20
GO:0034138	toll-like receptor 3 signaling pathway	19		11	57.8947	5.33	0.00609	1181		0.03446	568		8	42.1053	3.62	0.01741	1459		0.0049	221		3	15.7895	0.62	0.02301	718		0.28282	1022		0	0	0.32	1	5537		1	1617		12	63.1579	5.41	0.00171	881		0.03678	571		10
GO:2001171	positive regulation of ATP biosynthetic process	23		11	47.8261	6.46	0.03451	1850		0.03451	569		8	34.7826	4.38	0.05558	1978		0.05558	689		1	4.34783	0.75	0.53612	3291		0.53612	1609		NA	NA	NA	NA	NA		NA	7777		11	47.8261	6.55	0.03805	1879		0.03805	594		11
GO:0061621	canonical glycolysis	23		11	47.8261	6.46	0.03451	1851		0.03451	570		9	39.1304	4.38	0.02007	1492		0.02007	403		0	0	0.75	1	7222		1	2245		0	0	0.39	1	6939		1	1618		11	47.8261	6.55	0.03805	1880		0.03805	595		11
GO:0070486	leukocyte aggregation	10		6	60	2.81	0.03457	1856		0.03457	571		6	60	1.9	0.0049	1053		0.0049	222		0	0	0.33	1	7301		1	2193		0	0	0.17	1	7030		1	1619		6	60	2.85	0.03694	1837		0.03694	575		7
GO:0030502	negative regulation of bone mineralization	10		6	60	2.81	0.03457	1857		0.03457	572		4	40	1.9	0.10437	2359		0.10437	975		1	10	0.33	0.2838	2249		0.2838	1045		0	0	0.17	1	5136		1	1620		6	60	2.85	0.03694	1839		0.03694	576		6
GO:0006995	cellular response to nitrogen starvation	10		6	60	2.81	0.03457	1858		0.03457	573		5	50	1.9	0.02677	1590		0.02677	458		0	0	0.33	1	5190		1	2265		0	0	0.17	1	4391		1	1621		6	60	2.85	0.03694	1840		0.03694	577		6
GO:0042033	chemokine biosynthetic process	10		6	60	2.81	0.03457	1859		0.03457	574		5	50	1.9	0.02677	1592		0.02677	460		0	0	0.33	1	6320		1	2266		2	20	0.17	0.01187	393		0.01187	84		6	60	2.85	0.03694	1841		0.03694	578		5
GO:0030948	negative regulation of vascular endothelial growth factor receptor signaling pathway	10		6	60	2.81	0.03457	1860		0.03457	575		3	30	1.9	0.29315	3497		0.29315	1911		0	0	0.33	1	5803		1	2967		0	0	0.17	1	5179		1	1622		6	60	2.85	0.03694	1842		0.03694	579		6
GO:0009635	response to herbicide	10		6	60	2.81	0.03457	1861		0.03457	576		3	30	1.9	0.29315	3503		0.29315	1917		0	0	0.33	1	5349		1	2972		0	0	0.17	1	4605		1	1623		6	60	2.85	0.03694	1843		0.03694	580		6
GO:0019388	galactose catabolic process	10		6	60	2.81	0.03457	1862		0.03457	577		3	30	1.9	0.29315	3505		0.29315	1919		1	10	0.33	0.2838	2275		0.2838	1051		0	0	0.17	1	4984		1	1624		7	70	2.85	0.00772	1203		0.00772	286		6
GO:0019852	L-ascorbic acid metabolic process	10		6	60	2.81	0.03457	1863		0.03457	578		4	40	1.9	0.10437	2365		0.10437	981		0	0	0.33	1	5674		1	2489		1	10	0.17	0.15786	1277		0.15786	511		6	60	2.85	0.03694	1845		0.03694	581		5
GO:0043097	pyrimidine nucleoside salvage	10		6	60	2.81	0.03457	1864		0.03457	579		5	50	1.9	0.02677	1599		0.02677	467		2	20	0.33	0.04061	861		0.04061	245		1	10	0.17	0.15786	1294		0.15786	512		6	60	2.85	0.03694	1848		0.03694	582		6
GO:0090481	pyrimidine nucleotide-sugar transmembrane transport	10		6	60	2.81	0.03457	1865		0.03457	580		3	30	1.9	0.29315	3526		0.29315	1940		0	0	0.33	1	7617		1	2983		0	0	0.17	1	7438		1	1625		6	60	2.85	0.03694	1851		0.03694	583		5
GO:0042157	lipoprotein metabolic process	109		33	30.2752	30.6	0.33744	3850		0.0346	581		24	22.0183	20.75	0.2456	3305		0.00063	101		3	2.75229	3.58	0.69906	3821		0.69906	1847		4	3.66972	1.86	0.11541	1062		0.00192	34		38	34.8624	31.03	0.08572	2343		0.03676	570		33
GO:1901381	positive regulation of potassium ion transmembrane transport	24		9	37.5	6.74	0.20807	3159		0.03461	582		6	25	4.57	0.29961	3561		0.10446	986		3	12.5	0.79	0.04262	882		0.04052	243		1	4.16667	0.41	0.33805	2099		0.33805	901		9	37.5	6.83	0.22105	3171		0.03699	589		9
GO:0043124	negative regulation of I-kappaB kinase/NF-kappaB signaling	40		17	42.5	11.23	0.03515	1879		0.03515	583		10	25	7.61	0.21799	3010		0.21799	1542		1	2.5	1.31	0.73731	3948		0.73731	1912		0	0	0.68	1	5925		1	1626		16	40	11.39	0.07748	2271		0.07748	858		17
GO:0042542	response to hydrogen peroxide	124		48	38.7097	34.81	0.0065	1205		0.03526	584		34	27.4194	23.6	0.01406	1359		0.00142	138		9	7.25806	4.07	0.02088	700		0.00262	68		6	4.83871	2.11	0.01932	472		0.00078	23		48	38.7097	35.3	0.0086	1274		0.01955	405		46
GO:0031532	actin cytoskeleton reorganization	81		37	45.679	22.74	0.00053	743		0.03573	585		27	33.3333	15.42	0.00156	855		0.37078	2398		3	3.7037	2.66	0.4993	3160		0.52298	1586		1	1.23457	1.38	0.75229	3238		0.75229	1271		34	41.9753	23.06	0.00617	1140		0.04122	600		37
GO:0032091	negative regulation of protein binding	86		32	37.2093	24.14	0.04087	1938		0.03635	586		24	27.907	16.37	0.02868	1665		0.0313	513		4	4.65116	2.82	0.31218	2433		0.31218	1145		2	2.32558	1.46	0.43205	2450		0.43205	1017		31	36.0465	24.48	0.07673	2267		0.07087	791		34
GO:0042531	positive regulation of tyrosine phosphorylation of STAT protein	46		19	41.3043	12.91	0.03652	1893		0.03652	587		12	26.087	8.75	0.15084	2719		0.15084	1156		5	10.8696	1.51	0.01688	622		0.01688	146		3	6.52174	0.78	0.04328	626		0.04328	156		18	39.1304	13.1	0.07753	2272		0.07753	859		19
GO:0010976	positive regulation of neuron projection development	216		67	31.0185	60.64	0.18474	3108		0.03653	588		38	17.5926	41.11	0.73248	5762		0.31053	1966		8	3.7037	7.09	0.41475	2900		0.68705	1830		3	1.38889	3.68	0.7157	3179		0.7541	1273		62	28.7037	61.49	0.49516	4613		0.11265	1128		66
GO:0008286	insulin receptor signaling pathway	112		43	38.3929	31.44	0.0113	1393		0.03666	589		28	25	21.32	0.07086	2104		0.14404	1148		3	2.67857	3.68	0.71642	3867		0.62663	1758		2	1.78571	1.91	0.57158	2848		0.66745	1216		42	37.5	31.88	0.02362	1633		0.04305	605		43
GO:0014068	positive regulation of phosphatidylinositol 3-kinase signaling	52		21	40.3846	14.6	0.0372	1899		0.0372	590		16	30.7692	9.9	0.02859	1664		0.02859	504		2	3.84615	1.71	0.51285	3225		0.51285	1564		1	1.92308	0.89	0.59133	2893		0.59133	1160		21	40.3846	14.8	0.04287	1910		0.04287	604		21
GO:0071276	cellular response to cadmium ion	26		12	46.1538	7.3	0.03741	1904		0.03741	591		10	38.4615	4.95	0.01657	1454		0.01657	389		2	7.69231	0.85	0.20946	1846		0.20946	841		2	7.69231	0.44	0.07182	762		0.07182	200		13	50	7.4	0.01637	1440		0.01637	377		13
GO:0002683	negative regulation of immune system process	365		153	41.9178	102.47	6e-09	197		0.03744	592		123	33.6986	69.47	1.2e-11	124		0.06029	705		32	8.76712	11.98	4.1e-07	95		0.31143	1143		15	4.10959	6.22	0.00148	189		1	1627		151	41.3699	103.91	5.7e-08	213		0.08714	983		149
GO:0071398	cellular response to fatty acid	45		16	35.5556	12.63	0.16962	2990		0.03751	593		16	35.5556	8.56	0.00671	1141		0.00148	140		0	0	1.48	1	7380		1	2175		1	2.22222	0.77	0.53892	2771		1	1628		16	35.5556	12.81	0.18534	3080		0.01646	380		16
GO:0046627	negative regulation of insulin receptor signaling pathway	29		13	44.8276	8.14	0.03972	1917		0.03972	594		7	24.1379	5.52	0.30783	3580		0.30783	1964		1	3.44828	0.95	0.62044	3581		0.62044	1747		1	3.44828	0.49	0.39262	2323		0.39262	971		12	41.3793	8.26	0.09353	2376		0.09353	996		12
GO:0032735	positive regulation of interleukin-12 production	29		13	44.8276	8.14	0.03972	1918		0.03972	595		10	34.4828	5.52	0.03622	1762		0.03622	558		4	13.7931	0.95	0.01418	570		0.01418	122		2	6.89655	0.49	0.08683	876		0.08683	272		13	44.8276	8.26	0.04417	1927		0.04417	610		12
GO:2000378	negative regulation of reactive oxygen species metabolic process	43		20	46.5116	12.07	0.00754	1248		0.03973	596		17	39.5349	8.18	0.00143	833		0.10916	1000		NA	NA	NA	NA	NA		NA	NA		NA	NA	NA	NA	NA		NA	7778		20	46.5116	12.24	0.00889	1287		0.10899	1116		21
GO:0035904	aorta development	38		15	39.4737	10.67	0.08583	2388		0.03997	597		6	15.7895	7.23	0.75641	5836		0.88314	4743		1	2.63158	1.25	0.71912	3875		0.71912	1885		0	0	0.65	1	5708		1	1629		13	34.2105	10.82	0.26718	3503		0.40778	2588		12
GO:0007202	activation of phospholipase C activity	18		9	50	5.05	0.04	1926		0.04	598		6	33.3333	3.43	0.11023	2436		0.11023	1015		2	11.1111	0.59	0.11645	1292		0.11645	440		1	5.55556	0.31	0.26607	1828		0.26607	785		7	38.8889	5.12	0.23071	3307		0.23071	1762		9
GO:0010667	negative regulation of cardiac muscle cell apoptotic process	18		9	50	5.05	0.04	1927		0.04	599		6	33.3333	3.43	0.11023	2437		0.11023	1016		1	5.55556	0.59	0.45175	2990		0.45175	1449		0	0	0.31	1	4692		1	1630		9	50	5.12	0.04354	1917		0.04354	608		9
GO:0051016	barbed-end actin filament capping	18		9	50	5.05	0.04	1928		0.04	600		4	22.2222	3.43	0.45691	4249		0.45691	2631		0	0	0.59	1	6870		1	3364		0	0	0.31	1	6511		1	1631		9	50	5.12	0.04354	1918		0.04354	609		9
GO:0035458	cellular response to interferon-beta	18		9	50	5.05	0.04	1929		0.04	601		10	55.5556	3.43	0.0006	705		0.0006	93		8	44.4444	0.59	4.1e-08	75		4.1e-08	7		2	11.1111	0.31	0.03692	580		0.03692	142		7	38.8889	5.12	0.23071	3309		0.23071	1763		10
GO:0006636	unsaturated fatty acid biosynthetic process	40		15	37.5	11.23	0.12578	2664		0.04001	602		8	20	7.61	0.50134	4468		0.45697	2634		1	2.5	1.31	0.73731	3953		0.73731	1915		1	2.5	0.68	0.49743	2657		1	1632		14	35	11.39	0.22588	3185		0.10974	1122		14
GO:0006997	nucleus organization	113		32	28.3186	31.72	0.51258	4763		0.04025	603		21	18.5841	21.51	0.58662	4774		0.87411	4656		4	3.53982	3.71	0.51068	3224		1	4649		2	1.76991	1.92	0.57643	2855		1	1633		37	32.7434	32.17	0.18148	3020		0.10941	1119		29
GO:0009166	nucleotide catabolic process	115		42	36.5217	32.28	0.02956	1801		0.04111	604		36	31.3043	21.89	0.00107	787		0.02864	505		3	2.6087	3.77	0.73299	3931		0.67948	1824		1	0.869565	1.96	0.86247	3460		1	1634		43	37.3913	32.74	0.02339	1626		0.04584	611		42
GO:0010952	positive regulation of peptidase activity	160		75	46.875	44.92	2.8e-07	282		0.04288	605		64	40	30.45	5.2e-10	150		0.73162	4058		11	6.875	5.25	0.01643	620		1	4272		6	3.75	2.72	0.05596	687		1	1635		73	45.625	45.55	2.6e-06	334		0.13174	1181		74
GO:0070372	regulation of ERK1 and ERK2 cascade	219		79	36.0731	61.48	0.00571	1165		0.04365	606		59	26.9406	41.68	0.00247	941		0.08132	786		15	6.84932	7.19	0.00581	426		1	2392		10	4.56621	3.73	0.00432	274		1	1636		73	33.3333	62.34	0.0641	2202		0.13414	1186		78
GO:0042147	retrograde transport, endosome to Golgi	79		29	36.7089	22.18	0.0588	2188		0.04386	607		19	24.0506	15.04	0.15928	2747		0.1807	1307		2	2.53165	2.59	0.73725	3943		0.73725	1909		1	1.26582	1.35	0.74358	3220		0.74358	1265		28	35.443	22.49	0.10661	2452		0.12969	1177		29
GO:0071985	multivesicular body sorting pathway	32		17	53.125	8.98	0.00241	961		0.04394	608		12	37.5	6.09	0.01128	1298		0.81447	4374		3	9.375	1.05	0.08642	1156		0.23374	854		0	0	0.54	1	7223		1	1637		19	59.375	9.11	0.00025	647		0.00844	292		17
GO:0043372	positive regulation of CD4-positive, alpha-beta T cell differentiation	27		15	55.5556	7.58	0.00242	968		0.04397	609		13	48.1481	5.14	0.00057	700		0.04743	594		2	7.40741	0.89	0.22163	1882		0.23415	865		3	11.1111	0.46	0.01054	373		0.00751	68		14	51.8519	7.69	0.0087	1275		0.04662	616		15
GO:0070206	protein trimerization	45		20	44.4444	12.63	0.01365	1461		0.04397	610		14	31.1111	8.56	0.03571	1757		0.04759	596		4	8.88889	1.48	0.05931	999		0.10526	423		0	0	0.77	1	6992		1	1638		20	44.4444	12.81	0.01596	1420		0.04657	615		19
GO:0045324	late endosome to vacuole transport	16		10	62.5	4.49	0.0042	1084		0.04406	611		9	56.25	3.05	0.00101	777		0.04755	595		1	6.25	0.53	0.41386	2879		1	2324		0	0	0.27	1	6101		1	1639		10	62.5	4.55	0.00469	1078		0.04666	617		10
GO:1901030	positive regulation of mitochondrial outer membrane permeabilization involved in apoptotic signaling pathway	32		14	43.75	8.98	0.04154	1941		0.04409	612		9	28.125	6.09	0.13949	2616		0.18189	1317		1	3.125	1.05	0.65667	3693		1	2635		1	3.125	0.54	0.42319	2420		0.42319	1011		14	43.75	9.11	0.04638	1933		0.04669	619		14
GO:0048662	negative regulation of smooth muscle cell proliferation	35		18	51.4286	9.83	0.00291	1028		0.04416	613		15	42.8571	6.66	0.00102	782		0.03251	515		3	8.57143	1.15	0.10629	1255		0.14979	503		0	0	0.6	1	6411		1	1640		19	54.2857	9.96	0.00116	844		0.04821	656		18
GO:0006621	protein retention in ER lumen	8		5	62.5	2.25	0.0442	1959		0.0442	614		5	62.5	1.52	0.00834	1202		0.00834	276		1	12.5	0.26	0.23434	1993		0.23434	868		0	0	0.14	1	4326		1	1641		6	75	2.28	0.00852	1241		0.00852	308		5
GO:0035810	positive regulation of urine volume	8		5	62.5	2.25	0.0442	1960		0.0442	615		5	62.5	1.52	0.00834	1203		0.00834	277		1	12.5	0.26	0.23434	1990		0.23434	869		0	0	0.14	1	5691		1	1642		4	50	2.28	0.16716	2895		0.16716	1389		5
GO:0035655	interleukin-18-mediated signaling pathway	8		5	62.5	2.25	0.0442	1961		0.0442	616		4	50	1.52	0.04778	1854		0.04778	604		0	0	0.26	1	6214		1	2329		1	12.5	0.14	0.12841	1125		0.12841	411		5	62.5	2.28	0.0468	1939		0.0468	622		6
GO:0071472	cellular response to salt stress	8		5	62.5	2.25	0.0442	1962		0.0442	617		1	12.5	1.52	0.81539	6168		0.81539	4408		1	12.5	0.26	0.23434	1953		0.23434	914		1	12.5	0.14	0.12841	1122		0.12841	412		5	62.5	2.28	0.0468	1942		0.0468	623		4
GO:0060155	platelet dense granule organization	8		5	62.5	2.25	0.0442	1963		0.0442	618		5	62.5	1.52	0.00834	1208		0.00834	282		0	0	0.26	1	7052		1	2214		1	12.5	0.14	0.12841	1121		0.12841	413		5	62.5	2.28	0.0468	1946		0.0468	624		4
GO:0060242	contact inhibition	8		5	62.5	2.25	0.0442	1964		0.0442	619		5	62.5	1.52	0.00834	1209		0.00834	283		1	12.5	0.26	0.23434	1936		0.23434	872		1	12.5	0.14	0.12841	1123		0.12841	414		5	62.5	2.28	0.0468	1947		0.0468	625		5
GO:0060732	positive regulation of inositol phosphate biosynthetic process	8		5	62.5	2.25	0.0442	1965		0.0442	620		2	25	1.52	0.46799	4353		0.46799	2749		0	0	0.26	1	7143		1	3431		1	12.5	0.14	0.12841	1129		0.12841	415		3	37.5	2.28	0.40919	4115		0.40919	2613		4
GO:0007214	gamma-aminobutyric acid signaling pathway	8		5	62.5	2.25	0.0442	1966		0.0442	621		2	25	1.52	0.46799	4356		0.46799	2752		0	0	0.26	1	5229		1	3432		0	0	0.14	1	4440		1	1643		5	62.5	2.28	0.0468	1950		0.0468	626		5
GO:1900122	positive regulation of receptor binding	8		5	62.5	2.25	0.0442	1967		0.0442	622		3	37.5	1.52	0.18212	2873		0.18212	1338		NA	NA	NA	NA	NA		NA	NA		0	0	0.14	1	7664		1	1644		5	62.5	2.28	0.0468	1951		0.0468	627		5
GO:0060586	multicellular organismal iron ion homeostasis	8		5	62.5	2.25	0.0442	1968		0.0442	623		3	37.5	1.52	0.18212	2875		0.18212	1340		0	0	0.26	1	7126		1	2647		0	0	0.14	1	6812		1	1645		5	62.5	2.28	0.0468	1953		0.0468	628		4
GO:0060576	intestinal epithelial cell development	8		5	62.5	2.25	0.0442	1969		0.0442	624		2	25	1.52	0.46799	4359		0.46799	2755		1	12.5	0.26	0.23434	1946		0.23434	903		0	0	0.14	1	6811		1	1646		6	75	2.28	0.00852	1246		0.00852	309		3
GO:0001768	establishment of T cell polarity	8		5	62.5	2.25	0.0442	1970		0.0442	625		2	25	1.52	0.46799	4362		0.46799	2758		0	0	0.26	1	4826		1	3435		0	0	0.14	1	3865		1	1647		3	37.5	2.28	0.40919	4119		0.40919	2614		5
GO:0038155	interleukin-23-mediated signaling pathway	8		5	62.5	2.25	0.0442	1971		0.0442	626		3	37.5	1.52	0.18212	2876		0.18212	1341		0	0	0.26	1	6297		1	2648		0	0	0.14	1	5785		1	1648		5	62.5	2.28	0.0468	1954		0.0468	629		5
GO:2000644	regulation of receptor catabolic process	8		5	62.5	2.25	0.0442	1972		0.0442	627		3	37.5	1.52	0.18212	2878		0.18212	1343		1	12.5	0.26	0.23434	1989		0.23434	884		1	12.5	0.14	0.12841	1124		0.12841	416		6	75	2.28	0.00852	1249		0.00852	310		5
GO:0032463	negative regulation of protein homooligomerization	8		5	62.5	2.25	0.0442	1973		0.0442	628		3	37.5	1.52	0.18212	2879		0.18212	1344		0	0	0.26	1	5946		1	2650		0	0	0.14	1	5361		1	1649		4	50	2.28	0.16716	2914		0.16716	1390		5
GO:0032471	negative regulation of endoplasmic reticulum calcium ion concentration	8		5	62.5	2.25	0.0442	1974		0.0442	629		5	62.5	1.52	0.00834	1214		0.00834	288		0	0	0.26	1	5949		1	2216		2	25	0.14	0.00755	328		0.00755	70		6	75	2.28	0.00852	1250		0.00852	311		5
GO:0010887	negative regulation of cholesterol storage	8		5	62.5	2.25	0.0442	1975		0.0442	630		3	37.5	1.52	0.18212	2880		0.18212	1345		0	0	0.26	1	5451		1	2651		1	12.5	0.14	0.12841	1097		0.12841	417		5	62.5	2.28	0.0468	1955		0.0468	630		5
GO:0017185	peptidyl-lysine hydroxylation	8		5	62.5	2.25	0.0442	1976		0.0442	631		3	37.5	1.52	0.18212	2882		0.18212	1347		1	12.5	0.26	0.23434	1970		0.23434	886		0	0	0.14	1	4928		1	1650		4	50	2.28	0.16716	2916		0.16716	1391		5
GO:0032511	late endosome to vacuole transport via m...	8		5	62.5	2.25	0.0442	1977		0.0442	632		5	62.5	1.52	0.00834	1215		0.00834	289		1	12.5	0.26	0.23434	1972		0.23434	875		0	0	0.14	1	5371		1	1651		5	62.5	2.28	0.0468	1956		0.0468	631		5
GO:0032387	negative regulation of intracellular transport	54		24	44.4444	15.16	0.00727	1241		0.04421	633		18	33.3333	10.28	0.0089	1243		0.02361	431		2	3.7037	1.77	0.53318	3287		1	2258		1	1.85185	0.92	0.60519	2924		0.60519	1170		21	38.8889	15.37	0.06359	2195		0.0477	645		24
GO:0050852	T cell receptor signaling pathway	132		50	37.8788	37.06	0.00897	1331		0.0443	634		31	23.4848	25.12	0.11696	2461		0.36226	2377		5	3.78788	4.33	0.43708	2956		0.95898	2108		1	0.757576	2.25	0.89758	3520		1	1652		47	35.6061	37.58	0.04395	1926		0.11991	1147		48
GO:2000679	positive regulation of transcription regulatory region DNA binding	18		9	50	5.05	0.04	1930		0.04452	635		5	27.7778	3.43	0.2478	3315		0.2478	1829		1	5.55556	0.59	0.45175	3001		0.45175	1452		NA	NA	NA	NA	NA		NA	7779		10	55.5556	5.12	0.01432	1392		0.04775	647		9
GO:0030194	positive regulation of blood coagulation	18		9	50	5.05	0.04	1931		0.04452	636		8	44.4444	3.43	0.01205	1308		0.02375	434		3	16.6667	0.59	0.01985	660		0.01985	159		1	5.55556	0.31	0.26607	1847		1	1653		9	50	5.12	0.04354	1919		0.04781	648		9
GO:0009312	oligosaccharide biosynthetic process	13		7	53.8462	3.65	0.04456	1997		0.04456	637		6	46.1538	2.47	0.0238	1539		0.0238	436		0	0	0.43	1	5334		1	2259		1	7.69231	0.22	0.20018	1517		0.20018	632		6	46.1538	3.7	0.13535	2655		0.13535	1194		7
GO:0097202	activation of cysteine-type endopeptidase activity	13		7	53.8462	3.65	0.04456	1998		0.04456	638		8	61.5385	2.47	0.00088	751		0.00088	110		2	15.3846	0.43	0.06601	1020		0.06601	329		1	7.69231	0.22	0.20018	1516		0.20018	633		8	61.5385	3.7	0.01306	1365		0.01306	353		7
GO:0006978	DNA damage response, signal transduction by p53 class mediator resulting in transcription of p21 class mediator	13		7	53.8462	3.65	0.04456	1999		0.04456	639		4	30.7692	2.47	0.22346	3027		0.22346	1564		1	7.69231	0.43	0.35208	2583		0.35208	1238		0	0	0.22	1	4388		1	1654		7	53.8462	3.7	0.04785	1977		0.04785	650		6
GO:0070935	3'-UTR-mediated mRNA stabilization	13		7	53.8462	3.65	0.04456	2000		0.04456	640		4	30.7692	2.47	0.22346	3029		0.22346	1566		0	0	0.43	1	7339		1	2790		0	0	0.22	1	7074		1	1655		7	53.8462	3.7	0.04785	1979		0.04785	651		5
GO:0045821	positive regulation of glycolytic process	13		7	53.8462	3.65	0.04456	2001		0.04456	641		3	23.0769	2.47	0.46234	4293		0.46234	2658		1	7.69231	0.43	0.35208	2601		0.35208	1244		0	0	0.22	1	6176		1	1656		7	53.8462	3.7	0.04785	1980		0.04785	652		7
GO:0001921	positive regulation of receptor recycling	13		7	53.8462	3.65	0.04456	2002		0.04456	642		6	46.1538	2.47	0.0238	1542		0.0238	439		2	15.3846	0.43	0.06601	1021		0.06601	330		1	7.69231	0.22	0.20018	1513		0.20018	634		6	46.1538	3.7	0.13535	2660		0.13535	1195		6
GO:0090026	positive regulation of monocyte chemotaxis	13		7	53.8462	3.65	0.04456	2003		0.04456	643		6	46.1538	2.47	0.0238	1543		0.0238	440		3	23.0769	0.43	0.00785	472		0.00785	94		1	7.69231	0.22	0.20018	1512		0.20018	635		7	53.8462	3.7	0.04785	1981		0.04785	653		7
GO:0090501	RNA phosphodiester bond hydrolysis	134		32	23.8806	37.62	0.8827	6740		0.04462	644		25	18.6567	25.5	0.57941	4766		0.18245	1363		6	4.47761	4.4	0.27737	2210		0.04063	253		3	2.23881	2.28	0.40012	2348		1	1657		33	24.6269	38.15	0.86204	6585		0.16807	1427		31
GO:0050731	positive regulation of peptidyl-tyrosine phosphorylation	136		53	38.9706	38.18	0.00374	1068		0.04468	645		37	27.2059	25.88	0.01223	1316		0.00862	293		9	6.61765	4.46	0.03514	837		0.48665	1514		4	2.94118	2.32	0.20189	1537		0.78461	1286		50	36.7647	38.72	0.02152	1561		0.15038	1365		51
GO:0097480	establishment of synaptic vesicle localization	115		41	35.6522	32.28	0.0457	2023		0.0457	646		23	20	21.89	0.43258	4193		0.43258	2590		8	6.95652	3.77	0.03546	839		0.03546	235		5	4.34783	1.96	0.04667	646		0.04667	163		39	33.913	32.74	0.11687	2581		0.11687	1142		40
GO:0009611	response to wounding	500		219	43.8	140.36	1.3e-14	88		0.04668	647		141	28.2	95.16	2.5e-07	268		0.0973	944		34	6.8	16.41	4.7e-05	157		0.03391	232		11	2.2	8.51	0.23342	1679		0.4852	1074		218	43.6	142.34	1.3e-13	92		0.09997	1026		217
GO:0008625	extrinsic apoptotic signaling pathway via death domain receptors	74		35	47.2973	20.77	0.00033	669		0.04706	648		29	39.1892	14.08	4.3e-05	462		0.00858	291		5	6.75676	2.43	0.09552	1199		0.54932	1637		2	2.7027	1.26	0.36001	2190		1	1658		34	45.9459	21.07	0.001	811		0.11388	1135		35
GO:0043552	positive regulation of phosphatidylinositol 3-kinase activity	24		11	45.8333	6.74	0.04794	2035		0.04794	649		7	29.1667	4.57	0.15643	2734		0.15643	1165		2	8.33333	0.79	0.18536	1693		0.18536	744		0	0	0.41	1	5976		1	1659		11	45.8333	6.83	0.05264	2032		0.05264	664		11
GO:0032148	activation of protein kinase B activity	24		11	45.8333	6.74	0.04794	2036		0.04794	650		10	41.6667	4.57	0.00882	1237		0.00882	297		3	12.5	0.79	0.04262	883		0.04262	256		1	4.16667	0.41	0.33805	2095		0.33805	902		11	45.8333	6.83	0.05264	2033		0.05264	665		13
GO:0097190	apoptotic signaling pathway	511		195	38.1605	143.45	3.1e-07	286		0.04944	651		146	28.5714	97.26	6.3e-08	221		0.05887	699		22	4.30528	16.77	0.11772	1309		0.37439	1304		13	2.54403	8.7	0.09737	918		0.49086	1082		197	38.5519	145.47	3.4e-07	269		0.0262	534		189
GO:0070059	intrinsic apoptotic signaling pathway in response to endoplasmic reticulum stress	54		25	46.2963	15.16	0.00323	1041		0.05005	652		20	37.037	10.28	0.00147	846		0.05547	687		4	7.40741	1.77	0.1006	1219		0.59232	1708		2	3.7037	0.92	0.23432	1683		0.23432	712		26	48.1481	15.37	0.00167	879		0.05511	667		24
GO:0009435	NAD biosynthetic process	46		22	47.8261	12.91	0.0034	1047		0.05013	653		17	36.9565	8.75	0.00334	991		0.05566	691		2	4.34783	1.51	0.4485	2980		1	2365		1	2.17391	0.78	0.5468	2795		1	1660		23	50	13.1	0.00162	875		0.02325	484		21
GO:0043029	T cell homeostasis	36		15	41.6667	10.11	0.05505	2095		0.05054	654		11	30.5556	6.85	0.06612	2051		0.05617	695		2	5.55556	1.18	0.3318	2527		0.3318	1211		2	5.55556	0.61	0.12489	1088		0.37022	942		15	41.6667	10.25	0.06144	2140		0.02352	486		14
GO:0043393	regulation of protein binding	190		74	38.9474	53.34	0.00072	778		0.05066	655		52	27.3684	36.16	0.00302	970		0.40545	2536		13	6.84211	6.24	0.00995	509		1	3318		6	3.15789	3.24	0.10617	990		0.04857	166		72	37.8947	54.09	0.00294	987		0.05491	666		75
GO:0009725	response to hormone	757		249	32.893	212.51	0.00153	889		0.05102	656		192	25.3633	144.08	6e-06	375		0.01655	388		32	4.22721	24.84	0.08435	1135		0.54332	1628		22	2.90621	12.89	0.00996	368		1	1661		255	33.6856	215.5	0.0007	758		0.01622	375		244
GO:0097327	response to antineoplastic agent	75		28	37.3333	21.05	0.05112	2053		0.05112	657		20	26.6667	14.27	0.06578	2049		0.06578	723		3	4	2.46	0.44853	2982		0.44853	1435		2	2.66667	1.28	0.36615	2229		0.36615	940		31	41.3333	21.35	0.01119	1330		0.01119	340		26
GO:0030101	natural killer cell activation	56		26	46.4286	15.72	0.00256	982		0.05148	658		18	32.1429	10.66	0.01331	1339		0.06606	726		5	8.92857	1.84	0.03614	842		0.50166	1535		2	3.57143	0.95	0.24695	1753		1	1662		25	44.6429	15.94	0.00705	1174		0.05565	670		25
GO:0007212	dopamine receptor signaling pathway	27		15	55.5556	7.58	0.00242	969		0.05171	659		10	37.037	5.14	0.02193	1518		0.17287	1264		1	3.7037	0.89	0.59418	3501		1	2614		0	0	0.46	1	4439		1	1663		14	51.8519	7.69	0.0087	1276		0.05588	673		14
GO:0010629	negative regulation of gene expression	1661		457	27.5135	466.29	0.7158	5773		0.05173	660		331	19.9278	316.13	0.16788	2780		0.42084	2581		65	3.91331	54.51	0.0727	1058		0.44024	1427		31	1.86635	28.28	0.31933	2043		0.11439	395		450	27.0921	472.85	0.91348	7075		0.0984	1024		433
GO:0048741	skeletal muscle fiber development	23		11	47.8261	6.46	0.03451	1852		0.05193	661		7	30.4348	4.38	0.13121	2528		0.17336	1266		0	0	0.75	1	6814		1	2615		1	4.34783	0.39	0.32656	2063		0.32656	883		11	47.8261	6.55	0.03805	1881		0.05604	674		11
GO:0071377	cellular response to glucagon stimulus	16		8	50	4.49	0.05201	2061		0.05201	662		3	18.75	3.05	0.61148	4916		0.61148	3316		1	6.25	0.53	0.41386	2847		0.41386	1376		0	0	0.27	1	7141		1	1664		7	43.75	4.55	0.14109	2694		0.14109	1221		8
GO:0035970	peptidyl-threonine dephosphorylation	16		8	50	4.49	0.05201	2062		0.05201	663		3	18.75	3.05	0.61148	4919		0.61148	3319		3	18.75	0.53	0.0143	571		0.0143	125		1	6.25	0.27	0.24039	1709		0.24039	724		8	50	4.55	0.05612	2052		0.05612	679		8
GO:0071280	cellular response to copper ion	16		8	50	4.49	0.05201	2063		0.05201	664		6	37.5	3.05	0.06656	2059		0.06656	729		1	6.25	0.53	0.41386	2850		0.41386	1366		1	6.25	0.27	0.24039	1704		0.24039	725		7	43.75	4.55	0.14109	2695		0.14109	1222		6
GO:0036152	phosphatidylethanolamine acyl-chain remodeling	16		8	50	4.49	0.05201	2064		0.05201	665		8	50	3.05	0.00508	1071		0.00508	228		1	6.25	0.53	0.41386	2855		0.41386	1364		0	0	0.27	1	5740		1	1665		9	56.25	4.55	0.01812	1478		0.01812	385		8
GO:0032693	negative regulation of interleukin-10 production	16		8	50	4.49	0.05201	2065		0.05201	666		5	31.25	3.05	0.1735	2807		0.1735	1273		2	12.5	0.53	0.09527	1186		0.09527	412		0	0	0.27	1	5387		1	1666		8	50	4.55	0.05612	2056		0.05612	680		8
GO:0044764	multi-organism cellular process	43		18	41.8605	12.07	0.03593	1885		0.05243	667		14	32.5581	8.18	0.02434	1566		0.10044	952		6	13.9535	1.41	0.00263	362		0.00758	92		4	9.30233	0.73	0.006	308		0.13449	448		20	46.5116	12.24	0.00889	1286		0.02568	533		19
GO:0050853	B cell receptor signaling pathway	54		20	37.037	15.16	0.09606	2440		0.05254	668		10	18.5185	10.28	0.59325	4801		0.70097	3820		2	3.7037	1.77	0.53318	3286		1	4107		0	0	0.92	1	6478		1	1667		21	38.8889	15.37	0.06359	2196		0.05807	686		20
GO:0048488	synaptic vesicle endocytosis	44		17	38.6364	12.35	0.08443	2379		0.05256	669		7	15.9091	8.37	0.75832	5848		0.70137	3821		1	2.27273	1.44	0.77023	4036		1	4108		1	2.27273	0.75	0.5309	2734		0.5309	1113		14	31.8182	12.53	0.36431	3886		0.33992	2470		15
GO:1900026	positive regulation of substrate adhesion-dependent cell spreading	30		13	43.3333	8.42	0.05257	2076		0.05257	670		6	20	5.71	0.51937	4553		0.51937	2955		1	3.33333	0.98	0.63292	3605		0.63292	1767		0	0	0.51	1	7647		1	1668		11	36.6667	8.54	0.21059	3137		0.21059	1605		13
GO:0001782	B cell homeostasis	30		13	43.3333	8.42	0.05257	2077		0.05257	671		9	30	5.71	0.10095	2344		0.10095	954		3	10	0.98	0.07415	1064		0.07415	343		1	3.33333	0.51	0.40299	2357		0.40299	984		13	43.3333	8.54	0.05821	2073		0.05821	687		12
GO:0006006	glucose metabolic process	171		61	35.6725	48	0.01772	1555		0.05308	672		38	22.2222	32.55	0.16523	2772		0.08125	784		4	2.33918	5.61	0.81717	4156		0.8412	2006		3	1.75439	2.91	0.55995	2817		0.50552	1089		55	32.1637	48.68	0.16027	2879		0.02776	539		60
GO:0098869	cellular oxidant detoxification	85		32	37.6471	23.86	0.03477	1875		0.05314	673		35	41.1765	16.18	1.9e-06	324		9.8e-06	38		4	4.70588	2.79	0.30473	2339		0.64083	1774		6	7.05882	1.45	0.00326	242		0.00326	42		34	40	24.2	0.01432	1399		0.03576	566		33
GO:0007204	positive regulation of cytosolic calcium ion concentration	216		74	34.2593	60.64	0.02637	1751		0.05318	674		62	28.7037	41.11	0.00034	651		0.00879	296		12	5.55556	7.09	0.05285	959		0.00997	105		11	5.09259	3.68	0.00119	176		0.44437	1033		75	34.7222	61.49	0.02551	1690		0.02439	491		72
GO:0007568	aging	243		76	31.2757	68.22	0.14712	2865		0.05375	675		66	27.1605	46.25	0.00114	793		7.6e-05	58		11	4.52675	7.97	0.1763	1566		0.1511	507		6	2.46914	4.14	0.23419	1682		0.11656	396		81	33.3333	69.18	0.05364	2039		0.01903	387		74
GO:0045732	positive regulation of protein catabolic process	190		74	38.9474	53.34	0.00072	779		0.05386	676		55	28.9474	36.16	0.00057	699		0.08785	895		11	5.78947	6.24	0.04882	938		0.49678	1533		1	0.526316	3.24	0.96265	3647		1	1669		75	39.4737	54.09	0.00065	745		0.1057	1044		74
GO:0051222	positive regulation of protein transport	352		142	40.3409	98.82	3.4e-07	288		0.05396	677		104	29.5455	66.99	9.4e-07	307		0.00118	124		26	7.38636	11.55	0.0001	180		1	2170		5	1.42045	5.99	0.72009	3183		1	1670		144	40.9091	100.21	2.6e-07	260		0.05661	684		139
GO:0043085	positive regulation of catalytic activity	1160		408	35.1724	325.64	1.9e-08	217		0.05459	678		275	23.7069	220.78	2e-05	418		0.00065	103		59	5.08621	38.07	0.00044	249		0.86281	2021		21	1.81034	19.75	0.41752	2407		0.64174	1204		396	34.1379	330.22	5.8e-06	382		0.11125	1126		402
GO:0009267	cellular response to starvation	128		46	35.9375	35.93	0.03143	1826		0.05558	679		37	28.9062	24.36	0.00431	1035		0.05788	697		9	7.03125	4.2	0.02506	734		0.26547	1000		3	2.34375	2.18	0.37243	2265		1	1671		48	37.5	36.44	0.01642	1445		0.06277	778		44
GO:0001776	leukocyte homeostasis	83		36	43.3735	23.3	0.00196	928		0.05561	680		23	27.7108	15.8	0.03426	1726		0.31966	1996		7	8.43373	2.72	0.01908	654		1	3004		4	4.81928	1.41	0.05309	670		1	1672		38	45.7831	23.63	0.00057	734		0.05826	688		35
GO:0060760	positive regulation of response to cytokine stimulus	48		25	52.0833	13.47	0.00037	691		0.05568	681		21	43.75	9.14	7.4e-05	503		0.01395	334		11	22.9167	1.58	3.2e-07	92		0.00062	41		4	8.33333	0.82	0.00886	349		1	1673		22	45.8333	13.66	0.00769	1197		0.05859	691		25
GO:1903214	regulation of protein targeting to mitochondrion	43		23	53.4884	12.07	0.00038	698		0.05571	682		17	39.5349	8.18	0.00143	832		0.08668	813		4	9.30233	1.41	0.05165	950		1	2405		NA	NA	NA	NA	NA		NA	7780		22	51.1628	12.24	0.00138	855		0.05851	689		23
GO:0007159	leukocyte cell-cell adhesion	289		119	41.1765	81.13	8.8e-07	311		0.05576	683		93	32.1799	55	5e-08	214		0.0392	569		20	6.92042	9.48	0.00139	312		1	2312		9	3.11419	4.92	0.05928	708		1	1674		117	40.4844	82.27	6.1e-06	386		0.17251	1433		118
GO:0061515	myeloid cell development	63		27	42.8571	17.69	0.00824	1315		0.0558	684		18	28.5714	11.99	0.04301	1821		0.31989	1998		1	1.5873	2.07	0.87844	4326		0.87844	2032		0	0	1.07	1	6932		1	1675		27	42.8571	17.93	0.01003	1300		0.22673	1641		26
GO:0071322	cellular response to carbohydrate stimulus	112		40	35.7143	31.44	0.04673	2029		0.05583	685		26	23.2143	21.32	0.15582	2730		0.71754	3838		3	2.67857	3.68	0.71642	3868		1	4119		0	0	1.91	1	7127		1	1676		41	36.6071	31.88	0.03726	1873		0.05854	690		38
GO:0036465	synaptic vesicle recycling	54		23	42.5926	15.16	0.01533	1502		0.05587	686		9	16.6667	10.28	0.72382	5712		1	6423		2	3.7037	1.77	0.53318	3283		0.1817	737		1	1.85185	0.92	0.60519	2930		1	1677		21	38.8889	15.37	0.06359	2197		0.05874	694		23
GO:0006941	striated muscle contraction	113		39	34.5133	31.72	0.07901	2341		0.0559	687		28	24.7788	21.51	0.07775	2171		0.08689	817		2	1.76991	3.71	0.88969	4369		1	2407		3	2.65487	1.92	0.30251	1970		1	1678		40	35.3982	32.17	0.06451	2204		0.2269	1644		38
GO:0034123	positive regulation of toll-like receptor signaling pathway	21		13	61.9048	5.9	0.00123	850		0.05591	688		8	38.0952	4	0.03283	1707		0.08712	825		5	23.8095	0.69	0.00049	257		0.0146	128		2	9.52381	0.36	0.04902	660		0.18566	600		14	66.6667	5.98	0.00031	661		0.05861	692		12
GO:0090382	phagosome maturation	18		12	66.6667	5.05	0.00074	782		0.05592	689		7	38.8889	3.43	0.04022	1787		0.08715	828		1	5.55556	0.59	0.45175	3023		1	2413		0	0	0.31	1	7432		1	1679		12	66.6667	5.12	0.00085	783		0.0085	297		12
GO:0072666	establishment of protein localization to vacuole	38		17	44.7368	10.67	0.02056	1619		0.05595	690		12	31.5789	7.23	0.04466	1827		0.08705	823		2	5.26316	1.25	0.35589	2643		1	2409		1	2.63158	0.65	0.47982	2598		1	1680		16	42.1053	10.82	0.04951	2013		0.05876	696		18
GO:0006525	arginine metabolic process	15		10	66.6667	4.21	0.0021	937		0.05598	691		6	40	2.85	0.04929	1883		0.32044	2007		0	0	0.49	1	5108		1	3009		0	0	0.26	1	4286		1	1681		10	66.6667	4.27	0.00236	940		0.05873	693		10
GO:0035590	purinergic nucleotide receptor signaling pathway	27		13	48.1481	7.58	0.02094	1624		0.056	692		8	29.6296	5.14	0.12539	2501		0.08722	832		4	14.8148	0.89	0.01103	527		0.01468	130		2	7.40741	0.46	0.07672	775		0.09766	283		11	40.7407	7.69	0.1167	2576		0.05886	700		13
GO:0036035	osteoclast development	17		10	58.8235	4.77	0.00765	1261		0.05601	693		6	35.2941	3.24	0.08689	2237		0.08723	833		0	0	0.56	1	6251		1	2416		0	0	0.29	1	5723		1	1682		10	58.8235	4.84	0.00851	1234		0.05876	697		10
GO:0034205	amyloid-beta formation	23		10	43.4783	6.46	0.08241	2360		0.0561	694		7	30.4348	4.38	0.13121	2524		0.01415	359		0	0	0.75	1	6107		1	2235		1	4.34783	0.39	0.32656	2072		1	1683		11	47.8261	6.55	0.03805	1882		0.0588	698		10
GO:0002438	acute inflammatory response to antigenic stimulus	17		8	47.0588	4.77	0.07473	2293		0.05612	695		5	29.4118	3.24	0.20959	2976		0.08732	881		1	5.88235	0.56	0.43312	2926		0.43312	1406		1	5.88235	0.29	0.25334	1771		0.25334	752		9	52.9412	4.84	0.02893	1727		0.05882	699		8
GO:0035754	B cell chemotaxis	6		4	66.6667	1.68	0.05617	2110		0.05617	696		3	50	1.14	0.08731	2242		0.08731	838		0	0	0.2	1	6223		1	2420		0	0	0.1	1	5686		1	1684		4	66.6667	1.71	0.05892	2082		0.05892	705		4
GO:0042045	epithelial fluid transport	6		4	66.6667	1.68	0.05617	2111		0.05617	697		1	16.6667	1.14	0.71833	5555		0.71833	3890		1	16.6667	0.2	0.18147	1581		0.18147	709		0	0	0.1	1	5808		1	1685		3	50	1.71	0.22781	3215		0.22781	1669		3
GO:0060056	mammary gland involution	6		4	66.6667	1.68	0.05617	2112		0.05617	698		3	50	1.14	0.08731	2250		0.08731	846		0	0	0.2	1	7036		1	2423		0	0	0.1	1	6704		1	1686		5	83.3333	1.71	0.00854	1258		0.00854	324		4
GO:0046826	negative regulation of protein export from nucleus	6		4	66.6667	1.68	0.05617	2113		0.05617	699		4	66.6667	1.14	0.01414	1364		0.01414	341		1	16.6667	0.2	0.18147	1635		0.18147	656		0	0	0.1	1	6310		1	1687		4	66.6667	1.71	0.05892	2087		0.05892	706		4
GO:0042340	keratan sulfate catabolic process	6		4	66.6667	1.68	0.05617	2114		0.05617	700		4	66.6667	1.14	0.01414	1365		0.01414	342		1	16.6667	0.2	0.18147	1589		0.18147	657		1	16.6667	0.1	0.09793	964		0.09793	290		4	66.6667	1.71	0.05892	2088		0.05892	707		5
GO:1904417	positive regulation of xenophagy	6		4	66.6667	1.68	0.05617	2115		0.05617	701		3	50	1.14	0.08731	2252		0.08731	848		1	16.6667	0.2	0.18147	1607		0.18147	670		NA	NA	NA	NA	NA		NA	7781		3	50	1.71	0.22781	3226		0.22781	1670		4
GO:0042416	dopamine biosynthetic process	6		4	66.6667	1.68	0.05617	2116		0.05617	702		2	33.3333	1.14	0.32087	3667		0.32087	2045		1	16.6667	0.2	0.18147	1591		0.18147	689		0	0	0.1	1	5846		1	1688		2	33.3333	1.71	0.54616	4905		0.54616	3427		3
GO:0046543	development of secondary female sexual characteristics	6		4	66.6667	1.68	0.05617	2117		0.05617	703		4	66.6667	1.14	0.01414	1366		0.01414	343		0	0	0.2	1	6690		1	2229		0	0	0.1	1	6282		1	1689		3	50	1.71	0.22781	3229		0.22781	1671		4
GO:0071763	nuclear membrane organization	6		4	66.6667	1.68	0.05617	2118		0.05617	704		2	33.3333	1.14	0.32087	3669		0.32087	2047		2	33.3333	0.2	0.01476	590		0.01476	138		1	16.6667	0.1	0.09793	965		0.09793	291		3	50	1.71	0.22781	3230		0.22781	1672		4
GO:0002924	negative regulation of humoral immune response mediated by circulating immunoglobulin	6		4	66.6667	1.68	0.05617	2119		0.05617	705		2	33.3333	1.14	0.32087	3670		0.32087	2048		0	0	0.2	1	4933		1	3031		0	0	0.1	1	4057		1	1690		3	50	1.71	0.22781	3231		0.22781	1673		4
GO:0019367	fatty acid elongation, saturated fatty acid	6		4	66.6667	1.68	0.05617	2120		0.05617	706		2	33.3333	1.14	0.32087	3674		0.32087	2052		1	16.6667	0.2	0.18147	1642		0.18147	692		0	0	0.1	1	4978		1	1691		4	66.6667	1.71	0.05892	2091		0.05892	708		3
GO:1905049	negative regulation of metallopeptidase activity	6		4	66.6667	1.68	0.05617	2121		0.05617	707		3	50	1.14	0.08731	2256		0.08731	852		NA	NA	NA	NA	NA		NA	NA		NA	NA	NA	NA	NA		NA	7782		4	66.6667	1.71	0.05892	2093		0.05892	709		4
GO:0040016	embryonic cleavage	6		4	66.6667	1.68	0.05617	2122		0.05617	708		NA	NA	NA	NA	NA		NA	7954		0	0	0.2	1	6309		1	7496		0	0	0.1	1	5795		1	1692		2	33.3333	1.71	0.54616	4914		0.54616	3428		3
GO:0040009	regulation of growth rate	6		4	66.6667	1.68	0.05617	2123		0.05617	709		NA	NA	NA	NA	NA		NA	7953		0	0	0.2	1	6306		1	7495		0	0	0.1	1	5794		1	1693		4	66.6667	1.71	0.05892	2096		0.05892	710		3
GO:0019262	N-acetylneuraminate catabolic process	6		4	66.6667	1.68	0.05617	2124		0.05617	710		4	66.6667	1.14	0.01414	1370		0.01414	347		0	0	0.2	1	5644		1	2232		0	0	0.1	1	4969		1	1694		4	66.6667	1.71	0.05892	2097		0.05892	711		4
GO:0032020	ISG15-protein conjugation	6		4	66.6667	1.68	0.05617	2125		0.05617	711		5	83.3333	1.14	0.00126	814		0.00126	132		2	33.3333	0.2	0.01476	582		0.01476	135		4	66.6667	0.1	1.2e-06	51		1.2e-06	7		3	50	1.71	0.22781	3240		0.22781	1674		4
GO:1905165	regulation of lysosomal protein catabolic process	6		4	66.6667	1.68	0.05617	2126		0.05617	712		4	66.6667	1.14	0.01414	1371		0.01414	348		NA	NA	NA	NA	NA		NA	NA		NA	NA	NA	NA	NA		NA	7783		4	66.6667	1.71	0.05892	2100		0.05892	712		3
GO:1900227	positive regulation of NLRP3 inflammasome complex assembly	6		4	66.6667	1.68	0.05617	2127		0.05617	713		4	66.6667	1.14	0.01414	1373		0.01414	350		1	16.6667	0.2	0.18147	1596		0.18147	659		0	0	0.1	1	7671		1	1695		4	66.6667	1.71	0.05892	2101		0.05892	713		4
GO:1900244	positive regulation of synaptic vesicle endocytosis	6		4	66.6667	1.68	0.05617	2128		0.05617	714		2	33.3333	1.14	0.32087	3696		0.32087	2074		1	16.6667	0.2	0.18147	1598		0.18147	696		0	0	0.1	1	7674		1	1696		4	66.6667	1.71	0.05892	2102		0.05892	714		3
GO:2000562	negative regulation of CD4-positive, alpha-beta T cell proliferation	6		4	66.6667	1.68	0.05617	2129		0.05617	715		4	66.6667	1.14	0.01414	1374		0.01414	351		1	16.6667	0.2	0.18147	1631		0.18147	660		1	16.6667	0.1	0.09793	950		0.09793	292		4	66.6667	1.71	0.05892	2103		0.05892	715		4
GO:0000920	septum digestion after cytokinesis	6		4	66.6667	1.68	0.05617	2130		0.05617	716		3	50	1.14	0.08731	2264		0.08731	860		0	0	0.2	1	4790		1	2429		0	0	0.1	1	3819		1	1697		4	66.6667	1.71	0.05892	2105		0.05892	716		4
GO:0032364	oxygen homeostasis	6		4	66.6667	1.68	0.05617	2131		0.05617	717		1	16.6667	1.14	0.71833	5617		0.71833	3952		0	0	0.2	1	5933		1	4198		0	0	0.1	1	5344		1	1698		4	66.6667	1.71	0.05892	2106		0.05892	717		4
GO:0001866	NK T cell proliferation	6		4	66.6667	1.68	0.05617	2132		0.05617	718		4	66.6667	1.14	0.01414	1375		0.01414	352		1	16.6667	0.2	0.18147	1615		0.18147	661		1	16.6667	0.1	0.09793	926		0.09793	293		4	66.6667	1.71	0.05892	2107		0.05892	718		4
GO:0034379	very-low-density lipoprotein particle assembly	6		4	66.6667	1.68	0.05617	2133		0.05617	719		3	50	1.14	0.08731	2268		0.08731	864		0	0	0.2	1	6126		1	2432		0	0	0.1	1	5561		1	1699		4	66.6667	1.71	0.05892	2108		0.05892	719		4
GO:0055118	negative regulation of cardiac muscle contraction	6		4	66.6667	1.68	0.05617	2134		0.05617	720		3	50	1.14	0.08731	2271		0.08731	867		0	0	0.2	1	7017		1	2434		0	0	0.1	1	6680		1	1700		4	66.6667	1.71	0.05892	2110		0.05892	720		4
GO:0034201	response to oleic acid	6		4	66.6667	1.68	0.05617	2135		0.05617	721		4	66.6667	1.14	0.01414	1378		0.01414	355		0	0	0.2	1	6106		1	2234		0	0	0.1	1	5544		1	1701		4	66.6667	1.71	0.05892	2114		0.05892	721		4
GO:0043320	natural killer cell degranulation	6		4	66.6667	1.68	0.05617	2136		0.05617	722		1	16.6667	1.14	0.71833	5648		0.71833	3983		0	0	0.2	1	6430		1	4222		0	0	0.1	1	5944		1	1702		4	66.6667	1.71	0.05892	2115		0.05892	722		4
GO:0010994	free ubiquitin chain polymerization	6		4	66.6667	1.68	0.05617	2137		0.05617	723		4	66.6667	1.14	0.01414	1379		0.01414	356		1	16.6667	0.2	0.18147	1603		0.18147	662		0	0	0.1	1	4774		1	1703		4	66.6667	1.71	0.05892	2116		0.05892	723		4
GO:1901525	negative regulation of mitophagy	6		4	66.6667	1.68	0.05617	2138		0.05617	724		3	50	1.14	0.08731	2278		0.08731	874		NA	NA	NA	NA	NA		NA	NA		0	0	0.1	1	7734		1	1704		4	66.6667	1.71	0.05892	2117		0.05892	724		4
GO:0098974	postsynaptic actin cytoskeleton organization	6		4	66.6667	1.68	0.05617	2139		0.05617	725		3	50	1.14	0.08731	2280		0.08731	876		0	0	0.2	1	7728		1	2435		0	0	0.1	1	7567		1	1705		4	66.6667	1.71	0.05892	2118		0.05892	725		4
GO:0034625	fatty acid elongation, monounsaturated fatty acid	6		4	66.6667	1.68	0.05617	2140		0.05617	726		2	33.3333	1.14	0.32087	3730		0.32087	2108		1	16.6667	0.2	0.18147	1609		0.18147	705		0	0	0.1	1	5584		1	1706		4	66.6667	1.71	0.05892	2119		0.05892	726		3
GO:0034626	fatty acid elongation, polyunsaturated fatty acid	6		4	66.6667	1.68	0.05617	2141		0.05617	727		2	33.3333	1.14	0.32087	3731		0.32087	2109		1	16.6667	0.2	0.18147	1610		0.18147	706		0	0	0.1	1	5585		1	1707		4	66.6667	1.71	0.05892	2120		0.05892	727		3
GO:0035434	copper ion transmembrane transport	6		4	66.6667	1.68	0.05617	2142		0.05617	728		3	50	1.14	0.08731	2281		0.08731	877		1	16.6667	0.2	0.18147	1624		0.18147	682		1	16.6667	0.1	0.09793	940		0.09793	294		4	66.6667	1.71	0.05892	2121		0.05892	728		4
GO:0035357	peroxisome proliferator activated receptor signaling pathway	17		7	41.1765	4.77	0.17375	3071		0.05617	729		5	29.4118	3.24	0.20959	2977		0.08732	882		1	5.88235	0.56	0.43312	2948		1	2439		0	0	0.29	1	5646		1	1708		6	35.2941	4.84	0.34901	3834		0.22783	1747		7
GO:0045723	positive regulation of fatty acid biosynthetic process	11		5	45.4545	3.09	0.16982	2993		0.05619	730		3	27.2727	2.09	0.35048	3851		0.32086	2020		0	0	0.36	1	6604		1	3018		1	9.09091	0.19	0.17221	1380		0.17221	562		5	45.4545	3.13	0.17775	2969		0.05894	743		5
GO:0046931	pore complex assembly	15		5	33.3333	4.21	0.41795	4227		0.05625	731		3	20	2.85	0.56493	4728		0.56493	3074		3	20	0.49	0.0119	539		0.01472	131		0	0	0.26	1	6326		1	1709		5	33.3333	4.27	0.43161	4219		0.05901	745		5
GO:0018195	peptidyl-arginine modification	19		5	26.3158	5.33	0.65255	5438		0.05631	732		5	26.3158	3.62	0.28759	3452		0.08735	887		0	0	0.62	1	5616		1	2441		0	0	0.32	1	4941		1	1710		5	26.3158	5.41	0.66655	5564		0.05907	746		5
GO:0050870	positive regulation of T cell activation	183		78	42.623	51.37	1.5e-05	441		0.05658	733		60	32.7869	34.83	5.9e-06	374		0.00866	294		17	9.28962	6.01	0.00011	182		0.0634	300		8	4.37158	3.12	0.01313	408		0.54666	1123		78	42.623	52.1	2.6e-05	478		0.17394	1435		78
GO:0006457	protein folding	189		63	33.3333	53.06	0.06354	2216		0.05666	734		47	24.8677	35.97	0.02749	1618		0.41221	2579		4	2.1164	6.2	0.87211	4304		0.79313	1969		2	1.0582	3.22	0.8357	3410		0.88837	1328		66	34.9206	53.8	0.0305	1780		0.01719	381		58
GO:0032940	secretion by cell	1212		589	48.5974	340.24	< 1e-30	20		0.05681	735		420	34.6535	230.67	< 1e-30	28		0.19635	1520		81	6.68317	39.77	3e-10	58		0.27954	1011		38	3.13531	20.64	0.00016	104		0.25849	768		596	49.1749	345.03	< 1e-30	21		0.0601	748		572
GO:0006903	vesicle targeting	91		46	50.5495	25.55	4.5e-06	386		0.05703	736		27	29.6703	17.32	0.00935	1262		0.34822	2324		8	8.79121	2.99	0.00996	510		0.50009	1534		2	2.1978	1.55	0.46079	2534		1	1711		44	48.3516	25.91	4.4e-05	510		0.17519	1436		44
GO:0045022	early endosome to late endosome transport	36		17	47.2222	10.11	0.01111	1384		0.05724	737		11	30.5556	6.85	0.06612	2054		0.28674	1883		0	0	1.18	1	6532		1	2956		0	0	0.61	1	6068		1	1712		18	50	10.25	0.00507	1092		0.02249	420		16
GO:0045742	positive regulation of epidermal growth factor receptor signaling pathway	28		14	50	7.86	0.01135	1396		0.0573	738		7	25	5.33	0.27505	3426		0.50161	2920		1	3.57143	0.92	0.60753	3545		1	3553		0	0	0.48	1	6156		1	1713		13	46.4286	7.97	0.03267	1797		0.14369	1350		15
GO:0060135	maternal process involved in female pregnancy	46		18	39.1304	12.91	0.06896	2269		0.0574	739		11	23.913	8.75	0.24876	3328		0.13642	1098		4	8.69565	1.51	0.06335	1011		0.17267	627		2	4.34783	0.78	0.18438	1435		0.32581	881		19	41.3043	13.1	0.04177	1903		0.06213	772		17
GO:0008306	associative learning	55		20	36.3636	15.44	0.11267	2597		0.05745	740		9	16.3636	10.47	0.7445	5817		0.05404	684		0	0	1.8	1	5278		1	2363		1	1.81818	0.94	0.61194	2946		0.61194	1173		18	32.7273	15.66	0.28563	3548		0.28101	1914		19
GO:1904886	beta-catenin destruction complex disassembly	19		9	47.3684	5.33	0.05753	2151		0.05753	741		5	26.3158	3.62	0.28759	3456		0.28759	1888		NA	NA	NA	NA	NA		NA	NA		NA	NA	NA	NA	NA		NA	7784		10	52.6316	5.41	0.02262	1570		0.02262	422		9
GO:0042572	retinol metabolic process	19		9	47.3684	5.33	0.05753	2152		0.05753	742		5	26.3158	3.62	0.28759	3457		0.28759	1889		1	5.26316	0.62	0.46977	3063		0.46977	1488		1	5.26316	0.32	0.27859	1872		0.27859	808		9	47.3684	5.41	0.06236	2176		0.06236	776		9
GO:0006335	DNA replication-dependent nucleosome assembly	19		9	47.3684	5.33	0.05753	2153		0.05753	743		5	26.3158	3.62	0.28759	3459		0.28759	1891		0	0	0.62	1	5065		1	2958		0	0	0.32	1	4237		1	1714		9	47.3684	5.41	0.06236	2177		0.06236	777		9
GO:0006672	ceramide metabolic process	72		29	40.2778	20.21	0.01686	1548		0.05787	744		25	34.7222	13.7	0.00119	802		0.04097	574		6	8.33333	2.36	0.03055	791		0.30548	1098		1	1.38889	1.23	0.71062	3167		1	1715		30	41.6667	20.5	0.01095	1323		0.06154	751		27
GO:0097755	positive regulation of blood vessel diameter	39		17	43.5897	10.95	0.02713	1781		0.05807	745		10	25.641	7.42	0.19452	2938		0.14018	1119		7	17.9487	1.28	0.00024	211		0.30421	1097		2	5.12821	0.66	0.14224	1185		0.25272	747		17	43.5897	11.1	0.03093	1783		0.06181	756		17
GO:0042053	regulation of dopamine metabolic process	16		9	56.25	4.49	0.0165	1526		0.05818	746		4	25	3.05	0.36318	3903		0.35047	2342		0	0	0.53	1	6323		1	3215		0	0	0.27	1	5810		1	1716		7	43.75	4.55	0.14109	2698		0.17766	1448		8
GO:0002675	positive regulation of acute inflammatory response	24		10	41.6667	6.74	0.10703	2567		0.05827	747		8	33.3333	4.57	0.06995	2094		0.14004	1110		0	0	0.79	1	4909		1	2543		0	0	0.41	1	4014		1	1717		10	41.6667	6.83	0.11555	2567		0.06202	760		9
GO:0031629	synaptic vesicle fusion to presynaptic active zone membrane	18		8	44.4444	5.05	0.10251	2534		0.05829	748		5	27.7778	3.43	0.2478	3313		0.2478	1827		2	11.1111	0.59	0.11645	1293		0.11645	442		1	5.55556	0.31	0.26607	1823		0.26607	786		8	44.4444	5.12	0.1097	2537		0.06204	761		8
GO:0042447	hormone catabolic process	11		6	54.5455	3.09	0.05829	2164		0.05829	749		4	36.3636	2.09	0.14029	2654		0.14029	1130		2	18.1818	0.36	0.04858	919		0.04858	270		0	0	0.19	1	5856		1	1718		6	54.5455	3.13	0.06204	2150		0.06204	762		6
GO:0007194	negative regulation of adenylate cyclase activity	11		6	54.5455	3.09	0.05829	2165		0.05829	750		4	36.3636	2.09	0.14029	2657		0.14029	1133		2	18.1818	0.36	0.04858	922		0.04858	272		0	0	0.19	1	4436		1	1719		6	54.5455	3.13	0.06204	2151		0.06204	763		5
GO:0010759	positive regulation of macrophage chemotaxis	11		6	54.5455	3.09	0.05829	2166		0.05829	751		6	54.5455	2.09	0.00906	1250		0.00906	303		1	9.09091	0.36	0.30732	2352		0.30732	1109		2	18.1818	0.19	0.01435	426		0.01435	93		6	54.5455	3.13	0.06204	2153		0.06204	764		6
GO:2001204	regulation of osteoclast development	11		6	54.5455	3.09	0.05829	2167		0.05829	752		3	27.2727	2.09	0.35048	3870		0.35048	2360		NA	NA	NA	NA	NA		NA	NA		NA	NA	NA	NA	NA		NA	7785		6	54.5455	3.13	0.06204	2154		0.06204	765		6
GO:0045717	negative regulation of fatty acid biosynthetic process	11		6	54.5455	3.09	0.05829	2168		0.05829	753		2	18.1818	2.09	0.64856	5046		0.64856	3406		0	0	0.36	1	6600		1	3846		0	0	0.19	1	6143		1	1720		6	54.5455	3.13	0.06204	2155		0.06204	766		6
GO:0032740	positive regulation of interleukin-17 production	11		6	54.5455	3.09	0.05829	2169		0.05829	754		5	45.4545	2.09	0.04153	1803		0.04153	580		1	9.09091	0.36	0.30732	2366		0.30732	1110		1	9.09091	0.19	0.17221	1377		0.17221	563		6	54.5455	3.13	0.06204	2156		0.06204	767		6
GO:0032700	negative regulation of interleukin-17 production	11		6	54.5455	3.09	0.05829	2170		0.05829	755		6	54.5455	2.09	0.00906	1252		0.00906	305		0	0	0.36	1	5971		1	2220		0	0	0.19	1	5389		1	1721		6	54.5455	3.13	0.06204	2157		0.06204	768		6
GO:0048384	retinoic acid receptor signaling pathway	24		9	37.5	6.74	0.20807	3160		0.05834	756		6	25	4.57	0.29961	3563		0.29961	1954		1	4.16667	0.79	0.55137	3343		0.55137	1648		1	4.16667	0.41	0.33805	2101		0.33805	903		8	33.3333	6.83	0.37024	3932		0.06217	773		9
GO:0050673	epithelial cell proliferation	274		79	28.8321	76.92	0.41145	4208		0.05835	757		58	21.1679	52.15	0.20125	2960		0.34918	2328		9	3.28467	8.99	0.54685	3337		0.48748	1531		5	1.82482	4.67	0.50139	2666		0.08763	273		84	30.6569	78	0.22717	3200		0.0618	755		75
GO:0044319	wound healing, spreading of cells	24		8	33.3333	6.74	0.35377	3909		0.05841	758		9	37.5	4.57	0.02682	1613		0.00905	301		0	0	0.79	1	6493		1	2217		1	4.16667	0.41	0.33805	2109		1	1722		8	33.3333	6.83	0.37024	3933		0.06217	774		8
GO:0042493	response to drug	739		238	32.2057	207.46	0.00611	1184		0.06019	759		175	23.6806	140.65	0.00071	730		0.02443	443		30	4.05954	24.25	0.13334	1349		0.08535	370		22	2.977	12.58	0.00763	332		0.10065	337		255	34.5061	210.37	0.00013	594		0.00089	125		229
GO:0030036	actin cytoskeleton organization	524		204	38.9313	147.1	2.8e-08	222		0.06087	760		122	23.2824	99.73	0.00768	1177		0.76192	4130		17	3.24427	17.2	0.55529	3371		0.73679	1906		5	0.954198	8.92	0.94731	3613		1	1723		192	36.6412	149.17	2.1e-05	461		0.4227	2688		202
GO:0072583	clathrin-dependent endocytosis	36		17	47.2222	10.11	0.01111	1385		0.06126	761		5	13.8889	6.85	0.84186	6369		0.81838	4500		0	0	1.18	1	7503		1	4558		0	0	0.61	1	7304		1	1724		15	41.6667	10.25	0.06144	2141		0.14504	1358		14
GO:0032753	positive regulation of interleukin-4 production	22		10	45.4545	6.18	0.06158	2197		0.06158	762		8	36.3636	4.19	0.04323	1823		0.04323	583		1	4.54545	0.72	0.52035	3240		0.52035	1574		1	4.54545	0.37	0.31487	2014		0.31487	862		10	45.4545	6.26	0.06704	2210		0.06704	781		10
GO:0009306	protein secretion	423		173	40.8983	118.75	5.5e-09	193		0.06197	763		124	29.3144	80.51	1.4e-07	249		0.29563	1948		35	8.27423	13.88	4.7e-07	99		0.35599	1260		10	2.36407	7.2	0.18572	1441		0.48471	1073		175	41.3712	120.42	5e-09	167		0.13006	1178		167
GO:0007160	cell-matrix adhesion	172		60	34.8837	48.29	0.02954	1798		0.06218	764		38	22.093	32.74	0.17501	2821		0.39354	2427		3	1.74419	5.64	0.92488	4460		0.65392	1787		1	0.581395	2.93	0.9489	3617		0.9489	1350		61	35.4651	48.96	0.02662	1704		0.02413	488		57
GO:0032981	mitochondrial respiratory chain complex I assembly	64		24	37.5	17.97	0.06421	2219		0.06421	765		26	40.625	12.18	5.1e-05	478		5.1e-05	51		0	0	2.1	1	6014		1	2158		1	1.5625	1.09	0.66775	3074		0.66775	1217		26	40.625	18.22	0.02421	1639		0.02421	490		23
GO:0035987	endodermal cell differentiation	35		14	40	9.83	0.08614	2393		0.06449	766		4	11.4286	6.66	0.92174	6905		0.92174	4906		0	0	1.15	1	6248		1	4810		0	0	0.6	1	5717		1	1725		12	34.2857	9.96	0.27642	3521		0.14574	1360		14
GO:0042036	negative regulation of cytokine biosynthetic process	25		11	44	7.02	0.06451	2221		0.06451	767		4	16	4.76	0.72816	5721		0.72816	4039		0	0	0.82	1	6321		1	4262		0	0	0.43	1	5806		1	1726		10	40	7.12	0.14557	2840		0.14557	1359		10
GO:0046835	carbohydrate phosphorylation	25		11	44	7.02	0.06451	2222		0.06451	768		7	28	4.76	0.18366	2920		0.18366	1372		0	0	0.82	1	6714		1	2663		0	0	0.43	1	6314		1	1727		12	48	7.12	0.02986	1765		0.02986	552		11
GO:0071356	cellular response to tumor necrosis factor	188		72	38.2979	52.78	0.00143	871		0.06563	769		57	30.3191	35.78	0.00012	549		0.10742	991		14	7.44681	6.17	0.00365	388		0.00447	77		4	2.12766	3.2	0.39844	2347		0.39844	978		71	37.766	53.52	0.00345	1019		0.11729	1143		70
GO:0032103	positive regulation of response to external stimulus	443		204	46.0497	124.36	2e-16	77		0.06567	770		162	36.5688	84.31	9.4e-19	66		0.55694	3060		45	10.158	14.54	1.3e-11	47		1	3625		21	4.74041	7.54	2.2e-05	69		1	1728		203	45.8239	126.11	2.2e-15	75		0.06844	783		198
GO:0008544	epidermis development	214		53	24.7664	60.08	0.87828	6717		0.0658	771		30	14.0187	40.73	0.97889	7334		0.53537	3038		4	1.86916	7.02	0.92451	4459		0.90482	2061		1	0.46729	3.64	0.97543	3671		1	1729		52	24.2991	60.92	0.92671	7135		0.07212	801		52
GO:0045088	regulation of innate immune response	315		162	51.4286	88.43	7.6e-19	66		0.06603	772		131	41.5873	59.95	7.7e-21	60		0.15787	1172		45	14.2857	10.34	4.6e-17	25		1	2560		14	4.44444	5.36	0.00101	168		1	1730		161	51.1111	89.67	9.1e-18	60		0.06877	784		159
GO:0051050	positive regulation of transport	740		276	37.2973	207.74	1.3e-08	213		0.06618	773		197	26.6216	140.84	1.2e-07	244		0.02209	414		40	5.40541	24.28	0.00129	309		1	2247		20	2.7027	12.6	0.02756	525		0.36158	937		274	37.027	210.66	1.3e-07	239		0.31242	2237		268
GO:0038061	NIK/NF-kappaB signaling	103		50	48.5437	28.91	7.8e-06	411		0.06639	774		34	33.0097	19.6	0.00051	687		0.10798	993		5	4.85437	3.38	0.2497	2062		0.3726	1273		4	3.8835	1.75	0.09895	974		0.21252	664		48	46.6019	29.32	6.7e-05	545		0.02241	419		48
GO:0070207	protein homotrimerization	28		12	42.8571	7.86	0.06659	2231		0.06659	775		9	32.1429	5.33	0.06936	2084		0.06936	736		2	7.14286	0.92	0.23385	1919		0.23385	856		0	0	0.48	1	6993		1	1731		12	42.8571	7.97	0.0731	2245		0.0731	844		12
GO:0043436	oxoacid metabolic process	851		290	34.0776	238.9	4.3e-05	517		0.06709	776		196	23.0317	161.97	0.00149	850		0.94533	4989		26	3.05523	27.93	0.67805	3755		1	4860		12	1.41011	14.49	0.79038	3311		1	1732		297	34.9001	242.26	1.4e-05	429		0.06954	786		288
GO:1903076	regulation of protein localization to plasma membrane	78		32	41.0256	21.9	0.0092	1334		0.06738	777		28	35.8974	14.85	0.00034	648		0.00167	146		2	2.5641	2.56	0.73081	3929		1	2176		2	2.5641	1.33	0.38445	2301		1	1733		32	41.0256	22.2	0.0114	1336		0.0721	798		30
GO:0019835	cytolysis	21		12	57.1429	5.9	0.00484	1123		0.06774	778		9	42.8571	4	0.01037	1274		0.03497	519		5	23.8095	0.69	0.00049	256		0.00087	44		1	4.7619	0.36	0.30298	1973		0.30298	843		11	52.381	5.98	0.01775	1471		0.18177	1479		12
GO:0050768	negative regulation of neurogenesis	204		63	30.8824	57.27	0.20462	3153		0.06777	779		41	20.098	38.83	0.37558	3958		0.26869	1857		10	4.90196	6.69	0.13467	1353		1	2946		9	4.41176	3.47	0.00827	339		0.40579	988		64	31.3725	58.07	0.1972	3112		0.07246	814		59
GO:0016311	dephosphorylation	405		118	29.1358	113.69	0.33223	3811		0.06795	780		78	19.2593	77.08	0.4736	4426		0.05749	696		11	2.71605	13.29	0.78105	4061		0.71299	1871		5	1.23457	6.9	0.82406	3379		0.72795	1257		115	28.3951	115.29	0.53238	4840		0.2964	2157		116
GO:0017156	calcium ion regulated exocytosis	109		35	32.1101	30.6	0.20055	3136		0.06797	781		23	21.1009	20.75	0.32638	3771		0.01909	398		9	8.25688	3.58	0.0096	498		0.00464	79		6	5.50459	1.86	0.01078	379		0.09531	278		34	31.1927	31.03	0.29556	3586		0.07512	851		34
GO:0035235	ionotropic glutamate receptor signaling pathway	14		7	50	3.93	0.06802	2244		0.06802	782		5	35.7143	2.66	0.10982	2417		0.10982	1004		1	7.14286	0.46	0.37336	2698		0.37336	1282		0	0	0.24	1	5626		1	1734		8	57.1429	3.99	0.02296	1611		0.02296	463		7
GO:0030889	negative regulation of B cell proliferation	14		7	50	3.93	0.06802	2245		0.06802	783		3	21.4286	2.66	0.51509	4519		0.51509	2940		1	7.14286	0.46	0.37336	2686		0.37336	1293		0	0	0.24	1	5173		1	1735		6	42.8571	3.99	0.1823	3033		0.1823	1484		7
GO:0030813	positive regulation of nucleotide catabolic process	14		7	50	3.93	0.06802	2246		0.06802	784		3	21.4286	2.66	0.51509	4520		0.51509	2941		1	7.14286	0.46	0.37336	2687		0.37336	1294		0	0	0.24	1	5158		1	1736		7	50	3.99	0.07274	2229		0.07274	836		7
GO:1902187	negative regulation of viral release from host cell	14		7	50	3.93	0.06802	2247		0.06802	785		6	42.8571	2.66	0.03508	1742		0.03508	526		2	14.2857	0.46	0.07538	1071		0.07538	351		1	7.14286	0.24	0.21382	1580		0.21382	669		7	50	3.99	0.07274	2230		0.07274	837		7
GO:0034755	iron ion transmembrane transport	14		7	50	3.93	0.06802	2248		0.06802	786		4	28.5714	2.66	0.26891	3396		0.26891	1869		0	0	0.46	1	6161		1	2953		1	7.14286	0.24	0.21382	1570		0.21382	670		7	50	3.99	0.07274	2233		0.07274	838		7
GO:0032695	negative regulation of interleukin-12 production	14		7	50	3.93	0.06802	2249		0.06802	787		8	57.1429	2.66	0.0017	867		0.0017	151		2	14.2857	0.46	0.07538	1070		0.07538	348		0	0	0.24	1	5388		1	1737		7	50	3.99	0.07274	2234		0.07274	839		7
GO:0032688	negative regulation of interferon-beta production	14		7	50	3.93	0.06802	2250		0.06802	788		5	35.7143	2.66	0.10982	2420		0.10982	1007		0	0	0.46	1	5970		1	2500		0	0	0.24	1	5386		1	1738		6	42.8571	3.99	0.1823	3038		0.1823	1485		7
GO:0010256	endomembrane system organization	370		137	37.027	103.87	9.3e-05	572		0.06815	789		95	25.6757	70.42	0.00088	749		0.16332	1181		20	5.40541	12.14	0.02009	673		1	2564		3	0.810811	6.3	0.9537	3628		1	1739		144	38.9189	105.33	7.1e-06	393		0.07052	790		130
GO:0007193	adenylate cyclase-inhibiting G protein-coupled receptor signaling pathway	49		19	38.7755	13.76	0.06843	2262		0.06843	790		10	20.4082	9.33	0.45977	4273		0.45977	2640		3	6.12245	1.61	0.21677	1867		0.21677	846		0	0	0.83	1	4435		1	1740		18	36.7347	13.95	0.13097	2646		0.13097	1179		18
GO:0051591	response to cAMP	77		31	40.2597	21.62	0.0139	1467		0.06862	791		19	24.6753	14.66	0.13258	2590		0.03677	568		5	6.49351	2.53	0.10848	1263		0.03224	213		4	5.19481	1.31	0.04224	623		0.04224	155		30	38.961	21.92	0.03	1773		0.07647	854		29
GO:1990266	neutrophil migration	82		46	56.0976	23.02	8.8e-08	246		0.06872	792		35	42.6829	15.61	6.9e-07	295		0.16399	1185		2	2.43902	2.69	0.75581	3997		1	2567		7	8.53659	1.4	0.00049	141		1	1741		44	53.6585	23.34	1.4e-06	314		0.31868	2328		45
GO:0019674	NAD metabolic process	63		27	42.8571	17.69	0.00824	1316		0.06876	793		21	33.3333	11.99	0.00495	1060		0.06319	719		4	6.34921	2.07	0.15187	1417		0.15187	509		1	1.5873	1.07	0.66197	3063		0.66197	1214		28	44.4444	17.93	0.00485	1086		0.03946	597		26
GO:1902903	regulation of supramolecular fiber organization	289		103	35.6401	81.13	0.00277	1010		0.06876	794		65	22.4913	55	0.07711	2170		0.16506	1197		8	2.76817	9.48	0.73693	3941		1	2573		3	1.03806	4.92	0.87362	3473		1	1742		99	34.2561	82.27	0.01739	1459		0.31918	2334		101
GO:0071621	granulocyte chemotaxis	85		44	51.7647	23.86	3.2e-06	372		0.06887	795		37	43.5294	16.18	1.8e-07	259		0.16382	1184		3	3.52941	2.79	0.53179	3281		1	2566		8	9.41176	1.45	9.7e-05	92		1	1743		45	52.9412	24.2	1.7e-06	321		0.07152	792		43
GO:0009615	response to virus	268		129	48.1343	75.23	1.6e-12	115		0.06903	796		115	42.9104	51.01	1e-19	64		0.0015	142		51	19.0299	8.8	5e-25	12		0.09739	417		35	13.0597	4.56	2.5e-21	13		0.01141	82		126	47.0149	76.29	6.1e-11	127		0.02539	530		129
GO:0051651	maintenance of location in cell	179		66	36.8715	50.25	0.00623	1194		0.06909	797		50	27.933	34.07	0.00228	916		0.77325	4277		7	3.91061	5.87	0.37298	2678		1	4415		8	4.46927	3.05	0.0116	387		0.02233	109		69	38.5475	50.96	0.00216	916		0.00645	250		67
GO:0030705	cytoskeleton-dependent intracellular transport	164		36	21.9512	46.04	0.96981	7464		0.06922	798		26	15.8537	31.21	0.87519	6556		0.27063	1875		4	2.43902	5.38	0.79111	4082		0.37473	1305		2	1.21951	2.79	0.77223	3273		1	1744		36	21.9512	46.69	0.9766	7605		0.07406	849		35
GO:0008333	endosome to lysosome transport	49		19	38.7755	13.76	0.06843	2263		0.06926	799		12	24.4898	9.33	0.20983	2994		0.18145	1310		2	4.08163	1.61	0.48129	3105		0.48129	1505		1	2.04082	0.83	0.56964	2837		0.56964	1138		21	42.8571	13.95	0.02165	1562		0.04081	598		19
GO:0044706	multi-multicellular organism process	158		57	36.0759	44.35	0.01685	1547		0.06926	800		41	25.9494	30.07	0.01945	1485		0.02338	419		8	5.06329	5.19	0.14872	1397		0.48514	1510		6	3.79747	2.69	0.05326	673		1	1745		62	39.2405	44.98	0.00216	915		0.07172	793		56
GO:0045123	cellular extravasation	49		26	53.0612	13.76	0.00019	630		0.06929	801		18	36.7347	9.33	0.00277	956		0.56888	3094		2	4.08163	1.61	0.48129	3110		1	3649		2	4.08163	0.83	0.20296	1546		1	1746		24	48.9796	13.95	0.00185	894		0.07211	799		26
GO:0015980	energy derivation by oxidation of organic compounds	241		78	32.3651	67.66	0.07851	2340		0.06938	802		64	26.556	45.87	0.00243	938		0.02318	418		6	2.48963	7.91	0.80744	4133		1	2248		3	1.24481	4.1	0.78195	3291		1	1747		79	32.7801	68.61	0.07834	2277		0.07208	797		78
GO:0061041	regulation of wound healing	96		37	38.5417	26.95	0.0167	1543		0.0694	803		25	26.0417	18.27	0.05599	1986		0.5692	3099		12	12.5	3.15	6.9e-05	168		1	3653		5	5.20833	1.63	0.02398	507		1	1748		43	44.7917	27.33	0.00046	702		0.0718	794		36
GO:0071320	cellular response to cAMP	40		16	40	11.23	0.06945	2276		0.06945	804		7	17.5	7.61	0.6605	5355		0.6605	3731		1	2.5	1.31	0.73731	3946		0.73731	1917		0	0	0.68	1	7125		1	1749		15	37.5	11.39	0.13802	2682		0.13802	1213		14
GO:0045912	negative regulation of carbohydrate metabolic process	37		18	48.6486	10.39	0.00621	1189		0.06953	805		11	29.7297	7.04	0.07856	2178		0.56966	3110		1	2.7027	1.21	0.70956	3851		1	3664		0	0	0.63	1	6200		1	1750		17	45.9459	10.53	0.01758	1465		0.0723	804		18
GO:0034763	negative regulation of transmembrane transport	84		31	36.9048	23.58	0.0486	2038		0.06954	806		25	29.7619	15.99	0.0116	1301		0.16519	1204		3	3.57143	2.76	0.52378	3266		0.43328	1419		2	2.38095	1.43	0.42032	2414		1	1751		31	36.9048	23.91	0.05756	2070		0.07226	803		33
GO:0032412	regulation of ion transmembrane transporter activity	166		53	31.9277	46.6	0.15263	2877		0.06959	807		37	22.2892	31.59	0.1641	2756		0.16561	1209		4	2.40964	5.45	0.79884	4100		1	2579		5	3.01205	2.83	0.15368	1257		1	1752		52	31.3253	47.26	0.2296	3301		0.32084	2360		54
GO:0060713	labyrinthine layer morphogenesis	13		10	76.9231	3.65	0.00036	682		0.0696	808		6	46.1538	2.47	0.0238	1551		1	6414		1	7.69231	0.43	0.35208	2604		1	6084		0	0	0.22	1	6832		1	1753		8	61.5385	3.7	0.01306	1368		0.32091	2363		10
GO:0030865	cortical cytoskeleton organization	44		18	40.9091	12.35	0.04529	2017		0.06963	809		12	27.2727	8.37	0.11703	2463		0.56971	3113		4	9.09091	1.44	0.05541	969		0.12449	458		1	2.27273	0.75	0.5309	2735		0.5309	1114		16	36.3636	12.53	0.15953	2876		0.32102	2369		17
GO:0019217	regulation of fatty acid metabolic process	62		23	37.0968	17.41	0.07704	2334		0.06964	810		16	25.8065	11.8	0.11723	2469		0.16575	1215		0	0	2.03	1	5639		1	2584		1	1.6129	1.06	0.65609	3055		1	1754		23	37.0968	17.65	0.08787	2345		0.00654	253		24
GO:0022406	membrane docking	169		53	31.3609	47.44	0.19095	3121		0.06964	811		42	24.8521	32.16	0.03589	1760		0.0013	135		9	5.32544	5.55	0.10463	1231		1	2173		2	1.18343	2.88	0.78642	3297		1	1755		58	34.3195	48.11	0.05543	2044		0.07211	800		54
GO:0045661	regulation of myoblast differentiation	34		15	44.1176	9.54	0.03284	1829		0.06964	812		11	32.3529	6.47	0.04524	1837		0.56956	3106		0	0	1.12	1	6589		1	3660		2	5.88235	0.58	0.11364	1058		1	1756		14	41.1765	9.68	0.07622	2263		0.07241	811		14
GO:0071800	podosome assembly	17		10	58.8235	4.77	0.00765	1262		0.06966	813		10	58.8235	3.24	0.00032	645		0.0235	423		0	0	0.56	1	7431		1	2252		0	0	0.29	1	7198		1	1757		10	58.8235	4.84	0.00851	1235		0.07237	806		12
GO:0034104	negative regulation of tissue remodeling	12		8	66.6667	3.37	0.00609	1176		0.06969	814		3	25	2.28	0.40721	4110		0.57019	3160		1	8.33333	0.39	0.33007	2504		1	3700		1	8.33333	0.2	0.18632	1450		0.18632	607		8	66.6667	3.42	0.00668	1159		0.0724	810		8
GO:0001844	protein insertion into mitochondrial membrane involved in apoptotic signaling pathway	28		12	42.8571	7.86	0.06659	2232		0.06971	815		8	28.5714	5.33	0.1478	2702		0.16593	1225		1	3.57143	0.92	0.60753	3541		1	2591		0	0	0.48	1	3884		1	1758		12	42.8571	7.97	0.0731	2244		0.07243	813		12
GO:0035751	regulation of lysosomal lumen pH	11		7	63.6364	3.09	0.0148	1488		0.06972	816		5	45.4545	2.09	0.04153	1808		0.56983	3119		1	9.09091	0.36	0.30732	2374		0.30732	1126		1	9.09091	0.19	0.17221	1402		1	1759		6	54.5455	3.13	0.06204	2164		0.3211	2379		7
GO:0046629	gamma-delta T cell activation	15		8	53.3333	4.21	0.03426	1843		0.06973	817		5	33.3333	2.85	0.14008	2632		0.16599	1232		1	6.66667	0.49	0.39395	2797		0.39395	1336		1	6.66667	0.26	0.22722	1664		1	1760		7	46.6667	4.27	0.10391	2436		0.32112	2382		8
GO:0051923	sulfation	9		6	66.6667	2.53	0.01808	1576		0.06975	818		2	22.2222	1.71	0.53412	4633		0.57026	3166		0	0	0.3	1	6976		1	3706		0	0	0.15	1	6624		1	1761		5	55.5556	2.56	0.08105	2313		0.32116	2384		6
GO:1904293	negative regulation of ERAD pathway	13		7	53.8462	3.65	0.04456	2004		0.06975	819		5	38.4615	2.47	0.08313	2204		0.16595	1227		1	7.69231	0.43	0.35208	2591		0.35208	1236		NA	NA	NA	NA	NA		NA	7786		7	53.8462	3.7	0.04785	1983		0.07247	816		7
GO:0071801	regulation of podosome assembly	13		7	53.8462	3.65	0.04456	2005		0.06975	820		7	53.8462	2.47	0.00523	1087		0.16572	1214		0	0	0.43	1	7432		1	2583		0	0	0.22	1	7199		1	1762		7	53.8462	3.7	0.04785	1984		0.07247	817		9
GO:0010935	regulation of macrophage cytokine production	10		6	60	2.81	0.03457	1866		0.06976	821		5	50	1.9	0.02677	1586		0.0236	429		1	10	0.33	0.2838	2260		0.2838	1037		0	0	0.17	1	4759		1	1763		6	60	2.85	0.03694	1853		0.07248	818		6
GO:0002335	mature B cell differentiation	21		9	42.8571	5.9	0.10546	2552		0.06977	822		5	23.8095	4	0.36971	3934		0.57014	3150		1	4.7619	0.69	0.50405	3194		1	3692		0	0	0.36	1	3964		1	1764		7	33.3333	5.98	0.38799	4022		0.73809	4356		9
GO:0002730	regulation of dendritic cell cytokine production	11		6	54.5455	3.09	0.05829	2171		0.06978	823		5	45.4545	2.09	0.04153	1800		0.0236	430		1	9.09091	0.36	0.30732	2396		1	2257		1	9.09091	0.19	0.17221	1372		0.17221	564		6	54.5455	3.13	0.06204	2158		0.07249	820		6
GO:0045625	regulation of T-helper 1 cell differentiation	9		5	55.5556	2.53	0.07685	2304		0.0698	824		5	55.5556	1.71	0.01584	1439		0.02359	428		2	22.2222	0.3	0.0332	811		0.12473	460		1	11.1111	0.15	0.14326	1211		0.14326	466		5	55.5556	2.56	0.08105	2297		0.07252	821		5
GO:1903897	regulation of PERK-mediated unfolded protein response	9		5	55.5556	2.53	0.07685	2305		0.0698	825		2	22.2222	1.71	0.53412	4636		0.57026	3169		1	11.1111	0.3	0.25948	2114		0.25948	984		NA	NA	NA	NA	NA		NA	7787		5	55.5556	2.56	0.08105	2298		0.07252	822		4
GO:0042762	regulation of sulfur metabolic process	13		6	46.1538	3.65	0.12818	2673		0.06981	826		5	38.4615	2.47	0.08313	2197		0.02361	432		1	7.69231	0.43	0.35208	2590		0.35208	1235		0	0	0.22	1	5895		1	1765		4	30.7692	3.7	0.53073	4795		0.07263	834		5
GO:2001198	regulation of dendritic cell differentiation	10		5	50	2.81	0.11912	2614		0.06982	827		5	50	1.9	0.02677	1607		0.5698	3116		NA	NA	NA	NA	NA		NA	NA		1	10	0.17	0.15786	1285		0.15786	513		6	60	2.85	0.03694	1852		0.07248	819		5
GO:0019083	viral transcription	46		15	32.6087	12.91	0.29517	3600		0.06982	828		10	21.7391	8.75	0.37614	3964		0.1661	1242		0	0	1.51	1	5638		1	2604		2	4.34783	0.78	0.18438	1433		0.06631	194		15	32.6087	13.1	0.31642	3702		0.07254	825		15
GO:0042403	thyroid hormone metabolic process	14		6	42.8571	3.93	0.1733	3048		0.06982	829		3	21.4286	2.66	0.51509	4530		0.57025	3164		0	0	0.46	1	6356		1	3704		0	0	0.24	1	5844		1	1766		5	35.7143	3.99	0.36593	3893		0.07259	830		6
GO:0002507	tolerance induction	25		9	36	7.02	0.24896	3459		0.06983	830		8	32	4.76	0.0864	2224		0.16587	1218		5	20	0.82	0.00115	298		0.15255	514		1	4	0.43	0.34934	2141		0.34934	917		9	36	7.12	0.26351	3492		0.07255	827		9
GO:0001696	gastric acid secretion	14		5	35.7143	3.93	0.35323	3880		0.06987	831		4	28.5714	2.66	0.26891	3402		0.57009	3138		1	7.14286	0.46	0.37336	2694		0.37336	1297		0	0	0.24	1	3848		1	1767		5	35.7143	3.99	0.36593	3894		0.07259	831		5
GO:0072112	glomerular visceral epithelial cell differentiation	11		4	36.3636	3.09	0.37402	3969		0.06988	832		1	9.09091	2.09	0.90205	6770		0.90205	4819		0	0	0.36	1	7462		1	4752		0	0	0.19	1	7243		1	1768		4	36.3636	3.13	0.38552	3965		0.0726	833		2
GO:0051450	myoblast proliferation	13		4	30.7692	3.65	0.5179	4772		0.06991	833		1	7.69231	2.47	0.93582	6997		0.93582	4960		0	0	0.43	1	6931		1	4842		0	0	0.22	1	6562		1	1769		3	23.0769	3.7	0.76226	5965		0.32158	2429		3
GO:0033522	histone H2A ubiquitination	24		7	29.1667	6.74	0.52948	4815		0.06992	834		6	25	4.57	0.29961	3560		0.02364	433		2	8.33333	0.79	0.18536	1694		0.18536	742		0	0	0.41	1	5476		1	1770		9	37.5	6.83	0.22105	3172		0.07253	823		6
GO:0050912	detection of chemical stimulus involved in sensory perception of taste	15		4	26.6667	4.21	0.64407	5412		0.06994	835		1	6.66667	2.85	0.95794	7152		1	7635		1	6.66667	0.49	0.39395	2808		1	7200		1	6.66667	0.26	0.22722	1658		1	1771		4	26.6667	4.27	0.65667	5528		0.07266	835		4
GO:0007155	cell adhesion	1026		363	35.3801	288.03	6.3e-08	241		0.07209	836		237	23.0994	195.27	0.00041	674		0.06472	720		45	4.38596	33.67	0.02756	770		0.32259	1153		28	2.72904	17.47	0.00871	346		0.32409	878		362	35.2827	292.08	4.5e-07	277		0.03468	562		355
GO:0051239	regulation of multicellular organismal process	2262		760	33.5986	635.01	1.3e-10	140		0.07242	837		504	22.2812	430.52	1.1e-05	396		1	7559		104	4.5977	74.23	0.00013	194		1	7132		63	2.78515	38.52	2.7e-05	73		1	1772		750	33.1565	643.93	4.3e-08	204		0.07553	852		741
GO:0015031	protein transport	1791		587	32.775	502.78	1.4e-06	335		0.07321	838		416	23.2272	340.87	1.1e-06	311		0.46212	2647		74	4.13177	58.78	0.01993	672		0.69008	1846		25	1.39587	30.5	0.88317	3490		0.99371	1373		595	33.2217	509.85	1.2e-06	305		0.05684	685		575
GO:0012501	programmed cell death	1625		569	35.0154	456.18	3.7e-11	127		0.07335	839		402	24.7385	309.28	6.8e-10	153		0.33117	2145		70	4.30769	53.33	0.00976	505		1	3080		39	2.4	27.67	0.01621	446		1	1773		567	34.8923	462.6	9.4e-10	141		0.07592	853		556
GO:0001934	positive regulation of protein phosphorylation	765		265	34.6405	214.76	2.5e-05	472		0.07347	840		185	24.183	145.6	0.00016	574		0.12929	1032		43	5.62092	25.11	0.00038	236		0.92405	2082		19	2.48366	13.03	0.0632	729		1	1774		253	33.0719	217.78	0.0023	930		0.08595	981		253
GO:0050867	positive regulation of cell activation	281		118	41.9929	78.88	2.9e-07	284		0.07385	841		90	32.0285	53.48	1e-07	235		0.22938	1579		21	7.47331	9.22	0.00039	241		0.25343	936		9	3.20285	4.78	0.0514	668		1	1775		122	43.4164	79.99	4.6e-08	205		0.07771	861		116
GO:0040013	negative regulation of locomotion	253		81	32.0158	71.02	0.09146	2430		0.07399	842		61	24.1107	48.15	0.02529	1573		0.08545	803		15	5.92885	8.3	0.01993	671		0.10348	421		10	3.95257	4.31	0.01148	386		0.24825	741		84	33.2016	72.02	0.0547	2040		0.07929	865		79
GO:2000178	negative regulation of neural precursor cell proliferation	17		8	47.0588	4.77	0.07473	2294		0.07473	843		5	29.4118	3.24	0.20959	2982		0.20959	1536		NA	NA	NA	NA	NA		NA	NA		NA	NA	NA	NA	NA		NA	7788		8	47.0588	4.84	0.08029	2282		0.08029	875		8
GO:0001659	temperature homeostasis	135		64	47.4074	37.9	1.3e-06	329		0.07493	844		37	27.4074	25.69	0.01084	1285		0.23451	1588		4	2.96296	4.43	0.65122	3680		1	2799		5	3.7037	2.3	0.08085	792		1	1776		66	48.8889	38.43	3.7e-07	271		0.07894	862		62
GO:0002831	regulation of response to biotic stimulus	370		185	50	103.87	1.3e-19	65		0.07527	845		155	41.8919	70.42	7.1e-25	45		0.33356	2147		54	14.5946	12.14	9.3e-21	14		1	3081		20	5.40541	6.3	5.2e-06	60		1	1777		186	50.2703	105.33	2.5e-19	51		0.07747	857		182
GO:0033157	regulation of intracellular protein transport	237		87	36.7089	66.53	0.0022	943		0.07537	846		60	25.3165	45.11	0.00976	1267		0.53051	2970		7	2.95359	7.78	0.66467	3714		1	3575		0	0	4.04	1	5453		1	1778		80	33.7553	67.47	0.04185	1906		0.08019	873		86
GO:0051173	positive regulation of nitrogen compound metabolic process	2494		759	30.433	700.13	0.00199	929		0.07573	847		517	20.7298	474.67	0.00916	1258		0.03474	518		100	4.00962	81.85	0.01511	604		1	2289		53	2.1251	42.47	0.04468	632		1	1779		739	29.6311	709.98	0.07975	2279		0.07952	867		737
GO:1903828	negative regulation of cellular protein localization	96		43	44.7917	26.95	0.00033	670		0.07574	848		26	27.0833	18.27	0.03357	1720		0.23523	1593		6	6.25	3.15	0.09563	1202		1	2800		1	1.04167	1.63	0.80889	3353		1	1780		42	43.75	27.33	0.00095	806		0.2338	1775		40
GO:0042058	regulation of epidermal growth factor receptor signaling pathway	73		36	49.3151	20.49	9.4e-05	573		0.07579	849		22	30.137	13.89	0.01482	1400		0.07279	744		5	6.84932	2.4	0.09138	1172		0.03307	223		1	1.36986	1.24	0.71557	3173		0.71557	1250		35	47.9452	20.78	0.00032	668		0.08006	871		35
GO:1903428	positive regulation of reactive oxygen species biosynthetic process	43		23	53.4884	12.07	0.00038	699		0.07616	850		19	44.186	8.18	0.00014	562		0.01563	375		NA	NA	NA	NA	NA		NA	NA		2	4.65116	0.73	0.16608	1347		1	1781		24	55.814	12.24	0.00015	614		0.08027	874		24
GO:0045670	regulation of osteoclast differentiation	55		23	41.8182	15.44	0.0195	1603		0.07643	851		14	25.4545	10.47	0.14851	2707		0.23607	1597		3	5.45455	1.8	0.26967	2184		1	2804		2	3.63636	0.94	0.24063	1741		1	1782		23	41.8182	15.66	0.02295	1607		0.08064	885		23
GO:0050727	regulation of inflammatory response	272		136	50	76.36	9.5e-15	87		0.07645	852		96	35.2941	51.77	1.3e-10	137		0.00666	254		23	8.45588	8.93	3.2e-05	148		0.03493	234		13	4.77941	4.63	0.00079	159		0.50923	1097		134	49.2647	77.43	2e-13	96		0.08542	977		132
GO:0006691	leukotriene metabolic process	19		12	63.1579	5.33	0.00149	881		0.07651	853		7	36.8421	3.62	0.05353	1955		0.53337	2980		1	5.26316	0.62	0.46977	3064		0.46977	1491		1	5.26316	0.32	0.27859	1897		1	1783		12	63.1579	5.41	0.00171	882		0.0807	889		11
GO:0060338	regulation of type I interferon-mediated signaling pathway	25		13	52	7.02	0.00972	1352		0.07656	854		12	48	4.76	0.00096	772		0.07287	745		5	20	0.82	0.00115	299		0.25762	942		3	12	0.43	0.0085	343		0.23862	714		12	48	7.12	0.02986	1767		0.23546	1795		12
GO:0042770	signal transduction in response to DNA damage	121		39	32.2314	33.97	0.17786	3099		0.07664	855		22	18.1818	23.03	0.63109	4993		0.07364	779		4	3.30579	3.97	0.5649	3386		1	2390		1	0.826446	2.06	0.87605	3478		1	1784		44	36.3636	34.45	0.03561	1830		0.08045	878		39
GO:0042127	regulation of cell proliferation	1223		391	31.9706	343.33	0.0009	806		0.07667	856		274	22.4039	232.77	0.00108	788		0.44152	2599		48	3.92478	40.14	0.10891	1267		0.32292	1154		40	3.27065	20.83	4e-05	79		0.40077	981		397	32.4612	348.16	0.00072	759		0.01184	343		372
GO:0006821	chloride transport	60		21	35	16.84	0.14649	2862		0.07671	857		14	23.3333	11.42	0.24084	3155		0.0733	753		4	6.66667	1.97	0.1338	1352		1	2378		3	5	1.02	0.08231	858		0.02614	113		22	36.6667	17.08	0.10432	2443		0.23546	1796		22
GO:1903206	negative regulation of hydrogen peroxide-induced cell death	14		8	57.1429	3.93	0.0211	1638		0.07672	858		8	57.1429	2.66	0.0017	870		0.00233	167		2	14.2857	0.46	0.07538	1073		0.07538	349		NA	NA	NA	NA	NA		NA	7789		8	57.1429	3.99	0.02296	1618		0.08092	904		8
GO:0034105	positive regulation of tissue remodeling	22		10	45.4545	6.18	0.06158	2198		0.07674	859		8	36.3636	4.19	0.04323	1822		0.01582	378		1	4.54545	0.72	0.52035	3237		0.52035	1573		1	4.54545	0.37	0.31487	2016		0.31487	863		9	40.9091	6.26	0.14543	2834		0.08103	941		10
GO:0009404	toxin metabolic process	14		7	50	3.93	0.06802	2251		0.0768	860		7	50	2.66	0.00876	1234		0.07314	750		2	14.2857	0.46	0.07538	1076		0.07538	352		0	0	0.24	1	4594		1	1785		8	57.1429	3.99	0.02296	1617		0.08092	905		7
GO:0006071	glycerol metabolic process	14		7	50	3.93	0.06802	2252		0.0768	861		6	42.8571	2.66	0.03508	1746		0.07323	752		3	21.4286	0.46	0.00975	503		0.2585	945		0	0	0.24	1	4164		1	1786		7	50	3.99	0.07274	2238		0.081	929		7
GO:0002064	epithelial cell development	153		46	30.0654	42.95	0.31873	3774		0.0768	862		26	16.9935	29.12	0.77054	5881		0.65543	3725		6	3.92157	5.02	0.38776	2763		1	4058		0	0	2.61	1	3920		1	1787		51	33.3333	43.56	0.1065	2451		0.08063	883		44
GO:0006559	L-phenylalanine catabolic process	9		5	55.5556	2.53	0.07685	2306		0.07685	863		4	44.4444	1.71	0.07333	2112		0.07333	755		0	0	0.3	1	5124		1	2380		1	11.1111	0.15	0.14326	1212		0.14326	467		4	44.4444	2.56	0.23605	3352		0.23605	1808		5
GO:0051549	positive regulation of keratinocyte migration	9		5	55.5556	2.53	0.07685	2307		0.07685	864		2	22.2222	1.71	0.53412	4602		0.53412	2991		1	11.1111	0.3	0.25948	2106		0.25948	978		1	11.1111	0.15	0.14326	1193		0.14326	468		5	55.5556	2.56	0.08105	2299		0.08105	948		5
GO:0016188	synaptic vesicle maturation	9		5	55.5556	2.53	0.07685	2308		0.07685	865		4	44.4444	1.71	0.07333	2117		0.07333	760		0	0	0.3	1	5579		1	2384		1	11.1111	0.15	0.14326	1201		0.14326	469		6	66.6667	2.56	0.01941	1500		0.01941	402		5
GO:0008611	ether lipid biosynthetic process	9		5	55.5556	2.53	0.07685	2309		0.07685	866		4	44.4444	1.71	0.07333	2118		0.07333	761		1	11.1111	0.3	0.25948	2113		0.25948	957		0	0	0.15	1	4506		1	1788		6	66.6667	2.56	0.01941	1501		0.01941	403		4
GO:0071468	cellular response to acidic pH	9		5	55.5556	2.53	0.07685	2310		0.07685	867		1	11.1111	1.71	0.85054	6409		0.85054	4586		0	0	0.3	1	7394		1	4606		0	0	0.15	1	7161		1	1789		4	44.4444	2.56	0.23605	3359		0.23605	1809		5
GO:0048102	autophagic cell death	9		5	55.5556	2.53	0.07685	2311		0.07685	868		4	44.4444	1.71	0.07333	2120		0.07333	763		1	11.1111	0.3	0.25948	2103		0.25948	959		0	0	0.15	1	6346		1	1790		5	55.5556	2.56	0.08105	2300		0.08105	949		4
GO:0060340	positive regulation of type I interferon-mediated signaling pathway	9		5	55.5556	2.53	0.07685	2312		0.07685	869		6	66.6667	1.71	0.00234	923		0.00234	169		3	33.3333	0.3	0.00254	360		0.00254	64		2	22.2222	0.15	0.0096	362		0.0096	79		5	55.5556	2.56	0.08105	2301		0.08105	950		5
GO:1990535	neuron projection maintenance	9		5	55.5556	2.53	0.07685	2313		0.07685	870		3	33.3333	1.71	0.23652	3097		0.23652	1612		NA	NA	NA	NA	NA		NA	NA		NA	NA	NA	NA	NA		NA	7790		5	55.5556	2.56	0.08105	2302		0.08105	951		4
GO:0071550	death-inducing signaling complex assembly	9		5	55.5556	2.53	0.07685	2314		0.07685	871		5	55.5556	1.71	0.01584	1431		0.01584	380		0	0	0.3	1	7405		1	2241		0	0	0.15	1	7174		1	1791		5	55.5556	2.56	0.08105	2303		0.08105	952		5
GO:0034058	endosomal vesicle fusion	9		5	55.5556	2.53	0.07685	2315		0.07685	872		3	33.3333	1.71	0.23652	3104		0.23652	1619		1	11.1111	0.3	0.25948	2119		0.25948	972		1	11.1111	0.15	0.14326	1216		0.14326	470		5	55.5556	2.56	0.08105	2304		0.08105	953		5
GO:0005984	disaccharide metabolic process	9		5	55.5556	2.53	0.07685	2316		0.07685	873		2	22.2222	1.71	0.53412	4620		0.53412	3009		0	0	0.3	1	5007		1	3597		0	0	0.15	1	4143		1	1792		3	33.3333	2.56	0.49576	4680		0.49576	3273		5
GO:0045741	positive regulation of epidermal growth factor-activated receptor activity	9		5	55.5556	2.53	0.07685	2317		0.07685	874		3	33.3333	1.71	0.23652	3107		0.23652	1622		1	11.1111	0.3	0.25948	2115		0.25948	974		0	0	0.15	1	6155		1	1793		5	55.5556	2.56	0.08105	2305		0.08105	954		5
GO:0032725	positive regulation of granulocyte macrophage colony-stimulating factor production	9		5	55.5556	2.53	0.07685	2318		0.07685	875		3	33.3333	1.71	0.23652	3108		0.23652	1623		1	11.1111	0.3	0.25948	2101		0.25948	975		1	11.1111	0.15	0.14326	1194		0.14326	471		5	55.5556	2.56	0.08105	2306		0.08105	955		5
GO:1903265	positive regulation of tumor necrosis factor-mediated signaling pathway	9		5	55.5556	2.53	0.07685	2319		0.07685	876		4	44.4444	1.71	0.07333	2129		0.07333	772		1	11.1111	0.3	0.25948	2110		0.25948	963		NA	NA	NA	NA	NA		NA	7791		3	33.3333	2.56	0.49576	4685		0.49576	3274		5
GO:0043497	regulation of protein heterodimerization activity	9		5	55.5556	2.53	0.07685	2320		0.07685	877		4	44.4444	1.71	0.07333	2131		0.07333	774		1	11.1111	0.3	0.25948	2090		0.25948	965		1	11.1111	0.15	0.14326	1192		0.14326	472		5	55.5556	2.56	0.08105	2308		0.08105	956		5
GO:0006171	cAMP biosynthetic process	9		5	55.5556	2.53	0.07685	2321		0.07685	878		2	22.2222	1.71	0.53412	4627		0.53412	3016		1	11.1111	0.3	0.25948	2105		0.25948	983		0	0	0.15	1	4194		1	1794		5	55.5556	2.56	0.08105	2309		0.08105	957		5
GO:0006000	fructose metabolic process	14		6	42.8571	3.93	0.1733	3049		0.07688	879		5	35.7143	2.66	0.10982	2415		0.07333	754		0	0	0.46	1	5008		1	2379		0	0	0.24	1	4144		1	1795		5	35.7143	3.99	0.36593	3896		0.23612	1834		6
GO:0071900	regulation of protein serine/threonine kinase activity	427		164	38.4075	119.87	1.7e-06	342		0.07689	880		100	23.4192	81.27	0.01255	1326		0.64886	3416		26	6.08899	14.01	0.00185	330		0.06285	298		5	1.17096	7.27	0.85699	3449		1	1796		160	37.4707	121.56	2.7e-05	480		0.07935	866		160
GO:0071407	cellular response to organic cyclic compound	464		152	32.7586	130.26	0.01358	1459		0.07689	881		103	22.1983	88.31	0.04564	1843		0.0183	395		14	3.01724	15.23	0.6654	3715		0.4424	1428		9	1.93966	7.9	0.39319	2339		0.4937	1083		155	33.4052	132.09	0.01018	1307		0.01957	406		147
GO:0019722	calcium-mediated signaling	171		54	31.5789	48	0.17284	3046		0.07695	882		46	26.9006	32.55	0.00713	1158		0.11427	1018		11	6.43275	5.61	0.02548	740		0.01883	154		6	3.50877	2.91	0.07227	767		0.3792	956		55	32.1637	48.68	0.16027	2880		0.08765	985		54
GO:0051130	positive regulation of cellular component organization	1009		342	33.8949	283.25	1.4e-05	438		0.07696	883		219	21.7047	192.04	0.01449	1388		0.87684	4662		39	3.86521	33.11	0.16043	1519		1	4654		15	1.48662	17.18	0.74557	3227		1	1797		331	32.8048	287.24	0.00094	804		0.08732	984		333
GO:0048002	antigen processing and presentation of peptide antigen	128		66	51.5625	35.93	1.5e-08	214		0.07754	884		46	35.9375	24.36	4.8e-06	357		0.03562	530		10	7.8125	4.2	0.00947	496		0.06382	303		3	2.34375	2.18	0.37243	2263		0.03379	136		66	51.5625	36.44	2.8e-08	193		0.07978	869		63
GO:0016052	carbohydrate catabolic process	126		60	47.619	35.37	2.2e-06	359		0.07778	885		41	32.5397	23.98	0.0002	591		0.03575	534		7	5.55556	4.13	0.1207	1318		1	2292		0	0	2.15	1	4877		1	1798		61	48.4127	35.87	1.5e-06	316		0.07997	870		61
GO:0090114	COPII-coated vesicle budding	67		36	53.7313	18.81	8.3e-06	413		0.07811	886		22	32.8358	12.75	0.005	1064		0.34335	2176		7	10.4478	2.2	0.00623	440		1	3100		2	2.98507	1.14	0.31646	2038		1	1799		36	53.7313	19.07	1.2e-05	419		0.08034	877		34
GO:0002495	antigen processing and presentation of peptide antigen via MHC class II	92		40	43.4783	25.83	0.00107	833		0.07824	887		23	25	17.51	0.0946	2319		0.34382	2202		3	3.26087	3.02	0.58568	3470		1	3122		1	1.08696	1.57	0.79519	3327		1	1800		39	42.3913	26.19	0.00285	978		0.08052	880		37
GO:1903556	negative regulation of tumor necrosis factor superfamily cytokine production	44		26	59.0909	12.35	1.6e-05	444		0.07826	888		21	47.7273	8.37	1.5e-05	405		0.34293	2163		4	9.09091	1.44	0.05541	968		0.06432	307		2	4.54545	0.75	0.17214	1357		1	1801		27	61.3636	12.53	5.4e-06	376		0.08045	879		25
GO:0032608	interferon-beta production	51		27	52.9412	14.32	0.00015	616		0.0783	889		20	39.2157	9.71	0.00064	719		0.34322	2173		10	19.6078	1.67	5e-06	124		1	3098		2	3.92157	0.87	0.21545	1614		1	1802		26	50.9804	14.52	0.00056	731		0.4871	3041		26
GO:0002704	negative regulation of leukocyte mediated immunity	40		23	57.5	11.23	8.9e-05	569		0.07834	890		17	42.5	7.61	0.00054	691		0.03598	535		2	5	1.31	0.37965	2747		1	2293		3	7.5	0.68	0.03032	539		0.03356	131		22	55	11.39	0.00038	679		0.08062	882		23
GO:0048017	inositol lipid-mediated signaling	133		47	35.3383	37.34	0.03992	1923		0.07843	891		26	19.5489	25.31	0.4745	4427		1	5505		2	1.50376	4.36	0.93578	4488		1	5257		1	0.75188	2.26	0.89935	3521		1	1803		47	35.3383	37.86	0.04972	2016		0.08068	887		48
GO:0038095	Fc-epsilon receptor signaling pathway	59		22	37.2881	16.56	0.07844	2339		0.07844	892		14	23.7288	11.23	0.22076	3018		0.22076	1545		2	3.38983	1.94	0.58141	3464		0.58141	1701		1	1.69492	1	0.63781	3015		0.63781	1200		21	35.5932	16.8	0.14251	2716		0.14251	1232		22
GO:0032613	interleukin-10 production	45		22	48.8889	12.63	0.0024	959		0.07845	893		13	28.8889	8.56	0.07215	2109		0.34396	2210		4	8.88889	1.48	0.05931	998		0.06432	308		1	2.22222	0.77	0.53892	2765		1	1804		22	48.8889	12.81	0.00291	985		0.08068	888		22
GO:0072665	protein localization to vacuole	49		23	46.9388	13.76	0.00374	1063		0.07845	894		17	34.6939	9.33	0.00699	1146		0.03603	537		4	8.16327	1.61	0.07631	1094		0.00107	47		2	4.08163	0.83	0.20296	1544		1	1805		22	44.898	13.95	0.01027	1310		0.08073	891		24
GO:0002753	cytoplasmic pattern recognition receptor signaling pathway	58		25	43.1034	16.28	0.0099	1359		0.07847	895		20	34.4828	11.04	0.0039	1023		0.03599	536		8	13.7931	1.9	0.00057	265		0.06378	302		2	3.44828	0.99	0.25961	1809		1	1806		23	39.6552	16.51	0.0434	1914		0.0808	895		24
GO:0006140	regulation of nucleotide metabolic process	80		31	38.75	22.46	0.02483	1742		0.07848	896		28	35	15.23	0.00054	692		0.3429	2162		2	2.5	2.63	0.74357	3967		0.0956	416		0	0	1.36	1	4188		1	1807		33	41.25	22.77	0.00938	1296		0.08063	884		30
GO:0001914	regulation of T cell mediated cytotoxicity	31		17	54.8387	8.7	0.00153	887		0.07849	897		15	48.3871	5.9	0.0002	593		0.34337	2179		1	3.22581	1.02	0.645	3668		1	3103		2	6.45161	0.53	0.0973	910		0.11301	358		17	54.8387	8.82	0.00181	890		0.08073	892		17
GO:1905898	positive regulation of response to endoplasmic reticulum stress	33		17	51.5152	9.26	0.00369	1057		0.07852	898		12	36.3636	6.28	0.01471	1398		0.3438	2199		4	12.1212	1.08	0.02206	710		1	3119		1	3.0303	0.56	0.43304	2463		1	1808		19	57.5758	9.39	0.00043	697		0.08066	886		16
GO:0051883	killing of cells in other organism involved in symbiotic interaction	12		11	91.6667	3.37	7.5e-06	409		0.07852	899		5	41.6667	2.28	0.06031	2010		0.03618	550		1	8.33333	0.39	0.33007	2513		1	2302		0	0	0.2	1	6616		1	1809		11	91.6667	3.42	8.7e-06	408		0.08075	893		11
GO:0070232	regulation of T cell apoptotic process	30		16	53.3333	8.42	0.00306	1034		0.07853	900		12	40	5.71	0.00627	1132		0.34373	2192		2	6.66667	0.98	0.25839	2076		1	3114		2	6.66667	0.51	0.09202	894		1	1810		13	43.3333	8.54	0.05821	2074		0.08089	901		15
GO:0090208	positive regulation of triglyceride metabolic process	13		11	84.6154	3.65	3.6e-05	499		0.07854	901		7	53.8462	2.47	0.00523	1089		1	5378		0	0	0.43	1	7586		1	5142		1	7.69231	0.22	0.20018	1531		1	1811		10	76.9231	3.7	0.00041	690		0.08081	896		9
GO:0010659	cardiac muscle cell apoptotic process	29		15	51.7241	8.14	0.00597	1169		0.07856	902		11	37.931	5.52	0.01367	1344		0.34383	2203		1	3.44828	0.95	0.62044	3584		1	3123		0	0	0.49	1	4684		1	1812		13	44.8276	8.26	0.04417	1928		0.48785	3083		15
GO:0002691	regulation of cellular extravasation	20		12	60	5.61	0.00278	1013		0.07858	903		9	45	3.81	0.00711	1154		0.03611	541		1	5	0.66	0.48719	3140		1	2297		1	5	0.34	0.29089	1927		0.29089	830		11	55	5.69	0.01133	1334		0.08085	899		12
GO:1902563	regulation of neutrophil activation	10		9	90	2.81	8e-05	561		0.07859	904		5	50	1.9	0.02677	1605		0.34413	2229		NA	NA	NA	NA	NA		NA	NA		NA	NA	NA	NA	NA		NA	7792		9	90	2.85	9.1e-05	565		0.08082	897		9
GO:0046466	membrane lipid catabolic process	25		13	52	7.02	0.00972	1353		0.07859	905		10	40	4.76	0.01224	1321		0.34386	2205		3	12	0.82	0.04729	911		1	3125		1	4	0.43	0.34934	2143		0.34934	918		13	52	7.12	0.01101	1325		0.08083	898		14
GO:1900024	regulation of substrate adhesion-dependent cell spreading	43		17	39.5349	12.07	0.06931	2274		0.07864	906		7	16.2791	8.18	0.73596	5768		1	6092		2	4.65116	1.41	0.41458	2896		1	5806		0	0	0.73	1	7645		1	1813		16	37.2093	12.24	0.13576	2676		0.08092	906		17
GO:0045136	development of secondary sexual characteristics	8		6	75	2.25	0.0079	1284		0.07869	907		6	75	1.52	0.00093	763		0.03613	545		0	0	0.26	1	6549		1	2300		0	0	0.14	1	6087		1	1814		5	62.5	2.28	0.0468	1958		0.08097	919		6
GO:1903147	negative regulation of autophagy of mitochondrion	8		6	75	2.25	0.0079	1285		0.07869	908		5	62.5	1.52	0.00834	1216		0.03616	549		NA	NA	NA	NA	NA		NA	NA		NA	NA	NA	NA	NA		NA	7793		6	75	2.28	0.00852	1252		0.08092	907		6
GO:0043500	muscle adaptation	87		28	32.1839	24.42	0.22835	3419		0.0787	909		17	19.5402	16.56	0.49514	4461		0.03625	564		1	1.14943	2.86	0.94568	4500		1	2309		1	1.14943	1.48	0.7767	3278		1	1815		27	31.0345	24.77	0.33473	3812		0.08099	922		27
GO:0010517	regulation of phospholipase activity	41		15	36.5854	11.51	0.14916	2868		0.0787	910		10	24.3902	7.8	0.24253	3162		1	6951		3	7.31707	1.35	0.15061	1413		1	6568		1	2.43902	0.7	0.50602	2682		1	1816		12	29.2683	11.67	0.51371	4745		1	5917		15
GO:0006662	glycerol ether metabolic process	17		8	47.0588	4.77	0.07473	2295		0.07871	911		9	52.9412	3.24	0.00178	885		0.03609	538		1	5.88235	0.56	0.43312	2949		1	2294		0	0	0.29	1	4336		1	1817		10	58.8235	4.84	0.00851	1236		0.08086	900		7
GO:1903793	positive regulation of anion transport	35		13	37.1429	9.83	0.15668	2890		0.07872	912		12	34.2857	6.66	0.0239	1554		0.0361	540		1	2.85714	1.15	0.68946	3796		1	2296		2	5.71429	0.6	0.11923	1077		1	1818		14	40	9.96	0.09494	2388		0.08091	902		13
GO:0046879	hormone secretion	224		66	29.4643	62.88	0.34407	3863		0.07872	913		41	18.3036	42.63	0.63726	5001		0.34473	2314		7	3.125	7.35	0.60602	3524		0.20885	839		3	1.33929	3.81	0.73843	3216		1	1819		66	29.4643	63.77	0.3942	4040		0.08099	923		61
GO:0032621	interleukin-18 production	7		5	71.4286	1.97	0.02151	1661		0.07872	914		3	42.8571	1.33	0.13174	2539		0.03621	555		2	28.5714	0.23	0.02022	687		0.06443	312		0	0	0.12	1	5379		1	1820		5	71.4286	1.99	0.02287	1601		0.08095	913		5
GO:0032959	inositol trisphosphate biosynthetic process	7		5	71.4286	1.97	0.02151	1662		0.07872	915		3	42.8571	1.33	0.13174	2583		0.34431	2257		0	0	0.23	1	6007		1	3160		1	14.2857	0.12	0.1133	1046		1	1821		3	42.8571	1.99	0.31843	3760		0.48826	3144		5
GO:0006863	purine nucleobase transport	7		5	71.4286	1.97	0.02151	1663		0.07872	916		4	57.1429	1.33	0.02806	1646		0.34418	2234		0	0	0.23	1	5183		1	3143		0	0	0.12	1	4375		1	1822		5	71.4286	1.99	0.02287	1602		0.08095	914		4
GO:0072574	hepatocyte proliferation	12		6	50	3.37	0.08958	2401		0.07874	917		6	50	2.28	0.01523	1412		0.03615	546		1	8.33333	0.39	0.33007	2510		1	2301		0	0	0.2	1	7301		1	1823		7	58.3333	3.42	0.02912	1744		0.08093	909		7
GO:1903203	regulation of oxidative stress-induced neuron death	23		9	39.1304	6.46	0.17018	3029		0.07874	918		9	39.1304	4.38	0.02007	1493		0.03612	544		NA	NA	NA	NA	NA		NA	NA		NA	NA	NA	NA	NA		NA	7794		10	43.4783	6.55	0.08934	2351		0.08093	910		9
GO:1902884	positive regulation of response to oxidative stress	16		7	43.75	4.49	0.13298	2713		0.07875	919		8	50	3.05	0.00508	1076		0.34389	2207		NA	NA	NA	NA	NA		NA	NA		NA	NA	NA	NA	NA		NA	7795		7	43.75	4.55	0.14109	2692		0.08098	921		7
GO:0046386	deoxyribose phosphate catabolic process	20		8	40	5.61	0.17248	3040		0.07875	920		8	40	3.81	0.02427	1563		0.34399	2212		1	5	0.66	0.48719	3138		1	3129		0	0	0.34	1	6260		1	1824		9	45	5.69	0.08562	2333		0.08094	911		8
GO:0070839	divalent metal ion export	10		5	50	2.81	0.11912	2615		0.07876	921		3	30	1.9	0.29315	3481		0.03623	561		0	0	0.33	1	7322		1	2308		0	0	0.17	1	7055		1	1825		5	50	2.85	0.12516	2602		0.08099	924		4
GO:0070813	hydrogen sulfide metabolic process	7		4	57.1429	1.97	0.10237	2470		0.07877	922		5	71.4286	1.33	0.00371	1014		0.03615	547		1	14.2857	0.23	0.20835	1765		0.20835	784		0	0	0.12	1	7050		1	1826		5	71.4286	1.99	0.02287	1599		0.08095	915		4
GO:0023035	CD40 signaling pathway	7		4	57.1429	1.97	0.10237	2471		0.07877	923		3	42.8571	1.33	0.13174	2538		0.03621	554		1	14.2857	0.23	0.20835	1822		1	2303		0	0	0.12	1	5086		1	1827		5	71.4286	1.99	0.02287	1600		0.08095	916		4
GO:1902947	regulation of tau-protein kinase activity	7		4	57.1429	1.97	0.10237	2472		0.07877	924		2	28.5714	1.33	0.39652	4059		1	6562		NA	NA	NA	NA	NA		NA	NA		1	14.2857	0.12	0.1133	1042		1	1828		4	57.1429	1.99	0.10698	2454		0.081	930		3
GO:2000659	regulation of interleukin-1-mediated signaling pathway	7		4	57.1429	1.97	0.10237	2473		0.07877	925		3	42.8571	1.33	0.13174	2580		0.34431	2254		1	14.2857	0.23	0.20835	1811		0.20835	791		1	14.2857	0.12	0.1133	1049		1	1829		3	42.8571	1.99	0.31843	3756		0.48826	3145		4
GO:0015809	arginine transport	7		4	57.1429	1.97	0.10237	2474		0.07877	926		3	42.8571	1.33	0.13174	2581		0.34431	2255		0	0	0.23	1	5542		1	3159		0	0	0.12	1	4847		1	1830		4	57.1429	1.99	0.10698	2455		0.081	931		4
GO:0043455	regulation of secondary metabolic process	7		4	57.1429	1.97	0.10237	2475		0.07877	927		3	42.8571	1.33	0.13174	2540		0.03621	556		0	0	0.23	1	6438		1	2304		0	0	0.12	1	5957		1	1831		4	57.1429	1.99	0.10698	2456		0.081	932		4
GO:0099159	regulation of modification of postsynaptic structure	7		4	57.1429	1.97	0.10237	2476		0.07877	928		3	42.8571	1.33	0.13174	2582		0.34431	2256		1	14.2857	0.23	0.20835	1814		0.20835	792		0	0	0.12	1	7578		1	1832		4	57.1429	1.99	0.10698	2457		0.081	933		4
GO:1902992	negative regulation of amyloid precursor protein catabolic process	11		5	45.4545	3.09	0.16982	2994		0.07877	929		3	27.2727	2.09	0.35048	3849		0.03623	562		NA	NA	NA	NA	NA		NA	NA		1	9.09091	0.19	0.17221	1400		1	1833		6	54.5455	3.13	0.06204	2159		0.08096	917		5
GO:0060368	regulation of Fc receptor mediated stimulatory signaling pathway	9		4	44.4444	2.53	0.22751	3359		0.07879	930		4	44.4444	1.71	0.07333	2111		0.03619	552		2	22.2222	0.3	0.0332	810		0.09509	398		0	0	0.15	1	6765		1	1834		4	44.4444	2.56	0.23605	3348		0.08102	937		4
GO:0051133	regulation of NK T cell activation	9		4	44.4444	2.53	0.22751	3360		0.07879	931		3	33.3333	1.71	0.23652	3087		0.03622	560		0	0	0.3	1	6887		1	2307		1	11.1111	0.15	0.14326	1233		1	1835		4	44.4444	2.56	0.23605	3349		0.08102	938		4
GO:0033561	regulation of water loss via skin	13		5	38.4615	3.65	0.28897	3558		0.0788	932		2	15.3846	2.47	0.73946	5782		0.73946	4084		0	0	0.43	1	6072		1	4289		0	0	0.22	1	5480		1	1836		5	38.4615	3.7	0.30035	3599		0.08103	942		5
GO:0071875	adrenergic receptor signaling pathway	13		5	38.4615	3.65	0.28897	3559		0.0788	933		2	15.3846	2.47	0.73946	5771		0.34458	2301		1	7.69231	0.43	0.35208	2623		1	3195		0	0	0.22	1	7215		1	1837		4	30.7692	3.7	0.53073	4803		0.48834	3170		5
GO:1903209	positive regulation of oxidative stress-induced cell death	13		5	38.4615	3.65	0.28897	3560		0.0788	934		6	46.1538	2.47	0.0238	1545		0.03616	548		NA	NA	NA	NA	NA		NA	NA		NA	NA	NA	NA	NA		NA	7796		5	38.4615	3.7	0.30035	3600		0.08103	943		5
GO:0086009	membrane repolarization	31		10	32.2581	8.7	0.36514	3934		0.0788	935		8	25.8065	5.9	0.22513	3050		0.0362	553		2	6.45161	1.02	0.27069	2185		0.06455	320		0	0	0.53	1	7333		1	1838		11	35.4839	8.82	0.2474	3456		0.08099	925		10
GO:0098743	cell aggregation	10		4	40	2.81	0.29976	3608		0.0788	936		2	20	1.9	0.59436	4803		0.3445	2289		0	0	0.33	1	7699		1	3186		0	0	0.17	1	7533		1	1839		4	40	2.85	0.30997	3640		0.08104	945		4
GO:0051280	negative regulation of release of sequestered calcium ion into cytosol	10		4	40	2.81	0.29976	3609		0.0788	937		5	50	1.9	0.02677	1606		0.34413	2230		0	0	0.33	1	6901		1	3140		1	10	0.17	0.15786	1326		1	1840		4	40	2.85	0.30997	3641		0.08104	946		4
GO:0010533	regulation of activation of Janus kinase activity	7		3	42.8571	1.97	0.30966	3688		0.07881	938		2	28.5714	1.33	0.39652	4037		0.39652	2503		1	14.2857	0.23	0.20835	1776		0.20835	810		1	14.2857	0.12	0.1133	1004		0.1133	369		3	42.8571	1.99	0.31843	3706		0.08104	947		3
GO:0071542	dopaminergic neuron differentiation	15		5	33.3333	4.21	0.41795	4228		0.07882	939		NA	NA	NA	NA	NA		NA	8129		0	0	0.49	1	7403		1	7671		0	0	0.26	1	7172		1	1841		6	40	4.27	0.23456	3327		0.08101	936		4
GO:0002858	regulation of natural killer cell mediated cytotoxicity directed against tumor cell target	8		3	37.5	2.25	0.39912	4081		0.07882	940		2	25	1.52	0.46799	4335		0.46799	2731		1	12.5	0.26	0.23434	1964		0.23434	895		0	0	0.14	1	4038		1	1842		3	37.5	2.28	0.40919	4079		0.08106	961		3
GO:1902750	negative regulation of cell cycle G2/M phase transition	52		15	28.8462	14.6	0.50301	4740		0.07884	941		8	15.3846	9.9	0.79905	6103		0.03632	566		2	3.84615	1.71	0.51285	3229		1	2311		NA	NA	NA	NA	NA		NA	7797		16	30.7692	14.8	0.40698	4060		0.08103	944		14
GO:0046607	positive regulation of centrosome cycle	10		3	30	2.81	0.56429	5031		0.07885	942		2	20	1.9	0.59436	4821		0.59436	3249		0	0	0.33	1	6700		1	3760		0	0	0.17	1	6292		1	1843		3	30	2.85	0.57539	5087		0.08108	964		3
GO:1903670	regulation of sprouting angiogenesis	53		15	28.3019	14.88	0.53728	4837		0.07885	943		9	16.9811	10.09	0.70206	5502		0.34465	2308		1	1.88679	1.74	0.83003	4188		1	3201		NA	NA	NA	NA	NA		NA	7798		14	26.4151	15.09	0.67965	5600		0.08114	970		12
GO:1903020	positive regulation of glycoprotein metabolic process	18		5	27.7778	5.05	0.59959	5177		0.07886	944		4	22.2222	3.43	0.45691	4243		0.03624	563		2	11.1111	0.59	0.11645	1286		0.06449	317		NA	NA	NA	NA	NA		NA	7799		5	27.7778	5.12	0.61397	5287		0.08109	965		5
GO:0017004	cytochrome complex assembly	33		9	27.2727	9.26	0.60611	5202		0.07887	945		12	36.3636	6.28	0.01471	1396		0.03609	539		1	3.0303	1.08	0.66797	3737		1	2295		1	3.0303	0.56	0.43304	2462		1	1844		12	36.3636	9.39	0.20536	3129		0.08097	920		9
GO:0031498	chromatin disassembly	19		5	26.3158	5.33	0.65255	5439		0.07887	946		3	15.7895	3.62	0.7301	5736		0.34459	2303		0	0	0.62	1	5847		1	3197		1	5.26316	0.32	0.27859	1898		1	1845		3	15.7895	5.41	0.93882	7251		0.48864	3212		5
GO:1901984	negative regulation of protein acetylation	19		5	26.3158	5.33	0.65255	5440		0.07887	947		3	15.7895	3.62	0.7301	5737		0.34459	2304		NA	NA	NA	NA	NA		NA	NA		NA	NA	NA	NA	NA		NA	7800		5	26.3158	5.41	0.66655	5565		0.08111	967		4
GO:0031958	corticosteroid receptor signaling pathway	16		4	25	4.49	0.69829	5547		0.07888	948		NA	NA	NA	NA	NA		NA	7886		0	0	0.53	1	5870		1	7428		0	0	0.27	1	5273		1	1846		4	25	4.55	0.71033	5705		0.08111	968		4
GO:0006622	protein targeting to lysosome	20		9	45	5.61	0.07932	2343		0.07932	949		6	30	3.81	0.16516	2760		0.16516	1199		2	10	0.66	0.13867	1361		0.13867	491		1	5	0.34	0.29089	1929		0.29089	831		8	40	5.69	0.18313	3055		0.18313	1494		9
GO:0038111	interleukin-7-mediated signaling pathway	20		9	45	5.61	0.07932	2344		0.07932	950		7	35	3.81	0.06929	2079		0.06929	735		1	5	0.66	0.48719	3124		0.48719	1517		1	5	0.34	0.29089	1928		0.29089	832		9	45	5.69	0.08562	2334		0.08562	979		9
GO:0030220	platelet formation	20		9	45	5.61	0.07932	2345		0.07932	951		5	25	3.81	0.3284	3790		0.3284	2142		0	0	0.66	1	5761		1	3077		0	0	0.34	1	5112		1	1847		10	50	5.69	0.03392	1811		0.03392	559		9
GO:0071347	cellular response to interleukin-1	102		49	48.0392	28.63	1.4e-05	435		0.0794	952		36	35.2941	19.41	7.7e-05	512		0.01908	397		12	11.7647	3.35	0.00012	188		0.0011	48		5	4.90196	1.74	0.03014	537		0.05256	177		48	47.0588	29.04	4.9e-05	514		0.05054	659		46
GO:0030855	epithelial cell differentiation	425		121	28.4706	119.31	0.4451	4494		0.08178	953		81	19.0588	80.89	0.51462	4508		0.02976	510		15	3.52941	13.95	0.42372	2905		0.90576	2062		4	0.941176	7.24	0.93455	3590		0.98161	1363		126	29.6471	120.99	0.30896	3637		0.09145	990		120
GO:0071549	cellular response to dexamethasone stimulus	23		10	43.4783	6.46	0.08241	2361		0.08241	954		9	39.1304	4.38	0.02007	1491		0.02007	402		1	4.34783	0.75	0.53612	3299		0.53612	1608		1	4.34783	0.39	0.32656	2057		0.32656	884		11	47.8261	6.55	0.03805	1878		0.03805	596		9
GO:0032781	positive regulation of ATPase activity	56		20	35.7143	15.72	0.13093	2697		0.08246	955		15	26.7857	10.66	0.0983	2336		0.04384	584		4	7.14286	1.84	0.1112	1270		0.22463	852		1	1.78571	0.95	0.61858	2964		0.61858	1182		24	42.8571	15.94	0.01469	1408		0.00093	132		20
GO:0033574	response to testosterone	32		12	37.5	8.98	0.16037	2899		0.08248	956		9	28.125	6.09	0.13949	2614		0.05566	690		2	6.25	1.05	0.28297	2225		0.53552	1604		2	6.25	0.54	0.10267	981		0.10267	342		12	37.5	9.11	0.17319	2954		0.08942	987		13
GO:0046496	nicotinamide nucleotide metabolic process	122		56	45.9016	34.25	1.9e-05	453		0.08322	957		43	35.2459	23.22	1.7e-05	409		0.05289	679		7	5.7377	4	0.10657	1258		0.10564	424		1	0.819672	2.08	0.87818	3481		1	1848		57	46.7213	34.73	1.3e-05	425		0.04631	612		56
GO:0006754	ATP biosynthetic process	100		47	47	28.07	4.1e-05	511		0.08369	958		42	42	19.03	9.5e-08	231		0.02266	415		2	2	3.28	0.8449	4215		0.85163	2016		1	1	1.7	0.82167	3376		1	1849		50	50	28.47	4.1e-06	362		0.04639	613		45
GO:0044257	cellular protein catabolic process	678		245	36.1357	190.33	1.7e-06	340		0.08401	959		176	25.9587	129.04	3.3e-06	343		0.0139	333		26	3.83481	22.25	0.23123	1913		1	2226		13	1.9174	11.54	0.37019	2237		1	1850		260	38.3481	193.01	7.5e-09	171		0.02636	535		235
GO:2001244	positive regulation of intrinsic apoptotic signaling pathway	51		20	39.2157	14.32	0.05601	2104		0.08527	960		15	29.4118	9.71	0.04863	1874		0.06593	724		2	3.92157	1.67	0.50247	3170		0.50247	1537		3	5.88235	0.87	0.05586	686		0.05586	182		22	43.1373	14.52	0.0175	1462		0.00687	266		17
GO:0007566	embryo implantation	39		15	38.4615	10.95	0.10465	2546		0.08552	961		11	28.2051	7.42	0.10755	2400		0.08426	799		1	2.5641	1.28	0.72837	3906		0.72837	1896		0	0	0.66	1	4471		1	1851		15	38.4615	11.1	0.11532	2564		0.0935	995		15
GO:0045648	positive regulation of erythrocyte differentiation	29		12	41.3793	8.14	0.08555	2383		0.08555	962		9	31.0345	5.52	0.08427	2219		0.08427	801		1	3.44828	0.95	0.62044	3582		0.62044	1746		1	3.44828	0.49	0.39262	2321		0.39262	972		12	41.3793	8.26	0.09353	2377		0.09353	997		11
GO:0031670	cellular response to nutrient	58		22	37.931	16.28	0.06614	2228		0.08588	963		17	29.3103	11.04	0.03856	1779		0.0548	685		5	8.62069	1.9	0.04114	875		0.02678	202		2	3.44828	0.99	0.25961	1807		0.25961	771		25	43.1034	16.51	0.01191	1346		0.02196	415		22
GO:0042407	cristae formation	32		13	40.625	8.98	0.08608	2391		0.08608	964		13	40.625	6.09	0.00385	1022		0.00385	210		0	0	1.05	1	6357		1	2190		1	3.125	0.54	0.42319	2422		0.42319	1012		15	46.875	9.11	0.02043	1536		0.02043	410		11
GO:0002446	neutrophil mediated immunity	476		311	65.3361	133.63	< 1e-30	8		0.08689	965		225	47.2689	90.59	< 1e-30	20		0.36651	2385		25	5.2521	15.62	0.01407	568		1	3234		15	3.15126	8.11	0.01629	448		1	1852		315	66.1765	135.51	< 1e-30	10		0.28684	2135		303
GO:1902533	positive regulation of intracellular signal transduction	836		304	36.3636	234.69	4.4e-08	233		0.08753	966		224	26.7943	159.11	8.7e-09	187		0.28916	1895		53	6.33971	27.44	2.7e-06	118		0.0504	276		28	3.34928	14.24	0.00045	136		0.17107	554		295	35.2871	237.99	5.5e-06	378		0.16769	1426		297
GO:0030833	regulation of actin filament polymerization	134		52	38.806	37.62	0.00449	1104		0.08836	967		35	26.1194	25.5	0.02653	1584		0.69449	3771		1	0.746269	4.4	0.98883	4640		1	4077		1	0.746269	2.28	0.90108	3528		1	1853		51	38.0597	38.15	0.01003	1303		0.09385	999		52
GO:0051897	positive regulation of protein kinase B signaling	114		39	34.2105	32	0.08864	2400		0.08864	968		31	27.193	21.7	0.02065	1509		0.02065	407		6	5.26316	3.74	0.17192	1545		0.17192	625		5	4.38596	1.94	0.04524	641		0.04524	160		38	33.3333	32.45	0.14661	2849		0.14661	1362		39
GO:0051926	negative regulation of calcium ion transport	41		18	43.9024	11.51	0.02157	1672		0.08918	969		14	34.1463	7.8	0.01591	1446		0.1794	1281		2	4.87805	1.35	0.3914	2771		1	2620		1	2.43902	0.7	0.50602	2683		1	1854		17	41.4634	11.67	0.05058	2019		0.23616	1837		18
GO:0032092	positive regulation of protein binding	87		34	39.0805	24.42	0.01696	1549		0.08926	970		22	25.2874	16.56	0.09091	2308		0.30295	1958		9	10.3448	2.86	0.00216	345		0.02806	204		1	1.14943	1.48	0.7767	3277		0.7767	1283		34	39.0805	24.77	0.02087	1560		0.15725	1371		33
GO:1903427	negative regulation of reactive oxygen species biosynthetic process	22		10	45.4545	6.18	0.06158	2199		0.08946	971		10	45.4545	4.19	0.0042	1032		0.06002	703		NA	NA	NA	NA	NA		NA	NA		NA	NA	NA	NA	NA		NA	7801		11	50	6.26	0.02653	1701		0.09473	1003		10
GO:1990126	retrograde transport, endosome to plasma membrane	23		10	43.4783	6.46	0.08241	2362		0.08949	972		6	26.087	4.38	0.26381	3370		0.69638	3776		1	4.34783	0.75	0.53612	3295		0.53612	1616		1	4.34783	0.39	0.32656	2075		1	1855		8	34.7826	6.55	0.32051	3773		0.23691	1859		10
GO:0010458	exit from mitosis	28		11	39.2857	7.86	0.13419	2736		0.08953	973		9	32.1429	5.33	0.06936	2086		0.1799	1285		0	0	0.92	1	5381		1	2622		0	0	0.48	1	4649		1	1856		11	39.2857	7.97	0.1449	2831		0.23661	1842		10
GO:0030836	positive regulation of actin filament depolymerization	12		6	50	3.37	0.08958	2402		0.08958	974		2	16.6667	2.28	0.69682	5457		0.69682	3790		2	16.6667	0.39	0.05706	974		0.05706	289		0	0	0.2	1	5161		1	1857		5	41.6667	3.42	0.23689	3413		0.23689	1847		6
GO:0002829	negative regulation of type 2 immune response	12		6	50	3.37	0.08958	2403		0.08958	975		5	41.6667	2.28	0.06031	2015		0.06031	709		1	8.33333	0.39	0.33007	2482		0.33007	1176		0	0	0.2	1	4031		1	1858		6	50	3.42	0.09496	2392		0.09496	1010		6
GO:0006910	phagocytosis, recognition	12		6	50	3.37	0.08958	2404		0.08958	976		4	33.3333	2.28	0.18028	2832		0.18028	1291		1	8.33333	0.39	0.33007	2468		0.33007	1181		1	8.33333	0.2	0.18632	1445		0.18632	608		6	50	3.42	0.09496	2393		0.09496	1011		6
GO:0019471	4-hydroxyproline metabolic process	12		6	50	3.37	0.08958	2405		0.08958	977		3	25	2.28	0.40721	4097		0.40721	2551		0	0	0.39	1	5658		1	3327		0	0	0.2	1	4990		1	1859		6	50	3.42	0.09496	2395		0.09496	1012		5
GO:0007213	G protein-coupled acetylcholine receptor signaling pathway	12		6	50	3.37	0.08958	2406		0.08958	978		5	41.6667	2.28	0.06031	2017		0.06031	711		0	0	0.39	1	5228		1	2368		1	8.33333	0.2	0.18632	1456		0.18632	609		6	50	3.42	0.09496	2396		0.09496	1013		5
GO:1900119	positive regulation of execution phase of apoptosis	12		6	50	3.37	0.08958	2407		0.08958	979		4	33.3333	2.28	0.18028	2836		0.18028	1295		1	8.33333	0.39	0.33007	2476		0.33007	1183		1	8.33333	0.2	0.18632	1455		0.18632	610		6	50	3.42	0.09496	2397		0.09496	1014		6
GO:0017085	response to insecticide	12		6	50	3.37	0.08958	2408		0.08958	980		4	33.3333	2.28	0.18028	2837		0.18028	1296		0	0	0.39	1	5604		1	2627		0	0	0.2	1	4923		1	1860		6	50	3.42	0.09496	2398		0.09496	1015		6
GO:0034380	high-density lipoprotein particle assembly	12		6	50	3.37	0.08958	2409		0.08958	981		2	16.6667	2.28	0.69682	5471		0.69682	3804		0	0	0.39	1	6127		1	4096		1	8.33333	0.2	0.18632	1446		0.18632	611		7	58.3333	3.42	0.02912	1742		0.02912	549		7
GO:0051004	regulation of lipoprotein lipase activity	12		6	50	3.37	0.08958	2410		0.08958	982		5	41.6667	2.28	0.06031	2019		0.06031	713		1	8.33333	0.39	0.33007	2472		0.33007	1177		1	8.33333	0.2	0.18632	1454		0.18632	612		6	50	3.42	0.09496	2401		0.09496	1016		6
GO:0051489	regulation of filopodium assembly	37		12	32.4324	10.39	0.33381	3815		0.08969	983		9	24.3243	7.04	0.2617	3356		0.18023	1289		4	10.8108	1.21	0.03216	794		0.05678	282		1	2.7027	0.63	0.47078	2571		1	1861		12	32.4324	10.53	0.3538	3860		0.09508	1021		12
GO:0035148	tube formation	112		29	25.8929	31.44	0.72958	5797		0.09011	984		17	15.1786	21.32	0.88005	6621		0.69778	3815		3	2.67857	3.68	0.71642	3869		1	4106		1	0.892857	1.91	0.85513	3442		0.85513	1318		27	24.1071	31.88	0.87227	6775		0.23814	1865		28
GO:0043547	positive regulation of GTPase activity	341		106	31.085	95.73	0.11698	2605		0.09542	985		49	14.3695	64.9	0.99086	7472		0.96695	5096		13	3.81232	11.19	0.32953	2462		0.17165	624		5	1.46628	5.81	0.69385	3127		0.69385	1237		96	28.1525	97.07	0.57276	5082		0.57839	3645		105
GO:0006469	negative regulation of protein kinase activity	192		70	36.4583	53.9	0.00672	1213		0.09543	986		46	23.9583	36.54	0.05147	1945		0.09012	896		10	5.20833	6.3	0.10102	1224		0.44364	1430		5	2.60417	3.27	0.22967	1674		0.15551	498		73	38.0208	54.66	0.0025	945		0.03343	555		69
GO:0002218	activation of innate immune response	217		110	50.6912	60.92	1.1e-12	112		0.09617	987		90	41.4747	41.3	1.3e-14	85		0.10239	959		31	14.2857	7.12	4.3e-12	44		0.01726	149		7	3.22581	3.7	0.07792	786		1	1862		109	50.2304	61.77	7.8e-12	115		0.2202	1617		108
GO:0055114	oxidation-reduction process	838		278	33.1742	235.25	0.00046	724		0.09658	988		212	25.2983	159.49	2.3e-06	330		0.24999	1833		24	2.86396	27.5	0.78603	4080		0.90406	2060		14	1.67064	14.27	0.56936	2832		0.27005	798		277	33.0549	238.56	0.0015	869		0.21551	1612		271
GO:0032801	receptor catabolic process	31		17	54.8387	8.7	0.00153	888		0.09688	989		9	29.0323	5.9	0.11938	2474		0.3152	1974		3	9.67742	1.02	0.08018	1113		0.17299	628		1	3.22581	0.53	0.41318	2393		1	1863		18	58.0645	8.82	0.00053	725		0.1031	1028		17
GO:0007264	small GTPase mediated signal transduction	485		170	35.0515	136.15	0.00038	694		0.09691	990		90	18.5567	92.31	0.62586	4976		0.26992	1874		18	3.71134	15.92	0.32913	2461		0.04822	265		6	1.23711	8.26	0.83875	3414		0.51869	1102		157	32.3711	138.07	0.03043	1779		0.54375	3392		167
GO:0097320	plasma membrane tubulation	20		11	55	5.61	0.01013	1367		0.09724	991		4	20	3.81	0.54547	4676		0.80925	4346		1	5	0.66	0.48719	3136		1	4450		0	0	0.34	1	7490		1	1864		10	50	5.69	0.03392	1814		0.23401	1776		10
GO:0039702	viral budding via host ESCRT complex	20		11	55	5.61	0.01013	1368		0.09724	992		11	55	3.81	0.00036	660		0.04894	618		0	0	0.66	1	6304		1	2337		0	0	0.34	1	5793		1	1865		10	50	5.69	0.03392	1812		0.10371	1029		11
GO:0055085	transmembrane transport	1079		347	32.1594	302.91	0.00114	836		0.09754	993		258	23.911	205.36	1.9e-05	415		0.4613	2645		37	3.4291	35.41	0.41418	2892		0.20055	757		22	2.03892	18.37	0.21696	1621		0.75886	1276		361	33.4569	307.16	0.0001	573		0.02419	489		333
GO:0017000	antibiotic biosynthetic process	15		7	46.6667	4.21	0.09756	2441		0.09756	994		5	33.3333	2.85	0.14008	2629		0.14008	1116		1	6.66667	0.49	0.39395	2780		0.39395	1333		0	0	0.26	1	4919		1	1866		7	46.6667	4.27	0.10391	2426		0.10391	1032		7
GO:0061158	3'-UTR-mediated mRNA destabilization	15		7	46.6667	4.21	0.09756	2442		0.09756	995		4	26.6667	2.85	0.31576	3607		0.31576	1982		1	6.66667	0.49	0.39395	2781		0.39395	1338		2	13.3333	0.26	0.02619	520		0.02619	114		6	40	4.27	0.23456	3332		0.23456	1781		7
GO:1903543	positive regulation of exosomal secretion	15		7	46.6667	4.21	0.09756	2443		0.09756	996		8	53.3333	2.85	0.00304	974		0.00304	195		1	6.66667	0.49	0.39395	2795		0.39395	1328		NA	NA	NA	NA	NA		NA	7802		7	46.6667	4.27	0.10391	2427		0.10391	1033		7
GO:0097067	cellular response to thyroid hormone stimulus	15		7	46.6667	4.21	0.09756	2444		0.09756	997		7	46.6667	2.85	0.01376	1351		0.01376	332		2	13.3333	0.49	0.08515	1141		0.08515	367		2	13.3333	0.26	0.02619	517		0.02619	115		7	46.6667	4.27	0.10391	2428		0.10391	1034		7
GO:0010824	regulation of centrosome duplication	39		12	30.7692	10.95	0.41231	4209		0.09777	998		9	23.0769	7.42	0.31795	3627		0.08706	824		0	0	1.28	1	5431		1	2410		0	0	0.66	1	4731		1	1867		12	30.7692	11.1	0.43403	4243		0.10415	1037		12
GO:1902600	proton transmembrane transport	126		57	45.2381	35.37	2.7e-05	475		0.09808	999		50	39.6825	23.98	5.4e-08	217		0.02006	401		2	1.5873	4.13	0.92223	4453		0.92223	2078		1	0.793651	2.15	0.88635	3497		1	1868		60	47.619	35.87	3.7e-06	354		0.04113	599		50
GO:2001235	positive regulation of apoptotic signaling pathway	157		74	47.1338	44.07	2.6e-07	280		0.09879	1000		56	35.6688	29.88	6.1e-07	292		0.44811	2608		9	5.73248	5.15	0.07388	1060		0.54819	1632		10	6.36943	2.67	0.00035	126		0.25906	770		71	45.2229	44.69	5.2e-06	374		0.40072	2576		69
GO:0036498	IRE1-mediated unfolded protein response	59		25	42.3729	16.56	0.01269	1437		0.09894	1001		16	27.1186	11.23	0.0819	2192		0.18841	1387		3	5.08475	1.94	0.30569	2341		0.4697	1483		1	1.69492	1	0.63781	3019		1	1869		29	49.1525	16.8	0.0006	739		0.00759	273		24
GO:0032635	interleukin-6 production	105		61	58.0952	29.48	1e-10	137		0.09974	1002		45	42.8571	19.98	1.6e-08	196		0.02717	470		16	15.2381	3.45	2.9e-07	90		0.20306	758		5	4.7619	1.79	0.03356	560		0.11215	351		62	59.0476	29.89	5.2e-11	126		0.02208	416		60
GO:0045637	regulation of myeloid cell differentiation	209		84	40.1914	58.67	9.5e-05	576		0.10028	1003		60	28.7081	39.78	0.00042	676		0.12937	1033		8	3.82775	6.86	0.37967	2752		1	2505		6	2.87081	3.56	0.14696	1249		1	1870		84	40.1914	59.5	0.00016	616		0.1049	1040		82
GO:0050764	regulation of phagocytosis	71		39	54.9296	19.93	1.7e-06	343		0.10085	1004		29	40.8451	13.51	1.7e-05	411		0.39331	2424		5	7.04225	2.33	0.0834	1133		1	3250		2	2.8169	1.21	0.34145	2130		1	1871		38	53.5211	20.21	7.6e-06	398		0.31552	2247		39
GO:0051348	negative regulation of transferase activity	235		83	35.3191	65.97	0.0087	1322		0.10102	1005		57	24.2553	44.73	0.02667	1585		0.02767	473		13	5.53191	7.71	0.04641	906		1	2271		5	2.12766	4	0.37143	2258		1	1872		86	36.5957	66.9	0.00392	1041		0.1054	1042		82
GO:0032651	regulation of interleukin-1 beta production	53		32	60.3774	14.88	8.7e-07	310		0.10103	1006		28	52.8302	10.09	3.6e-08	207		0.12969	1034		9	16.9811	1.74	5e-05	159		1	2506		3	5.66038	0.9	0.06133	714		1	1873		35	66.0377	15.09	1.4e-08	184		0.10534	1041		31
GO:0010324	membrane invagination	58		33	56.8966	16.28	3.8e-06	376		0.10106	1007		23	39.6552	11.04	0.00021	596		0.39408	2428		6	10.3448	1.9	0.01156	536		1	3253		1	1.72414	0.99	0.63151	3009		1	1874		31	53.4483	16.51	5.4e-05	524		0.10584	1045		34
GO:0033619	membrane protein proteolysis	55		29	52.7273	15.44	9.7e-05	578		0.10135	1008		23	41.8182	10.47	8.1e-05	514		0.02767	472		5	9.09091	1.8	0.03379	820		1	2270		2	3.63636	0.94	0.24063	1733		0.24007	718		30	54.5455	15.66	4.2e-05	509		0.10585	1046		28
GO:0042554	superoxide anion generation	23		17	73.913	6.46	6.5e-06	400		0.10162	1009		13	56.5217	4.38	7e-05	499		0.13086	1037		2	8.69565	0.75	0.17346	1549		0.20813	773		0	0	0.39	1	5870		1	1875		16	69.5652	6.55	5.1e-05	519		0.1063	1049		16
GO:0062014	negative regulation of small molecule metabolic process	72		30	41.6667	20.21	0.0089	1330		0.10168	1010		17	23.6111	13.7	0.19729	2951		0.92908	4917		1	1.38889	2.36	0.91012	4422		1	4816		1	1.38889	1.23	0.71062	3166		1	1876		31	43.0556	20.5	0.00559	1112		0.1062	1047		30
GO:0002827	positive regulation of T-helper 1 type immune response	17		10	58.8235	4.77	0.00765	1263		0.10209	1011		8	47.0588	3.24	0.00801	1186		0.13135	1046		2	11.7647	0.56	0.10571	1245		0.32954	1163		1	5.88235	0.29	0.25334	1780		1	1877		9	52.9412	4.84	0.02893	1728		0.10678	1051		10
GO:0010310	regulation of hydrogen peroxide metabolic process	15		8	53.3333	4.21	0.03426	1844		0.10222	1012		6	40	2.85	0.04929	1881		0.13156	1050		0	0	0.49	1	5377		1	2515		0	0	0.26	1	4640		1	1878		7	46.6667	4.27	0.10391	2434		0.31813	2265		8
GO:0046135	pyrimidine nucleoside catabolic process	20		9	45	5.61	0.07932	2346		0.10225	1013		8	40	3.81	0.02427	1562		0.028	478		2	10	0.66	0.13867	1360		0.13867	490		2	10	0.34	0.04485	635		0.11292	357		11	55	5.69	0.01133	1333		0.02281	429		8
GO:0070431	nucleotide-binding oligomerization domain containing 2 signaling pathway	13		7	53.8462	3.65	0.04456	2006		0.10226	1014		5	38.4615	2.47	0.08313	2208		0.39612	2441		1	7.69231	0.43	0.35208	2602		0.35208	1241		0	0	0.22	1	7023		1	1879		5	38.4615	3.7	0.30035	3609		0.31838	2276		7
GO:0032410	negative regulation of transporter activity	54		18	33.3333	15.16	0.23547	3432		0.1023	1015		14	25.9259	10.28	0.13273	2592		0.39586	2437		2	3.7037	1.77	0.53318	3284		0.20859	837		2	3.7037	0.92	0.23432	1687		1	1880		18	33.3333	15.37	0.25618	3477		0.31815	2268		17
GO:1900543	negative regulation of purine nucleotide metabolic process	22		9	40.9091	6.18	0.13584	2756		0.1023	1016		9	40.9091	4.19	0.01464	1389		0.13135	1045		NA	NA	NA	NA	NA		NA	NA		0	0	0.37	1	7690		1	1881		10	45.4545	6.26	0.06704	2211		0.10682	1052		8
GO:0045623	negative regulation of T-helper cell differentiation	15		7	46.6667	4.21	0.09756	2445		0.10231	1017		7	46.6667	2.85	0.01376	1353		0.028	479		1	6.66667	0.49	0.39395	2818		1	2274		0	0	0.26	1	6124		1	1882		7	46.6667	4.27	0.10391	2429		0.10692	1056		7
GO:0033033	negative regulation of myeloid cell apoptotic process	12		6	50	3.37	0.08958	2411		0.10232	1018		5	41.6667	2.28	0.06031	2008		0.02806	480		1	8.33333	0.39	0.33007	2500		1	2275		1	8.33333	0.2	0.18632	1473		1	1883		7	58.3333	3.42	0.02912	1745		0.10684	1053		6
GO:2001044	regulation of integrin-mediated signaling pathway	12		6	50	3.37	0.08958	2412		0.10232	1019		5	41.6667	2.28	0.06031	2023		0.13161	1053		1	8.33333	0.39	0.33007	2517		1	2517		NA	NA	NA	NA	NA		NA	7803		6	50	3.42	0.09496	2402		0.10693	1057		6
GO:0008356	asymmetric cell division	16		7	43.75	4.49	0.13298	2714		0.10233	1020		2	12.5	3.05	0.83774	6350		1	7416		2	12.5	0.53	0.09527	1191		1	6998		0	0	0.27	1	4498		1	1884		6	37.5	4.55	0.29064	3570		0.31835	2275		7
GO:0006089	lactate metabolic process	13		6	46.1538	3.65	0.12818	2674		0.10235	1021		3	23.0769	2.47	0.46234	4306		0.77183	4164		1	7.69231	0.43	0.35208	2588		0.35208	1250		0	0	0.22	1	4171		1	1885		6	46.1538	3.7	0.13535	2653		0.10695	1059		6
GO:0002544	chronic inflammatory response	14		6	42.8571	3.93	0.1733	3050		0.10237	1022		3	21.4286	2.66	0.51509	4514		0.39659	2518		0	0	0.46	1	4895		1	3306		0	0	0.24	1	3992		1	1886		6	42.8571	3.99	0.1823	3031		0.10698	1064		6
GO:0030854	positive regulation of granulocyte differentiation	7		4	57.1429	1.97	0.10237	2477		0.10237	1023		4	57.1429	1.33	0.02806	1624		0.02806	483		0	0	0.23	1	5798		1	2277		0	0	0.12	1	5164		1	1887		4	57.1429	1.99	0.10698	2459		0.10698	1065		4
GO:0043589	skin morphogenesis	7		4	57.1429	1.97	0.10237	2478		0.10237	1024		3	42.8571	1.33	0.13174	2541		0.13174	1054		0	0	0.23	1	6459		1	2518		0	0	0.12	1	5985		1	1888		4	57.1429	1.99	0.10698	2460		0.10698	1066		4
GO:0033029	regulation of neutrophil apoptotic process	7		4	57.1429	1.97	0.10237	2479		0.10237	1025		2	28.5714	1.33	0.39652	3995		0.39652	2461		0	0	0.23	1	6023		1	3274		0	0	0.12	1	5432		1	1889		4	57.1429	1.99	0.10698	2463		0.10698	1067		4
GO:0006678	glucosylceramide metabolic process	7		4	57.1429	1.97	0.10237	2480		0.10237	1026		3	42.8571	1.33	0.13174	2544		0.13174	1057		0	0	0.23	1	5150		1	2520		0	0	0.12	1	4338		1	1890		5	71.4286	1.99	0.02287	1580		0.02287	444		4
GO:0070142	synaptic vesicle budding	7		4	57.1429	1.97	0.10237	2481		0.10237	1027		1	14.2857	1.33	0.77196	5891		0.77196	4177		1	14.2857	0.23	0.20835	1816		0.20835	815		0	0	0.12	1	6979		1	1891		4	57.1429	1.99	0.10698	2464		0.10698	1068		4
GO:0035581	sequestering of extracellular ligand from receptor	7		4	57.1429	1.97	0.10237	2482		0.10237	1028		NA	NA	NA	NA	NA		NA	7937		0	0	0.23	1	6210		1	7479		0	0	0.12	1	5668		1	1892		2	28.5714	1.99	0.63725	5357		0.63725	3906		4
GO:0008635	activation of cysteine-type endopeptidase activity involved in apoptotic process by cytochrome c	7		4	57.1429	1.97	0.10237	2483		0.10237	1029		3	42.8571	1.33	0.13174	2546		0.13174	1059		0	0	0.23	1	5288		1	2522		1	14.2857	0.12	0.1133	1005		0.1133	370		3	42.8571	1.99	0.31843	3718		0.31843	2278		4
GO:0002862	negative regulation of inflammatory response to antigenic stimulus	7		4	57.1429	1.97	0.10237	2484		0.10237	1030		3	42.8571	1.33	0.13174	2547		0.13174	1060		0	0	0.23	1	4921		1	2523		0	0	0.12	1	4041		1	1893		5	71.4286	1.99	0.02287	1581		0.02287	445		4
GO:0009120	deoxyribonucleoside metabolic process	7		4	57.1429	1.97	0.10237	2485		0.10237	1031		3	42.8571	1.33	0.13174	2548		0.13174	1061		0	0	0.23	1	5304		1	2524		0	0	0.12	1	4528		1	1894		4	57.1429	1.99	0.10698	2465		0.10698	1069		4
GO:0002553	histamine secretion by mast cell	7		4	57.1429	1.97	0.10237	2486		0.10237	1032		2	28.5714	1.33	0.39652	4003		0.39652	2469		1	14.2857	0.23	0.20835	1797		0.20835	796		0	0	0.12	1	3994		1	1895		4	57.1429	1.99	0.10698	2466		0.10698	1070		4
GO:0002578	negative regulation of antigen processing and presentation	7		4	57.1429	1.97	0.10237	2487		0.10237	1033		2	28.5714	1.33	0.39652	4004		0.39652	2470		0	0	0.23	1	4899		1	3280		0	0	0.12	1	3999		1	1896		4	57.1429	1.99	0.10698	2467		0.10698	1071		4
GO:0060068	vagina development	7		4	57.1429	1.97	0.10237	2488		0.10237	1034		2	28.5714	1.33	0.39652	4005		0.39652	2471		1	14.2857	0.23	0.20835	1801		0.20835	797		2	28.5714	0.12	0.00573	299		0.00573	53		4	57.1429	1.99	0.10698	2468		0.10698	1072		4
GO:0018401	peptidyl-proline hydroxylation to 4-hydroxy-L-proline	7		4	57.1429	1.97	0.10237	2489		0.10237	1035		1	14.2857	1.33	0.77196	5904		0.77196	4190		0	0	0.23	1	5631		1	4353		0	0	0.12	1	4958		1	1897		4	57.1429	1.99	0.10698	2469		0.10698	1073		3
GO:0071499	cellular response to laminar fluid shear stress	7		4	57.1429	1.97	0.10237	2490		0.10237	1036		2	28.5714	1.33	0.39652	4007		0.39652	2473		1	14.2857	0.23	0.20835	1778		0.20835	798		0	0	0.12	1	7167		1	1898		3	42.8571	1.99	0.31843	3719		0.31843	2279		4
GO:0046719	regulation by virus of viral protein levels in host cell	7		4	57.1429	1.97	0.10237	2491		0.10237	1037		3	42.8571	1.33	0.13174	2551		0.13174	1064		2	28.5714	0.23	0.02022	685		0.02022	167		2	28.5714	0.12	0.00573	301		0.00573	54		4	57.1429	1.99	0.10698	2472		0.10698	1074		5
GO:2000074	regulation of type B pancreatic cell development	7		4	57.1429	1.97	0.10237	2492		0.10237	1038		2	28.5714	1.33	0.39652	4013		0.39652	2479		NA	NA	NA	NA	NA		NA	NA		NA	NA	NA	NA	NA		NA	7804		5	71.4286	1.99	0.02287	1582		0.02287	446		4
GO:0007042	lysosomal lumen acidification	7		4	57.1429	1.97	0.10237	2493		0.10237	1039		4	57.1429	1.33	0.02806	1625		0.02806	484		0	0	0.23	1	5196		1	2278		1	14.2857	0.12	0.1133	1013		0.1133	371		4	57.1429	1.99	0.10698	2475		0.10698	1075		4
GO:0048280	vesicle fusion with Golgi apparatus	7		4	57.1429	1.97	0.10237	2494		0.10237	1040		4	57.1429	1.33	0.02806	1627		0.02806	486		0	0	0.23	1	6758		1	2280		0	0	0.12	1	6366		1	1899		4	57.1429	1.99	0.10698	2476		0.10698	1076		4
GO:2000394	positive regulation of lamellipodium morphogenesis	7		4	57.1429	1.97	0.10237	2495		0.10237	1041		2	28.5714	1.33	0.39652	4018		0.39652	2484		NA	NA	NA	NA	NA		NA	NA		NA	NA	NA	NA	NA		NA	7805		4	57.1429	1.99	0.10698	2477		0.10698	1077		4
GO:0044387	negative regulation of protein kinase activity by regulation of protein phosphorylation	7		4	57.1429	1.97	0.10237	2496		0.10237	1042		1	14.2857	1.33	0.77196	5922		0.77196	4208		1	14.2857	0.23	0.20835	1766		0.20835	820		0	0	0.12	1	6037		1	1900		4	57.1429	1.99	0.10698	2478		0.10698	1078		4
GO:2000321	positive regulation of T-helper 17 cell differentiation	7		4	57.1429	1.97	0.10237	2497		0.10237	1043		3	42.8571	1.33	0.13174	2555		0.13174	1068		NA	NA	NA	NA	NA		NA	NA		NA	NA	NA	NA	NA		NA	7806		3	42.8571	1.99	0.31843	3725		0.31843	2280		4
GO:0007494	midgut development	7		4	57.1429	1.97	0.10237	2498		0.10237	1044		4	57.1429	1.33	0.02806	1629		0.02806	488		1	14.2857	0.23	0.20835	1787		0.20835	778		0	0	0.12	1	4465		1	1901		4	57.1429	1.99	0.10698	2479		0.10698	1079		4
GO:2000427	positive regulation of apoptotic cell clearance	7		4	57.1429	1.97	0.10237	2499		0.10237	1045		3	42.8571	1.33	0.13174	2557		0.13174	1070		2	28.5714	0.23	0.02022	682		0.02022	168		2	28.5714	0.12	0.00573	300		0.00573	55		4	57.1429	1.99	0.10698	2480		0.10698	1080		4
GO:0003093	regulation of glomerular filtration	7		4	57.1429	1.97	0.10237	2500		0.10237	1046		2	28.5714	1.33	0.39652	4025		0.39652	2491		1	14.2857	0.23	0.20835	1820		0.20835	805		0	0	0.12	1	4070		1	1902		4	57.1429	1.99	0.10698	2481		0.10698	1081		3
GO:0015014	heparan sulfate proteoglycan biosynthetic process, polysaccharide chain biosynthetic process	7		4	57.1429	1.97	0.10237	2501		0.10237	1047		2	28.5714	1.33	0.39652	4027		0.39652	2493		0	0	0.23	1	5520		1	3291		0	0	0.12	1	4827		1	1903		5	71.4286	1.99	0.02287	1586		0.02287	447		3
GO:0071649	regulation of chemokine (C-C motif) ligand 5 production	7		4	57.1429	1.97	0.10237	2502		0.10237	1048		4	57.1429	1.33	0.02806	1630		0.02806	489		1	14.2857	0.23	0.20835	1804		0.20835	779		1	14.2857	0.12	0.1133	1009		0.1133	372		4	57.1429	1.99	0.10698	2482		0.10698	1082		4
GO:0071639	positive regulation of monocyte chemotactic protein-1 production	7		4	57.1429	1.97	0.10237	2503		0.10237	1049		3	42.8571	1.33	0.13174	2559		0.13174	1072		1	14.2857	0.23	0.20835	1805		0.20835	788		2	28.5714	0.12	0.00573	297		0.00573	56		5	71.4286	1.99	0.02287	1587		0.02287	448		4
GO:0044829	positive regulation by host of viral genome replication	7		4	57.1429	1.97	0.10237	2504		0.10237	1050		3	42.8571	1.33	0.13174	2561		0.13174	1074		0	0	0.23	1	6524		1	2530		0	0	0.12	1	6060		1	1904		4	57.1429	1.99	0.10698	2484		0.10698	1083		4
GO:0055091	phospholipid homeostasis	7		4	57.1429	1.97	0.10237	2505		0.10237	1051		1	14.2857	1.33	0.77196	5936		0.77196	4222		0	0	0.23	1	7014		1	4375		0	0	0.12	1	6678		1	1905		3	42.8571	1.99	0.31843	3734		0.31843	2281		4
GO:0038114	interleukin-21-mediated signaling pathway	7		4	57.1429	1.97	0.10237	2506		0.10237	1052		4	57.1429	1.33	0.02806	1634		0.02806	493		1	14.2857	0.23	0.20835	1791		0.20835	781		0	0	0.12	1	5783		1	1906		4	57.1429	1.99	0.10698	2485		0.10698	1084		4
GO:1904996	positive regulation of leukocyte adhesion to vascular endothelial cell	7		4	57.1429	1.97	0.10237	2507		0.10237	1053		4	57.1429	1.33	0.02806	1635		0.02806	494		1	14.2857	0.23	0.20835	1761		0.20835	782		NA	NA	NA	NA	NA		NA	7807		4	57.1429	1.99	0.10698	2486		0.10698	1085		4
GO:2000668	regulation of dendritic cell apoptotic process	7		4	57.1429	1.97	0.10237	2508		0.10237	1054		4	57.1429	1.33	0.02806	1636		0.02806	495		2	28.5714	0.23	0.02022	686		0.02022	166		2	28.5714	0.12	0.00573	302		0.00573	57		4	57.1429	1.99	0.10698	2487		0.10698	1086		4
GO:0010273	detoxification of copper ion	7		4	57.1429	1.97	0.10237	2509		0.10237	1055		5	71.4286	1.33	0.00371	1011		0.00371	205		1	14.2857	0.23	0.20835	1762		0.20835	776		1	14.2857	0.12	0.1133	1033		0.1133	373		4	57.1429	1.99	0.10698	2488		0.10698	1087		4
GO:2000601	positive regulation of Arp2/3 complex-mediated actin nucleation	7		4	57.1429	1.97	0.10237	2510		0.10237	1056		3	42.8571	1.33	0.13174	2563		0.13174	1076		NA	NA	NA	NA	NA		NA	NA		NA	NA	NA	NA	NA		NA	7808		4	57.1429	1.99	0.10698	2489		0.10698	1088		4
GO:2001135	regulation of endocytic recycling	7		4	57.1429	1.97	0.10237	2511		0.10237	1057		1	14.2857	1.33	0.77196	5946		0.77196	4232		NA	NA	NA	NA	NA		NA	NA		NA	NA	NA	NA	NA		NA	7809		3	42.8571	1.99	0.31843	3739		0.31843	2282		5
GO:0060947	cardiac vascular smooth muscle cell differentiation	7		4	57.1429	1.97	0.10237	2512		0.10237	1058		1	14.2857	1.33	0.77196	5948		0.77196	4234		0	0	0.23	1	7170		1	4383		0	0	0.12	1	6861		1	1907		4	57.1429	1.99	0.10698	2490		0.10698	1089		2
GO:0047484	regulation of response to osmotic stress	7		4	57.1429	1.97	0.10237	2513		0.10237	1059		2	28.5714	1.33	0.39652	4034		0.39652	2500		1	14.2857	0.23	0.20835	1789		0.20835	808		1	14.2857	0.12	0.1133	1023		0.1133	374		4	57.1429	1.99	0.10698	2491		0.10698	1090		4
GO:0006068	ethanol catabolic process	7		4	57.1429	1.97	0.10237	2514		0.10237	1060		0	0	1.33	1	7738		1	7738		0	0	0.23	1	5023		1	7302		0	0	0.12	1	4162		1	1908		2	28.5714	1.99	0.63725	5403		0.63725	3907		4
GO:0032202	telomere assembly	7		4	57.1429	1.97	0.10237	2515		0.10237	1061		4	57.1429	1.33	0.02806	1637		0.02806	496		0	0	0.23	1	5901		1	2283		0	0	0.12	1	5304		1	1909		4	57.1429	1.99	0.10698	2495		0.10698	1091		4
GO:0034141	positive regulation of toll-like receptor 3 signaling pathway	7		4	57.1429	1.97	0.10237	2516		0.10237	1062		2	28.5714	1.33	0.39652	4039		0.39652	2505		2	28.5714	0.23	0.02022	677		0.02022	172		0	0	0.12	1	5539		1	1910		5	71.4286	1.99	0.02287	1594		0.02287	449		3
GO:0034137	positive regulation of toll-like receptor 2 signaling pathway	7		4	57.1429	1.97	0.10237	2517		0.10237	1063		2	28.5714	1.33	0.39652	4040		0.39652	2506		2	28.5714	0.23	0.02022	678		0.02022	173		0	0	0.12	1	5536		1	1911		4	57.1429	1.99	0.10698	2496		0.10698	1092		3
GO:0050861	positive regulation of B cell receptor signaling pathway	7		4	57.1429	1.97	0.10237	2518		0.10237	1064		3	42.8571	1.33	0.13174	2568		0.13174	1081		2	28.5714	0.23	0.02022	675		0.02022	170		0	0	0.12	1	6482		1	1912		4	57.1429	1.99	0.10698	2497		0.10698	1093		4
GO:0045602	negative regulation of endothelial cell differentiation	7		4	57.1429	1.97	0.10237	2519		0.10237	1065		1	14.2857	1.33	0.77196	5961		0.77196	4247		0	0	0.23	1	6573		1	4393		0	0	0.12	1	6116		1	1913		4	57.1429	1.99	0.10698	2498		0.10698	1094		4
GO:0072718	response to cisplatin	7		4	57.1429	1.97	0.10237	2520		0.10237	1066		3	42.8571	1.33	0.13174	2571		0.13174	1084		0	0	0.23	1	7515		1	2535		0	0	0.12	1	7318		1	1914		3	42.8571	1.99	0.31843	3744		0.31843	2283		4
GO:0099550	trans-synaptic signaling, modulating synaptic transmission	7		4	57.1429	1.97	0.10237	2521		0.10237	1067		1	14.2857	1.33	0.77196	5976		0.77196	4262		1	14.2857	0.23	0.20835	1767		0.20835	828		1	14.2857	0.12	0.1133	1006		0.1133	375		3	42.8571	1.99	0.31843	3753		0.31843	2284		4
GO:0050996	positive regulation of lipid catabolic process	15		6	40	4.21	0.2238	3306		0.1024	1068		5	33.3333	2.85	0.14008	2639		0.3962	2445		0	0	0.49	1	6866		1	3264		0	0	0.26	1	6508		1	1915		6	40	4.27	0.23456	3328		0.10701	1109		7
GO:0010155	regulation of proton transport	12		5	41.6667	3.37	0.22713	3326		0.10241	1069		5	41.6667	2.28	0.06031	2009		0.02806	481		0	0	0.39	1	5368		1	2276		0	0	0.2	1	4628		1	1916		5	41.6667	3.42	0.23689	3409		0.10702	1110		5
GO:0030011	maintenance of cell polarity	12		5	41.6667	3.37	0.22713	3327		0.10241	1070		3	25	2.28	0.40721	4089		0.39651	2453		1	8.33333	0.39	0.33007	2493		0.33007	1185		0	0	0.2	1	5091		1	1917		4	33.3333	3.42	0.45984	4507		0.45984	2972		5
GO:0071295	cellular response to vitamin	23		8	34.7826	6.46	0.3052	3669		0.10242	1071		6	26.087	4.38	0.26381	3364		0.13175	1089		1	4.34783	0.75	0.53612	3308		1	2539		0	0	0.39	1	7119		1	1918		9	39.1304	6.55	0.18149	3021		0.10694	1058		8
GO:0001508	action potential	84		25	29.7619	23.58	0.40502	4193		0.10243	1072		19	22.619	15.99	0.23728	3149		0.13157	1052		3	3.57143	2.76	0.52378	3267		0.45188	1464		2	2.38095	1.43	0.42032	2413		0.67787	1226		27	32.1429	23.91	0.26182	3488		0.10688	1054		25
GO:0043217	myelin maintenance	14		5	35.7143	3.93	0.35323	3881		0.10246	1073		4	28.5714	2.66	0.26891	3397		0.26891	1870		1	7.14286	0.46	0.37336	2690		0.37336	1289		0	0	0.24	1	5931		1	1919		5	35.7143	3.99	0.36593	3895		0.10707	1112		7
GO:1901655	cellular response to ketone	74		24	32.4324	20.77	0.23686	3436		0.10247	1074		20	27.027	14.08	0.05827	1998		0.10966	1001		3	4.05405	2.43	0.43987	2969		0.4146	1386		2	2.7027	1.26	0.36001	2189		1	1920		25	33.7838	21.07	0.18641	3087		0.04353	607		25
GO:0036010	protein localization to endosome	19		6	31.5789	5.33	0.4513	4538		0.1025	1075		4	21.0526	3.62	0.50206	4476		0.39658	2517		1	5.26316	0.62	0.46977	3073		1	3305		0	0	0.32	1	5722		1	1921		5	26.3158	5.41	0.66655	5566		0.31867	2327		7
GO:0035584	calcium-mediated signaling using intracellular calcium source	18		8	44.4444	5.05	0.10251	2535		0.10251	1076		7	38.8889	3.43	0.04022	1785		0.04022	571		0	0	0.59	1	6211		1	2314		0	0	0.31	1	5669		1	1922		10	55.5556	5.12	0.01432	1390		0.01432	359		8
GO:0048268	clathrin coat assembly	18		8	44.4444	5.05	0.10251	2536		0.10251	1077		5	27.7778	3.43	0.2478	3312		0.2478	1826		0	0	0.59	1	6757		1	2934		0	0	0.31	1	6365		1	1923		8	44.4444	5.12	0.1097	2538		0.1097	1120		7
GO:0051444	negative regulation of ubiquitin-protein transferase activity	16		5	31.25	4.49	0.48143	4611		0.10251	1078		5	31.25	3.05	0.1735	2801		0.02809	501		2	12.5	0.53	0.09527	1184		0.09527	411		0	0	0.27	1	6560		1	1924		5	31.25	4.55	0.49568	4621		0.10712	1113		5
GO:0003417	growth plate cartilage development	20		6	30	5.61	0.5078	4744		0.10252	1079		3	15	3.81	0.76268	5860		0.76268	4132		0	0	0.66	1	4998		1	4315		0	0	0.34	1	4132		1	1925		6	30	5.69	0.52363	4769		0.10714	1114		6
GO:0032770	positive regulation of monooxygenase activity	24		7	29.1667	6.74	0.52948	4816		0.10253	1080		8	33.3333	4.57	0.06995	2090		0.00371	208		1	4.16667	0.79	0.55137	3362		1	2189		1	4.16667	0.41	0.33805	2110		1	1926		9	37.5	6.83	0.22105	3173		0.10697	1060		8
GO:0051589	negative regulation of neurotransmitter transport	18		5	27.7778	5.05	0.59959	5178		0.10256	1081		1	5.55556	3.43	0.9777	7320		0.9777	5122		0	0	0.59	1	6949		1	4938		0	0	0.31	1	6579		1	1927		4	22.2222	5.12	0.79861	6141		0.3188	2331		4
GO:0006869	lipid transport	253		91	35.9684	71.02	0.00351	1054		0.10274	1082		66	26.087	48.15	0.00334	993		0.12762	1029		15	5.92885	8.3	0.01993	670		0.06554	325		8	3.16206	4.31	0.06798	749		0.04489	159		90	35.5731	72.02	0.00783	1216		0.11326	1133		88
GO:0031668	cellular response to extracellular stimulus	223		82	36.7713	62.6	0.00274	1008		0.10297	1083		64	28.6996	42.44	0.00027	629		0.19097	1510		15	6.72646	7.32	0.00684	453		0.20454	760		8	3.58744	3.8	0.0372	593		0.00929	77		86	38.565	63.48	0.00066	753		0.11025	1123		80
GO:0051091	positive regulation of DNA-binding transcription factor activity	219		95	43.379	61.48	7.4e-07	304		0.10345	1084		74	33.79	41.68	1.3e-07	248		0.01556	373		14	6.39269	7.19	0.01336	558		0.75278	1928		5	2.28311	3.73	0.31746	2042		0.75803	1275		91	41.5525	62.34	2e-05	452		0.17644	1442		91
GO:0006611	protein export from nucleus	173		40	23.1214	48.57	0.94102	7193		0.10412	1085		27	15.6069	32.93	0.89726	6700		0.45914	2638		1	0.578035	5.68	0.99701	4680		1	3370		1	0.578035	2.95	0.94978	3619		0.94978	1351		39	22.5434	49.25	0.96821	7514		0.23354	1773		41
GO:0000079	regulation of cyclin-dependent protein serine/threonine kinase activity	78		27	34.6154	21.9	0.12338	2657		0.10444	1086		13	16.6667	14.85	0.746	5821		0.88846	4760		1	1.28205	2.56	0.92651	4464		0.92651	2083		1	1.28205	1.33	0.73911	3218		0.73911	1261		28	35.8974	22.2	0.09322	2374		0.1149	1137		27
GO:0008361	regulation of cell size	153		52	33.9869	42.95	0.06283	2211		0.10455	1087		31	20.2614	29.12	0.38019	3972		0.3694	2392		11	7.18954	5.02	0.01208	543		0.74058	1919		3	1.96078	2.61	0.48508	2616		1	1928		49	32.0261	43.56	0.18571	3085		0.11297	1132		50
GO:0071364	cellular response to epidermal growth factor stimulus	39		15	38.4615	10.95	0.10465	2547		0.10465	1088		8	20.5128	7.42	0.47046	4420		0.47046	2903		2	5.12821	1.28	0.36781	2665		0.36781	1266		0	0	0.66	1	7137		1	1929		13	33.3333	11.1	0.30321	3625		0.30321	2178		16
GO:0035307	positive regulation of protein dephosphorylation	39		15	38.4615	10.95	0.10465	2548		0.10532	1089		11	28.2051	7.42	0.10755	2401		0.08743	889		0	0	1.28	1	6189		1	2443		0	0	0.66	1	5635		1	1930		16	41.0256	11.1	0.06244	2185		0.04855	657		14
GO:0008654	phospholipid biosynthetic process	240		79	32.9167	67.37	0.05496	2094		0.10565	1090		45	18.75	45.68	0.57123	4758		0.00898	300		7	2.91667	7.88	0.67742	3753		0.27238	1008		1	0.416667	4.09	0.98441	3693		1	1931		81	33.75	68.32	0.04095	1894		0.007	267		74
GO:0042177	negative regulation of protein catabolic process	110		42	38.1818	30.88	0.01351	1458		0.10616	1091		30	27.2727	20.94	0.02166	1515		0.09977	950		5	4.54545	3.61	0.29383	2313		0.31912	1151		4	3.63636	1.87	0.11827	1073		0.44961	1037		40	36.3636	31.31	0.04351	1916		0.33737	2466		40
GO:0061418	regulation of transcription from RNA polymerase II promoter in response to hypoxia	29		14	48.2759	8.14	0.01637	1519		0.10661	1092		8	27.5862	5.52	0.172	2793		0.29924	1952		3	10.3448	0.95	0.06833	1042		0.18479	741		1	3.44828	0.49	0.39262	2320		0.39262	973		15	51.7241	8.26	0.00688	1170		0.05239	662		10
GO:0006904	vesicle docking involved in exocytosis	41		15	36.5854	11.51	0.14916	2869		0.10697	1093		10	24.3902	7.8	0.24253	3158		0.16136	1178		3	7.31707	1.35	0.15061	1412		0.15061	506		2	4.87805	0.7	0.15407	1259		0.15407	496		16	39.0244	11.67	0.0947	2386		0.11673	1141		15
GO:0003091	renal water homeostasis	24		10	41.6667	6.74	0.10703	2568		0.10703	1094		4	16.6667	4.57	0.69661	5445		0.69661	3781		1	4.16667	0.79	0.55137	3352		0.55137	1650		0	0	0.41	1	4069		1	1932		8	33.3333	6.83	0.37024	3935		0.37024	2511		9
GO:0045671	negative regulation of osteoclast differentiation	24		10	41.6667	6.74	0.10703	2569		0.10703	1095		7	29.1667	4.57	0.15643	2739		0.15643	1170		2	8.33333	0.79	0.18536	1695		0.18536	746		1	4.16667	0.41	0.33805	2103		0.33805	904		10	41.6667	6.83	0.11555	2568		0.11555	1138		10
GO:0051881	regulation of mitochondrial membrane potential	63		23	36.5079	17.69	0.09024	2427		0.1073	1096		23	36.5079	11.99	0.00085	744		0.02157	410		4	6.34921	2.07	0.15187	1420		0.76829	1942		2	3.1746	1.07	0.29126	1950		0.5298	1110		26	41.2698	17.93	0.01955	1523		0.05538	669		23
GO:0045746	negative regulation of Notch signaling pathway	30		12	40	8.42	0.10753	2576		0.10753	1097		8	26.6667	5.71	0.19784	2955		0.19784	1523		0	0	0.98	1	6610		1	2775		0	0	0.51	1	6159		1	1933		11	36.6667	8.54	0.21059	3138		0.21059	1606		13
GO:0032526	response to retinoic acid	77		25	32.4675	21.62	0.22907	3420		0.10764	1098		15	19.4805	14.66	0.50603	4497		0.24375	1816		3	3.8961	2.53	0.4657	3048		0.22213	850		2	2.5974	1.31	0.37837	2274		0.37837	954		27	35.0649	21.92	0.12402	2601		0.05569	671		25
GO:0007584	response to nutrient	175		65	37.1429	49.13	0.00546	1156		0.10845	1099		54	30.8571	33.31	0.00011	537		0.00822	273		9	5.14286	5.74	0.12237	1322		0.43575	1421		4	2.28571	2.98	0.34815	2136		0.71834	1252		70	40	49.82	0.00063	742		0.07913	863		65
GO:0006511	ubiquitin-dependent protein catabolic process	543		188	34.6225	152.44	0.00039	703		0.10858	1100		130	23.9411	103.35	0.00218	910		0.66286	3738		20	3.68324	17.82	0.32909	2458		0.35035	1229		4	0.736648	9.25	0.98445	3694		0.72907	1258		199	36.6483	154.58	1.5e-05	435		0.04343	606		179
GO:0048839	inner ear development	111		24	21.6216	31.16	0.95102	7295		0.10875	1101		15	13.5135	21.13	0.95123	7110		0.30227	1956		3	2.7027	3.64	0.71072	3860		0.64555	1784		3	2.7027	1.89	0.29319	1955		0.41226	993		22	19.8198	31.6	0.98606	7702		0.11777	1145		23
GO:0033209	tumor necrosis factor-mediated signaling pathway	108		43	39.8148	30.32	0.00543	1150		0.11063	1102		37	34.2593	20.56	0.00013	550		0.00456	213		6	5.55556	3.54	0.14415	1386		0.2682	1002		0	0	1.84	1	5461		1	1934		43	39.8148	30.74	0.0071	1176		0.28125	1916		42
GO:0048870	cell motility	1189		394	33.1371	333.79	3.3e-05	489		0.11181	1103		275	23.1287	226.3	0.00013	551		0.28113	1878		53	4.45753	39.02	0.01312	554		1	2955		32	2.69134	20.25	0.00623	314		0.20328	656		396	33.3053	338.48	7.3e-05	552		0.11796	1146		393
GO:0045861	negative regulation of proteolysis	249		116	46.5863	69.9	2.8e-10	147		0.11397	1104		75	30.1205	47.39	1.4e-05	402		0.02567	445		15	6.0241	8.17	0.01752	639		1	2261		8	3.21285	4.24	0.06318	728		1	1935		114	45.7831	70.88	3.5e-09	162		0.12021	1148		112
GO:0043405	regulation of MAP kinase activity	284		122	42.9577	79.73	4e-08	228		0.1144	1105		74	26.0563	54.05	0.00204	906		0.28872	1893		19	6.69014	9.32	0.00265	365		1	2960		4	1.40845	4.84	0.71658	3180		0.1876	622		120	42.2535	80.85	3.5e-07	270		0.30219	2177		118
GO:0050777	negative regulation of immune response	109		62	56.8807	30.6	2.4e-10	145		0.11572	1106		51	46.789	20.75	3.7e-11	132		0.10082	953		13	11.9266	3.58	5.7e-05	162		0.46237	1475		7	6.42202	1.86	0.00259	224		1	1936		60	55.0459	31.03	4.8e-09	165		0.30435	2183		61
GO:0006629	lipid metabolic process	1098		362	32.969	308.24	0.00011	592		0.11613	1107		259	23.5883	208.98	5e-05	476		0.13644	1099		47	4.28051	36.03	0.03553	841		0.33217	1216		22	2.00364	18.7	0.24161	1742		0.46587	1048		361	32.878	312.57	0.00046	704		0.06975	788		353
GO:0031330	negative regulation of cellular catabolic process	213		81	38.0282	59.79	0.00096	816		0.11688	1108		61	28.6385	40.54	0.0004	671		0.10203	956		4	1.87793	6.99	0.92285	4455		1	2477		4	1.87793	3.63	0.49271	2636		0.90596	1337		81	38.0282	60.64	0.0015	868		0.12295	1150		78
GO:0032609	interferon-gamma production	90		43	47.7778	25.27	5.3e-05	535		0.11731	1109		36	40	17.13	3.1e-06	341		0.28904	1894		10	11.1111	2.95	0.00072	278		0.28012	1013		6	6.66667	1.53	0.00432	273		1	1937		42	46.6667	25.62	0.00018	626		0.03631	568		41
GO:0032509	endosome transport via multivesicular body sorting pathway	24		12	50	6.74	0.01863	1591		0.11877	1110		11	45.8333	4.57	0.00249	944		0.02662	448		2	8.33333	0.79	0.18536	1696		0.41331	1362		0	0	0.41	1	5369		1	1938		13	54.1667	6.83	0.00711	1181		0.12467	1153		12
GO:0036499	PERK-mediated unfolded protein response	19		10	52.6316	5.33	0.02051	1610		0.11884	1111		7	36.8421	3.62	0.05353	1952		0.02676	454		5	26.3158	0.62	0.0003	222		0.0002	29		3	15.7895	0.32	0.00386	256		0.00386	43		10	52.6316	5.41	0.02262	1572		0.12486	1154		9
GO:0016079	synaptic vesicle exocytosis	84		28	33.3333	23.58	0.1694	2988		0.11886	1112		17	20.2381	15.99	0.4322	4190		0.14029	1140		7	8.33333	2.76	0.02025	696		0.12602	470		4	4.7619	1.43	0.05504	682		0.21224	663		27	32.1429	23.91	0.26182	3489		0.12504	1155		28
GO:0051384	response to glucocorticoid	103		40	38.835	28.91	0.0115	1406		0.11893	1113		37	35.9223	19.6	4e-05	453		0.00817	272		4	3.8835	3.38	0.439	2965		0.28825	1086		8	7.76699	1.75	0.00037	128		0.00727	64		41	39.8058	29.32	0.00846	1229		0.13139	1180		38
GO:0046475	glycerophospholipid catabolic process	17		8	47.0588	4.77	0.07473	2296		0.119	1114		8	47.0588	3.24	0.00801	1185		0.02669	450		2	11.7647	0.56	0.10571	1236		0.10571	425		0	0	0.29	1	6271		1	1939		8	47.0588	4.84	0.08029	2286		0.12504	1156		7
GO:0006833	water transport	10		5	50	2.81	0.11912	2616		0.11912	1115		5	50	1.9	0.02677	1587		0.02677	455		0	0	0.33	1	5175		1	2263		0	0	0.17	1	4367		1	1940		4	40	2.85	0.30997	3649		0.30997	2203		4
GO:0002430	complement receptor mediated signaling pathway	10		5	50	2.81	0.11912	2617		0.11912	1116		4	40	1.9	0.10437	2357		0.10437	973		1	10	0.33	0.2838	2250		0.2838	1044		1	10	0.17	0.15786	1303		0.15786	514		5	50	2.85	0.12516	2603		0.12516	1159		5
GO:0051561	positive regulation of mitochondrial calcium ion concentration	10		5	50	2.81	0.11912	2618		0.11912	1117		4	40	1.9	0.10437	2358		0.10437	974		0	0	0.33	1	6939		1	2486		1	10	0.17	0.15786	1275		0.15786	515		6	60	2.85	0.03694	1838		0.03694	584		5
GO:0070269	pyroptosis	10		5	50	2.81	0.11912	2619		0.11912	1118		4	40	1.9	0.10437	2360		0.10437	976		2	20	0.33	0.04061	869		0.04061	247		1	10	0.17	0.15786	1290		0.15786	516		5	50	2.85	0.12516	2604		0.12516	1160		4
GO:0070234	positive regulation of T cell apoptotic process	10		5	50	2.81	0.11912	2620		0.11912	1119		5	50	1.9	0.02677	1589		0.02677	457		1	10	0.33	0.2838	2232		0.2838	1038		1	10	0.17	0.15786	1293		0.15786	517		4	40	2.85	0.30997	3651		0.30997	2204		5
GO:0033235	positive regulation of protein sumoylation	10		5	50	2.81	0.11912	2621		0.11912	1120		3	30	1.9	0.29315	3500		0.29315	1914		0	0	0.33	1	6059		1	2970		0	0	0.17	1	5465		1	1941		5	50	2.85	0.12516	2605		0.12516	1161		5
GO:0046886	positive regulation of hormone biosynthetic process	10		5	50	2.81	0.11912	2622		0.11912	1121		4	40	1.9	0.10437	2363		0.10437	979		0	0	0.33	1	6721		1	2488		1	10	0.17	0.15786	1292		0.15786	518		5	50	2.85	0.12516	2606		0.12516	1162		4
GO:0007256	activation of JNKK activity	10		5	50	2.81	0.11912	2623		0.11912	1122		5	50	1.9	0.02677	1596		0.02677	464		3	30	0.33	0.00355	381		0.00355	71		0	0	0.17	1	4450		1	1942		5	50	2.85	0.12516	2608		0.12516	1163		5
GO:0010248	establishment or maintenance of transmembrane electrochemical gradient	10		5	50	2.81	0.11912	2624		0.11912	1123		5	50	1.9	0.02677	1598		0.02677	466		1	10	0.33	0.2838	2236		0.2838	1042		1	10	0.17	0.15786	1302		0.15786	519		5	50	2.85	0.12516	2610		0.12516	1164		5
GO:1904903	ESCRT III complex disassembly	10		5	50	2.81	0.11912	2625		0.11912	1124		4	40	1.9	0.10437	2366		0.10437	982		NA	NA	NA	NA	NA		NA	NA		NA	NA	NA	NA	NA		NA	7810		6	60	2.85	0.03694	1846		0.03694	585		5
GO:0010744	positive regulation of macrophage derived foam cell differentiation	10		5	50	2.81	0.11912	2626		0.11912	1125		3	30	1.9	0.29315	3514		0.29315	1928		1	10	0.33	0.2838	2241		0.2838	1056		1	10	0.17	0.15786	1307		0.15786	520		5	50	2.85	0.12516	2611		0.12516	1165		5
GO:0072321	chaperone-mediated protein transport	10		5	50	2.81	0.11912	2627		0.11912	1126		5	50	1.9	0.02677	1600		0.02677	468		1	10	0.33	0.2838	2244		0.2838	1043		1	10	0.17	0.15786	1295		0.15786	521		4	40	2.85	0.30997	3668		0.30997	2205		5
GO:0035461	vitamin transmembrane transport	10		5	50	2.81	0.11912	2628		0.11912	1127		2	20	1.9	0.59436	4847		0.59436	3275		0	0	0.33	1	6200		1	3775		0	0	0.17	1	5657		1	1943		5	50	2.85	0.12516	2614		0.12516	1166		4
GO:0072594	establishment of protein localization to organelle	521		148	28.4069	146.26	0.44825	4526		0.11918	1128		116	22.2649	99.16	0.03309	1719		0.75148	4110		12	2.30326	17.1	0.92637	4463		1	4304		5	0.959693	8.87	0.94556	3611		1	1944		142	27.2553	148.32	0.74916	5903		0.31153	2234		147
GO:0033280	response to vitamin D	26		9	34.6154	7.3	0.29221	3593		0.11918	1129		8	30.7692	4.95	0.10489	2385		0.02677	469		1	3.84615	0.85	0.58039	3453		1	2269		1	3.84615	0.44	0.36044	2196		0.36044	932		10	38.4615	7.4	0.17912	3003		0.1251	1157		9
GO:0006693	prostaglandin metabolic process	30		10	33.3333	8.42	0.32213	3792		0.1192	1130		5	16.6667	5.71	0.70113	5494		0.59456	3282		0	0	0.98	1	5154		1	3781		1	3.33333	0.51	0.40299	2368		1	1945		11	36.6667	8.54	0.21059	3136		0.03698	588		11
GO:0032868	response to insulin	217		81	37.3272	60.92	0.00179	909		0.11937	1131		65	29.9539	41.3	6.3e-05	493		0.02293	416		14	6.45161	7.12	0.01241	545		0.00255	67		8	3.68664	3.7	0.03244	547		0.0059	60		82	37.788	61.77	0.00173	886		0.07499	850		81
GO:0007051	spindle organization	156		35	22.4359	43.79	0.9547	7328		0.12042	1132		15	9.61538	29.69	0.99961	7600		1	5902		2	1.28205	5.12	0.9662	4560		0.85774	2020		1	0.641026	2.66	0.9325	3587		1	1946		37	23.7179	44.41	0.92307	7131		0.31171	2235		34
GO:0070374	positive regulation of ERK1 and ERK2 cascade	160		52	32.5	44.92	0.12269	2655		0.12269	1133		42	26.25	30.45	0.01501	1402		0.01501	360		9	5.625	5.25	0.08097	1122		0.08097	361		8	5	2.72	0.00609	312		0.00609	61		46	28.75	45.55	0.49843	4723		0.49843	3325		51
GO:0048146	positive regulation of fibroblast proliferation	43		16	37.2093	12.07	0.12323	2656		0.12323	1134		12	27.907	8.18	0.10192	2350		0.10192	955		1	2.32558	1.41	0.76241	4012		0.76241	1938		1	2.32558	0.73	0.52275	2711		0.52275	1105		14	32.5581	12.24	0.32802	3795		0.32802	2454		14
GO:0010942	positive regulation of cell death	575		229	39.8261	161.42	3.4e-10	149		0.12388	1135		171	29.7391	109.44	1.6e-10	140		0.01506	361		32	5.56522	18.87	0.00248	356		1	2236		21	3.65217	9.79	0.00082	162		0.03751	147		225	39.1304	163.69	1.1e-08	178		0.13344	1184		222
GO:0032869	cellular response to insulin stimulus	174		65	37.3563	48.85	0.00469	1117		0.12415	1136		51	29.3103	33.12	0.00065	720		0.00075	106		8	4.5977	5.71	0.21317	1864		0.04408	259		4	2.29885	2.96	0.34428	2131		0.26587	780		65	37.3563	49.53	0.00661	1152		0.08689	982		65
GO:0050714	positive regulation of protein secretion	188		84	44.6809	52.78	7.3e-07	303		0.12436	1137		61	32.4468	35.78	7.2e-06	379		0.63894	3359		21	11.1702	6.17	9.5e-07	110		0.75472	1933		5	2.65957	3.2	0.2173	1622		1	1947		89	47.3404	53.52	2.6e-08	192		0.03445	560		82
GO:0043525	positive regulation of neuron apoptotic process	40		15	37.5	11.23	0.12578	2665		0.12578	1138		16	40	7.61	0.00169	863		0.00169	148		1	2.5	1.31	0.73731	3951		0.73731	1911		0	0	0.68	1	5974		1	1948		18	45	11.39	0.01881	1493		0.01881	386		15
GO:0043087	regulation of GTPase activity	406		126	31.0345	113.98	0.09878	2456		0.12624	1139		58	14.2857	77.27	0.99558	7528		0.73949	4095		15	3.69458	13.32	0.35588	2636		0.34292	1221		6	1.47783	6.91	0.69423	3128		0.67485	1224		115	28.3251	115.58	0.54499	4867		0.23375	1774		124
GO:0061136	regulation of proteasomal protein catabolic process	166		57	34.3373	46.6	0.04459	2013		0.12705	1140		44	26.506	31.59	0.01096	1293		0.22095	1546		7	4.21687	5.45	0.30369	2337		1	2783		3	1.80723	2.83	0.5398	2775		0.8634	1320		61	36.747	47.26	0.01226	1354		0.1337	1185		55
GO:1903146	regulation of autophagy of mitochondrion	39		20	51.2821	10.95	0.00181	914		0.12725	1141		13	33.3333	7.42	0.02427	1558		0.22253	1551		NA	NA	NA	NA	NA		NA	NA		NA	NA	NA	NA	NA		NA	7811		19	48.7179	11.1	0.00578	1128		0.13455	1188		21
GO:0019068	virion assembly	36		19	52.7778	10.11	0.00151	883		0.12727	1142		16	44.4444	6.85	0.00042	678		0.22172	1548		1	2.77778	1.18	0.69968	3829		0.69968	1849		1	2.77778	0.61	0.46159	2539		0.46159	1042		19	52.7778	10.25	0.00181	887		0.04749	641		18
GO:0006892	post-Golgi vesicle-mediated transport	94		34	36.1702	26.39	0.05318	2079		0.12745	1143		24	25.5319	17.89	0.07314	2110		0.4607	2641		6	6.38298	3.08	0.08855	1166		1	3371		2	2.12766	1.6	0.47763	2587		1	1949		36	38.2979	26.76	0.02472	1648		0.13435	1187		34
GO:0050769	positive regulation of neurogenesis	345		104	30.1449	96.85	0.20886	3168		0.1275	1144		56	16.2319	65.66	0.92331	6920		1	7112		13	3.76812	11.32	0.3446	2572		1	6719		6	1.73913	5.87	0.53713	2754		1	1950		97	28.1159	98.21	0.57895	5179		0.13586	1208		101
GO:0008631	intrinsic apoptotic signaling pathway in response to oxidative stress	41		18	43.9024	11.51	0.02157	1673		0.12761	1145		12	29.2683	7.8	0.07538	2165		0.7384	4068		2	4.87805	1.35	0.3914	2766		0.39384	1326		1	2.43902	0.7	0.50602	2677		0.50602	1091		18	43.9024	11.67	0.0248	1649		0.13477	1189		19
GO:0008203	cholesterol metabolic process	112		37	33.0357	31.44	0.14304	2857		0.12776	1146		23	20.5357	21.32	0.37886	3967		0.40731	2561		2	1.78571	3.68	0.88672	4362		0.88672	2043		3	2.67857	1.91	0.29785	1965		0.13088	447		38	33.9286	31.88	0.11975	2592		0.1395	1215		37
GO:0045785	positive regulation of cell adhesion	328		126	38.4146	92.08	2.6e-05	473		0.12782	1147		91	27.7439	62.43	6.5e-05	496		0.14111	1144		23	7.0122	10.76	0.00052	261		1	2554		10	3.04878	5.59	0.05435	681		0.85056	1315		125	38.1098	93.37	8.5e-05	560		0.06943	785		125
GO:0010812	negative regulation of cell-substrate adhesion	50		18	36	14.04	0.13804	2762		0.12795	1148		10	20	9.52	0.48737	4446		0.73924	4074		1	2	1.64	0.81206	4139		1	4281		0	0	0.85	1	4728		1	1951		20	40	14.23	0.0523	2027		0.13485	1190		17
GO:0046578	regulation of Ras protein signal transduction	193		58	30.0518	54.18	0.29329	3598		0.12797	1149		23	11.9171	36.73	0.99717	7549		0.46655	2685		2	1.03627	6.33	0.98837	4639		1	3394		3	1.5544	3.29	0.64201	3027		1	1952		54	27.9793	54.94	0.58747	5192		0.13582	1207		57
GO:0090136	epithelial cell-cell adhesion	13		6	46.1538	3.65	0.12818	2675		0.12818	1150		1	7.69231	2.47	0.93582	6980		0.93582	4943		0	0	0.43	1	7563		1	4829		0	0	0.22	1	7377		1	1953		6	46.1538	3.7	0.13535	2654		0.13535	1196		6
GO:2000010	positive regulation of protein localization to cell surface	13		6	46.1538	3.65	0.12818	2676		0.12818	1151		6	46.1538	2.47	0.0238	1540		0.0238	437		NA	NA	NA	NA	NA		NA	NA		NA	NA	NA	NA	NA		NA	7812		6	46.1538	3.7	0.13535	2656		0.13535	1197		6
GO:1900273	positive regulation of long-term synaptic potentiation	13		6	46.1538	3.65	0.12818	2677		0.12818	1152		3	23.0769	2.47	0.46234	4291		0.46234	2656		NA	NA	NA	NA	NA		NA	NA		1	7.69231	0.22	0.20018	1515		0.20018	636		6	46.1538	3.7	0.13535	2659		0.13535	1198		7
GO:0015721	bile acid and bile salt transport	13		6	46.1538	3.65	0.12818	2678		0.12818	1153		4	30.7692	2.47	0.22346	3030		0.22346	1567		0	0	0.43	1	5529		1	2791		0	0	0.22	1	4834		1	1954		5	38.4615	3.7	0.30035	3608		0.30035	2168		6
GO:0034497	protein localization to phagophore assembly site	13		6	46.1538	3.65	0.12818	2679		0.12818	1154		4	30.7692	2.47	0.22346	3031		0.22346	1568		0	0	0.43	1	6144		1	2792		0	0	0.22	1	5575		1	1955		8	61.5385	3.7	0.01306	1366		0.01306	354		7
GO:1901998	toxin transport	37		14	37.8378	10.39	0.12821	2690		0.12821	1155		5	13.5135	7.04	0.85899	6486		0.85899	4633		2	5.40541	1.21	0.34388	2564		0.34388	1224		NA	NA	NA	NA	NA		NA	7813		14	37.8378	10.53	0.14014	2686		0.14014	1217		13
GO:0016575	histone deacetylation	82		34	41.4634	23.02	0.00611	1186		0.12882	1156		22	26.8293	15.61	0.05244	1949		0.18318	1367		2	2.43902	2.69	0.75581	3994		0.85123	2013		0	0	1.4	1	4914		1	1956		29	35.3659	23.34	0.10434	2446		0.23883	1866		33
GO:0002526	acute inflammatory response	110		57	51.8182	30.88	1.1e-07	254		0.12929	1157		43	39.0909	20.94	7.4e-07	299		0.16912	1256		12	10.9091	3.61	0.00026	219		0.40785	1359		7	6.36364	1.87	0.00273	227		1	1957		56	50.9091	31.31	5.3e-07	284		0.13749	1212		56
GO:0042886	amide transport	1842		603	32.7362	517.1	1.2e-06	327		0.12934	1158		432	23.4528	350.58	1.9e-07	262		0.22844	1578		78	4.23453	60.45	0.0096	499		1	2796		27	1.4658	31.37	0.82753	3385		1	1958		610	33.1162	524.37	1.4e-06	313		0.42401	2689		591
GO:0032388	positive regulation of intracellular transport	216		74	34.2593	60.64	0.02637	1752		0.13034	1159		52	24.0741	41.11	0.03746	1774		0.52615	2959		6	2.77778	7.09	0.71698	3870		1	3569		0	0	3.68	1	5348		1	1959		72	33.3333	61.49	0.06556	2206		0.07404	848		73
GO:0060079	excitatory postsynaptic potential	61		21	34.4262	17.12	0.16701	2977		0.13039	1160		15	24.5902	11.61	0.17113	2788		0.09674	943		2	3.27869	2	0.59965	3512		0.6788	1820		1	1.63934	1.04	0.6501	3044		0.6501	1209		19	31.1475	17.37	0.36672	3920		0.24011	1867		22
GO:0034198	cellular response to amino acid starvation	44		14	31.8182	12.35	0.34234	3855		0.13088	1161		13	29.5455	8.37	0.06163	2035		0.01895	396		3	6.81818	1.44	0.17464	1559		0.17464	634		3	6.81818	0.75	0.03869	605		0.03869	150		13	29.5455	12.53	0.49379	4604		0.24049	1868		13
GO:0051865	protein autoubiquitination	61		21	34.4262	17.12	0.16701	2978		0.13104	1162		14	22.9508	11.61	0.26161	3353		0.25807	1842		5	8.19672	2	0.04939	940		0.1106	434		0	0	1.04	1	6613		1	1960		20	32.7869	17.37	0.26778	3507		0.22142	1624		19
GO:0055072	iron ion homeostasis	77		33	42.8571	21.62	0.00373	1061		0.13159	1163		21	27.2727	14.66	0.04884	1879		0.36151	2375		2	2.5974	2.53	0.72423	3895		1	3231		2	2.5974	1.31	0.37837	2273		0.27858	807		35	45.4545	21.92	0.00108	824		0.05532	668		30
GO:0051248	negative regulation of protein metabolic process	874		312	35.6979	245.36	2.2e-07	276		0.13197	1164		212	24.2563	166.34	4.4e-05	465		0.64388	3362		41	4.69108	28.68	0.01301	552		1	3823		24	2.746	14.88	0.01386	416		1	1961		308	35.2403	248.81	3.9e-06	358		0.13747	1211		303
GO:0071363	cellular response to growth factor stimulus	499		152	30.4609	140.08	0.12347	2658		0.13232	1165		92	18.4369	94.97	0.65338	5323		0.27679	1877		12	2.40481	16.38	0.89904	4387		0.51899	1566		7	1.40281	8.5	0.75101	3234		1	1962		150	30.0601	142.05	0.22472	3182		0.1438	1352		147
GO:0007200	phospholipase C-activating G protein-coupled receptor signaling pathway	54		19	35.1852	15.16	0.15529	2888		0.13239	1166		14	25.9259	10.28	0.13273	2591		0.37407	2409		5	9.25926	1.77	0.03153	793		0.01782	150		3	5.55556	0.92	0.06415	731		0.41086	990		18	33.3333	15.37	0.25618	3476		0.24726	1876		19
GO:0099003	vesicle-mediated transport in synapse	180		62	34.4444	50.53	0.03532	1881		0.13247	1167		33	18.3333	34.26	0.6251	4975		0.60402	3301		8	4.44444	5.91	0.23975	2042		1	3793		6	3.33333	3.07	0.08743	882		0.1348	449		57	31.6667	51.24	0.19012	3088		0.39957	2574		62
GO:0042744	hydrogen peroxide catabolic process	31		12	38.7097	8.7	0.13251	2706		0.13251	1168		13	41.9355	5.9	0.00276	949		0.00276	184		1	3.22581	1.02	0.645	3653		0.645	1778		3	9.67742	0.53	0.01541	438		0.01541	97		12	38.7097	8.82	0.14368	2813		0.14368	1349		11
GO:0043536	positive regulation of blood vessel endothelial cell migration	47		16	34.0426	13.19	0.22364	3305		0.13261	1169		14	29.7872	8.95	0.05045	1896		0.00852	290		1	2.12766	1.54	0.79219	4085		0.79219	1965		1	2.12766	0.8	0.55454	2804		0.55454	1131		16	34.0426	13.38	0.24245	3452		0.1438	1353		16
GO:0048011	neurotrophin TRK receptor signaling pathway	24		10	41.6667	6.74	0.10703	2570		0.13286	1170		7	29.1667	4.57	0.15643	2733		0.06661	731		2	8.33333	0.79	0.18536	1691		0.18536	743		0	0	0.41	1	6335		1	1963		10	41.6667	6.83	0.11555	2569		0.14097	1220		9
GO:0070102	interleukin-6-mediated signaling pathway	16		7	43.75	4.49	0.13298	2715		0.13298	1171		3	18.75	3.05	0.61148	4915		0.61148	3315		1	6.25	0.53	0.41386	2861		0.41386	1375		0	0	0.27	1	6973		1	1964		6	37.5	4.55	0.29064	3561		0.29064	2140		6
GO:0021772	olfactory bulb development	16		7	43.75	4.49	0.13298	2716		0.13298	1172		5	31.25	3.05	0.1735	2805		0.1735	1271		1	6.25	0.53	0.41386	2853		0.41386	1369		0	0	0.27	1	5045		1	1965		6	37.5	4.55	0.29064	3566		0.29064	2141		6
GO:0010804	negative regulation of tumor necrosis factor-mediated signaling pathway	16		7	43.75	4.49	0.13298	2717		0.13298	1173		4	25	3.05	0.36318	3907		0.36318	2384		1	6.25	0.53	0.41386	2846		0.41386	1373		0	0	0.27	1	4725		1	1966		8	50	4.55	0.05612	2054		0.05612	681		6
GO:0061952	midbody abscission	16		7	43.75	4.49	0.13298	2718		0.13298	1174		7	43.75	3.05	0.02052	1502		0.02052	406		0	0	0.53	1	7236		1	2246		0	0	0.27	1	6957		1	1967		8	50	4.55	0.05612	2057		0.05612	682		7
GO:0051497	negative regulation of stress fiber assembly	16		7	43.75	4.49	0.13298	2719		0.13298	1175		3	18.75	3.05	0.61148	4931		0.61148	3331		0	0	0.53	1	6935		1	3810		0	0	0.27	1	6568		1	1968		8	50	4.55	0.05612	2058		0.05612	683		6
GO:0002092	positive regulation of receptor internalization	16		7	43.75	4.49	0.13298	2720		0.13298	1176		3	18.75	3.05	0.61148	4932		0.61148	3332		0	0	0.53	1	4863		1	3811		0	0	0.27	1	3933		1	1969		5	31.25	4.55	0.49568	4630		0.49568	3265		6
GO:0045776	negative regulation of blood pressure	27		10	37.037	7.58	0.20231	3145		0.13299	1177		7	25.9259	5.14	0.24324	3295		0.17352	1275		1	3.7037	0.89	0.59418	3489		0.59418	1713		0	0	0.46	1	6165		1	1970		10	37.037	7.69	0.21585	3154		0.14111	1225		10
GO:0010803	regulation of tumor necrosis factor-mediated signaling pathway	53		23	43.3962	14.88	0.0119	1411		0.13317	1178		18	33.9623	10.09	0.00718	1159		0.0282	502		3	5.66038	1.74	0.25183	2065		0.60649	1725		0	0	0.9	1	4724		1	1971		25	47.1698	15.09	0.0029	982		0.01278	348		22
GO:0050709	negative regulation of protein secretion	101		41	40.5941	28.35	0.00438	1099		0.1335	1179		32	31.6832	19.22	0.00158	856		0.01706	390		9	8.91089	3.31	0.0059	428		0.12531	468		3	2.9703	1.72	0.24706	1754		0.2028	653		42	41.5842	28.75	0.0031	1004		0.14223	1230		41
GO:0051051	negative regulation of transport	356		150	42.1348	99.94	5.6e-09	195		0.13382	1180		109	30.618	67.76	7e-08	225		0.23657	1637		19	5.33708	11.68	0.0259	742		1	2825		9	2.52809	6.06	0.15456	1265		0.22516	687		145	40.7303	101.34	3.2e-07	266		0.43289	2716		149
GO:0001938	positive regulation of endothelial cell proliferation	70		26	37.1429	19.65	0.06212	2209		0.13382	1181		19	27.1429	13.32	0.06142	2034		0.06561	722		1	1.42857	2.3	0.90388	4399		0.90388	2059		1	1.42857	1.19	0.70045	3148		0.70045	1242		26	37.1429	19.93	0.07194	2226		0.14854	1364		26
GO:0023061	signal release	494		188	38.0567	138.68	6.2e-07	298		0.13384	1182		131	26.5182	94.02	2e-05	421		0.64566	3366		38	7.69231	16.21	9.3e-07	109		1	3825		13	2.63158	8.41	0.07984	789		1	1972		188	38.0567	140.63	1.7e-06	322		0.43219	2715		178
GO:0043392	negative regulation of DNA binding	42		16	38.0952	11.79	0.10317	2542		0.13397	1183		15	35.7143	7.99	0.00815	1197		0.06886	734		2	4.7619	1.38	0.40305	2831		0.40305	1356		0	0	0.72	1	5955		1	1973		15	35.7143	11.96	0.19017	3091		0.25495	1881		16
GO:0048593	camera-type eye morphogenesis	67		14	20.8955	18.81	0.92971	7131		0.13413	1184		8	11.9403	12.75	0.95627	7128		0.50385	2925		1	1.49254	2.2	0.8937	4377		1	3555		3	4.47761	1.14	0.10593	989		0.10593	346		14	20.8955	19.07	0.93864	7250		0.29224	2153		12
GO:0051262	protein tetramerization	118		45	38.1356	33.13	0.01111	1382		0.13416	1185		28	23.7288	22.46	0.11903	2472		0.81663	4492		5	4.23729	3.87	0.34568	2573		0.82867	1996		2	1.69492	2.01	0.60007	2914		0.5985	1167		42	35.5932	33.59	0.05474	2041		0.2703	1895		44
GO:0006509	membrane protein ectodomain proteolysis	39		19	48.7179	10.95	0.00489	1125		0.1343	1186		16	41.0256	7.42	0.00123	806		0.053	680		4	10.2564	1.28	0.03808	852		0.12678	471		1	2.5641	0.66	0.4887	2630		1	1974		21	53.8462	11.1	0.00074	768		0.06174	754		19
GO:0048167	regulation of synaptic plasticity	122		42	34.4262	34.25	0.07305	2289		0.13444	1187		27	22.1311	23.22	0.22062	3017		0.03505	522		2	1.63934	4	0.91332	4435		0.9439	2098		5	4.09836	2.08	0.05742	694		1	1975		43	35.2459	34.73	0.06076	2137		0.26165	1885		38
GO:0007029	endoplasmic reticulum organization	49		18	36.7347	13.76	0.11798	2607		0.13513	1188		12	24.4898	9.33	0.20983	2995		0.37264	2402		5	10.2041	1.61	0.02169	706		0.2807	1014		1	2.04082	0.83	0.56964	2833		0.56964	1139		16	32.6531	13.95	0.30554	3632		0.42007	2684		17
GO:0010529	negative regulation of transposition	19		8	42.1053	5.33	0.13522	2742		0.13522	1189		5	26.3158	3.62	0.28759	3458		0.28759	1890		2	10.5263	0.62	0.12744	1330		0.12744	477		2	10.5263	0.32	0.04081	618		0.04081	154		8	42.1053	5.41	0.14413	2819		0.14413	1355		7
GO:0009314	response to radiation	363		90	24.7934	101.9	0.93056	7132		0.1353	1190		56	15.427	69.09	0.96983	7256		0.36763	2388		6	1.65289	11.91	0.98125	4600		0.41878	1389		7	1.92837	6.18	0.42338	2438		1	1976		91	25.0689	103.34	0.93647	7242		0.14355	1345		88
GO:0043001	Golgi to plasma membrane protein transport	32		12	37.5	8.98	0.16037	2900		0.13537	1191		10	31.25	6.09	0.06798	2071		0.1832	1368		4	12.5	1.05	0.01989	664		0.01989	161		2	6.25	0.54	0.10267	983		0.10267	343		14	43.75	9.11	0.04638	1934		0.07041	789		11
GO:0051402	neuron apoptotic process	177		54	30.5085	49.69	0.25823	3475		0.13556	1192		46	25.9887	33.69	0.01359	1342		0.40673	2541		5	2.82486	5.81	0.69458	3808		0.55226	1655		4	2.25989	3.01	0.3559	2181		1	1977		56	31.6384	50.39	0.19473	3098		0.27107	1898		54
GO:0010821	regulation of mitochondrion organization	167		77	46.1078	46.88	4.6e-07	296		0.13577	1193		55	32.9341	31.78	1.2e-05	399		0.64817	3383		7	4.19162	5.48	0.30894	2429		1	3834		3	1.79641	2.84	0.54387	2781		1	1978		75	44.9102	47.54	3.9e-06	360		0.14085	1219		78
GO:1902895	positive regulation of pri-miRNA transcription by RNA polymerase II	22		9	40.9091	6.18	0.13584	2757		0.13584	1194		5	22.7273	4.19	0.41103	4167		0.41103	2576		1	4.54545	0.72	0.52035	3243		0.52035	1578		1	4.54545	0.37	0.31487	2013		0.31487	864		8	36.3636	6.26	0.27215	3515		0.27215	1899		7
GO:0002695	negative regulation of leukocyte activation	140		62	44.2857	39.3	2.8e-05	478		0.13648	1195		45	32.1429	26.65	0.00014	564		0.649	3418		11	7.85714	4.59	0.0064	442		0.3481	1225		6	4.28571	2.38	0.03256	548		1	1979		58	41.4286	39.85	0.00064	744		0.14176	1226		58
GO:0010959	regulation of metal ion transport	260		91	35	72.99	0.00822	1313		0.13691	1196		69	26.5385	49.48	0.00172	876		0.24007	1647		13	5	8.53	0.08721	1162		0.15243	512		12	4.61538	4.43	0.00168	193		1	1980		90	34.6154	74.02	0.01703	1452		0.14195	1227		91
GO:0016358	dendrite development	184		48	26.087	51.65	0.75175	5883		0.13705	1197		34	18.4783	35.02	0.60634	4904		0.23007	1581		6	3.26087	6.04	0.56441	3384		0.1625	618		4	2.17391	3.13	0.383	2299		0.31458	861		47	25.5435	52.38	0.83321	6497		0.14701	1363		43
GO:0032649	regulation of interferon-gamma production	80		38	47.5	22.46	0.00017	622		0.13717	1198		33	41.25	15.23	3.5e-06	349		0.04986	623		9	11.25	2.63	0.0012	304		1	2339		6	7.5	1.36	0.0024	217		0.00272	39		36	45	22.77	0.00116	842		0.43799	2723		36
GO:0042129	regulation of T cell proliferation	135		52	38.5185	37.9	0.00534	1149		0.1373	1199		43	31.8519	25.69	0.00024	611		0.04988	624		10	7.40741	4.43	0.01346	559		0.15207	511		7	5.18519	2.3	0.00832	341		0.08092	212		53	39.2593	38.43	0.00428	1055		0.02503	492		50
GO:0043620	regulation of DNA-templated transcription in response to stress	69		31	44.9275	19.37	0.00201	931		0.13754	1200		18	26.087	13.13	0.09293	2316		0.65128	3438		4	5.7971	2.26	0.19053	1712		1	3861		2	2.89855	1.17	0.32898	2085		1	1981		29	42.029	19.64	0.01068	1318		0.43862	2726		28
GO:0070231	T cell apoptotic process	44		22	50	12.35	0.00166	892		0.13773	1201		18	40.9091	8.37	0.00065	721		0.05031	628		3	6.81818	1.44	0.17464	1561		0.37265	1275		3	6.81818	0.75	0.03869	609		1	1982		19	43.1818	12.53	0.02587	1695		0.14289	1236		22
GO:0015986	ATP synthesis coupled proton transport	22		15	68.1818	6.18	0.00011	585		0.13781	1202		14	63.6364	4.19	5.4e-06	363		0.00549	235		0	0	0.72	1	5567		1	2196		1	4.54545	0.37	0.31487	2034		1	1983		16	72.7273	6.26	2.1e-05	458		0.02515	493		12
GO:0022898	regulation of transmembrane transporter activity	171		56	32.7485	48	0.10077	2465		0.13788	1203		39	22.807	32.55	0.12267	2489		0.24216	1658		4	2.33918	5.61	0.81717	4157		1	2835		5	2.92398	2.91	0.1674	1349		1	1984		54	31.5789	48.68	0.20434	3125		0.43927	2735		56
GO:0070828	heterochromatin organization	51		21	41.1765	14.32	0.02988	1803		0.13801	1204		11	21.5686	9.71	0.37562	3959		1	5664		1	1.96078	1.67	0.81825	4160		1	5415		0	0	0.87	1	7053		1	1985		21	41.1765	14.52	0.03458	1821		0.14289	1237		21
GO:0042119	neutrophil activation	476		311	65.3361	133.63	< 1e-30	9		0.13802	1205		225	47.2689	90.59	< 1e-30	21		0.43533	2593		25	5.2521	15.62	0.01407	567		0.25467	937		17	3.57143	8.11	0.00323	238		0.009	76		316	66.3866	135.51	< 1e-30	6		0.14375	1351		303
GO:0010874	regulation of cholesterol efflux	17		11	64.7059	4.77	0.00178	904		0.13806	1206		7	41.1765	3.24	0.02927	1672		0.05063	633		0	0	0.56	1	5446		1	2342		2	11.7647	0.29	0.03318	555		1	1986		11	64.7059	4.84	0.00202	905		0.14292	1239		11
GO:0000423	mitophagy	20		11	55	5.61	0.01013	1369		0.13814	1207		7	35	3.81	0.06929	2078		0.05066	635		0	0	0.66	1	4764		1	2344		0	0	0.34	1	3790		1	1987		10	50	5.69	0.03392	1813		0.1431	1243		11
GO:0050871	positive regulation of B cell activation	70		25	35.7143	19.65	0.09981	2462		0.13814	1208		15	21.4286	13.32	0.34965	3846		0.65181	3457		2	2.85714	2.3	0.6743	3748		1	3877		0	0	1.19	1	6486		1	1988		28	40	19.93	0.02468	1645		0.14274	1235		23
GO:0046456	icosanoid biosynthetic process	35		15	42.8571	9.83	0.04294	1953		0.13816	1209		10	28.5714	6.66	0.11339	2455		0.24266	1670		1	2.85714	1.15	0.68946	3785		0.68946	1841		2	5.71429	0.6	0.11923	1079		1	1989		15	42.8571	9.96	0.04813	1996		0.14303	1242		15
GO:0009914	hormone transport	229		69	30.131	64.29	0.26388	3493		0.13819	1210		43	18.7773	43.58	0.56658	4745		0.24328	1812		7	3.05677	7.52	0.62921	3604		1	2929		3	1.31004	3.9	0.75189	3237		1	1990		69	30.131	65.19	0.30972	3639		0.14314	1244		63
GO:1900225	regulation of NLRP3 inflammasome complex assembly	11		7	63.6364	3.09	0.0148	1489		0.13828	1211		8	72.7273	2.09	0.00016	575		0.00553	239		2	18.1818	0.36	0.04858	929		0.15341	520		1	9.09091	0.19	0.17221	1381		0.17221	565		6	54.5455	3.13	0.06204	2165		0.43967	2748		7
GO:0001783	B cell apoptotic process	22		10	45.4545	6.18	0.06158	2200		0.13828	1212		9	40.9091	4.19	0.01464	1391		0.24243	1663		2	9.09091	0.72	0.1617	1524		1	2839		1	4.54545	0.37	0.31487	2024		0.31487	865		10	45.4545	6.26	0.06704	2212		0.14316	1245		10
GO:0070242	thymocyte apoptotic process	16		8	50	4.49	0.05201	2066		0.13831	1213		7	43.75	3.05	0.02052	1504		0.05062	631		0	0	0.53	1	7270		1	2341		1	6.25	0.27	0.24039	1702		0.24039	726		7	43.75	4.55	0.14109	2697		0.14328	1248		8
GO:0060544	regulation of necroptotic process	16		8	50	4.49	0.05201	2067		0.13831	1214		5	31.25	3.05	0.1735	2809		0.24287	1674		0	0	0.53	1	7117		1	2845		1	6.25	0.27	0.24039	1708		0.24039	727		10	62.5	4.55	0.00469	1079		0.14299	1241		8
GO:0032225	regulation of synaptic transmission, dopaminergic	10		6	60	2.81	0.03457	1867		0.13834	1215		4	40	1.9	0.10437	2374		0.65174	3452		0	0	0.33	1	5903		1	3873		0	0	0.17	1	5309		1	1991		6	60	2.85	0.03694	1854		0.14321	1246		5
GO:0033622	integrin activation	14		7	50	3.93	0.06802	2253		0.13836	1216		4	28.5714	2.66	0.26891	3405		0.65187	3459		2	14.2857	0.46	0.07538	1087		1	3878		0	0	0.24	1	5490		1	1992		6	42.8571	3.99	0.1823	3045		0.43981	2753		7
GO:0010561	negative regulation of glycoprotein biosynthetic process	11		6	54.5455	3.09	0.05829	2172		0.13837	1217		5	45.4545	2.09	0.04153	1799		0.00555	248		0	0	0.36	1	5389		1	2201		1	9.09091	0.19	0.17221	1367		0.17221	566		5	45.4545	3.13	0.17775	2971		0.14334	1255		6
GO:0090085	regulation of protein deubiquitination	12		6	50	3.37	0.08958	2413		0.1384	1218		5	41.6667	2.28	0.06031	2012		0.05069	637		0	0	0.39	1	7556		1	2345		0	0	0.2	1	7367		1	1993		6	50	3.42	0.09496	2403		0.14327	1247		6
GO:0051900	regulation of mitochondrial depolarization	17		7	41.1765	4.77	0.17375	3072		0.13843	1219		8	47.0588	3.24	0.00801	1189		0.24243	1665		3	17.6471	0.56	0.01694	627		0.15314	517		1	5.88235	0.29	0.25334	1787		1	1994		7	41.1765	4.84	0.18365	3065		0.14331	1251		6
GO:0002902	regulation of B cell apoptotic process	17		7	41.1765	4.77	0.17375	3073		0.13843	1220		7	41.1765	3.24	0.02927	1671		0.05063	632		2	11.7647	0.56	0.10571	1242		0.15348	525		0	0	0.29	1	4052		1	1995		7	41.1765	4.84	0.18365	3066		0.14331	1252		7
GO:0043619	regulation of transcription from RNA polymerase II promoter in response to oxidative stress	10		5	50	2.81	0.11912	2629		0.13844	1221		3	30	1.9	0.29315	3538		0.65191	3463		1	10	0.33	0.2838	2293		1	3880		0	0	0.17	1	5987		1	1996		6	60	2.85	0.03694	1836		0.02532	497		6
GO:0060253	negative regulation of glial cell proliferation	10		5	50	2.81	0.11912	2630		0.13844	1222		3	30	1.9	0.29315	3490		0.24301	1681		1	10	0.33	0.2838	2302		1	2850		0	0	0.17	1	6740		1	1997		4	40	2.85	0.30997	3674		0.43995	2758		4
GO:0051152	positive regulation of smooth muscle cell differentiation	10		5	50	2.81	0.11912	2631		0.13844	1223		3	30	1.9	0.29315	3495		0.24301	1686		0	0	0.33	1	6891		1	2853		1	10	0.17	0.15786	1298		0.15786	522		5	50	2.85	0.12516	2618		0.14331	1253		5
GO:0030157	pancreatic juice secretion	11		5	45.4545	3.09	0.16982	2995		0.13846	1224		3	27.2727	2.09	0.35048	3894		1	7454		0	0	0.36	1	5757		1	7034		1	9.09091	0.19	0.17221	1407		1	1998		5	45.4545	3.13	0.17775	2972		0.14334	1256		4
GO:0035813	regulation of renal sodium excretion	12		5	41.6667	3.37	0.22713	3328		0.13849	1225		3	25	2.28	0.40721	4111		0.65197	3469		1	8.33333	0.39	0.33007	2521		1	3884		0	0	0.2	1	5693		1	1999		5	41.6667	3.42	0.23689	3410		0.14336	1265		5
GO:0008215	spermine metabolic process	5		3	60	1.4	0.13849	2766		0.13849	1226		2	40	0.95	0.24302	3168		0.24302	1690		1	20	0.16	0.15369	1466		0.15369	548		1	20	0.09	0.0823	841		0.0823	225		3	60	1.42	0.14336	2721		0.14336	1266		3
GO:0002457	T cell antigen processing and presentation	5		3	60	1.4	0.13849	2767		0.13849	1227		2	40	0.95	0.24302	3171		0.24302	1693		0	0	0.16	1	4889		1	2857		0	0	0.09	1	3981		1	2000		3	60	1.42	0.14336	2722		0.14336	1267		3
GO:0006570	tyrosine metabolic process	5		3	60	1.4	0.13849	2768		0.13849	1228		2	40	0.95	0.24302	3172		0.24302	1694		0	0	0.16	1	5131		1	2858		0	0	0.09	1	4309		1	2001		2	40	1.42	0.44004	4268		0.44004	2765		3
GO:0051583	dopamine uptake involved in synaptic transmission	5		3	60	1.4	0.13849	2769		0.13849	1229		2	40	0.95	0.24302	3175		0.24302	1697		0	0	0.16	1	6948		1	2861		0	0	0.09	1	6578		1	2002		2	40	1.42	0.44004	4272		0.44004	2766		2
GO:0090205	positive regulation of cholesterol metabolic process	5		3	60	1.4	0.13849	2770		0.13849	1230		1	20	0.95	0.65208	5092		0.65208	3493		0	0	0.16	1	7583		1	3899		0	0	0.09	1	7396		1	2003		3	60	1.42	0.14336	2723		0.14336	1268		3
GO:0033015	tetrapyrrole catabolic process	5		3	60	1.4	0.13849	2771		0.13849	1231		3	60	0.95	0.05072	1900		0.05072	640		0	0	0.16	1	6022		1	2348		1	20	0.09	0.0823	842		0.0823	226		3	60	1.42	0.14336	2724		0.14336	1269		3
GO:0018057	peptidyl-lysine oxidation	5		3	60	1.4	0.13849	2772		0.13849	1232		2	40	0.95	0.24302	3177		0.24302	1699		1	20	0.16	0.15369	1436		0.15369	549		0	0	0.09	1	4934		1	2004		2	40	1.42	0.44004	4274		0.44004	2767		3
GO:0006689	ganglioside catabolic process	5		3	60	1.4	0.13849	2773		0.13849	1233		3	60	0.95	0.05072	1901		0.05072	641		2	40	0.16	0.01006	521		0.01006	107		0	0	0.09	1	4342		1	2005		3	60	1.42	0.14336	2726		0.14336	1270		3
GO:1903972	regulation of cellular response to macrophage colony-stimulating factor stimulus	5		3	60	1.4	0.13849	2774		0.13849	1234		2	40	0.95	0.24302	3178		0.24302	1700		1	20	0.16	0.15369	1428		0.15369	550		NA	NA	NA	NA	NA		NA	7814		3	60	1.42	0.14336	2727		0.14336	1271		2
GO:1903936	cellular response to sodium arsenite	5		3	60	1.4	0.13849	2775		0.13849	1235		1	20	0.95	0.65208	5098		0.65208	3499		NA	NA	NA	NA	NA		NA	NA		NA	NA	NA	NA	NA		NA	7815		3	60	1.42	0.14336	2728		0.14336	1272		3
GO:0051666	actin cortical patch localization	5		3	60	1.4	0.13849	2776		0.13849	1236		2	40	0.95	0.24302	3179		0.24302	1701		0	0	0.16	1	6960		1	2863		0	0	0.09	1	6596		1	2006		2	40	1.42	0.44004	4279		0.44004	2768		3
GO:0097411	hypoxia-inducible factor-1alpha signaling pathway	5		3	60	1.4	0.13849	2777		0.13849	1237		2	40	0.95	0.24302	3181		0.24302	1703		1	20	0.16	0.15369	1456		0.15369	551		0	0	0.09	1	7501		1	2007		3	60	1.42	0.14336	2729		0.14336	1273		3
GO:0070221	sulfide oxidation, using sulfide:quinone oxidoreductase	5		3	60	1.4	0.13849	2778		0.13849	1238		3	60	0.95	0.05072	1902		0.05072	642		1	20	0.16	0.15369	1498		0.15369	533		0	0	0.09	1	6995		1	2008		3	60	1.42	0.14336	2730		0.14336	1274		3
GO:0070235	regulation of activation-induced cell death of T cells	5		3	60	1.4	0.13849	2779		0.13849	1239		2	40	0.95	0.24302	3183		0.24302	1705		0	0	0.16	1	7269		1	2865		1	20	0.09	0.0823	834		0.0823	227		2	40	1.42	0.44004	4282		0.44004	2769		2
GO:0046469	platelet activating factor metabolic process	5		3	60	1.4	0.13849	2780		0.13849	1240		3	60	0.95	0.05072	1903		0.05072	643		1	20	0.16	0.15369	1467		0.15369	534		0	0	0.09	1	6266		1	2009		3	60	1.42	0.14336	2731		0.14336	1275		3
GO:0046487	glyoxylate metabolic process	5		3	60	1.4	0.13849	2781		0.13849	1241		2	40	0.95	0.24302	3185		0.24302	1707		1	20	0.16	0.15369	1468		0.15369	552		0	0	0.09	1	6276		1	2010		1	20	1.42	0.81277	6231		0.81277	4664		3
GO:0008627	intrinsic apoptotic signaling pathway in response to osmotic stress	5		3	60	1.4	0.13849	2782		0.13849	1242		1	20	0.95	0.65208	5111		0.65208	3512		0	0	0.16	1	5287		1	3912		0	0	0.09	1	4508		1	2011		3	60	1.42	0.14336	2732		0.14336	1276		3
GO:0002583	regulation of antigen processing and presentation of peptide antigen	5		3	60	1.4	0.13849	2783		0.13849	1243		2	40	0.95	0.24302	3189		0.24302	1711		0	0	0.16	1	4901		1	2870		0	0	0.09	1	4001		1	2012		3	60	1.42	0.14336	2735		0.14336	1277		3
GO:0009217	purine deoxyribonucleoside triphosphate catabolic process	5		3	60	1.4	0.13849	2784		0.13849	1244		3	60	0.95	0.05072	1907		0.05072	647		1	20	0.16	0.15369	1496		0.15369	536		0	0	0.09	1	4567		1	2013		3	60	1.42	0.14336	2737		0.14336	1278		3
GO:0002606	positive regulation of dendritic cell antigen processing and presentation	5		3	60	1.4	0.13849	2785		0.13849	1245		2	40	0.95	0.24302	3193		0.24302	1715		0	0	0.16	1	4903		1	2871		0	0	0.09	1	4003		1	2014		3	60	1.42	0.14336	2740		0.14336	1279		3
GO:1902172	regulation of keratinocyte apoptotic process	5		3	60	1.4	0.13849	2786		0.13849	1246		2	40	0.95	0.24302	3194		0.24302	1716		NA	NA	NA	NA	NA		NA	NA		NA	NA	NA	NA	NA		NA	7816		3	60	1.42	0.14336	2741		0.14336	1280		3
GO:1990709	presynaptic active zone organization	5		3	60	1.4	0.13849	2787		0.13849	1247		NA	NA	NA	NA	NA		NA	NA		NA	NA	NA	NA	NA		NA	NA		NA	NA	NA	NA	NA		NA	7817		3	60	1.42	0.14336	2743		0.14336	1281		3
GO:0000147	actin cortical patch assembly	5		3	60	1.4	0.13849	2788		0.13849	1248		2	40	0.95	0.24302	3204		0.24302	1726		0	0	0.16	1	4747		1	2876		0	0	0.09	1	3759		1	2015		2	40	1.42	0.44004	4318		0.44004	2770		3
GO:1904177	regulation of adipose tissue development	5		3	60	1.4	0.13849	2789		0.13849	1249		3	60	0.95	0.05072	1911		0.05072	651		NA	NA	NA	NA	NA		NA	NA		NA	NA	NA	NA	NA		NA	7818		4	80	1.42	0.02534	1663		0.02534	520		3
GO:2000370	positive regulation of clathrin-dependent endocytosis	5		3	60	1.4	0.13849	2790		0.13849	1250		1	20	0.95	0.65208	5158		0.65208	3559		NA	NA	NA	NA	NA		NA	NA		NA	NA	NA	NA	NA		NA	7819		3	60	1.42	0.14336	2745		0.14336	1282		2
GO:2000347	positive regulation of hepatocyte proliferation	5		3	60	1.4	0.13849	2791		0.13849	1251		3	60	0.95	0.05072	1912		0.05072	652		1	20	0.16	0.15369	1454		0.15369	537		NA	NA	NA	NA	NA		NA	7820		4	80	1.42	0.02534	1664		0.02534	521		3
GO:1902525	regulation of protein monoubiquitination	5		3	60	1.4	0.13849	2792		0.13849	1252		1	20	0.95	0.65208	5164		0.65208	3565		NA	NA	NA	NA	NA		NA	NA		NA	NA	NA	NA	NA		NA	7821		4	80	1.42	0.02534	1665		0.02534	522		2
GO:0033625	positive regulation of integrin activation	5		3	60	1.4	0.13849	2793		0.13849	1253		2	40	0.95	0.24302	3208		0.24302	1730		2	40	0.16	0.01006	519		0.01006	112		0	0	0.09	1	5492		1	2016		3	60	1.42	0.14336	2748		0.14336	1283		3
GO:0000738	DNA catabolic process, exonucleolytic	5		3	60	1.4	0.13849	2794		0.13849	1254		2	40	0.95	0.24302	3209		0.24302	1731		0	0	0.16	1	4787		1	2879		1	20	0.09	0.0823	846		0.0823	228		3	60	1.42	0.14336	2750		0.14336	1284		3
GO:0071694	maintenance of protein location in extracellular region	5		3	60	1.4	0.13849	2795		0.13849	1255		NA	NA	NA	NA	NA		NA	8136		0	0	0.16	1	7423		1	7678		0	0	0.09	1	7188		1	2017		1	20	1.42	0.81277	6275		0.81277	4665		3
GO:0003062	regulation of heart rate by chemical signal	5		3	60	1.4	0.13849	2796		0.13849	1256		1	20	0.95	0.65208	5173		0.65208	3574		0	0	0.16	1	4937		1	3958		0	0	0.09	1	4063		1	2018		3	60	1.42	0.14336	2752		0.14336	1285		3
GO:0071671	regulation of smooth muscle cell chemotaxis	5		3	60	1.4	0.13849	2797		0.13849	1257		3	60	0.95	0.05072	1916		0.05072	656		0	0	0.16	1	7418		1	2354		0	0	0.09	1	7184		1	2019		3	60	1.42	0.14336	2755		0.14336	1286		3
GO:0007270	neuron-neuron synaptic transmission	5		3	60	1.4	0.13849	2798		0.13849	1258		3	60	0.95	0.05072	1917		0.05072	657		0	0	0.16	1	5236		1	2355		0	0	0.09	1	4452		1	2020		3	60	1.42	0.14336	2760		0.14336	1287		2
GO:2001033	negative regulation of double-strand break repair via nonhomologous end joining	5		3	60	1.4	0.13849	2799		0.13849	1259		NA	NA	NA	NA	NA		NA	NA		NA	NA	NA	NA	NA		NA	NA		NA	NA	NA	NA	NA		NA	7822		2	40	1.42	0.44004	4343		0.44004	2771		2
GO:0044828	negative regulation by host of viral genome replication	5		3	60	1.4	0.13849	2800		0.13849	1260		2	40	0.95	0.24302	3226		0.24302	1748		0	0	0.16	1	6523		1	2890		0	0	0.09	1	6059		1	2021		2	40	1.42	0.44004	4350		0.44004	2772		3
GO:0003330	regulation of extracellular matrix constituent secretion	5		3	60	1.4	0.13849	2801		0.13849	1261		2	40	0.95	0.24302	3228		0.24302	1750		0	0	0.16	1	4983		1	2891		0	0	0.09	1	4117		1	2022		3	60	1.42	0.14336	2761		0.14336	1288		2
GO:0044804	autophagy of nucleus	5		3	60	1.4	0.13849	2802		0.13849	1262		3	60	0.95	0.05072	1919		0.05072	659		0	0	0.16	1	6520		1	2356		0	0	0.09	1	6055		1	2023		3	60	1.42	0.14336	2762		0.14336	1289		3
GO:2000586	regulation of platelet-derived growth factor receptor-beta signaling pathway	5		3	60	1.4	0.13849	2803		0.13849	1263		1	20	0.95	0.65208	5199		0.65208	3600		NA	NA	NA	NA	NA		NA	NA		NA	NA	NA	NA	NA		NA	7823		3	60	1.42	0.14336	2764		0.14336	1290		2
GO:0045345	positive regulation of MHC class I biosynthetic process	5		3	60	1.4	0.13849	2804		0.13849	1264		1	20	0.95	0.65208	5200		0.65208	3601		0	0	0.16	1	6563		1	3976		0	0	0.09	1	6106		1	2024		3	60	1.42	0.14336	2765		0.14336	1291		2
GO:0019530	taurine metabolic process	5		3	60	1.4	0.13849	2805		0.13849	1265		2	40	0.95	0.24302	3233		0.24302	1755		0	0	0.16	1	5661		1	2893		0	0	0.09	1	4993		1	2025		3	60	1.42	0.14336	2766		0.14336	1292		3
GO:0044691	tooth eruption	5		3	60	1.4	0.13849	2806		0.13849	1266		1	20	0.95	0.65208	5207		0.65208	3608		2	40	0.16	0.01006	517		0.01006	117		0	0	0.09	1	6048		1	2026		3	60	1.42	0.14336	2768		0.14336	1293		3
GO:2000630	positive regulation of miRNA metabolic process	5		3	60	1.4	0.13849	2807		0.13849	1267		1	20	0.95	0.65208	5215		0.65208	3616		1	20	0.16	0.15369	1491		0.15369	592		NA	NA	NA	NA	NA		NA	7824		2	40	1.42	0.44004	4361		0.44004	2773		3
GO:0042940	D-amino acid transport	5		3	60	1.4	0.13849	2808		0.13849	1268		2	40	0.95	0.24302	3240		0.24302	1762		0	0	0.16	1	6401		1	2897		0	0	0.09	1	5908		1	2027		3	60	1.42	0.14336	2769		0.14336	1294		3
GO:0010728	regulation of hydrogen peroxide biosynthetic process	5		3	60	1.4	0.13849	2809		0.13849	1269		2	40	0.95	0.24302	3242		0.24302	1764		0	0	0.16	1	5419		1	2899		0	0	0.09	1	4703		1	2028		3	60	1.42	0.14336	2771		0.14336	1295		3
GO:0032429	regulation of phospholipase A2 activity	5		3	60	1.4	0.13849	2810		0.13849	1270		3	60	0.95	0.05072	1924		0.05072	664		1	20	0.16	0.15369	1446		0.15369	541		0	0	0.09	1	5354		1	2029		4	80	1.42	0.02534	1672		0.02534	523		4
GO:0060956	endocardial cell differentiation	5		3	60	1.4	0.13849	2811		0.13849	1271		2	40	0.95	0.24302	3244		0.24302	1766		1	20	0.16	0.15369	1448		0.15369	563		0	0	0.09	1	6862		1	2030		4	80	1.42	0.02534	1673		0.02534	524		2
GO:0010891	negative regulation of sequestering of triglyceride	5		3	60	1.4	0.13849	2812		0.13849	1272		1	20	0.95	0.65208	5226		0.65208	3627		0	0	0.16	1	5455		1	3993		0	0	0.09	1	4747		1	2031		3	60	1.42	0.14336	2772		0.14336	1296		3
GO:0015793	glycerol transport	5		3	60	1.4	0.13849	2813		0.13849	1273		2	40	0.95	0.24302	3246		0.24302	1768		0	0	0.16	1	5537		1	2902		0	0	0.09	1	4843		1	2032		3	60	1.42	0.14336	2773		0.14336	1297		2
GO:0032197	transposition, RNA-mediated	5		3	60	1.4	0.13849	2814		0.13849	1274		2	40	0.95	0.24302	3247		0.24302	1769		2	40	0.16	0.01006	514		0.01006	115		1	20	0.09	0.0823	800		0.0823	229		2	40	1.42	0.44004	4374		0.44004	2774		3
GO:0015760	glucose-6-phosphate transport	5		3	60	1.4	0.13849	2815		0.13849	1275		1	20	0.95	0.65208	5229		0.65208	3630		0	0	0.16	1	5534		1	3995		0	0	0.09	1	4840		1	2033		2	40	1.42	0.44004	4375		0.44004	2775		3
GO:0034354	'de novo' NAD biosynthetic process from tryptophan	5		3	60	1.4	0.13849	2816		0.13849	1276		3	60	0.95	0.05072	1925		0.05072	665		1	20	0.16	0.15369	1431		0.15369	542		0	0	0.09	1	5560		1	2034		3	60	1.42	0.14336	2775		0.14336	1298		3
GO:0014900	muscle hyperplasia	5		3	60	1.4	0.13849	2817		0.13849	1277		2	40	0.95	0.24302	3249		0.24302	1771		0	0	0.16	1	5518		1	2903		0	0	0.09	1	4824		1	2035		3	60	1.42	0.14336	2776		0.14336	1299		3
GO:0045794	negative regulation of cell volume	5		3	60	1.4	0.13849	2818		0.13849	1278		2	40	0.95	0.24302	3250		0.24302	1772		3	60	0.16	0.00033	231		0.00033	38		0	0	0.09	1	6171		1	2036		3	60	1.42	0.14336	2778		0.14336	1300		4
GO:0015853	adenine transport	5		3	60	1.4	0.13849	2819		0.13849	1279		3	60	0.95	0.05072	1926		0.05072	666		0	0	0.16	1	5551		1	2357		0	0	0.09	1	4856		1	2037		3	60	1.42	0.14336	2779		0.14336	1301		3
GO:0032226	positive regulation of synaptic transmission, dopaminergic	5		3	60	1.4	0.13849	2820		0.13849	1280		3	60	0.95	0.05072	1927		0.05072	667		0	0	0.16	1	5904		1	2358		0	0	0.09	1	5310		1	2038		3	60	1.42	0.14336	2780		0.14336	1302		3
GO:1903377	negative regulation of oxidative stress-induced neuron intrinsic apoptotic signaling pathway	5		3	60	1.4	0.13849	2821		0.13849	1281		2	40	0.95	0.24302	3255		0.24302	1777		NA	NA	NA	NA	NA		NA	NA		NA	NA	NA	NA	NA		NA	7825		3	60	1.42	0.14336	2782		0.14336	1303		3
GO:1901299	negative regulation of hydrogen peroxide-mediated programmed cell death	5		3	60	1.4	0.13849	2822		0.13849	1282		2	40	0.95	0.24302	3257		0.24302	1779		NA	NA	NA	NA	NA		NA	NA		0	0	0.09	1	7724		1	2039		3	60	1.42	0.14336	2783		0.14336	1304		3
GO:0015677	copper ion import	5		3	60	1.4	0.13849	2823		0.13849	1283		1	20	0.95	0.65208	5250		0.65208	3651		0	0	0.16	1	5524		1	4010		0	0	0.09	1	4829		1	2040		3	60	1.42	0.14336	2786		0.14336	1305		3
GO:0001957	intramembranous ossification	5		3	60	1.4	0.13849	2824		0.13849	1284		0	0	0.95	1	7706		1	7706		0	0	0.16	1	4845		1	7270		0	0	0.09	1	3900		1	2041		3	60	1.42	0.14336	2788		0.14336	1306		3
GO:0045650	negative regulation of macrophage differentiation	5		3	60	1.4	0.13849	2825		0.13849	1285		1	20	0.95	0.65208	5255		0.65208	3656		1	20	0.16	0.15369	1495		0.15369	601		1	20	0.09	0.0823	835		0.0823	230		3	60	1.42	0.14336	2789		0.14336	1307		1
GO:1903232	melanosome assembly	5		3	60	1.4	0.13849	2826		0.13849	1286		3	60	0.95	0.05072	1932		0.05072	672		NA	NA	NA	NA	NA		NA	NA		NA	NA	NA	NA	NA		NA	7826		3	60	1.42	0.14336	2790		0.14336	1308		2
GO:0032661	regulation of interleukin-18 production	5		3	60	1.4	0.13849	2827		0.13849	1287		1	20	0.95	0.65208	5261		0.65208	3662		1	20	0.16	0.15369	1478		0.15369	603		0	0	0.09	1	5382		1	2042		3	60	1.42	0.14336	2791		0.14336	1309		3
GO:0010985	negative regulation of lipoprotein particle clearance	5		3	60	1.4	0.13849	2828		0.13849	1288		2	40	0.95	0.24302	3267		0.24302	1789		0	0	0.16	1	5477		1	2914		0	0	0.09	1	4770		1	2043		3	60	1.42	0.14336	2792		0.14336	1310		3
GO:0051388	positive regulation of neurotrophin TRK receptor signaling pathway	5		3	60	1.4	0.13849	2829		0.13849	1289		1	20	0.95	0.65208	5263		0.65208	3664		0	0	0.16	1	6923		1	4018		0	0	0.09	1	6553		1	2044		3	60	1.42	0.14336	2793		0.14336	1311		3
GO:0043461	proton-transporting ATP synthase complex assembly	5		3	60	1.4	0.13849	2830		0.13849	1290		2	40	0.95	0.24302	3269		0.24302	1791		0	0	0.16	1	6439		1	2915		0	0	0.09	1	5958		1	2045		2	40	1.42	0.44004	4400		0.44004	2776		3
GO:0006477	protein sulfation	5		3	60	1.4	0.13849	2831		0.13849	1291		1	20	0.95	0.65208	5267		0.65208	3668		0	0	0.16	1	5094		1	4019		0	0	0.09	1	4271		1	2046		3	60	1.42	0.14336	2795		0.14336	1312		3
GO:0045964	positive regulation of dopamine metabolic process	5		3	60	1.4	0.13849	2832		0.13849	1292		1	20	0.95	0.65208	5276		0.65208	3677		0	0	0.16	1	6653		1	4025		0	0	0.09	1	6211		1	2047		2	40	1.42	0.44004	4406		0.44004	2777		3
GO:0006102	isocitrate metabolic process	5		3	60	1.4	0.13849	2833		0.13849	1293		3	60	0.95	0.05072	1933		0.05072	673		1	20	0.16	0.15369	1475		0.15369	544		0	0	0.09	1	4177		1	2048		1	20	1.42	0.81277	6349		0.81277	4666		3
GO:0090315	negative regulation of protein targeting to membrane	5		3	60	1.4	0.13849	2834		0.13849	1294		1	20	0.95	0.65208	5281		0.65208	3682		0	0	0.16	1	7609		1	4029		0	0	0.09	1	7420		1	2049		1	20	1.42	0.81277	6356		0.81277	4667		3
GO:0032960	regulation of inositol trisphosphate biosynthetic process	5		3	60	1.4	0.13849	2835		0.13849	1295		2	40	0.95	0.24302	3276		0.24302	1798		0	0	0.16	1	6008		1	2917		1	20	0.09	0.0823	827		0.0823	231		2	40	1.42	0.44004	4409		0.44004	2778		3
GO:0072656	maintenance of protein location in mitochondrion	5		3	60	1.4	0.13849	2836		0.13849	1296		2	40	0.95	0.24302	3280		0.24302	1802		0	0	0.16	1	7506		1	2919		0	0	0.09	1	7309		1	2050		3	60	1.42	0.14336	2798		0.14336	1313		4
GO:0006701	progesterone biosynthetic process	5		3	60	1.4	0.13849	2837		0.13849	1297		3	60	0.95	0.05072	1936		0.05072	676		1	20	0.16	0.15369	1485		0.15369	546		1	20	0.09	0.0823	830		0.0823	232		3	60	1.42	0.14336	2799		0.14336	1314		2
GO:1901020	negative regulation of calcium ion transmembrane transporter activity	23		8	34.7826	6.46	0.3052	3670		0.1385	1298		7	30.4348	4.38	0.13121	2530		0.65166	3445		1	4.34783	0.75	0.53612	3298		0.53612	1614		1	4.34783	0.39	0.32656	2071		1	2051		8	34.7826	6.55	0.32051	3770		0.14338	1339		8
GO:0014819	regulation of skeletal muscle contraction	10		4	40	2.81	0.29976	3610		0.13853	1299		2	20	1.9	0.59436	4851		0.65208	3480		1	10	0.33	0.2838	2256		0.2838	1070		1	10	0.17	0.15786	1322		1	2052		4	40	2.85	0.30997	3642		0.14341	1340		3
GO:0005979	regulation of glycogen biosynthetic process	24		7	29.1667	6.74	0.52948	4817		0.13862	1300		5	20.8333	4.57	0.49202	4450		0.24311	1806		0	0	0.79	1	5004		1	2923		0	0	0.41	1	4140		1	2053		6	25	6.83	0.71908	5849		0.44027	2940		9
GO:0061014	positive regulation of mRNA catabolic process	40		11	27.5	11.23	0.59173	5158		0.13867	1301		7	17.5	7.61	0.6605	5354		0.24328	1813		2	5	1.31	0.37965	2745		0.39382	1325		2	5	0.68	0.14813	1253		1	2054		10	25	11.39	0.74116	5890		0.14365	1348		11
GO:0006195	purine nucleotide catabolic process	35		9	25.7143	9.83	0.68335	5515		0.13872	1302		9	25.7143	6.66	0.20901	2972		0.05071	638		1	2.85714	1.15	0.68946	3793		1	2346		0	0	0.6	1	4200		1	2055		10	28.5714	9.96	0.55842	5052		0.14351	1344		8
GO:1901992	positive regulation of mitotic cell cycle phase transition	69		17	24.6377	19.37	0.77718	5998		0.13887	1303		9	13.0435	13.13	0.92864	6937		0.24383	1817		NA	NA	NA	NA	NA		NA	NA		1	1.44928	1.17	0.69523	3131		1	2056		19	27.5362	19.64	0.61326	5283		0.14358	1346		12
GO:0018393	internal peptidyl-lysine acetylation	144		30	20.8333	40.42	0.98158	7580		0.13965	1304		19	13.1944	27.41	0.97558	7312		0.24451	1822		1	0.694444	4.73	0.99203	4653		0.99203	2138		2	1.38889	2.45	0.70705	3160		0.0828	267		27	18.75	40.99	0.9974	7832		0.44242	2948		29
GO:0043627	response to estrogen	60		21	35	16.84	0.14649	2863		0.1416	1305		19	31.6667	11.42	0.0132	1335		0.05007	625		3	5	1.97	0.31474	2436		0.31474	1147		1	1.66667	1.02	0.64401	3028		0.64401	1205		21	35	17.08	0.16308	2883		0.15596	1370		20
GO:0007409	axonogenesis	342		105	30.7018	96.01	0.1503	2874		0.14393	1306		55	16.0819	65.09	0.93275	6967		0.27338	1876		9	2.63158	11.22	0.79533	4095		0.82539	1995		7	2.04678	5.82	0.3647	2226		0.18443	595		98	28.655	97.36	0.48987	4589		0.25094	1878		99
GO:0030433	ubiquitin-dependent ERAD pathway	69		26	37.6812	19.37	0.05268	2078		0.14572	1307		17	24.6377	13.13	0.15034	2715		0.24021	1648		4	5.7971	2.26	0.19053	1710		0.58838	1705		1	1.44928	1.17	0.69523	3129		0.69523	1240		29	42.029	19.64	0.01068	1317		0.06234	775		26
GO:0070301	cellular response to hydrogen peroxide	81		30	37.037	22.74	0.04946	2041		0.1498	1308		17	20.9877	15.42	0.36932	3924		0.93521	4936		3	3.7037	2.66	0.4993	3161		0.85053	2011		1	1.23457	1.38	0.75229	3239		0.75229	1272		29	35.8025	23.06	0.0914	2363		0.24692	1875		28
GO:0032436	positive regulation of proteasomal ubiquitin-dependent protein catabolic process	77		29	37.6623	21.62	0.04273	1951		0.15133	1309		23	29.8701	14.66	0.01441	1387		0.03397	516		5	6.49351	2.53	0.10848	1265		0.40212	1353		0	0	1.31	1	5357		1	2057		30	38.961	21.92	0.03	1774		0.16929	1429		28
GO:0007059	chromosome segregation	281		57	20.2847	78.88	0.99902	7821		0.1525	1310		34	12.0996	53.48	0.99938	7590		0.76563	4138		4	1.42349	9.22	0.98399	4614		0.78165	1958		2	0.711744	4.78	0.95457	3630		1	2058		74	26.3345	79.99	0.80666	6174		0.00027	77		53
GO:0045600	positive regulation of fat cell differentiation	46		17	36.9565	12.91	0.12063	2648		0.15273	1311		17	36.9565	8.75	0.00334	990		0.00763	267		3	6.52174	1.51	0.19122	1718		0.19122	750		1	2.17391	0.78	0.5468	2785		0.5468	1124		18	39.1304	13.1	0.07753	2273		0.09485	1005		17
GO:0042307	positive regulation of protein import into nucleus	38		14	36.8421	10.67	0.15293	2879		0.15293	1312		10	26.3158	7.23	0.17222	2797		0.17222	1262		1	2.63158	1.25	0.71912	3877		0.71912	1882		0	0	0.65	1	5835		1	2059		12	31.5789	10.82	0.39377	4036		0.39377	2569		13
GO:0043069	negative regulation of programmed cell death	721		259	35.9223	202.4	1.4e-06	336		0.15318	1313		185	25.6588	137.22	4.1e-06	354		0.4563	2624		24	3.32871	23.66	0.5019	3165		1	3359		19	2.63523	12.28	0.03894	613		1	2060		258	35.7836	205.25	6.8e-06	391		0.16016	1373		252
GO:0030198	extracellular matrix organization	244		92	37.7049	68.5	0.00063	767		0.15421	1314		55	22.541	46.44	0.09407	2317		0.70063	3819		7	2.86885	8.01	0.69395	3806		0.9401	2096		4	1.63934	4.15	0.60009	2918		0.79294	1289		91	37.2951	69.46	0.00161	873		0.17945	1468		90
GO:0014070	response to organic cyclic compound	719		235	32.6843	201.84	0.00294	1029		0.15653	1315		176	24.4784	136.84	0.00012	546		0.02795	477		30	4.17246	23.6	0.10442	1230		0.17891	637		20	2.78164	12.24	0.02106	491		0.74269	1263		241	33.5188	204.68	0.00133	850		0.11197	1127		229
GO:0002931	response to ischemia	35		13	37.1429	9.83	0.15668	2891		0.15668	1316		11	31.4286	6.66	0.05502	1973		0.05502	686		1	2.85714	1.15	0.68946	3787		0.68946	1840		2	5.71429	0.6	0.11923	1075		0.11923	399		14	40	9.96	0.09494	2389		0.09494	1008		11
GO:0007257	activation of JUN kinase activity	35		13	37.1429	9.83	0.15668	2892		0.15668	1317		8	22.8571	6.66	0.3447	3830		0.3447	2312		4	11.4286	1.15	0.02683	765		0.02683	203		0	0	0.6	1	4451		1	2061		12	34.2857	9.96	0.27642	3522		0.27642	1903		13
GO:0006986	response to unfolded protein	156		59	37.8205	43.79	0.00504	1133		0.15735	1318		42	26.9231	29.69	0.00966	1265		0.13701	1100		13	8.33333	5.12	0.00189	331		0.08362	363		7	4.48718	2.66	0.01739	459		0.1004	336		66	42.3077	44.41	0.00014	596		0.09148	991		55
GO:0034446	substrate adhesion-dependent cell spreading	75		29	38.6667	21.05	0.03017	1807		0.15915	1319		15	20	14.27	0.46149	4276		0.25412	1839		5	6.66667	2.46	0.09975	1216		0.08614	372		3	4	1.28	0.13573	1165		0.13573	450		26	34.6667	21.35	0.14385	2816		0.42695	2691		29
GO:0042775	mitochondrial ATP synthesis coupled electron transport	81		35	43.2099	22.74	0.00243	975		0.15919	1320		38	46.9136	15.42	1e-08	189		0.04649	592		0	0	2.66	1	6391		1	2323		1	1.23457	1.38	0.75229	3241		1	2062		41	50.6173	23.06	2e-05	455		0.16503	1376		32
GO:0030212	hyaluronan metabolic process	32		18	56.25	8.98	0.00075	786		0.15961	1321		9	28.125	6.09	0.13949	2619		0.46742	2703		2	6.25	1.05	0.28297	2224		0.43273	1398		1	3.125	0.54	0.42319	2436		1	2063		20	62.5	9.11	6.2e-05	537		0.16596	1378		20
GO:0036003	positive regulation of transcription from RNA polymerase II promoter in response to stress	26		15	57.6923	7.3	0.00145	873		0.15978	1322		8	30.7692	4.95	0.10489	2390		0.81488	4378		2	7.69231	0.85	0.20946	1851		1	4474		1	3.84615	0.44	0.36044	2204		1	2064		14	53.8462	7.4	0.00565	1123		0.40803	2590		14
GO:1901264	carbohydrate derivative transport	59		24	40.678	16.56	0.02476	1740		0.15982	1323		14	23.7288	11.23	0.22076	3019		0.93548	4937		2	3.38983	1.94	0.58141	3466		1	4824		1	1.69492	1	0.63781	3022		1	2065		26	44.0678	16.8	0.00745	1189		0.04647	614		22
GO:0048246	macrophage chemotaxis	27		14	51.8519	7.58	0.00761	1255		0.15995	1324		14	51.8519	5.14	0.00013	554		0.04737	593		4	14.8148	0.89	0.01103	528		0.02623	188		3	11.1111	0.46	0.01054	374		0.12749	404		14	51.8519	7.69	0.0087	1277		0.16656	1379		14
GO:0045124	regulation of bone resorption	28		14	50	7.86	0.01135	1397		0.15998	1325		6	21.4286	5.33	0.44736	4221		0.81522	4384		1	3.57143	0.92	0.60753	3543		1	4478		0	0	0.48	1	6085		1	2066		12	42.8571	7.97	0.0731	2247		0.40854	2601		14
GO:2000008	regulation of protein localization to cell surface	31		14	45.1613	8.7	0.03123	1825		0.16009	1326		11	35.4839	5.9	0.02316	1534		0.46691	2692		1	3.22581	1.02	0.645	3659		1	3400		NA	NA	NA	NA	NA		NA	7827		15	48.3871	8.82	0.01463	1404		0.16658	1380		14
GO:0002726	positive regulation of T cell cytokine production	18		10	55.5556	5.05	0.01292	1446		0.16014	1327		7	38.8889	3.43	0.04022	1788		0.46727	2699		1	5.55556	0.59	0.45175	3013		1	3406		2	11.1111	0.31	0.03692	586		1	2067		9	50	5.12	0.04354	1920		0.16688	1383		10
GO:0060561	apoptotic process involved in morphogenesis	16		9	56.25	4.49	0.0165	1527		0.16019	1328		8	50	3.05	0.00508	1073		0.04762	598		0	0	0.53	1	7122		1	2325		1	6.25	0.27	0.24039	1706		0.24039	728		9	56.25	4.55	0.01812	1480		0.1668	1381		8
GO:0045063	T-helper 1 cell differentiation	17		9	52.9412	4.77	0.02646	1756		0.16023	1329		8	47.0588	3.24	0.00801	1188		0.18159	1311		2	11.7647	0.56	0.10571	1248		1	2632		1	5.88235	0.29	0.25334	1777		1	2068		9	52.9412	4.84	0.02893	1729		0.16684	1382		9
GO:0051127	positive regulation of actin nucleation	15		8	53.3333	4.21	0.03426	1845		0.16029	1330		6	40	2.85	0.04929	1882		0.18185	1316		0	0	0.49	1	6885		1	2634		0	0	0.26	1	6526		1	2069		7	46.6667	4.27	0.10391	2437		0.40879	2606		8
GO:0048265	response to pain	15		7	46.6667	4.21	0.09756	2446		0.16041	1331		7	46.6667	2.85	0.01376	1354		0.18169	1312		2	13.3333	0.49	0.08515	1142		0.08515	368		1	6.66667	0.26	0.22722	1663		1	2070		7	46.6667	4.27	0.10391	2430		0.16703	1386		6
GO:0030262	apoptotic nuclear changes	30		11	36.6667	8.42	0.19657	3125		0.16044	1332		5	16.6667	5.71	0.70113	5497		0.81541	4476		0	0	0.98	1	5770		1	4540		0	0	0.51	1	5121		1	2071		12	40	8.54	0.11707	2584		0.04677	620		11
GO:0032233	positive regulation of actin filament bundle assembly	55		18	32.7273	15.44	0.26353	3490		0.16044	1333		15	27.2727	10.47	0.08652	2231		0.46704	2694		3	5.45455	1.8	0.26967	2177		0.23411	864		0	0	0.94	1	5315		1	2072		17	30.9091	15.66	0.39277	4035		0.16721	1418		18
GO:0009068	aspartate family amino acid catabolic process	16		7	43.75	4.49	0.13298	2721		0.16045	1334		4	25	3.05	0.36318	3901		0.18221	1360		0	0	0.53	1	5292		1	2656		1	6.25	0.27	0.24039	1695		0.24039	729		6	37.5	4.55	0.29064	3573		0.40905	2608		7
GO:0099527	postsynapse to nucleus signaling pathway	8		4	50	2.25	0.16055	2902		0.16055	1335		2	25	1.52	0.46799	4326		0.46799	2722		1	12.5	0.26	0.23434	1945		0.23434	891		0	0	0.14	1	7586		1	2073		3	37.5	2.28	0.40919	4083		0.40919	2615		4
GO:0046085	adenosine metabolic process	8		4	50	2.25	0.16055	2903		0.16055	1336		2	25	1.52	0.46799	4328		0.46799	2724		2	25	0.26	0.02639	746		0.02639	197		0	0	0.14	1	6231		1	2074		4	50	2.28	0.16716	2893		0.16716	1392		4
GO:0043653	mitochondrial fragmentation involved in apoptotic process	8		4	50	2.25	0.16055	2904		0.16055	1337		4	50	1.52	0.04778	1852		0.04778	602		0	0	0.26	1	6466		1	2328		0	0	0.14	1	5995		1	2075		4	50	2.28	0.16716	2894		0.16716	1393		4
GO:0043615	astrocyte cell migration	8		4	50	2.25	0.16055	2905		0.16055	1338		5	62.5	1.52	0.00834	1204		0.00834	278		3	37.5	0.26	0.00174	325		0.00174	56		1	12.5	0.14	0.12841	1114		0.12841	418		3	37.5	2.28	0.40919	4088		0.40919	2616		4
GO:1902004	positive regulation of amyloid-beta formation	8		4	50	2.25	0.16055	2906		0.16055	1339		3	37.5	1.52	0.18212	2857		0.18212	1322		NA	NA	NA	NA	NA		NA	NA		NA	NA	NA	NA	NA		NA	7828		4	50	2.28	0.16716	2897		0.16716	1394		4
GO:0006957	complement activation, alternative pathway	8		4	50	2.25	0.16055	2907		0.16055	1340		5	62.5	1.52	0.00834	1205		0.00834	279		1	12.5	0.26	0.23434	1939		0.23434	870		0	0	0.14	1	4386		1	2076		5	62.5	2.28	0.0468	1940		0.0468	632		4
GO:0046185	aldehyde catabolic process	8		4	50	2.25	0.16055	2908		0.16055	1341		1	12.5	1.52	0.81539	6160		0.81539	4400		0	0	0.26	1	6672		1	4490		0	0	0.14	1	6242		1	2077		3	37.5	2.28	0.40919	4093		0.40919	2617		4
GO:0071493	cellular response to UV-B	8		4	50	2.25	0.16055	2909		0.16055	1342		2	25	1.52	0.46799	4340		0.46799	2736		0	0	0.26	1	7398		1	3422		0	0	0.14	1	7164		1	2078		5	62.5	2.28	0.0468	1941		0.0468	633		4
GO:0002674	negative regulation of acute inflammatory response	8		4	50	2.25	0.16055	2910		0.16055	1343		3	37.5	1.52	0.18212	2860		0.18212	1325		0	0	0.26	1	4908		1	2639		0	0	0.14	1	4013		1	2079		5	62.5	2.28	0.0468	1943		0.0468	634		4
GO:0071447	cellular response to hydroperoxide	8		4	50	2.25	0.16055	2911		0.16055	1344		4	50	1.52	0.04778	1856		0.04778	606		0	0	0.26	1	7390		1	2330		0	0	0.14	1	7155		1	2080		4	50	2.28	0.16716	2899		0.16716	1395		4
GO:1902260	negative regulation of delayed rectifier potassium channel activity	8		4	50	2.25	0.16055	2912		0.16055	1345		3	37.5	1.52	0.18212	2862		0.18212	1327		NA	NA	NA	NA	NA		NA	NA		NA	NA	NA	NA	NA		NA	7829		4	50	2.28	0.16716	2900		0.16716	1396		4
GO:0016559	peroxisome fission	8		4	50	2.25	0.16055	2913		0.16055	1346		6	75	1.52	0.00093	759		0.00093	116		0	0	0.26	1	5593		1	2168		0	0	0.14	1	4911		1	2081		3	37.5	2.28	0.40919	4099		0.40919	2618		4
GO:0048251	elastic fiber assembly	8		4	50	2.25	0.16055	2914		0.16055	1347		2	25	1.52	0.46799	4345		0.46799	2741		0	0	0.26	1	6748		1	3426		0	0	0.14	1	6357		1	2082		3	37.5	2.28	0.40919	4101		0.40919	2619		4
GO:0060339	negative regulation of type I interferon-mediated signaling pathway	8		4	50	2.25	0.16055	2915		0.16055	1348		3	37.5	1.52	0.18212	2864		0.18212	1329		1	12.5	0.26	0.23434	1984		0.23434	880		0	0	0.14	1	6758		1	2083		4	50	2.28	0.16716	2901		0.16716	1397		3
GO:0060456	positive regulation of digestive system process	8		4	50	2.25	0.16055	2916		0.16055	1349		3	37.5	1.52	0.18212	2865		0.18212	1330		0	0	0.26	1	7108		1	2642		0	0	0.14	1	6795		1	2084		4	50	2.28	0.16716	2902		0.16716	1398		3
GO:0046689	response to mercury ion	8		4	50	2.25	0.16055	2917		0.16055	1350		3	37.5	1.52	0.18212	2866		0.18212	1331		0	0	0.26	1	6705		1	2643		0	0	0.14	1	6302		1	2085		4	50	2.28	0.16716	2903		0.16716	1399		3
GO:0042117	monocyte activation	8		4	50	2.25	0.16055	2918		0.16055	1351		2	25	1.52	0.46799	4347		0.46799	2743		1	12.5	0.26	0.23434	1955		0.23434	899		0	0	0.14	1	5816		1	2086		4	50	2.28	0.16716	2904		0.16716	1400		4
GO:0042271	susceptibility to natural killer cell mediated cytotoxicity	8		4	50	2.25	0.16055	2919		0.16055	1352		1	12.5	1.52	0.81539	6179		0.81539	4419		1	12.5	0.26	0.23434	1958		0.23434	917		0	0	0.14	1	5828		1	2087		3	37.5	2.28	0.40919	4107		0.40919	2620		4
GO:0033601	positive regulation of mammary gland epithelial cell proliferation	8		4	50	2.25	0.16055	2920		0.16055	1353		NA	NA	NA	NA	NA		NA	7763		1	12.5	0.26	0.23434	1975		0.23434	928		0	0	0.14	1	5487		1	2088		3	37.5	2.28	0.40919	4109		0.40919	2621		3
GO:0061042	vascular wound healing	8		4	50	2.25	0.16055	2921		0.16055	1354		3	37.5	1.52	0.18212	2870		0.18212	1335		1	12.5	0.26	0.23434	1942		0.23434	882		0	0	0.14	1	6886		1	2089		5	62.5	2.28	0.0468	1948		0.0468	635		4
GO:0007172	signal complex assembly	8		4	50	2.25	0.16055	2922		0.16055	1355		4	50	1.52	0.04778	1860		0.04778	610		0	0	0.26	1	5221		1	2333		0	0	0.14	1	4429		1	2090		4	50	2.28	0.16716	2906		0.16716	1401		4
GO:2000121	regulation of removal of superoxide radicals	8		4	50	2.25	0.16055	2923		0.16055	1356		5	62.5	1.52	0.00834	1210		0.00834	284		2	25	0.26	0.02639	749		0.02639	192		NA	NA	NA	NA	NA		NA	7830		5	62.5	2.28	0.0468	1949		0.0468	636		4
GO:0036462	TRAIL-activated apoptotic signaling pathway	8		4	50	2.25	0.16055	2924		0.16055	1357		5	62.5	1.52	0.00834	1211		0.00834	285		1	12.5	0.26	0.23434	1968		0.23434	873		1	12.5	0.14	0.12841	1111		0.12841	419		4	50	2.28	0.16716	2907		0.16716	1402		4
GO:1900451	positive regulation of glutamate receptor signaling pathway	8		4	50	2.25	0.16055	2925		0.16055	1358		2	25	1.52	0.46799	4354		0.46799	2750		NA	NA	NA	NA	NA		NA	NA		1	12.5	0.14	0.12841	1112		0.12841	420		2	25	2.28	0.71327	5767		0.71327	4202		5
GO:1905461	positive regulation of vascular associated smooth muscle cell apoptotic process	8		4	50	2.25	0.16055	2926		0.16055	1359		3	37.5	1.52	0.18212	2872		0.18212	1337		NA	NA	NA	NA	NA		NA	NA		NA	NA	NA	NA	NA		NA	7831		4	50	2.28	0.16716	2909		0.16716	1403		4
GO:0036149	phosphatidylinositol acyl-chain remodeling	8		4	50	2.25	0.16055	2927		0.16055	1360		5	62.5	1.52	0.00834	1212		0.00834	286		1	12.5	0.26	0.23434	1978		0.23434	874		0	0	0.14	1	5737		1	2091		5	62.5	2.28	0.0468	1952		0.0468	637		4
GO:0061314	Notch signaling involved in heart development	8		4	50	2.25	0.16055	2928		0.16055	1361		1	12.5	1.52	0.81539	6196		0.81539	4436		0	0	0.26	1	7204		1	4510		0	0	0.14	1	6913		1	2092		4	50	2.28	0.16716	2910		0.16716	1404		3
GO:0036289	peptidyl-serine autophosphorylation	8		4	50	2.25	0.16055	2929		0.16055	1362		4	50	1.52	0.04778	1861		0.04778	611		0	0	0.26	1	6270		1	2334		0	0	0.14	1	5748		1	2093		4	50	2.28	0.16716	2911		0.16716	1405		4
GO:0010269	response to selenium ion	8		4	50	2.25	0.16055	2930		0.16055	1363		4	50	1.52	0.04778	1862		0.04778	612		0	0	0.26	1	5375		1	2335		0	0	0.14	1	4637		1	2094		4	50	2.28	0.16716	2912		0.16716	1406		4
GO:1903012	positive regulation of bone development	8		4	50	2.25	0.16055	2931		0.16055	1364		1	12.5	1.52	0.81539	6204		0.81539	4444		NA	NA	NA	NA	NA		NA	NA		NA	NA	NA	NA	NA		NA	7832		4	50	2.28	0.16716	2913		0.16716	1407		4
GO:0006013	mannose metabolic process	8		4	50	2.25	0.16055	2932		0.16055	1365		0	0	1.52	1	7737		1	7737		0	0	0.26	1	5014		1	7301		0	0	0.14	1	4151		1	2095		3	37.5	2.28	0.40919	4124		0.40919	2622		4
GO:0034144	negative regulation of toll-like receptor 4 signaling pathway	8		4	50	2.25	0.16055	2933		0.16055	1366		3	37.5	1.52	0.18212	2884		0.18212	1349		2	25	0.26	0.02639	745		0.02639	194		0	0	0.14	1	5540		1	2096		4	50	2.28	0.16716	2918		0.16716	1408		4
GO:0010988	regulation of low-density lipoprotein particle clearance	8		4	50	2.25	0.16055	2934		0.16055	1367		2	25	1.52	0.46799	4375		0.46799	2771		0	0	0.26	1	5478		1	3443		0	0	0.14	1	4771		1	2097		3	37.5	2.28	0.40919	4129		0.40919	2623		4
GO:0030311	poly-N-acetyllactosamine biosynthetic process	8		4	50	2.25	0.16055	2935		0.16055	1368		2	25	1.52	0.46799	4377		0.46799	2773		1	12.5	0.26	0.23434	1992		0.23434	905		0	0	0.14	1	5126		1	2098		3	37.5	2.28	0.40919	4131		0.40919	2624		3
GO:0006449	regulation of translational termination	8		4	50	2.25	0.16055	2936		0.16055	1369		1	12.5	1.52	0.81539	6223		0.81539	4463		0	0	0.26	1	5089		1	4530		0	0	0.14	1	4265		1	2099		3	37.5	2.28	0.40919	4132		0.40919	2625		4
GO:0090331	negative regulation of platelet aggregation	8		4	50	2.25	0.16055	2937		0.16055	1370		2	25	1.52	0.46799	4380		0.46799	2776		1	12.5	0.26	0.23434	1988		0.23434	906		0	0	0.14	1	7427		1	2100		5	62.5	2.28	0.0468	1957		0.0468	638		4
GO:0039536	negative regulation of RIG-I signaling pathway	8		4	50	2.25	0.16055	2938		0.16055	1371		3	37.5	1.52	0.18212	2888		0.18212	1353		1	12.5	0.26	0.23434	1948		0.23434	888		1	12.5	0.14	0.12841	1103		0.12841	421		3	37.5	2.28	0.40919	4135		0.40919	2626		4
GO:0008344	adult locomotory behavior	49		16	32.6531	13.76	0.28397	3551		0.16056	1372		11	22.449	9.33	0.32342	3764		0.40888	2566		1	2.04082	1.61	0.80566	4124		0.80566	1977		2	4.08163	0.83	0.20296	1542		0.42216	1006		14	28.5714	13.95	0.54765	5023		0.42873	2694		13
GO:0045217	cell-cell junction maintenance	14		5	35.7143	3.93	0.35323	3882		0.16064	1373		1	7.14286	2.66	0.94804	7078		0.94804	5005		1	7.14286	0.46	0.37336	2697		0.37336	1299		0	0	0.24	1	6099		1	2101		4	28.5714	3.99	0.59665	5219		0.40933	2672		5
GO:0031468	nuclear envelope reassembly	15		5	33.3333	4.21	0.41795	4229		0.16067	1374		7	46.6667	2.85	0.01376	1347		0.00833	275		0	0	0.49	1	5846		1	2212		0	0	0.26	1	5243		1	2102		5	33.3333	4.27	0.43161	4220		0.16729	1419		5
GO:0050790	regulation of catalytic activity	1850		638	34.4865	519.35	4.1e-11	128		0.16081	1375		423	22.8649	352.1	4.9e-06	358		0.39341	2425		89	4.81081	60.71	9.5e-05	178		1	3251		41	2.21622	31.5	0.04387	631		0.58648	1155		624	33.7297	526.65	5.2e-08	210		0.18343	1496		626
GO:0010737	protein kinase A signaling	21		5	23.8095	5.9	0.74417	5818		0.16089	1376		6	28.5714	4	0.19621	2947		0.46763	2712		1	4.7619	0.69	0.50405	3193		1	3412		0	0	0.36	1	4704		1	2103		5	23.8095	5.98	0.75678	5911		0.16751	1424		5
GO:0070129	regulation of mitochondrial translation	25		6	24	7.02	0.74428	5831		0.1609	1377		4	16	4.76	0.72816	5719		0.18249	1364		0	0	0.82	1	7256		1	2659		0	0	0.43	1	6977		1	2104		6	24	7.12	0.75801	5938		0.16753	1425		6
GO:0046622	positive regulation of organ growth	33		8	24.2424	9.26	0.74785	5871		0.16094	1378		7	21.2121	6.28	0.44313	4211		0.18225	1361		0	0	1.08	1	6701		1	2657		0	0	0.56	1	6295		1	2105		10	30.303	9.39	0.47262	4559		0.04692	640		8
GO:0043297	apical junction assembly	51		13	25.4902	14.32	0.70918	5762		0.16094	1379		10	19.6078	9.71	0.51463	4509		0.46803	2785		0	0	1.67	1	6427		1	3453		1	1.96078	0.87	0.58423	2873		1	2106		13	25.4902	14.52	0.73013	5879		0.40963	2675		13
GO:2000241	regulation of reproductive process	104		23	22.1154	29.2	0.93169	7137		0.16158	1380		16	15.3846	19.79	0.86047	6492		0.23754	1644		4	3.84615	3.41	0.44632	2973		0.78424	1961		1	0.961538	1.77	0.8336	3407		1	2107		30	28.8462	29.61	0.50306	4725		0.16733	1421		22
GO:0001819	positive regulation of cytokine production	354		166	46.8927	99.38	1.9e-14	91		0.16195	1381		128	36.1582	67.38	1.3e-14	86		0.25328	1834		40	11.2994	11.62	6.9e-12	45		0.52577	1591		16	4.51977	6.03	0.00037	129		1	2108		164	46.3277	100.77	3.7e-13	97		0.17124	1432		164
GO:0007266	Rho protein signal transduction	171		54	31.5789	48	0.17284	3047		0.16392	1382		23	13.4503	32.55	0.97923	7336		0.58321	3210		7	4.09357	5.61	0.3301	2526		0.07236	341		1	0.584795	2.91	0.948	3615		1	2109		50	29.2398	48.68	0.43974	4259		0.18128	1474		55
GO:0006654	phosphatidic acid biosynthetic process	29		11	37.931	8.14	0.16392	2968		0.16392	1383		5	17.2414	5.52	0.67083	5383		0.67083	3741		2	6.89655	0.95	0.24611	2046		0.24611	933		0	0	0.49	1	4330		1	2110		11	37.931	8.26	0.1763	2966		0.1763	1441		10
GO:0007189	adenylate cyclase-activating G protein-coupled receptor signaling pathway	67		24	35.8209	18.81	0.1023	2469		0.16417	1384		18	26.8657	12.75	0.07339	2156		0.05914	700		2	2.98507	2.2	0.65075	3674		0.84584	2008		2	2.98507	1.14	0.31646	2035		0.31646	876		25	37.3134	19.07	0.07291	2243		0.11086	1124		24
GO:0030099	myeloid cell differentiation	351		150	42.735	98.54	1.7e-09	178		0.16458	1385		103	29.3447	66.8	1.5e-06	317		0.50399	2926		17	4.8433	11.52	0.07109	1053		0.13642	483		9	2.5641	5.98	0.14569	1248		0.30017	837		147	41.8803	99.92	3.4e-08	195		0.35415	2487		144
GO:0071805	potassium ion transmembrane transport	125		37	29.6	35.09	0.38404	4032		0.16518	1386		26	20.8	23.79	0.34062	3816		0.57688	3206		8	6.4	4.1	0.05348	961		0.07112	338		2	1.6	2.13	0.63149	3003		1	2111		37	29.6	35.58	0.42237	4204		0.38638	2558		36
GO:0034113	heterotypic cell-cell adhesion	48		18	37.5	13.47	0.09978	2459		0.16683	1387		10	20.8333	9.14	0.43194	4189		0.75663	4114		0	0	1.58	1	6099		1	4307		2	4.16667	0.82	0.19674	1497		0.41216	992		18	37.5	13.66	0.11123	2546		0.09176	993		17
GO:0030501	positive regulation of bone mineralization	26		10	38.4615	7.3	0.16725	2981		0.16725	1388		6	23.0769	4.95	0.37328	3946		0.37328	2404		2	7.69231	0.85	0.20946	1845		0.20946	842		1	3.84615	0.44	0.36044	2195		0.36044	933		9	34.6154	7.4	0.30818	3634		0.30818	2187		10
GO:0045214	sarcomere organization	26		10	38.4615	7.3	0.16725	2982		0.16725	1389		4	15.3846	4.95	0.75719	5842		0.75719	4118		0	0	0.85	1	6559		1	4310		0	0	0.44	1	6098		1	2112		8	30.7692	7.4	0.47038	4550		0.47038	3006		10
GO:0033077	T cell differentiation in thymus	63		19	30.1587	17.69	0.4021	4175		0.16756	1390		10	15.873	11.99	0.785	6067		0.21393	1539		1	1.5873	2.07	0.87844	4324		0.87844	2031		2	3.1746	1.07	0.29126	1951		0.5298	1111		17	26.9841	17.93	0.64953	5509		0.09256	994		18
GO:0051480	regulation of cytosolic calcium ion concentration	237		80	33.7553	66.53	0.03085	1815		0.16801	1391		66	27.8481	45.11	0.00055	696		0.34526	2317		12	5.06329	7.78	0.09103	1171		1	3205		11	4.64135	4.04	0.00248	221		1	2113		82	34.5992	67.47	0.02218	1568		0.06115	750		78
GO:0032386	regulation of intracellular transport	384		139	36.1979	107.8	0.00027	651		0.16824	1392		91	23.6979	73.08	0.01224	1318		0.60757	3309		10	2.60417	12.6	0.81472	4154		0.45346	1467		4	1.04167	6.54	0.89636	3514		0.92744	1344		130	33.8542	109.32	0.0111	1329		0.38296	2524		137
GO:0050921	positive regulation of chemotaxis	100		40	40	28.07	0.00653	1206		0.16827	1393		30	30	19.03	0.00537	1098		0.54164	3043		6	6	3.28	0.11069	1269		0.54919	1636		6	6	1.7	0.0072	323		1	2114		41	41	28.47	0.00465	1073		0.17607	1438		38
GO:0072657	protein localization to membrane	525		144	27.4286	147.38	0.64773	5436		0.16869	1394		121	23.0476	99.92	0.01094	1292		0.5598	3061		15	2.85714	17.23	0.74639	3980		0.54637	1629		9	1.71429	8.94	0.54	2778		1	2115		146	27.8095	149.45	0.64983	5516		0.18061	1471		142
GO:0042267	natural killer cell mediated cytotoxicity	49		23	46.9388	13.76	0.00374	1064		0.16869	1395		17	34.6939	9.33	0.00699	1147		0.04121	575		2	4.08163	1.61	0.48129	3107		1	2317		2	4.08163	0.83	0.20296	1541		0.22683	690		23	46.9388	13.95	0.00453	1066		0.17662	1443		23
GO:0015914	phospholipid transport	68		27	39.7059	19.09	0.02511	1748		0.16901	1396		16	23.5294	12.94	0.2106	2998		0.37249	2401		7	10.2941	2.23	0.00675	450		0.61624	1742		2	2.94118	1.16	0.32273	2051		0.61723	1180		27	39.7059	19.36	0.02985	1763		0.49283	3234		25
GO:0046474	glycerophospholipid biosynthetic process	203		64	31.5271	56.99	0.1527	2878		0.16902	1397		32	15.7635	38.64	0.90313	6795		0.35244	2369		3	1.47783	6.66	0.96499	4554		0.99676	2146		0	0	3.46	1	6270		1	2116		63	31.0345	57.79	0.22861	3300		0.17722	1445		60
GO:0031065	positive regulation of histone deacetylation	17		10	58.8235	4.77	0.00765	1264		0.16931	1398		7	41.1765	3.24	0.02927	1674		0.13999	1109		1	5.88235	0.56	0.43312	2940		1	2542		0	0	0.29	1	5202		1	2117		9	52.9412	4.84	0.02893	1730		0.17739	1446		9
GO:0005980	glycogen catabolic process	16		9	56.25	4.49	0.0165	1528		0.16942	1399		4	25	3.05	0.36318	3911		0.6483	3385		0	0	0.53	1	5005		1	3835		0	0	0.27	1	4141		1	2118		8	50	4.55	0.05612	2059		0.062	758		9
GO:0030330	DNA damage response, signal transduction by p53 class mediator	96		31	32.2917	26.95	0.20754	3158		0.16949	1400		16	16.6667	18.27	0.76119	5854		0.14096	1143		4	4.16667	3.15	0.38708	2761		0.2953	1092		1	1.04167	1.63	0.80889	3356		1	2119		34	35.4167	27.33	0.08259	2329		0.17699	1444		30
GO:0033194	response to hydroperoxide	19		9	47.3684	5.33	0.05753	2154		0.16955	1401		7	36.8421	3.62	0.05353	1954		0.34984	2336		0	0	0.62	1	6051		1	3212		0	0	0.32	1	5458		1	2120		11	57.8947	5.41	0.00684	1165		0.01599	367		8
GO:0045669	positive regulation of osteoblast differentiation	45		16	35.5556	12.63	0.16962	2991		0.16962	1402		11	24.4444	8.56	0.22535	3057		0.22535	1574		0	0	1.48	1	6594		1	2795		1	2.22222	0.77	0.53892	2761		0.53892	1121		17	37.7778	12.81	0.11275	2552		0.11275	1129		16
GO:0070493	thrombin-activated receptor signaling pathway	11		5	45.4545	3.09	0.16982	2996		0.16982	1403		2	18.1818	2.09	0.64856	5030		0.64856	3390		2	18.1818	0.36	0.04858	924		0.04858	275		0	0	0.19	1	7031		1	2121		4	36.3636	3.13	0.38552	3968		0.38552	2537		4
GO:0046007	negative regulation of activated T cell proliferation	11		5	45.4545	3.09	0.16982	2997		0.16982	1404		4	36.3636	2.09	0.14029	2644		0.14029	1120		2	18.1818	0.36	0.04858	920		0.04858	268		1	9.09091	0.19	0.17221	1378		0.17221	567		5	45.4545	3.13	0.17775	2973		0.17775	1449		5
GO:0070106	interleukin-27-mediated signaling pathway	11		5	45.4545	3.09	0.16982	2998		0.16982	1405		3	27.2727	2.09	0.35048	3854		0.35048	2344		2	18.1818	0.36	0.04858	925		0.04858	273		1	9.09091	0.19	0.17221	1382		0.17221	568		5	45.4545	3.13	0.17775	2974		0.17775	1450		5
GO:0070863	positive regulation of protein exit from endoplasmic reticulum	11		5	45.4545	3.09	0.16982	2999		0.16982	1406		2	18.1818	2.09	0.64856	5032		0.64856	3392		0	0	0.36	1	7326		1	3838		0	0	0.19	1	7060		1	2122		5	45.4545	3.13	0.17775	2976		0.17775	1451		4
GO:0031281	positive regulation of cyclase activity	11		5	45.4545	3.09	0.16982	3000		0.16982	1407		3	27.2727	2.09	0.35048	3856		0.35048	2346		0	0	0.36	1	5832		1	3217		0	0	0.19	1	5225		1	2123		5	45.4545	3.13	0.17775	2977		0.17775	1452		5
GO:2000009	negative regulation of protein localization to cell surface	11		5	45.4545	3.09	0.16982	3001		0.16982	1408		4	36.3636	2.09	0.14029	2652		0.14029	1128		1	9.09091	0.36	0.30732	2358		0.30732	1112		NA	NA	NA	NA	NA		NA	7833		6	54.5455	3.13	0.06204	2149		0.06204	769		5
GO:0070933	histone H4 deacetylation	11		5	45.4545	3.09	0.16982	3002		0.16982	1409		3	27.2727	2.09	0.35048	3859		0.35048	2349		0	0	0.36	1	7338		1	3219		0	0	0.19	1	7073		1	2124		4	36.3636	3.13	0.38552	3975		0.38552	2538		5
GO:0042532	negative regulation of tyrosine phosphorylation of STAT protein	11		5	45.4545	3.09	0.16982	3003		0.16982	1410		4	36.3636	2.09	0.14029	2659		0.14029	1135		3	27.2727	0.36	0.00476	405		0.00476	80		2	18.1818	0.19	0.01435	424		0.01435	94		6	54.5455	3.13	0.06204	2152		0.06204	770		4
GO:1904668	positive regulation of ubiquitin protein ligase activity	11		5	45.4545	3.09	0.16982	3004		0.16982	1411		3	27.2727	2.09	0.35048	3861		0.35048	2351		1	9.09091	0.36	0.30732	2376		0.30732	1119		NA	NA	NA	NA	NA		NA	7834		5	45.4545	3.13	0.17775	2980		0.17775	1453		6
GO:2000786	positive regulation of autophagosome assembly	11		5	45.4545	3.09	0.16982	3005		0.16982	1412		3	27.2727	2.09	0.35048	3863		0.35048	2353		1	9.09091	0.36	0.30732	2373		0.30732	1121		NA	NA	NA	NA	NA		NA	7835		4	36.3636	3.13	0.38552	3980		0.38552	2539		5
GO:0060546	negative regulation of necroptotic process	11		5	45.4545	3.09	0.16982	3006		0.16982	1413		3	27.2727	2.09	0.35048	3865		0.35048	2355		0	0	0.36	1	7118		1	3221		0	0	0.19	1	6803		1	2125		7	63.6364	3.13	0.01603	1424		0.01603	372		5
GO:0061154	endothelial tube morphogenesis	11		5	45.4545	3.09	0.16982	3007		0.16982	1414		6	54.5455	2.09	0.00906	1249		0.00906	302		0	0	0.36	1	7197		1	2218		2	18.1818	0.19	0.01435	425		0.01435	95		5	45.4545	3.13	0.17775	2983		0.17775	1454		5
GO:2001241	positive regulation of extrinsic apoptotic signaling pathway in absence of ligand	11		5	45.4545	3.09	0.16982	3008		0.16982	1415		3	27.2727	2.09	0.35048	3869		0.35048	2359		NA	NA	NA	NA	NA		NA	NA		NA	NA	NA	NA	NA		NA	7836		3	27.2727	3.13	0.64658	5482		0.64658	4026		4
GO:0010832	negative regulation of myotube differentiation	11		5	45.4545	3.09	0.16982	3009		0.16982	1416		4	36.3636	2.09	0.14029	2661		0.14029	1137		1	9.09091	0.36	0.30732	2355		0.30732	1115		1	9.09091	0.19	0.17221	1366		0.17221	569		5	45.4545	3.13	0.17775	2984		0.17775	1455		4
GO:0034356	NAD biosynthesis via nicotinamide riboside salvage pathway	11		5	45.4545	3.09	0.16982	3010		0.16982	1417		4	36.3636	2.09	0.14029	2662		0.14029	1138		1	9.09091	0.36	0.30732	2353		0.30732	1116		1	9.09091	0.19	0.17221	1371		0.17221	570		5	45.4545	3.13	0.17775	2985		0.17775	1456		4
GO:0045820	negative regulation of glycolytic process	11		5	45.4545	3.09	0.16982	3011		0.16982	1418		6	54.5455	2.09	0.00906	1251		0.00906	304		0	0	0.36	1	6620		1	2219		0	0	0.19	1	6175		1	2126		5	45.4545	3.13	0.17775	2986		0.17775	1457		5
GO:0006465	signal peptide processing	11		5	45.4545	3.09	0.16982	3012		0.16982	1419		6	54.5455	2.09	0.00906	1253		0.00906	306		0	0	0.36	1	5092		1	2221		0	0	0.19	1	4268		1	2127		5	45.4545	3.13	0.17775	2987		0.17775	1458		5
GO:0032897	negative regulation of viral transcription	37		12	32.4324	10.39	0.33381	3816		0.16986	1420		8	21.6216	7.04	0.40766	4124		0.14044	1142		0	0	1.21	1	5995		1	2553		1	2.7027	0.63	0.47078	2564		0.47078	1054		12	32.4324	10.53	0.3538	3861		0.17781	1464		12
GO:0030728	ovulation	18		6	33.3333	5.05	0.39342	4049		0.16997	1421		5	27.7778	3.43	0.2478	3320		0.35031	2340		1	5.55556	0.59	0.45175	2988		0.45175	1454		0	0	0.31	1	5151		1	2128		4	22.2222	5.12	0.79861	6145		0.64679	4050		5
GO:0051453	regulation of intracellular pH	56		27	48.2143	15.72	0.00106	832		0.17065	1422		17	30.3571	10.66	0.02788	1621		0.54329	3044		4	7.14286	1.84	0.1112	1272		0.53447	1603		1	1.78571	0.95	0.61858	2970		1	2129		28	50	15.94	0.00053	713		0.08451	974		25
GO:0043542	endothelial cell migration	161		55	34.1615	45.2	0.05228	2074		0.17094	1423		41	25.4658	30.64	0.02619	1581		0.02393	442		3	1.86335	5.28	0.90255	4397		0.55354	1657		5	3.10559	2.74	0.14046	1180		0.28908	823		50	31.0559	45.83	0.25734	3481		0.33319	2458		54
GO:1903829	positive regulation of cellular protein localization	288		96	33.3333	80.85	0.02743	1785		0.17098	1424		71	24.6528	54.81	0.01016	1269		0.83763	4519		10	3.47222	9.45	0.47345	3094		0.71844	1877		2	0.694444	4.9	0.95897	3640		1	2130		91	31.5972	81.99	0.13089	2645		0.18102	1473		95
GO:0006974	cellular response to DNA damage stimulus	765		192	25.098	214.76	0.9741	7507		0.17128	1425		123	16.0784	145.6	0.9871	7415		0.5938	3234		22	2.87582	25.11	0.77095	4039		0.6055	1723		7	0.915033	13.03	0.97839	3682		0.53172	1117		192	25.098	217.78	0.98579	7701		0.52262	3341		189
GO:0034122	negative regulation of toll-like receptor signaling pathway	36		18	50	10.11	0.00431	1097		0.17135	1426		14	38.8889	6.85	0.0044	1038		0.164	1186		4	11.1111	1.18	0.02942	782		0.22031	848		0	0	0.61	1	5531		1	2131		18	50	10.25	0.00507	1094		0.18198	1481		18
GO:0007093	mitotic cell cycle checkpoint	158		41	25.9494	44.35	0.75168	5882		0.17148	1427		21	13.2911	30.07	0.97838	7332		0.45568	2621		3	1.89873	5.19	0.8955	4381		0.84202	2007		2	1.26582	2.69	0.75412	3246		1	2132		45	28.481	44.98	0.52889	4793		0.18204	1482		40
GO:0006893	Golgi to plasma membrane transport	52		20	38.4615	14.6	0.06777	2242		0.17186	1428		15	28.8462	9.9	0.05676	1992		0.3271	2130		5	9.61538	1.71	0.02731	769		0.48476	1509		2	3.84615	0.89	0.22173	1627		1	2133		23	44.2308	14.8	0.01088	1322		0.085	976		20
GO:0022412	cellular process involved in reproduction in multicellular organism	243		56	23.0453	68.22	0.96855	7459		0.17204	1429		38	15.6379	46.25	0.92834	6933		0.35287	2370		10	4.11523	7.97	0.27682	2209		0.65482	1790		3	1.23457	4.14	0.78665	3298		0.6752	1225		65	26.749	69.18	0.74713	5900		0.17872	1467		53
GO:0042113	B cell activation	200		64	32	56.15	0.12245	2654		0.17228	1430		39	19.5	38.07	0.46135	4275		0.77651	4287		4	2	6.56	0.89817	4385		1	4421		2	1	3.41	0.85821	3451		0.82868	1305		64	32	56.93	0.15006	2857		0.18139	1475		60
GO:0007585	respiratory gaseous exchange	45		16	35.5556	12.63	0.16962	2992		0.17228	1431		9	20	8.56	0.49397	4456		0.16557	1208		2	4.44444	1.48	0.43732	2960		0.43732	1423		0	0	0.77	1	4473		1	2134		16	35.5556	12.81	0.18534	3081		0.18295	1493		16
GO:0034656	nucleobase-containing small molecule catabolic process	43		19	44.186	12.07	0.01716	1554		0.17245	1432		15	34.8837	8.18	0.01036	1273		0.10914	999		3	6.97674	1.41	0.16651	1538		1	2496		2	4.65116	0.73	0.16608	1346		1	2135		22	51.1628	12.24	0.00138	856		0.18092	1472		16
GO:0019432	triglyceride biosynthetic process	29		15	51.7241	8.14	0.00597	1170		0.17247	1433		9	31.0345	5.52	0.08427	2222		0.77597	4284		1	3.44828	0.95	0.62044	3580		0.62044	1749		1	3.44828	0.49	0.39262	2337		1	2136		15	51.7241	8.26	0.00688	1171		0.07239	808		13
GO:0043330	response to exogenous dsRNA	28		14	50	7.86	0.01135	1398		0.17259	1434		13	46.4286	5.33	0.00088	756		0.10901	998		6	21.4286	0.92	0.00025	215		0.07429	345		1	3.57143	0.48	0.38208	2290		1	2137		14	50	7.97	0.0129	1363		0.18158	1477		15
GO:0032469	endoplasmic reticulum calcium ion homeostasis	22		11	50	6.18	0.02395	1692		0.17282	1435		9	40.9091	4.19	0.01464	1393		0.26801	1855		2	9.09091	0.72	0.1617	1522		0.1617	615		3	13.6364	0.37	0.00591	306		0.2122	662		13	59.0909	6.26	0.00258	951		0.07239	809		11
GO:0033627	cell adhesion mediated by integrin	52		19	36.5385	14.6	0.11532	2601		0.17289	1436		8	15.3846	9.9	0.79905	6104		0.77712	4299		3	5.76923	1.71	0.24298	2044		1	4429		0	0	0.89	1	5493		1	2138		19	36.5385	14.8	0.1285	2637		0.18191	1480		19
GO:2000179	positive regulation of neural precursor cell proliferation	28		12	42.8571	7.86	0.06659	2233		0.17294	1437		9	32.1429	5.33	0.06936	2083		0.03506	523		2	7.14286	0.92	0.23385	1925		0.37298	1276		1	3.57143	0.48	0.38208	2294		1	2139		13	46.4286	7.97	0.03267	1798		0.18176	1478		10
GO:0061099	negative regulation of protein tyrosine kinase activity	26		11	42.3077	7.3	0.08439	2375		0.17302	1438		8	30.7692	4.95	0.10489	2388		0.51428	2934		0	0	0.85	1	7194		1	3558		0	0	0.44	1	6898		1	2140		12	46.1538	7.4	0.04143	1896		0.07259	832		10
GO:0019934	cGMP-mediated signaling	23		10	43.4783	6.46	0.08241	2363		0.17304	1439		5	21.7391	4.38	0.45193	4231		0.77658	4288		4	17.3913	0.75	0.00617	433		0.00971	103		1	4.34783	0.39	0.32656	2059		0.32656	885		12	52.1739	6.55	0.01396	1378		0.0229	452		9
GO:0006970	response to osmotic stress	61		20	32.7869	17.12	0.2453	3454		0.17316	1440		12	19.6721	11.61	0.50081	4466		0.26916	1873		2	3.27869	2	0.59965	3511		0.37375	1303		1	1.63934	1.04	0.6501	3047		1	2141		20	32.7869	17.37	0.26778	3509		0.36552	2496		17
GO:0090110	cargo loading into COPII-coated vesicle	14		6	42.8571	3.93	0.1733	3051		0.1733	1441		3	21.4286	2.66	0.51509	4517		0.51509	2938		2	14.2857	0.46	0.07538	1077		0.07538	354		0	0	0.24	1	7373		1	2142		7	50	3.99	0.07274	2228		0.07274	840		6
GO:0035855	megakaryocyte development	14		6	42.8571	3.93	0.1733	3052		0.1733	1442		3	21.4286	2.66	0.51509	4521		0.51509	2942		0	0	0.46	1	6230		1	3560		0	0	0.24	1	5698		1	2143		6	42.8571	3.99	0.1823	3034		0.1823	1486		6
GO:0046697	decidualization	14		6	42.8571	3.93	0.1733	3053		0.1733	1443		4	28.5714	2.66	0.26891	3391		0.26891	1864		0	0	0.46	1	6706		1	2950		1	7.14286	0.24	0.21382	1581		0.21382	671		6	42.8571	3.99	0.1823	3035		0.1823	1487		5
GO:0009954	proximal/distal pattern formation	14		6	42.8571	3.93	0.1733	3054		0.1733	1444		2	14.2857	2.66	0.77685	6021		0.77685	4291		0	0	0.46	1	5360		1	4423		0	0	0.24	1	4621		1	2144		7	50	3.99	0.07274	2231		0.07274	841		5
GO:2000811	negative regulation of anoikis	14		6	42.8571	3.93	0.1733	3055		0.1733	1445		2	14.2857	2.66	0.77685	6023		0.77685	4293		NA	NA	NA	NA	NA		NA	NA		NA	NA	NA	NA	NA		NA	7837		7	50	3.99	0.07274	2232		0.07274	842		4
GO:0045651	positive regulation of macrophage differentiation	14		6	42.8571	3.93	0.1733	3056		0.1733	1446		5	35.7143	2.66	0.10982	2419		0.10982	1006		0	0	0.46	1	6584		1	2499		0	0	0.24	1	6128		1	2145		6	42.8571	3.99	0.1823	3037		0.1823	1488		6
GO:0002052	positive regulation of neuroblast proliferation	14		6	42.8571	3.93	0.1733	3057		0.1733	1447		3	21.4286	2.66	0.51509	4529		0.51509	2950		1	7.14286	0.46	0.37336	2682		0.37336	1296		1	7.14286	0.24	0.21382	1574		0.21382	672		7	50	3.99	0.07274	2235		0.07274	843		4
GO:1903831	signal transduction involved in cellular response to ammonium ion	14		6	42.8571	3.93	0.1733	3058		0.1733	1448		5	35.7143	2.66	0.10982	2421		0.10982	1008		NA	NA	NA	NA	NA		NA	NA		1	7.14286	0.24	0.21382	1568		0.21382	673		6	42.8571	3.99	0.1823	3039		0.1823	1489		5
GO:0048041	focal adhesion assembly	67		23	34.3284	18.81	0.15707	2895		0.17338	1449		16	23.8806	12.75	0.19309	2937		0.65352	3712		1	1.49254	2.2	0.8937	4375		1	4052		0	0	1.14	1	6340		1	2146		22	32.8358	19.07	0.25165	3470		0.34853	2480		22
GO:0032438	melanosome organization	22		10	45.4545	6.18	0.06158	2201		0.17345	1450		7	31.8182	4.19	0.10819	2407		0.40977	2570		1	4.54545	0.72	0.52035	3238		0.52035	1577		2	9.09091	0.37	0.05334	676		0.05334	179		10	45.4545	6.26	0.06704	2213		0.18334	1495		10
GO:0002263	cell activation involved in immune response	642		374	58.2555	180.23	< 1e-30	16		0.17348	1451		277	43.1464	122.19	< 1e-30	13		0.44412	2601		33	5.14019	21.07	0.00714	455		1	3346		18	2.80374	10.93	0.02606	515		1	2147		379	59.0343	182.76	< 1e-30	15		0.17788	1465		366
GO:0050771	negative regulation of axonogenesis	54		16	29.6296	15.16	0.45019	4530		0.17352	1452		12	22.2222	10.28	0.32513	3766		0.03518	529		3	5.55556	1.77	0.26073	2161		0.39343	1323		2	3.7037	0.92	0.23432	1685		0.27815	806		15	27.7778	15.37	0.59596	5214		0.36627	2504		14
GO:0071404	cellular response to low-density lipoprotein particle stimulus	17		7	41.1765	4.77	0.17375	3074		0.17375	1453		5	29.4118	3.24	0.20959	2980		0.20959	1534		0	0	0.56	1	7382		1	2781		0	0	0.29	1	7148		1	2148		7	41.1765	4.84	0.18365	3067		0.18365	1497		6
GO:0044030	regulation of DNA methylation	17		7	41.1765	4.77	0.17375	3075		0.17375	1454		5	29.4118	3.24	0.20959	2981		0.20959	1535		1	5.88235	0.56	0.43312	2938		0.43312	1408		0	0	0.29	1	6012		1	2149		7	41.1765	4.84	0.18365	3068		0.18365	1498		7
GO:0036151	phosphatidylcholine acyl-chain remodeling	17		7	41.1765	4.77	0.17375	3076		0.17375	1455		8	47.0588	3.24	0.00801	1183		0.00801	270		1	5.88235	0.56	0.43312	2930		0.43312	1401		0	0	0.29	1	5739		1	2150		10	58.8235	4.84	0.00851	1231		0.00851	299		7
GO:0030318	melanocyte differentiation	17		7	41.1765	4.77	0.17375	3077		0.17375	1456		2	11.7647	3.24	0.86216	6505		0.86216	4646		2	11.7647	0.56	0.10571	1240		0.10571	431		1	5.88235	0.29	0.25334	1770		0.25334	753		7	41.1765	4.84	0.18365	3070		0.18365	1499		7
GO:0035338	long-chain fatty-acyl-CoA biosynthetic process	17		7	41.1765	4.77	0.17375	3078		0.17375	1457		4	23.5294	3.24	0.41044	4144		0.41044	2574		1	5.88235	0.56	0.43312	2928		0.43312	1409		0	0	0.29	1	5644		1	2151		8	47.0588	4.84	0.08029	2283		0.08029	876		6
GO:0001895	retina homeostasis	41		12	29.2683	11.51	0.49114	4718		0.17409	1458		7	17.0732	7.8	0.68703	5412		0.21023	1537		1	2.43902	1.35	0.74595	3976		0.74595	1922		1	2.43902	0.7	0.50602	2681		1	2152		12	29.2683	11.67	0.51371	4743		0.18401	1501		10
GO:0051246	regulation of protein metabolic process	2223		749	33.6932	624.06	9.7e-11	135		0.17831	1459		526	23.6617	423.09	1.3e-09	158		0.08626	809		104	4.67836	72.95	6.4e-05	164		1	2402		52	2.33918	37.85	0.00872	347		1	2153		728	32.7485	632.83	6.5e-07	288		0.18632	1502		728
GO:0016567	protein ubiquitination	684		205	29.9708	192.02	0.13776	2760		0.17931	1460		137	20.0292	130.18	0.26179	3362		0.67679	3743		33	4.82456	22.45	0.0171	634		0.54912	1635		9	1.31579	11.65	0.82998	3395		0.89401	1332		203	29.6784	194.72	0.24807	3464		0.22186	1625		201
GO:0008283	cell proliferation	1560		498	31.9231	437.93	0.0002	631		0.18131	1461		342	21.9231	296.91	0.00124	808		0.16447	1190		60	3.84615	51.2	0.10575	1252		0.57094	1683		44	2.82051	26.56	0.00047	139		0.68247	1228		506	32.4359	444.09	0.00014	599		0.08305	973		482
GO:0010508	positive regulation of autophagy	108		44	40.7407	30.32	0.00299	1032		0.18229	1462		31	28.7037	20.56	0.00944	1263		0.06509	721		9	8.33333	3.54	0.00906	491		0.45339	1466		2	1.85185	1.84	0.55179	2801		1	2154		44	40.7407	30.74	0.00398	1043		0.11427	1136		42
GO:0008217	regulation of blood pressure	114		41	35.9649	32	0.03995	1925		0.18362	1463		25	21.9298	21.7	0.24669	3306		0.23438	1586		5	4.38596	3.74	0.31962	2443		0.40231	1354		2	1.75439	1.94	0.58124	2868		0.58124	1151		42	36.8421	32.45	0.03184	1791		0.19817	1595		39
GO:0050804	modulation of chemical synaptic transmission	297		91	30.6397	83.38	0.17568	3091		0.18399	1464		54	18.1818	56.53	0.67028	5380		0.84206	4549		7	2.3569	9.75	0.86038	4268		0.93179	2089		7	2.3569	5.06	0.24336	1745		1	2155		89	29.9663	84.55	0.30135	3622		0.45093	2952		85
GO:0002237	response to molecule of bacterial origin	274		141	51.4599	76.92	1.4e-16	76		0.18616	1465		104	37.9562	52.15	1.2e-13	91		0.46119	2644		31	11.3139	8.99	1.7e-09	64		1	3373		15	5.47445	4.67	7.1e-05	84		1	2156		141	51.4599	78	4.9e-16	68		0.19101	1504		140
GO:0033138	positive regulation of peptidyl-serine phosphorylation	75		25	33.3333	21.05	0.18619	3114		0.18619	1466		19	25.3333	14.27	0.1087	2413		0.1087	995		2	2.66667	2.46	0.71066	3856		0.71066	1869		0	0	1.28	1	5443		1	2157		22	29.3333	21.35	0.47743	4579		0.47743	3013		24
GO:0071216	cellular response to biotic stimulus	196		104	53.0612	55.02	1.1e-13	102		0.18762	1467		78	39.7959	37.3	9.2e-12	121		1	6024		23	11.7347	6.43	1.2e-07	84		0.5062	1560		10	5.10204	3.34	0.00195	206		1	2158		105	53.5714	55.8	9.6e-14	90		0.19236	1506		105
GO:0002429	immune response-activating cell surface receptor signaling pathway	274		125	45.6204	76.92	3.1e-10	148		0.18768	1468		88	32.1168	52.15	1.2e-07	246		0.4637	2670		18	6.56934	8.99	0.00412	398		0.09346	384		6	2.18978	4.67	0.32442	2054		1	2159		121	44.1606	78	1.6e-08	185		0.19293	1508		122
GO:0002573	myeloid leukocyte differentiation	168		79	47.0238	47.16	1.2e-07	256		0.18925	1469		54	32.1429	31.97	3.2e-05	438		1	5778		13	7.7381	5.51	0.00361	387		0.17881	636		6	3.57143	2.86	0.06757	748		1	2160		79	47.0238	47.83	2.2e-07	256		0.19409	1509		76
GO:0018212	peptidyl-tyrosine modification	301		109	36.2126	84.5	0.00115	837		0.18992	1470		78	25.9136	57.29	0.00185	889		0.46606	2681		13	4.31894	9.88	0.19135	1721		1	3393		8	2.65781	5.13	0.14257	1187		1	2161		104	34.5515	85.69	0.01165	1341		0.1953	1514		106
GO:0070661	leukocyte proliferation	233		90	38.6266	65.41	0.00028	654		0.18992	1471		68	29.1845	44.35	0.0001	533		0.64807	3381		14	6.00858	7.65	0.0217	708		0.15178	508		8	3.43348	3.97	0.04614	645		1	2162		93	39.9142	66.33	9.9e-05	568		0.19451	1511		88
GO:0051650	establishment of vesicle localization	241		90	37.3444	67.66	0.00102	827		0.19014	1472		53	21.9917	45.87	0.13659	2608		0.09444	908		14	5.80913	7.91	0.02795	772		1	2457		6	2.48963	4.1	0.22865	1672		1	2163		86	35.6846	68.61	0.00838	1227		0.1954	1516		90
GO:1903557	positive regulation of tumor necrosis factor superfamily cytokine production	68		40	58.8235	19.09	1e-07	252		0.1903	1473		33	48.5294	12.94	3.4e-08	206		0.09352	899		9	13.2353	2.23	0.00036	233		1	2450		1	1.47059	1.16	0.68992	3120		1	2164		41	60.2941	19.36	4.2e-08	202		0.19501	1512		39
GO:2000117	negative regulation of cysteine-type endopeptidase activity	79		41	51.8987	22.18	6.4e-06	396		0.19049	1474		26	32.9114	15.04	0.00231	921		0.46761	2709		7	8.86076	2.59	0.01487	601		0.15247	513		2	2.53165	1.35	0.3905	2315		1	2165		41	51.8987	22.49	9.3e-06	411		0.19531	1515		39
GO:0048199	vesicle targeting, to, from or within Golgi	70		38	54.2857	19.65	3.4e-06	375		0.19054	1475		22	31.4286	13.32	0.00885	1242		0.56887	3093		7	10	2.3	0.00789	478		1	3648		2	2.85714	1.19	0.33523	2092		1	2166		37	52.8571	19.93	1.5e-05	433		0.19545	1517		37
GO:0050851	antigen receptor-mediated signaling pathway	174		66	37.931	48.85	0.0029	1026		0.19064	1476		41	23.5632	33.12	0.07816	2174		0.09439	905		7	4.02299	5.71	0.34611	2574		1	2455		1	0.574713	2.96	0.95065	3622		1	2167		65	37.3563	49.53	0.00661	1153		0.19559	1519		64
GO:1903426	regulation of reactive oxygen species biosynthetic process	70		35	50	19.65	8.1e-05	565		0.19082	1477		31	44.2857	13.32	1.1e-06	313		0.09369	900		NA	NA	NA	NA	NA		NA	NA		2	2.85714	1.19	0.33523	2093		1	2168		36	51.4286	19.93	4.1e-05	505		0.6321	3735		35
GO:0070585	protein localization to mitochondrion	134		51	38.0597	37.62	0.00754	1252		0.191	1478		39	29.1045	25.5	0.00303	971		0.09399	901		6	4.47761	4.4	0.27737	2211		1	2451		1	0.746269	2.28	0.90108	3529		1	2169		53	39.5522	38.15	0.00358	1029		0.19565	1520		52
GO:2001057	reactive nitrogen species metabolic process	62		30	48.3871	17.41	0.00053	746		0.19108	1479		26	41.9355	11.8	2.7e-05	434		0.46712	2695		3	4.83871	2.03	0.33284	2545		1	3402		2	3.22581	1.06	0.28493	1914		1	2170		34	54.8387	17.65	1.1e-05	418		0.19552	1518		31
GO:0097581	lamellipodium organization	74		33	44.5946	20.77	0.0017	895		0.19111	1480		19	25.6757	14.08	0.09783	2333		0.46854	2800		3	4.05405	2.43	0.43987	2968		0.20843	836		2	2.7027	1.26	0.36001	2193		1	2171		32	43.2432	21.07	0.00455	1068		0.19603	1522		32
GO:0044088	regulation of vacuole organization	38		22	57.8947	10.67	0.00011	589		0.1912	1481		14	36.8421	7.23	0.00767	1175		0.09448	909		3	7.89474	1.25	0.12776	1340		0.09508	395		1	2.63158	0.65	0.47982	2595		0.47982	1066		23	60.5263	10.82	3.7e-05	500		0.02287	450		19
GO:0032732	positive regulation of interleukin-1 production	35		21	60	9.83	7.7e-05	559		0.19122	1482		17	48.5714	6.66	7.2e-05	502		0.46771	2714		8	22.8571	1.15	1.4e-05	137		0.09397	385		2	5.71429	0.6	0.11923	1078		1	2172		23	65.7143	9.96	5.1e-06	372		0.63247	3738		20
GO:0035914	skeletal muscle cell differentiation	46		14	30.4348	12.91	0.41465	4212		0.19137	1483		6	13.0435	8.75	0.89452	6682		0.78055	4305		2	4.34783	1.51	0.4485	2976		0.4485	1434		4	8.69565	0.78	0.00763	333		0.00763	73		14	30.4348	13.1	0.43824	4251		0.20585	1600		11
GO:0006026	aminoglycan catabolic process	50		23	46	14.04	0.00511	1143		0.19142	1484		18	36	9.52	0.00357	1002		0.468	2782		4	8	1.64	0.0809	1119		1	3451		2	4	0.85	0.20919	1559		1	2173		25	50	14.23	0.00103	814		0.19605	1523		25
GO:0002820	negative regulation of adaptive immune response	36		19	52.7778	10.11	0.00151	884		0.19143	1485		15	41.6667	6.85	0.00144	842		0.09438	904		2	5.55556	1.18	0.3318	2538		1	2454		1	2.77778	0.61	0.46159	2544		1	2174		18	50	10.25	0.00507	1095		0.19633	1527		19
GO:1902108	regulation of mitochondrial membrane permeability involved in apoptotic process	54		24	44.4444	15.16	0.00727	1242		0.19143	1486		16	29.6296	10.28	0.03999	1783		0.46842	2794		1	1.85185	1.77	0.83563	4197		1	3462		1	1.85185	0.92	0.60519	2931		1	2175		23	42.5926	15.37	0.01813	1486		0.19634	1528		24
GO:1900407	regulation of cellular response to oxidative stress	65		27	41.5385	18.25	0.01326	1455		0.19144	1487		25	38.4615	12.37	0.0002	590		0.46736	2701		3	4.61538	2.13	0.35995	2652		1	3407		0	0	1.11	1	7684		1	2176		29	44.6154	18.5	0.00392	1040		0.19607	1524		28
GO:0032928	regulation of superoxide anion generation	16		13	81.25	4.49	1.5e-05	440		0.19147	1488		10	62.5	3.05	0.00016	572		0.46823	2791		1	6.25	0.53	0.41386	2885		1	3459		0	0	0.27	1	5420		1	2177		12	75	4.55	0.00015	613		0.63314	3750		12
GO:0002369	T cell cytokine production	34		18	52.9412	9.54	0.00191	923		0.19147	1489		14	41.1765	6.47	0.00235	932		0.09442	906		2	5.88235	1.12	0.30747	2421		1	2456		3	8.82353	0.58	0.01977	481		1	2178		17	50	9.68	0.00639	1146		0.19637	1529		18
GO:0001912	positive regulation of leukocyte mediated cytotoxicity	46		21	45.6522	12.91	0.00812	1312		0.1915	1490		18	39.1304	8.75	0.0012	803		0.46788	2717		3	6.52174	1.51	0.19122	1716		0.09514	404		1	2.17391	0.78	0.5468	2789		1	2179		20	43.4783	13.1	0.02083	1556		0.19641	1530		21
GO:0098927	vesicle-mediated transport between endosomal compartments	39		19	48.7179	10.95	0.00489	1126		0.19151	1491		11	28.2051	7.42	0.10755	2403		1	7468		0	0	1.28	1	7723		1	7047		0	0	0.66	1	7563		1	2180		20	51.2821	11.1	0.00217	919		0.19622	1526		18
GO:0062208	positive regulation of pattern recogniti...	29		16	55.1724	8.14	0.00192	925		0.19153	1492		13	44.8276	5.52	0.00132	827		0.00684	259		7	24.1379	0.95	3.3e-05	150		1	2206		3	10.3448	0.49	0.01284	405		1	2181		16	55.1724	8.26	0.00226	925		0.6331	3748		15
GO:1904064	positive regulation of cation transmembrane transport	94		34	36.1702	26.39	0.05318	2080		0.19155	1493		28	29.7872	17.89	0.00777	1179		0.09424	903		4	4.25532	3.08	0.37211	2677		1	2453		7	7.44681	1.6	0.0011	173		1	2182		30	31.9149	26.76	0.26166	3487		0.19676	1550		34
GO:0071214	cellular response to abiotic stimulus	263		81	30.7985	73.83	0.17721	3095		0.19158	1494		49	18.6312	50.06	0.5917	4799		0.46946	2888		10	3.80228	8.63	0.36271	2656		1	3530		3	1.14068	4.48	0.82926	3394		1	2183		85	32.3194	74.87	0.09292	2372		0.19609	1525		78
GO:0042987	amyloid precursor protein catabolic process	30		15	50	8.42	0.00889	1327		0.19165	1495		12	40	5.71	0.00627	1131		0.09451	911		1	3.33333	0.98	0.63292	3624		1	2459		1	3.33333	0.51	0.40299	2364		1	2184		17	56.6667	8.54	0.00111	828		0.02294	455		15
GO:0018126	protein hydroxylation	23		13	56.5217	6.46	0.00385	1071		0.19165	1496		7	30.4348	4.38	0.13121	2525		0.09477	926		2	8.69565	0.75	0.17346	1551		0.39341	1321		0	0	0.39	1	4938		1	2185		12	52.1739	6.55	0.01396	1379		0.02299	467		12
GO:0046755	viral budding	23		13	56.5217	6.46	0.00385	1072		0.19165	1497		12	52.1739	4.38	0.00037	662		0.46813	2789		0	0	0.75	1	6708		1	3457		0	0	0.39	1	6305		1	2186		12	52.1739	6.55	0.01396	1381		0.19655	1535		13
GO:0071402	cellular response to lipoprotein particle stimulus	27		14	51.8519	7.58	0.00761	1256		0.19166	1498		10	37.037	5.14	0.02193	1522		1	5870		0	0	0.89	1	7381		1	5610		1	3.7037	0.46	0.37135	2244		0.37135	945		15	55.5556	7.69	0.00282	973		0.02296	464		14
GO:0032620	interleukin-17 production	24		13	54.1667	6.74	0.00626	1196		0.19168	1499		12	50	4.57	0.00061	709		0.09443	907		2	8.33333	0.79	0.18536	1690		0.0952	407		1	4.16667	0.41	0.33805	2112		1	2187		13	54.1667	6.83	0.00711	1182		0.19648	1533		13
GO:0006942	regulation of striated muscle contraction	62		23	37.0968	17.41	0.07704	2335		0.19174	1500		18	29.0323	11.8	0.0371	1773		0.09452	912		2	3.22581	2.03	0.60854	3555		1	2460		2	3.22581	1.06	0.28493	1913		1	2188		23	37.0968	17.65	0.08787	2346		0.19656	1536		22
GO:0061458	reproductive system development	309		92	29.7735	86.74	0.26933	3509		0.19176	1501		62	20.0647	58.81	0.34216	3825		0.4688	2807		15	4.85437	10.14	0.0849	1138		1	3471		5	1.61812	5.26	0.60847	2936		1	2189		93	30.0971	87.96	0.27947	3527		0.19658	1537		87
GO:0007176	regulation of epidermal growth factor-activated receptor activity	24		12	50	6.74	0.01863	1592		0.19177	1502		8	33.3333	4.57	0.06995	2099		1	6360		1	4.16667	0.79	0.55137	3364		1	6035		0	0	0.41	1	4431		1	2190		12	50	6.83	0.02081	1549		0.19658	1538		12
GO:0045064	T-helper 2 cell differentiation	14		9	64.2857	3.93	0.00509	1140		0.19179	1503		9	64.2857	2.66	0.00026	623		0.09451	910		0	0	0.46	1	6543		1	2458		1	7.14286	0.24	0.21382	1586		1	2191		9	64.2857	3.99	0.00564	1117		0.19659	1539		9
GO:0002291	T cell activation via T cell receptor contact with antigen bound to MHC molecule on antigen presenting cell	8		7	87.5	2.25	0.00083	796		0.19182	1504		7	87.5	1.52	6e-05	491		0.09457	913		1	12.5	0.26	0.23434	2007		1	2461		1	12.5	0.14	0.12841	1132		1	2192		7	87.5	2.28	0.00091	798		0.19662	1540		7
GO:0010758	regulation of macrophage chemotaxis	19		10	52.6316	5.33	0.02051	1611		0.19183	1505		10	52.6316	3.62	0.00105	784		0.46832	2793		2	10.5263	0.62	0.12744	1335		1	3461		2	10.5263	0.32	0.04081	620		1	2193		10	52.6316	5.41	0.02262	1573		0.19663	1541		10
GO:0043487	regulation of RNA stability	119		38	31.9328	33.41	0.19953	3134		0.19183	1506		30	25.2101	22.65	0.05757	1996		0.46816	2790		5	4.20168	3.91	0.35221	2633		1	3458		3	2.52101	2.03	0.33051	2087		1	2194		36	30.2521	33.88	0.36543	3892		0.19687	1561		35
GO:1900221	regulation of amyloid-beta clearance	9		7	77.7778	2.53	0.00281	1024		0.19185	1507		6	66.6667	1.71	0.00234	928		0.09466	920		NA	NA	NA	NA	NA		NA	NA		1	11.1111	0.15	0.14326	1206		0.14326	473		8	88.8889	2.56	0.00029	656		0.02299	468		6
GO:0045913	positive regulation of carbohydrate metabolic process	59		21	35.5932	16.56	0.12749	2670		0.19185	1508		11	18.6441	11.23	0.58291	4771		0.46933	2878		1	1.69492	1.94	0.86099	4272		1	3522		1	1.69492	1	0.63781	3024		1	2195		18	30.5085	16.8	0.4117	4181		0.19695	1575		20
GO:0002830	positive regulation of type 2 immune response	14		8	57.1429	3.93	0.0211	1639		0.19188	1509		6	42.8571	2.66	0.03508	1752		1	5679		1	7.14286	0.46	0.37336	2723		1	5430		2	14.2857	0.24	0.02296	500		1	2196		8	57.1429	3.99	0.02296	1619		0.19669	1544		8
GO:0036006	cellular response to macrophage colony-stimulating factor stimulus	11		7	63.6364	3.09	0.0148	1490		0.1919	1510		3	27.2727	2.09	0.35048	3890		1	6126		1	9.09091	0.36	0.30732	2392		1	5836		0	0	0.19	1	5721		1	2197		6	54.5455	3.13	0.06204	2160		0.1968	1552		6
GO:1901881	positive regulation of protein depolymerization	15		8	53.3333	4.21	0.03426	1846		0.19191	1511		3	20	2.85	0.56493	4725		0.46927	2872		3	20	0.49	0.0119	540		0.09491	392		1	6.66667	0.26	0.22722	1648		0.22722	695		7	46.6667	4.27	0.10391	2432		0.19681	1554		8
GO:0097494	regulation of vesicle size	8		6	75	2.25	0.0079	1286		0.19191	1512		3	37.5	1.52	0.18212	2897		0.46907	2828		0	0	0.26	1	7677		1	3483		0	0	0.14	1	7505		1	2198		6	75	2.28	0.00852	1253		0.19672	1545		6
GO:1990182	exosomal secretion	19		9	47.3684	5.33	0.05753	2155		0.19192	1513		9	47.3684	3.62	0.00469	1045		0.46847	2796		1	5.26316	0.62	0.46977	3071		1	3464		NA	NA	NA	NA	NA		NA	7838		9	47.3684	5.41	0.06236	2178		0.19673	1546		9
GO:0046642	negative regulation of alpha-beta T cell proliferation	9		6	66.6667	2.53	0.01808	1577		0.19194	1514		6	66.6667	1.71	0.00234	927		0.09466	919		1	11.1111	0.3	0.25948	2152		1	2465		1	11.1111	0.15	0.14326	1236		1	2199		6	66.6667	2.56	0.01941	1512		0.19674	1547		6
GO:1905146	lysosomal protein catabolic process	9		6	66.6667	2.53	0.01808	1578		0.19194	1515		6	66.6667	1.71	0.00234	929		0.09466	921		NA	NA	NA	NA	NA		NA	NA		NA	NA	NA	NA	NA		NA	7839		6	66.6667	2.56	0.01941	1513		0.19674	1548		5
GO:0070230	positive regulation of lymphocyte apoptotic process	13		7	53.8462	3.65	0.04456	2007		0.19195	1516		7	53.8462	2.47	0.00523	1086		0.09464	918		2	15.3846	0.43	0.06601	1022		0.09512	403		1	7.69231	0.22	0.20018	1530		1	2200		6	46.1538	3.7	0.13535	2665		0.19685	1557		7
GO:0044794	positive regulation by host of viral process	14		7	50	3.93	0.06802	2254		0.19198	1517		6	42.8571	2.66	0.03508	1747		0.09472	924		0	0	0.46	1	6517		1	2466		1	7.14286	0.24	0.21382	1569		0.21382	674		8	57.1429	3.99	0.02296	1616		0.02302	472		7
GO:0034111	negative regulation of homotypic cell-cell adhesion	11		6	54.5455	3.09	0.05829	2173		0.19199	1518		3	27.2727	2.09	0.35048	3874		0.46915	2850		1	9.09091	0.36	0.30732	2387		1	3499		0	0	0.19	1	5528		1	2201		6	54.5455	3.13	0.06204	2167		0.63369	3767		6
GO:0002710	negative regulation of T cell mediated immunity	15		7	46.6667	4.21	0.09756	2447		0.192	1519		4	26.6667	2.85	0.31576	3611		0.46912	2841		0	0	0.49	1	4913		1	3493		1	6.66667	0.26	0.22722	1637		0.22722	696		7	46.6667	4.27	0.10391	2431		0.19681	1555		7
GO:0034627	'de novo' NAD biosynthetic process	8		5	62.5	2.25	0.0442	1978		0.19201	1520		4	50	1.52	0.04778	1868		0.46892	2815		1	12.5	0.26	0.23434	2012		1	3475		0	0	0.14	1	5586		1	2202		5	62.5	2.28	0.0468	1959		0.19681	1556		5
GO:2001258	negative regulation of cation channel activity	30		11	36.6667	8.42	0.19657	3126		0.19202	1521		10	33.3333	5.71	0.04535	1840		0.46864	2802		NA	NA	NA	NA	NA		NA	NA		2	6.66667	0.51	0.09202	892		0.31384	858		11	36.6667	8.54	0.21059	3141		0.63373	3771		11
GO:1902170	cellular response to reactive nitrogen species	16		7	43.75	4.49	0.13298	2722		0.19203	1522		1	6.25	3.05	0.96596	7231		1	5875		NA	NA	NA	NA	NA		NA	NA		NA	NA	NA	NA	NA		NA	7840		6	37.5	4.55	0.29064	3575		0.63385	3788		7
GO:0031112	positive regulation of microtubule polymerization or depolymerization	27		10	37.037	7.58	0.20231	3146		0.19204	1523		9	33.3333	5.14	0.05621	1989		0.4687	2803		2	7.40741	0.89	0.22163	1878		0.09522	408		1	3.7037	0.46	0.37135	2246		0.37135	946		10	37.037	7.69	0.21585	3155		0.19685	1558		10
GO:0003176	aortic valve development	13		6	46.1538	3.65	0.12818	2680		0.19204	1524		4	30.7692	2.47	0.22346	3022		0.0069	264		0	0	0.43	1	4951		1	2209		0	0	0.22	1	4085		1	2203		6	46.1538	3.7	0.13535	2666		0.19685	1559		5
GO:0061430	bone trabecula morphogenesis	10		5	50	2.81	0.11912	2632		0.19206	1525		1	10	1.9	0.87901	6584		0.87901	4703		0	0	0.33	1	7210		1	4683		0	0	0.17	1	6925		1	2204		4	40	2.85	0.30997	3645		0.19696	1577		5
GO:0002418	immune response to tumor cell	14		6	42.8571	3.93	0.1733	3059		0.19207	1526		4	28.5714	2.66	0.26891	3401		0.46909	2834		2	14.2857	0.46	0.07538	1083		1	3487		0	0	0.24	1	3975		1	2205		5	35.7143	3.99	0.36593	3906		0.63391	3797		6
GO:0044070	regulation of anion transport	64		20	31.25	17.97	0.32862	3804		0.19207	1527		15	23.4375	12.18	0.22507	3049		1	5925		1	1.5625	2.1	0.88245	4349		1	5658		2	3.125	1.09	0.29757	1964		1	2206		18	28.125	18.22	0.57153	5080		1	5918		21
GO:0003158	endothelium development	89		27	30.3371	24.98	0.35447	3917		0.19208	1528		20	22.4719	16.94	0.23941	3154		0.46882	2809		4	4.49438	2.92	0.33461	2548		1	3473		2	2.24719	1.52	0.44939	2515		1	2207		27	30.3371	25.34	0.38607	4008		0.19691	1567		25
GO:0048305	immunoglobulin secretion	18		7	38.8889	5.05	0.21909	3188		0.19208	1529		6	33.3333	3.43	0.11023	2442		0.4689	2812		2	11.1111	0.59	0.11645	1287		0.09515	405		0	0	0.31	1	6376		1	2208		8	44.4444	5.12	0.1097	2542		0.63368	3765		7
GO:0045989	positive regulation of striated muscle contraction	11		5	45.4545	3.09	0.16982	3013		0.19209	1530		3	27.2727	2.09	0.35048	3875		0.46915	2851		0	0	0.36	1	6658		1	3500		1	9.09091	0.19	0.17221	1389		0.17221	571		4	36.3636	3.13	0.38552	3967		0.19699	1580		5
GO:0035303	regulation of dephosphorylation	175		51	29.1429	49.13	0.40369	4191		0.19209	1531		37	21.1429	33.31	0.26403	3373		0.46872	2804		2	1.14286	5.74	0.98037	4593		1	3469		2	1.14286	2.98	0.80242	3341		1	2209		49	28	49.82	0.58354	5186		0.19715	1589		50
GO:0072109	glomerular mesangium development	8		4	50	2.25	0.16055	2939		0.1921	1532		2	25	1.52	0.46799	4412		1	7226		0	0	0.26	1	7460		1	6824		1	12.5	0.14	0.12841	1151		1	2210		4	50	2.28	0.16716	2923		0.1969	1565		2
GO:0071071	regulation of phospholipid biosynthetic process	12		5	41.6667	3.37	0.22713	3329		0.19211	1533		5	41.6667	2.28	0.06031	2022		0.09477	925		1	8.33333	0.39	0.33007	2467		0.33007	1180		0	0	0.2	1	7097		1	2211		5	41.6667	3.42	0.23689	3430		0.63384	3784		4
GO:0003177	pulmonary valve development	12		5	41.6667	3.37	0.22713	3330		0.19211	1534		3	25	2.28	0.40721	4099		0.40721	2553		0	0	0.39	1	4952		1	3328		0	0	0.2	1	4086		1	2212		5	41.6667	3.42	0.23689	3411		0.19692	1569		4
GO:0019755	one-carbon compound transport	9		4	44.4444	2.53	0.22751	3361		0.19213	1535		3	33.3333	1.71	0.23652	3137		1	6495		0	0	0.3	1	5673		1	6157		0	0	0.15	1	5009		1	2213		4	44.4444	2.56	0.23605	3350		0.19693	1571		2
GO:0098779	positive regulation of mitophagy in response to mitochondrial depolarization	9		4	44.4444	2.53	0.22751	3362		0.19213	1536		1	11.1111	1.71	0.85054	6431		0.85054	4608		0	0	0.3	1	7702		1	4622		0	0	0.15	1	7537		1	2214		3	33.3333	2.56	0.49576	4700		0.63397	3815		4
GO:0039530	MDA-5 signaling pathway	9		4	44.4444	2.53	0.22751	3363		0.19213	1537		4	44.4444	1.71	0.07333	2134		0.0948	929		4	44.4444	0.3	0.00013	193		0.00313	69		2	22.2222	0.15	0.0096	364		0.05002	173		4	44.4444	2.56	0.23605	3351		0.19693	1572		4
GO:0044346	fibroblast apoptotic process	20		7	35	5.61	0.31946	3776		0.19213	1538		4	20	3.81	0.54547	4669		0.46926	2870		0	0	0.66	1	6499		1	3516		1	5	0.34	0.29089	1925		0.29089	833		6	30	5.69	0.52363	4775		0.63399	3821		6
GO:0046545	development of primary female sexual characteristics	74		22	29.7297	20.77	0.41826	4254		0.19215	1539		16	21.6216	14.08	0.32811	3779		0.469	2822		5	6.75676	2.43	0.09552	1197		0.0949	391		0	0	1.26	1	6283		1	2215		23	31.0811	21.07	0.34975	3853		0.19688	1563		19
GO:1903524	positive regulation of blood circulation	42		13	30.9524	11.79	0.39465	4073		0.19215	1540		9	21.4286	7.99	0.4059	4083		1	7466		3	7.14286	1.38	0.1585	1516		0.46876	1478		NA	NA	NA	NA	NA		NA	7841		15	35.7143	11.96	0.19017	3090		0.19678	1551		14
GO:0071415	cellular response to purine-containing compound	10		4	40	2.81	0.29976	3611		0.19215	1541		3	30	1.9	0.29315	3482		0.09488	936		0	0	0.33	1	7383		1	2473		1	10	0.17	0.15786	1291		0.15786	523		3	30	2.85	0.57539	5131		0.63401	3824		4
GO:1904779	regulation of protein localization to centrosome	10		4	40	2.81	0.29976	3612		0.19215	1542		2	20	1.9	0.59436	4825		0.59436	3253		NA	NA	NA	NA	NA		NA	NA		NA	NA	NA	NA	NA		NA	7842		4	40	2.85	0.30997	3644		0.19696	1578		4
GO:0043558	regulation of translational initiation in response to stress	14		5	35.7143	3.93	0.35323	3883		0.19216	1543		4	28.5714	2.66	0.26891	3379		0.09487	934		1	7.14286	0.46	0.37336	2724		1	2471		1	7.14286	0.24	0.21382	1595		1	2216		4	28.5714	3.99	0.59665	5229		0.63402	3828		5
GO:0010712	regulation of collagen metabolic process	32		10	31.25	8.98	0.40874	4203		0.19217	1544		8	25	6.09	0.25368	3338		0.469	2823		1	3.125	1.05	0.65667	3687		0.65667	1795		2	6.25	0.54	0.10267	985		0.31388	859		10	31.25	9.11	0.42841	4213		0.19698	1579		9
GO:0032098	regulation of appetite	11		4	36.3636	3.09	0.37402	3970		0.19218	1545		1	9.09091	2.09	0.90205	6787		1	6482		0	0	0.36	1	5894		1	6147		0	0	0.19	1	5297		1	2217		4	36.3636	3.13	0.38552	3966		0.19699	1581		2
GO:0030252	growth hormone secretion	11		4	36.3636	3.09	0.37402	3971		0.19218	1546		3	27.2727	2.09	0.35048	3876		0.46915	2852		1	9.09091	0.36	0.30732	2351		0.30732	1124		0	0	0.19	1	5119		1	2218		5	45.4545	3.13	0.17775	2988		0.19689	1564		3
GO:0046322	negative regulation of fatty acid oxidation	8		3	37.5	2.25	0.39912	4082		0.19219	1547		2	25	1.52	0.46799	4387		0.46922	2859		0	0	0.26	1	6675		1	3506		0	0	0.14	1	6247		1	2219		3	37.5	2.28	0.40919	4080		0.197	1582		4
GO:0070561	vitamin D receptor signaling pathway	8		3	37.5	2.25	0.39912	4083		0.19219	1548		2	25	1.52	0.46799	4338		0.46799	2734		0	0	0.26	1	7306		1	3421		0	0	0.14	1	7038		1	2220		4	50	2.28	0.16716	2922		0.1969	1566		3
GO:0014831	gastro-intestinal system smooth muscle contraction	8		3	37.5	2.25	0.39912	4084		0.19219	1549		1	12.5	1.52	0.81539	6194		0.81539	4434		0	0	0.26	1	5500		1	4508		0	0	0.14	1	4804		1	2221		3	37.5	2.28	0.40919	4081		0.197	1583		4
GO:0034698	response to gonadotropin	19		6	31.5789	5.33	0.4513	4539		0.1922	1550		3	15.7895	3.62	0.7301	5739		0.46939	2885		1	5.26316	0.62	0.46977	3074		1	3528		0	0	0.32	1	5593		1	2222		6	31.5789	5.41	0.46675	4531		0.19701	1585		3
GO:0015669	gas transport	16		5	31.25	4.49	0.48143	4612		0.19222	1551		7	43.75	3.05	0.02052	1508		1	7111		0	0	0.53	1	5522		1	6718		3	18.75	0.27	0.00232	214		1	2223		6	37.5	4.55	0.29064	3559		0.19693	1573		2
GO:0097340	inhibition of cysteine-type endopeptidase activity	9		3	33.3333	2.53	0.48493	4641		0.19222	1552		3	33.3333	1.71	0.23652	3122		0.4691	2835		0	0	0.3	1	7666		1	3488		0	0	0.15	1	7492		1	2224		5	55.5556	2.56	0.08105	2295		0.02305	476		3
GO:0043267	negative regulation of potassium ion transport	20		6	30	5.61	0.5078	4745		0.19223	1553		6	30	3.81	0.16516	2758		0.09481	930		0	0	0.66	1	6423		1	2468		0	0	0.34	1	5937		1	2225		8	40	5.69	0.18313	3056		0.19685	1560		6
GO:1905114	cell surface receptor signaling pathway involved in cell-cell signaling	430		121	28.1395	120.71	0.50629	4742		0.19224	1554		75	17.4419	81.84	0.81997	6290		0.09547	939		12	2.7907	14.11	0.75786	4002		1	2475		7	1.62791	7.32	0.60185	2920		1	2226		109	25.3488	122.41	0.936	7241		0.19838	1596		115
GO:0035627	ceramide transport	10		3	30	2.81	0.56429	5032		0.19225	1555		3	30	1.9	0.29315	3531		0.46913	2844		1	10	0.33	0.2838	2303		1	3495		0	0	0.17	1	5672		1	2227		2	20	2.85	0.82543	6430		0.63413	3850		3
GO:0002645	positive regulation of tolerance induction	10		3	30	2.81	0.56429	5033		0.19225	1556		3	30	1.9	0.29315	3483		0.09488	937		2	20	0.33	0.04061	868		0.04061	246		0	0	0.17	1	4009		1	2228		3	30	2.85	0.57539	5088		0.19705	1587		3
GO:0010639	negative regulation of organelle organization	335		94	28.0597	94.04	0.5233	4810		0.19227	1557		62	18.5075	63.76	0.6202	4969		0.46957	2897		5	1.49254	10.99	0.98686	4632		1	3539		1	0.298507	5.7	0.99706	3730		1	2229		97	28.9552	95.37	0.44146	4441		0.19691	1568		90
GO:0003170	heart valve development	36		10	27.7778	10.11	0.57864	5121		0.19227	1558		5	13.8889	6.85	0.84186	6373		1	6733		1	2.77778	1.18	0.69968	3826		0.69968	1854		0	0	0.61	1	4081		1	2230		11	30.5556	10.25	0.45249	4477		0.197	1584		8
GO:0031440	regulation of mRNA 3'-end processing	27		7	25.9259	7.58	0.66864	5482		0.19232	1559		1	3.7037	5.14	0.99668	7542		1	5506		0	0	0.89	1	5841		1	5258		0	0	0.46	1	5238		1	2231		5	18.5185	7.69	0.91863	7083		0.63435	3869		7
GO:0036303	lymph vessel morphogenesis	13		3	23.0769	3.65	0.7525	5884		0.19233	1560		2	15.3846	2.47	0.73946	5773		0.46937	2883		0	0	0.43	1	6273		1	3526		0	0	0.22	1	5752		1	2232		3	23.0769	3.7	0.76226	5964		0.19713	1588		2
GO:0001754	eye photoreceptor cell differentiation	24		6	25	6.74	0.70452	5635		0.19233	1561		3	12.5	4.57	0.86228	6513		0.46953	2893		1	4.16667	0.79	0.55137	3363		1	3535		0	0	0.41	1	3861		1	2233		6	25	6.83	0.71908	5847		0.19715	1590		3
GO:0007173	epidermal growth factor receptor signaling pathway	103		47	45.6311	28.91	0.0001	582		0.19238	1562		30	29.1262	19.6	0.00848	1224		0.19528	1516		6	5.82524	3.38	0.12273	1323		0.63061	1761		2	1.94175	1.75	0.52617	2723		0.40334	987		43	41.7476	29.32	0.00255	947		0.64888	4057		46
GO:0032205	negative regulation of telomere maintenance	33		8	24.2424	9.26	0.74785	5872		0.19238	1563		5	15.1515	6.28	0.78007	6055		1	6981		2	6.06061	1.08	0.29524	2321		1	6598		0	0	0.56	1	5305		1	2234		7	21.2121	9.39	0.87018	6767		0.63431	3868		7
GO:0016056	rhodopsin mediated signaling pathway	19		4	21.0526	5.33	0.82436	6374		0.19239	1564		2	10.5263	3.62	0.90118	6717		0.46954	2894		0	0	0.62	1	5570		1	3536		0	0	0.32	1	4878		1	2235		4	21.0526	5.41	0.83382	6498		0.1972	1591		3
GO:0050954	sensory perception of mechanical stimulus	103		25	24.2718	28.91	0.83431	6412		0.19264	1565		15	14.5631	19.6	0.90432	6797		0.47	2899		4	3.8835	3.38	0.439	2966		1	3541		4	3.8835	1.75	0.09895	973		0.17117	555		25	24.2718	29.32	0.85528	6572		0.19748	1593		24
GO:0010833	telomere maintenance via telomere lengthening	76		15	19.7368	21.34	0.96388	7417		0.19286	1566		8	10.5263	14.46	0.98497	7386		1	6892		1	1.31579	2.49	0.92141	4451		1	6511		0	0	1.29	1	4738		1	2236		15	19.7368	21.64	0.96937	7524		0.1977	1594		14
GO:0045860	positive regulation of protein kinase activity	430		153	35.5814	120.71	0.00034	675		0.19434	1567		102	23.7209	81.84	0.00814	1195		0.40231	2526		23	5.34884	14.11	0.01488	602		1	3312		5	1.16279	7.32	0.86105	3458		1	2237		145	33.7209	122.41	0.0089	1289		0.34692	2477		145
GO:0008219	cell death	1725		607	35.1884	484.26	2.5e-12	117		0.19552	1568		426	24.6957	328.31	2.3e-10	143		0.12049	1021		71	4.11594	56.61	0.02434	729		1	2504		43	2.49275	29.37	0.00604	311		1	2238		603	34.9565	491.06	1.7e-10	132		0.62429	3709		592
GO:0071108	protein K48-linked deubiquitination	30		11	36.6667	8.42	0.19657	3127		0.19657	1569		4	13.3333	5.71	0.84971	6391		0.84971	4560		1	3.33333	0.98	0.63292	3607		0.63292	1769		0	0	0.51	1	7101		1	2239		9	30	8.54	0.49473	4611		0.49473	3242		11
[truncated: 6,179 more rows]
[truncated: 13 more columns]
