# Supplementary material for: Neutrophil degranulation, NETosis and platelet degranulation pathway genes are co-induced in whole blood up to six months before tuberculosis diagnosis
Source: PLoS One. 2022 Dec 1;17(12):e0278295. doi: 10.1371/journal.pone.0278295 (PMC9714760; doi:10.1371/journal.pone.0278295)
Supplement: S4 Table — The analysis was performed using the kegga function from the edgeR R Bioconductor package. The statistical metrics presented for each pathway include: the total number of genes annotated to the pathway (Total annotated), the number of genes that were significantly up (N Up) or down (N Down) -regulated, the % of the total annotated that were up (% Up) or down (% Down) -regulated and the uncorrected Fisher’s exact test p-value (Pvalue) for up and down comparisons (P Up, P Down) for over-representation of the KEGG pathway in the set. (XLSX) [file pone.0278295.s004.xlsx]

## Sheet: KEGG Enrichment
			TB (Catalysis; 9,205 DE genes)								Six months before (5,131 DE genes)								Twelve months before (742 DE genes)								Eighteen months before (278 DE genes )								TB high PET-score vs control (9,211 DE genes)								TB low PET-score vs control (8,496 DE genes)
			Up				Down				Up				Down				Up				Down				Up				Down				Up				Down				Up				Down
KEGG ID	Pathway Name	Total annotated	N Up	% Up	P Up		N Down	% Down	P Down		N Up	% Up	P Up		N Down	% Down	P Down		N Up	% Up	P Up		N Down	% Down	P Down		N Up	% Up	P Up		N Down	% Down	P Down		N Up	% Up	P Up		N Down	% Down	P Down		N Up	% Up	P Up		N Down	% Down	P Down
hsa04613	Neutrophil extracellular trap formation	142	97	68.3099	7.3521e-26		11	7.74648	1		62	43.662	2.97042e-13		4	2.8169	1		11	7.74648	0.00445546		1	0.704225	0.894221		0	0	1		0	0	1		91	64.0845	1.20073e-20		9	6.33803	1		100	70.4225	7.04925e-30		9	6.33803	1
hsa05152	Tuberculosis	144	87	60.4167	1.44748e-17		23	15.9722	0.999996		65	45.1389	1.30996e-14		15	10.4167	0.951552		11	7.63889	0.00610623		1	0.694444	0.904274		2	1.38889	0.638405		0	0	1		84	58.3333	2.96006e-15		21	14.5833	0.999999		85	59.0278	1.78922e-17		22	15.2778	0.999939
hsa04145	Phagosome	131	80	61.0687	4.98488e-17		15	11.4504	1		66	50.3817	6.92634e-18		3	2.29008	1		13	9.92366	0.000232205		0	0	1		2	1.52672	0.638799		0	0	1		80	61.0687	2.01307e-16		17	12.9771	1		77	58.7786	3.14025e-16		12	9.16031	1
hsa04142	Lysosome	127	78	61.4173	2.08982e-16		16	12.5984	1		55	43.3071	8.28359e-12		7	5.51181	0.999709		15	11.811	1.57677e-05		0	0	1		8	6.29921	0.000600238		0	0	1		77	60.6299	2.59814e-15		17	13.3858	0.999999		79	62.2047	3.7871e-18		15	11.811	0.999998
hsa04621	NOD-like receptor signaling pathway	151	87	57.6159	1.41265e-15		20	13.245	1		70	46.3576	2.97328e-16		14	9.27152	0.984861		22	14.5695	2.18001e-09		2	1.3245	0.701096		11	7.28477	1.27525e-05		0	0	1		87	57.6159	3.01505e-15		17	11.2583	1		88	58.2781	2.01069e-17		18	11.9205	1
hsa05132	Salmonella infection	235	114	48.5106	4.74775e-13		50	21.2766	0.999906		85	36.1702	5.3594e-12		23	9.78723	0.991708		9	3.82979	0.327063		0	0	1		8	3.40426	0.0235575		0	0	1		118	50.2128	3.27135e-14		47	20	0.99997		112	47.6596	1.94602e-13		44	18.7234	0.999821
hsa05020	Prion disease	243	112	46.0905	1.44694e-12		29	11.9342	1		110	45.2675	7.68475e-24		11	4.52675	1		7	2.88066	0.56411		0	0	1		6	2.46914	0.337314		0	0	1		124	51.0288	7.91262e-17		25	10.2881	1		106	43.6214	1.67087e-11		23	9.46502	1
hsa04144	Endocytosis	237	114	48.1013	1.89824e-12		33	13.9241	1		74	31.2236	1.34542e-07		17	7.173	0.999911		9	3.79747	0.350273		3	1.26582	0.745657		3	1.26582	0.638447		1	0.421941	0.338616		111	46.8354	7.39151e-11		36	15.1899	1		110	46.4135	5.34557e-12		31	13.0802	1
hsa04380	Osteoclast differentiation	116	67	57.7586	1.90984e-12		20	17.2414	0.999908		53	45.6897	1.94134e-12		9	7.75862	0.992868		6	5.17241	0.16796		0	0	1		7	6.03448	0.00135615		0	0	1		64	55.1724	2.2967e-10		21	18.1034	0.999638		69	59.4828	1.62521e-14		14	12.069	0.999995
hsa04666	Fc gamma R-mediated phagocytosis	92	57	61.9565	2.29215e-12		17	18.4783	0.999087		36	39.1304	9.86446e-07		5	5.43478	0.998741		9	9.78261	0.00280381		1	1.08696	0.781653		1	1.08696	0.71079		0	0	1		55	59.7826	7.07943e-11		13	14.1304	0.999971		59	64.1304	1.77667e-14		15	16.3043	0.998449
hsa05169	Epstein-Barr virus infection	179	91	50.838	2.60969e-12		29	16.2011	0.999999		75	41.8994	1.71019e-14		15	8.37989	0.996708		14	7.82123	0.00153024		0	0	1		10	5.58659	0.00047539		0	0	1		88	49.162	2.2595e-10		31	17.3184	0.999993		91	50.838	2.20308e-13		25	13.9665	0.999999
hsa05012	Parkinson disease	240	110	45.8333	2.82885e-12		34	14.1667	1		103	42.9167	2.45925e-20		12	5	1		6	2.5	0.703231		2	0.833333	0.872925		4	1.66667	0.704656		0	0	1		121	50.4167	4.99187e-16		30	12.5	1		101	42.0833	4.28958e-10		28	11.6667	1
hsa05022	Pathways of neurodegeneration - multiple diseases	412	170	41.2621	5.06699e-12		67	16.2621	1		139	33.7379	7.63801e-16		30	7.28155	0.999999		6	1.45631	0.986667		1	0.242718	0.998431		6	1.45631	0.717359		1	0.242718	0.595526		181	43.932	1.311e-14		67	16.2621	1		161	39.0777	7.038e-11		57	13.835	1
hsa05322	Systemic lupus erythematosus	83	50	60.241	9.38231e-12		9	10.8434	0.999992		37	44.5783	9.89105e-09		2	2.40964	0.999973		7	8.43373	0.0101465		0	0	1		4	4.81928	0.0977681		0	0	1		52	62.6506	1.8253e-12		8	9.63855	0.999998		50	60.241	1.37898e-12		8	9.63855	0.999968
hsa05164	Influenza A	138	74	53.6232	1.03667e-11		19	13.7681	1		62	44.9275	6.57836e-14		6	4.34783	0.999982		17	12.3188	1.34963e-06		1	0.724638	0.890047		17	12.3188	3.80592e-11		0	0	1		68	49.2754	2.48727e-08		16	11.5942	1		75	54.3478	3.65666e-13		18	13.0435	0.999995
hsa05208	Chemical carcinogenesis - reactive oxygen species	199	94	47.2362	1.63184e-11		22	11.0553	1		85	42.7136	7.89902e-17		8	4.0201	1		1	0.502513	0.997225		1	0.502513	0.948589		5	2.51256	0.340942		0	0	1		99	49.7487	6.89286e-13		22	11.0553	1		92	46.2312	7.95524e-12		16	8.0402	1
hsa04217	Necroptosis	121	66	54.5455	4.84758e-11		23	19.0083	0.999446		59	48.7603	2.8416e-15		10	8.26446	0.989329		9	7.43802	0.0147636		1	0.826446	0.860698		7	5.78512	0.00269888		0	0	1		68	56.1983	1.04665e-11		21	17.3554	0.999833		67	55.3719	1.96267e-12		23	19.0083	0.993276
hsa01100	Metabolic pathways	1269	431	33.9638	9.44194e-11		312	24.5863	1		307	24.1923	1.45978e-10		141	11.1111	0.999968		37	2.91568	0.681475		15	1.18203	0.907092		20	1.57604	0.612044		0	0	1		447	35.2246	3.83708e-12		310	24.4287	1		414	32.6241	2.16465e-10		274	21.5918	1
hsa05131	Shigellosis	221	103	46.6063	1.21863e-10		43	19.457	0.999991		76	34.3891	9.33477e-10		23	10.4072	0.979062		11	4.97738	0.0952497		1	0.452489	0.973347		3	1.35747	0.629222		0	0	1		100	45.2489	4.00914e-09		41	18.552	0.999995		106	47.9638	5.71844e-13		39	17.6471	0.999946
hsa00190	Oxidative phosphorylation	121	61	50.4132	4.89815e-10		9	7.43802	1		63	52.0661	5.45124e-18		2	1.65289	1		0	0	1		0	0	1		2	1.65289	0.778098		0	0	1		69	57.0248	1.04842e-13		7	5.78512	1		55	45.4545	5.02444e-08		7	5.78512	1
hsa05140	Leishmaniasis	67	42	62.6866	5.5455e-10		7	10.4478	0.99999		33	49.2537	3.23477e-09		4	5.97015	0.992969		5	7.46269	0.0580323		1	1.49254	0.658448		1	1.49254	0.653729		0	0	1		40	59.7015	2.08627e-08		8	11.9403	0.999942		41	61.194	6.98181e-10		7	10.4478	0.999898
hsa05130	Pathogenic Escherichia coli infection	169	82	48.5207	1.68825e-09		32	18.9349	0.999963		60	35.503	1.98349e-08		11	6.50888	0.999753		8	4.73373	0.176603		1	0.591716	0.938774		6	3.5503	0.0323856		0	0	1		79	46.7456	5.80101e-08		28	16.568	0.999997		80	47.3373	1.60166e-09		28	16.568	0.999927
hsa05010	Alzheimer disease	336	136	40.4762	1.92812e-09		56	16.6667	1		123	36.6071	3.32696e-17		24	7.14286	0.999996		6	1.78571	0.940094		0	0	1		4	1.19048	0.845797		1	0.297619	0.528399		151	44.9405	1.68134e-13		57	16.9643	1		135	40.1786	1.97238e-10		50	14.881	1
hsa05014	Amyotrophic lateral sclerosis	326	132	40.4908	2.1146e-09		60	18.4049	1		114	34.9693	1.74936e-14		29	8.89571	0.99952		6	1.84049	0.926442		1	0.306748	0.993416		2	0.613497	0.983151		0	0	1		145	44.4785	9.04415e-13		60	18.4049	1		126	38.6503	7.23278e-09		50	15.3374	1
hsa05203	Viral carcinogenesis	177	84	47.4576	2.15239e-09		33	18.6441	0.999973		59	33.3333	3.24573e-07		12	6.77966	0.999701		7	3.9548	0.317896		2	1.12994	0.775259		6	3.38983	0.0550519		0	0	1		80	45.1977	1.862e-07		36	20.339	0.999606		82	46.3277	1.76725e-09		24	13.5593	0.999999
hsa05016	Huntington disease	272	113	41.5441	2.78493e-09		36	13.2353	1		106	38.9706	3.25004e-17		17	6.25	0.999997		1	0.367647	0.999695		0	0	1		3	1.10294	0.897234		0	0	1		124	45.5882	2.86504e-12		37	13.6029	1		110	40.4412	1.78144e-09		27	9.92647	1
hsa04932	Non-alcoholic fatty liver disease	140	68	48.5714	4.04635e-09		19	13.5714	0.999999		64	45.7143	1.06477e-14		8	5.71429	0.999797		2	1.42857	0.917838		0	0	1		4	2.85714	0.272937		0	0	1		74	52.8571	1.53693e-11		16	11.4286	1		68	48.5714	5.09441e-10		16	11.4286	0.999999
hsa05135	Yersinia infection	128	66	51.5625	4.18518e-09		25	19.5312	0.999616		46	35.9375	6.64705e-07		11	8.59375	0.988253		5	3.90625	0.394547		1	0.78125	0.879845		5	3.90625	0.0274456		0	0	1		63	49.2188	1.5176e-07		25	19.5312	0.999309		69	53.9062	1.63507e-11		22	17.1875	0.999337
hsa05415	Diabetic cardiomyopathy	180	82	45.5556	4.44223e-09		21	11.6667	1		76	42.2222	7.08142e-15		11	6.11111	0.999923		2	1.11111	0.969		1	0.555556	0.932177		1	0.555556	0.970004		0	0	1		87	48.3333	1.57096e-10		20	11.1111	1		81	45	1.12949e-09		17	9.44444	1
hsa05150	Staphylococcus aureus infection	49	32	65.3061	6.38867e-09		4	8.16327	0.999971		27	55.102	3.26482e-09		2	4.08163	0.996215		8	16.3265	9.88664e-05		0	0	1		5	10.2041	0.00231794		0	0	1		32	65.3061	1.39105e-08		3	6.12245	0.999996		32	65.3061	1.89618e-09		3	6.12245	0.999969
hsa05417	Lipid and atherosclerosis	179	84	46.9274	6.6467e-09		34	18.9944	0.999971		61	34.0782	8.47225e-08		16	8.93855	0.993199		11	6.14525	0.0278012		1	0.558659	0.946512		6	3.35196	0.0461437		0	0	1		82	45.8101	8.65709e-08		31	17.3184	0.999995		84	46.9274	8.25419e-10		32	17.8771	0.999702
hsa04610	Complement and coagulation cascades	54	34	62.963	1.8352e-08		7	12.963	0.999572		24	44.4444	4.45068e-06		1	1.85185	0.999828		9	16.6667	4.08952e-05		0	0	1		6	11.1111	0.00023775		0	0	1		33	61.1111	1.47122e-07		6	11.1111	0.999862		33	61.1111	2.82999e-08		5	9.25926	0.999834
hsa04062	Chemokine signaling pathway	159	74	46.5409	6.64016e-08		28	17.6101	0.999986		53	33.3333	1.36013e-06		11	6.91824	0.999341		9	5.66038	0.062208		3	1.88679	0.464664		6	3.77358	0.0309093		1	0.628931	0.256575		72	45.283	7.72858e-07		34	21.3836	0.99814		75	47.1698	4.15335e-09		23	14.4654	0.999991
hsa05034	Alcoholism	124	60	48.3871	8.93075e-08		22	17.7419	0.999786		38	30.6452	0.000269002		3	2.41935	0.999999		3	2.41935	0.735389		2	1.6129	0.576747		1	0.806452	0.882207		1	0.806452	0.23401		59	47.5806	5.75836e-07		20	16.129	0.999948		59	47.5806	4.76034e-08		16	12.9032	0.99998
hsa05160	Hepatitis C	124	61	49.1935	1.16771e-07		17	13.7097	0.999999		48	38.7097	2.34294e-08		8	6.45161	0.998811		13	10.4839	0.000164049		1	0.806452	0.869214		14	11.2903	1.80401e-09		0	0	1		56	45.1613	1.77458e-05		20	16.129	0.999974		63	50.8065	2.97795e-09		14	11.2903	0.999999
hsa05170	Human immunodeficiency virus 1 infection	184	82	44.5652	1.55413e-07		47	25.5435	0.977006		62	33.6957	1.17546e-07		22	11.9565	0.890628		9	4.8913	0.12747		1	0.543478	0.949476		4	2.17391	0.282193		2	1.08696	0.0445047		80	43.4783	1.56352e-06		43	23.3696	0.993767		81	44.0217	5.58898e-08		41	22.2826	0.978428
hsa05163	Human cytomegalovirus infection	189	83	43.9153	3.26887e-07		39	20.6349	0.999842		59	31.2169	3.99628e-06		14	7.40741	0.99943		7	3.7037	0.380841		0	0	1		4	2.1164	0.283321		1	0.529101	0.288115		83	43.9153	6.7897e-07		37	19.5767	0.99992		84	44.4444	2.26149e-08		31	16.4021	0.999974
hsa05133	Pertussis	66	37	56.0606	3.51685e-07		11	16.6667	0.998135		27	40.9091	8.0386e-06		4	6.06061	0.992074		8	12.1212	0.00105414		0	0	1		7	10.6061	9.0031e-05		0	0	1		35	53.0303	6.74559e-06		10	15.1515	0.999129		35	53.0303	1.44347e-06		10	15.1515	0.995795
hsa04611	Platelet activation	105	53	50.4762	3.815e-07		17	16.1905	0.999956		27	25.7143	0.0249347		7	6.66667	0.996945		5	4.7619	0.246338		1	0.952381	0.822449		0	0	1		0	0	1		50	47.619	1.0192e-05		17	16.1905	0.999918		55	52.381	1.12297e-08		15	14.2857	0.999896
hsa04620	Toll-like receptor signaling pathway	84	44	52.381	6.76538e-07		9	10.7143	0.999999		35	41.6667	2.43899e-07		5	5.95238	0.996812		7	8.33333	0.0177164		0	0	1		6	7.14286	0.00119888		0	0	1		45	53.5714	3.47534e-07		9	10.7143	0.999998		45	53.5714	6.20433e-08		9	10.7143	0.999983
hsa05100	Bacterial invasion of epithelial cells	71	39	54.9296	6.91609e-07		12	16.9014	0.998955		21	29.5775	0.00936202		3	4.22535	0.999009		2	2.8169	0.67415		0	0	1		1	1.40845	0.623307		0	0	1		39	54.9296	1.03122e-06		13	18.3099	0.996236		38	53.5211	7.99775e-07		11	15.493	0.997326
hsa04670	Leukocyte transendothelial migration	89	46	51.6854	7.10191e-07		18	20.2247	0.995966		27	30.3371	0.00252656		11	12.3596	0.790248		2	2.24719	0.778888		2	2.24719	0.422009		0	0	1		0	0	1		43	48.3146	2.21957e-05		18	20.2247	0.994118		45	50.5618	6.49118e-07		18	20.2247	0.975988
hsa04662	B cell receptor signaling pathway	77	41	53.2468	9.32376e-07		22	28.5714	0.786376		24	31.1688	0.0027612		15	19.4805	0.16022		5	6.49351	0.0965931		0	0	1		3	3.8961	0.0946871		0	0	1		39	50.6494	1.26698e-05		23	29.8701	0.665665		43	55.8442	2.47821e-08		20	25.974	0.744902
hsa05162	Measles	119	57	47.8992	9.89361e-07		24	20.1681	0.998881		44	36.9748	4.70526e-07		13	10.9244	0.916098		13	10.9244	0.000105957		0	0	1		13	10.9244	8.50066e-09		1	0.840336	0.184123		52	43.6975	0.000103247		23	19.3277	0.999098		60	50.4202	1.11822e-08		22	18.4874	0.996758
hsa05167	Kaposi sarcoma-associated herpesvirus infection	165	73	44.2424	1.09647e-06		39	23.6364	0.993179		56	33.9394	3.69046e-07		18	10.9091	0.943803		8	4.84848	0.150118		1	0.606061	0.931116		7	4.24242	0.0103576		1	0.606061	0.260384		74	44.8485	9.66984e-07		39	23.6364	0.9894		73	44.2424	2.10071e-07		33	20	0.995761
hsa04714	Thermogenesis	209	84	40.1914	1.77075e-06		34	16.2679	0.999999		78	37.3206	6.51617e-12		16	7.6555	0.999486		2	0.956938	0.984824		2	0.956938	0.815361		3	1.43541	0.763718		0	0	1		92	44.0191	1.21143e-08		38	18.1818	0.99998		79	37.799	1.03088e-05		28	13.3971	0.999999
hsa05418	Fluid shear stress and atherosclerosis	117	55	47.0085	1.8893e-06		21	17.9487	0.999769		41	35.0427	4.84438e-06		7	5.98291	0.99916		4	3.4188	0.505989		0	0	1		6	5.12821	0.00910357		1	0.854701	0.20153		55	47.0085	3.51783e-06		21	17.9487	0.999644		56	47.8632	1.74736e-07		20	17.094	0.998464
hsa05161	Hepatitis B	143	65	45.4545	2.33359e-06		27	18.8811	0.999912		45	31.4685	4.48939e-05		14	9.79021	0.972366		8	5.59441	0.0885824		1	0.699301	0.905164		6	4.1958	0.010655		0	0	1		64	44.7552	8.18643e-06		27	18.8811	0.999824		66	46.1538	2.3035e-07		21	14.6853	0.999984
hsa05134	Legionellosis	55	31	56.3636	3.37217e-06		5	9.09091	0.999987		26	47.2727	3.69354e-07		2	3.63636	0.998378		4	7.27273	0.101969		0	0	1		2	3.63636	0.201167		0	0	1		28	50.9091	0.000165852		3	5.45455	1		31	56.3636	1.31559e-06		5	9.09091	0.999899
hsa05110	Vibrio cholerae infection	43	25	58.1395	1.0284e-05		7	16.2791	0.992484		20	46.5116	1.16117e-05		4	9.30233	0.896939		2	4.65116	0.380824		1	2.32558	0.49081		0	0	1		0	0	1		25	58.1395	1.58739e-05		8	18.6047	0.977306		24	55.814	1.84801e-05		7	16.2791	0.975423
hsa04140	Autophagy - animal	132	59	44.697	1.04891e-05		25	18.9394	0.999809		44	33.3333	1.01534e-05		17	12.8788	0.771953		5	3.78788	0.417131		0	0	1		2	1.51515	0.536861		1	0.757576	0.201917		65	49.2424	8.73878e-08		27	20.4545	0.998554		60	45.4545	1.18341e-06		21	15.9091	0.999841
hsa05202	Transcriptional misregulation in cancer	152	65	42.7632	1.60612e-05		38	25	0.976651		38	25	0.0138033		19	12.5	0.819185		9	5.92105	0.052585		3	1.97368	0.443417		4	2.63158	0.180522		1	0.657895	0.243144		63	41.4474	0.000115494		33	21.7105	0.997209		63	41.4474	1.83525e-05		33	21.7105	0.978751
hsa03050	Proteasome	46	25	54.3478	1.8998e-05		1	2.17391	1		24	52.1739	9.96507e-08		0	0	1		0	0	1		0	0	1		1	2.17391	0.639417		0	0	1		31	67.3913	4.34301e-09		1	2.17391	1		25	54.3478	7.52823e-06		0	0	1
hsa05200	Pathways in cancer	424	152	35.8491	3.75783e-05		108	25.4717	0.999164		98	23.1132	0.00247319		53	12.5	0.928222		13	3.06604	0.590954		7	1.65094	0.528967		7	1.65094	0.363083		3	0.707547	0.0356717		150	35.3774	0.000192803		114	26.8868	0.986041		152	35.8491	3.26815e-06		96	22.6415	0.998569
hsa05323	Rheumatoid arthritis	76	36	47.3684	4.26508e-05		16	21.0526	0.97915		33	43.4211	1.4008e-07		6	7.89474	0.976214		5	6.57895	0.0786849		1	1.31579	0.690643		4	5.26316	0.0514947		0	0	1		35	46.0526	0.00020158		15	19.7368	0.988203		33	43.4211	0.000274229		16	21.0526	0.918682
hsa04210	Apoptosis	127	55	43.3071	4.40908e-05		30	23.622	0.985184		42	33.0709	1.82142e-05		18	14.1732	0.615142		6	4.72441	0.215531		1	0.787402	0.873854		6	4.72441	0.0110373		0	0	1		53	41.7323	0.000309411		30	23.622	0.979399		56	44.0945	5.68335e-06		27	21.2598	0.976096
hsa04926	Relaxin signaling pathway	101	46	45.5446	4.69263e-05		20	19.802	0.998065		25	24.7525	0.0463341		9	8.91089	0.972853		4	3.9604	0.394711		0	0	1		1	0.990099	0.761185		2	1.9802	0.0135964		44	43.5644	0.000345183		19	18.8119	0.998632		46	45.5446	1.61556e-05		17	16.8317	0.998164
hsa05145	Toxoplasmosis	99	45	45.4545	5.05015e-05		16	16.1616	0.999893		37	37.3737	2.53429e-06		12	12.1212	0.815238		3	3.0303	0.611632		1	1.0101	0.800655		1	1.0101	0.77361		0	0	1		45	45.4545	7.95451e-05		18	18.1818	0.999004		43	43.4343	9.79594e-05		15	15.1515	0.999439
hsa05146	Amoebiasis	75	36	48	5.45767e-05		15	20	0.991418		20	26.6667	0.0336375		7	9.33333	0.941157		1	1.33333	0.90422		1	1.33333	0.693527		2	2.66667	0.332279		1	1.33333	0.138532		33	44	0.00118414		16	21.3333	0.978598		35	46.6667	5.76477e-05		14	18.6667	0.979402
hsa05120	Epithelial cell signaling in Helicobacter pylori infection	61	31	50.8197	5.49432e-05		10	16.3934	0.998174		26	42.623	4.93828e-06		6	9.83607	0.906662		2	3.27869	0.582986		1	1.63934	0.631122		2	3.27869	0.22991		0	0	1		31	50.8197	7.80571e-05		9	14.7541	0.999151		30	49.1803	7.00248e-05		9	14.7541	0.996359
hsa04810	Regulation of actin cytoskeleton	175	71	40.5714	8.84425e-05		37	21.1429	0.999683		44	25.1429	0.00869922		14	8	0.998043		4	2.28571	0.808055		0	0	1		1	0.571429	0.899349		1	0.571429	0.248875		70	40	0.000247698		38	21.7143	0.998824		72	41.1429	1.18994e-05		31	17.7143	0.999822
hsa05142	Chagas disease	87	40	45.977	0.000100915		17	19.5402	0.996834		27	31.0345	0.00162341		6	6.89655	0.992524		6	6.89655	0.0586133		1	1.14943	0.758601		6	6.89655	0.00162824		0	0	1		39	44.8276	0.000344859		16	18.3908	0.997982		41	47.1264	1.50224e-05		17	19.5402	0.980512
hsa04625	C-type lectin receptor signaling pathway	91	41	45.0549	0.000159656		23	25.2747	0.938927		33	36.2637	1.89337e-05		15	16.4835	0.374776		8	8.79121	0.00810964		0	0	1		5	5.49451	0.00912606		2	2.1978	0.0111294		39	42.8571	0.00106741		23	25.2747	0.92175		43	47.2527	9.72202e-06		21	23.0769	0.908513
hsa00480	Glutathione metabolism	47	24	51.0638	0.000160102		6	12.766	0.99881		21	44.6809	1.47985e-05		2	4.25532	0.994974		5	10.6383	0.0127391		0	0	1		4	8.51064	0.0126951		0	0	1		23	48.9362	0.000770988		6	12.766	0.998713		24	51.0638	7.35269e-05		6	12.766	0.994687
hsa05221	Acute myeloid leukemia	63	31	49.2063	0.000163686		11	17.4603	0.997584		22	34.9206	0.000836084		7	11.1111	0.848045		3	4.7619	0.32912		0	0	1		2	3.1746	0.201808		0	0	1		30	47.619	0.000540805		12	19.0476	0.99171		34	53.9683	2.55026e-06		9	14.2857	0.998149
hsa03320	PPAR signaling pathway	57	28	49.1228	0.000219266		8	14.0351	0.999372		17	29.8246	0.0167767		3	5.26316	0.993692		2	3.50877	0.53942		0	0	1		1	1.75439	0.596903		0	0	1		27	47.3684	0.000827495		9	15.7895	0.997548		26	45.614	0.00076624		5	8.77193	0.99993
hsa04721	Synaptic vesicle cycle	55	27	49.0909	0.000288208		8	14.5455	0.998958		20	36.3636	0.000741658		1	1.81818	0.999855		2	3.63636	0.516223		1	1.81818	0.585851		1	1.81818	0.584121		0	0	1		29	52.7273	4.86169e-05		7	12.7273	0.999607		25	45.4545	0.00102871		7	12.7273	0.998233
hsa04137	Mitophagy - animal	69	32	46.3768	0.000352362		11	15.942	0.999193		23	33.3333	0.00126541		4	5.7971	0.994533		2	2.89855	0.648589		0	0	1		1	1.44928	0.651883		1	1.44928	0.123243		32	46.3768	0.00049518		12	17.3913	0.997105		31	44.9275	0.000395755		9	13.0435	0.9993
hsa04668	TNF signaling pathway	102	44	43.1373	0.000356883		20	19.6078	0.998587		34	33.3333	0.000103267		9	8.82353	0.975271		5	4.90196	0.2285		1	0.980392	0.813428		4	3.92157	0.0485134		0	0	1		44	43.1373	0.000492803		18	17.6471	0.999553		46	45.098	2.64632e-05		17	16.6667	0.99865
hsa05235	PD-L1 expression and PD-1 checkpoint pathway in cancer	85	38	44.7059	0.000390327		25	29.4118	0.758199		27	31.7647	0.0012049		14	16.4706	0.385275		4	4.70588	0.290481		1	1.17647	0.753617		3	3.52941	0.10225		0	0	1		38	44.7059	0.000515518		26	30.5882	0.627072		39	45.8824	6.97592e-05		23	27.0588	0.692824
hsa00052	Galactose metabolism	25	15	60	0.000493812		2	8	0.999171		7	28	0.136403		2	8	0.901965		1	4	0.557228		1	4	0.336847		0	0	1		0	0	1		14	56	0.00233415		2	8	0.999013		15	60	0.00030582		2	8	0.997553
hsa05321	Inflammatory bowel disease	51	25	49.0196	0.000499946		15	29.4118	0.686351		21	41.1765	7.41358e-05		7	13.7255	0.650248		2	3.92157	0.476128		1	1.96078	0.558348		1	1.96078	0.556165		0	0	1		23	45.098	0.00433316		14	27.451	0.763487		24	47.0588	0.000710188		12	23.5294	0.816705
hsa04979	Cholesterol metabolism	33	18	54.5455	0.000522		4	12.1212	0.997395		14	42.4242	0.000750134		1	3.0303	0.994856		3	9.09091	0.0798391		1	3.0303	0.405423		2	6.06061	0.106289		0	0	1		18	54.5455	0.000711559		6	18.1818	0.968046		16	48.4848	0.00323578		3	9.09091	0.998126
hsa04722	Neurotrophin signaling pathway	103	44	42.7184	0.000536572		24	23.301	0.984916		30	29.1262	0.00301296		13	12.6214	0.78001		6	5.82524	0.109719		2	1.94175	0.497464		0	0	1		0	0	1		42	40.7767	0.00272337		25	24.2718	0.962973		45	43.6893	0.000100745		20	19.4175	0.99117
hsa04935	Growth hormone synthesis, secretion and action	97	42	43.299	0.000544689		21	21.6495	0.993883		20	20.6186	0.26581		10	10.3093	0.927143		3	3.09278	0.592571		1	1.03093	0.791508		2	2.06186	0.335467		0	0	1		40	41.2371	0.00280536		21	21.6495	0.990624		43	44.3299	0.000104738		17	17.5258	0.997347
hsa04612	Antigen processing and presentation	67	30	44.7761	0.000736696		14	20.8955	0.977913		28	41.791	2.97616e-06		4	5.97015	0.992616		3	4.47761	0.345313		0	0	1		3	4.47761	0.114604		0	0	1		28	41.791	0.00553953		14	20.8955	0.974792		29	43.2836	0.00081669		13	19.403	0.956036
hsa04630	JAK-STAT signaling pathway	111	46	41.4414	0.00074372		31	27.9279	0.862532		31	27.9279	0.0051013		12	10.8108	0.914404		4	3.6036	0.467254		1	0.900901	0.835313		3	2.7027	0.190711		0	0	1		48	43.2432	0.000254375		30	27.027	0.875481		44	39.6396	0.00121031		27	24.3243	0.880697
hsa04066	HIF-1 signaling pathway	97	41	42.268	0.000748662		17	17.5258	0.999601		25	25.7732	0.0296233		9	9.27835	0.961823		2	2.06186	0.811233		2	2.06186	0.457732		1	1.03093	0.754951		0	0	1		39	40.2062	0.0040648		16	16.4948	0.999752		42	43.299	0.000140558		14	14.433	0.999701
hsa05166	Human T-cell leukemia virus 1 infection	203	75	36.9458	0.000798583		57	28.0788	0.888986		63	31.0345	1.76293e-06		28	13.7931	0.690495		2	0.985222	0.988153		2	0.985222	0.834579		4	1.97044	0.378366		0	0	1		75	36.9458	0.0014178		55	27.0936	0.915444		74	36.4532	0.0003823		50	24.6305	0.898855
hsa04912	GnRH signaling pathway	73	33	45.2055	0.000799926		14	19.1781	0.996382		18	24.6575	0.0855615		8	10.9589	0.869236		2	2.73973	0.681222		0	0	1		2	2.73973	0.237274		1	1.36986	0.110001		31	42.4658	0.00460647		15	20.5479	0.988612		32	43.8356	0.000912039		14	19.1781	0.981415
hsa04064	NF-kappa B signaling pathway	97	41	42.268	0.000823089		21	21.6495	0.992074		29	29.8969	0.00227963		16	16.4948	0.368263		5	5.15464	0.19751		2	2.06186	0.468068		2	2.06186	0.391674		0	0	1		41	42.268	0.001128		24	24.7423	0.942646		40	41.2371	0.000738662		20	20.6186	0.974053
hsa04936	Alcoholic liver disease	112	46	41.0714	0.000855856		25	22.3214	0.992011		32	28.5714	0.00299017		14	12.5	0.794734		5	4.46429	0.286022		1	0.892857	0.840471		6	5.35714	0.00494648		0	0	1		46	41.0714	0.00121662		20	17.8571	0.999654		47	41.9643	0.000161866		22	19.6429	0.989836
hsa05207	Chemical carcinogenesis - receptor activation	139	55	39.5683	0.000887318		30	21.5827	0.998046		32	23.0216	0.065976		12	8.63309	0.990039		2	1.43885	0.935353		0	0	1		4	2.8777	0.123943		0	0	1		56	40.2878	0.000707753		31	22.3022	0.99428		53	38.1295	0.00114248		27	19.4245	0.99597
hsa04650	Natural killer cell mediated cytotoxicity	99	41	41.4141	0.000972897		26	26.2626	0.901811		35	35.3535	1.80332e-05		8	8.08081	0.984818		3	3.0303	0.603482		1	1.0101	0.796729		1	1.0101	0.78836		0	0	1		39	39.3939	0.00538059		27	27.2727	0.832222		40	40.404	0.000841487		23	23.2323	0.894256
hsa04928	Parathyroid hormone synthesis, secretion and action	88	38	43.1818	0.000995103		20	22.7273	0.984152		20	22.7273	0.136506		6	6.81818	0.993448		2	2.27273	0.775393		2	2.27273	0.418363		3	3.40909	0.0999052		0	0	1		36	40.9091	0.00506798		21	23.8636	0.960918		37	42.0455	0.000999063		16	18.1818	0.993755
hsa04910	Insulin signaling pathway	118	48	40.678	0.00101928		29	24.5763	0.974916		22	18.6441	0.433666		15	12.7119	0.781431		4	3.38983	0.518445		3	2.54237	0.296937		2	1.69492	0.465738		1	0.847458	0.178878		43	36.4407	0.0219046		26	22.0339	0.992566		50	42.3729	9.50303e-05		26	22.0339	0.965114
hsa04664	Fc epsilon RI signaling pathway	58	27	46.5517	0.00112108		11	18.9655	0.991872		19	32.7586	0.00419643		6	10.3448	0.881253		2	3.44828	0.546757		1	1.72414	0.606602		0	0	1		0	0	1		25	43.1034	0.00731232		12	20.6897	0.97651		29	50	7.70742e-05		10	17.2414	0.985669
hsa04623	Cytosolic DNA-sensing pathway	46	22	47.8261	0.00114035		8	17.3913	0.987967		19	41.3043	0.000144699		4	8.69565	0.924525		6	13.0435	0.00240512		0	0	1		5	10.8696	0.00139208		0	0	1		21	45.6522	0.00424359		6	13.0435	0.998522		22	47.8261	0.000601068		6	13.0435	0.994397
hsa04141	Protein processing in endoplasmic reticulum	159	60	37.7358	0.00204187		23	14.4654	1		48	30.1887	7.74051e-05		15	9.43396	0.983976		10	6.28931	0.0326754		0	0	1		3	1.88679	0.382113		0	0	1		69	43.3962	1.05854e-05		21	13.2075	1		57	35.8491	0.00377153		23	14.4654	0.999994
hsa04723	Retrograde endocannabinoid signaling	103	40	38.835	0.00232868		18	17.4757	0.999266		36	34.9515	2.07451e-05		8	7.76699	0.990194		1	0.970874	0.951614		0	0	1		1	0.970874	0.853929		1	0.970874	0.213191		41	39.8058	0.00208537		19	18.4466	0.998041		37	35.9223	0.00669959		15	14.5631	0.999324
hsa05032	Morphine addiction	52	24	46.1538	0.00243504		14	26.9231	0.834125		13	25	0.118831		6	11.5385	0.805315		1	1.92308	0.809989		1	1.92308	0.567105		0	0	1		1	1.92308	0.0860079		25	48.0769	0.00121982		15	28.8462	0.713598		23	44.2308	0.00340043		13	25	0.775536
hsa00520	Amino sugar and nucleotide sugar metabolism	48	22	45.8333	0.0030321		11	22.9167	0.930109		12	25	0.12273		3	6.25	0.979403		1	2.08333	0.787561		1	2.08333	0.542056		1	2.08333	0.54373		0	0	1		22	45.8333	0.00408564		11	22.9167	0.921605		23	47.9167	0.000632893		10	20.8333	0.905253
hsa04015	Rap1 signaling pathway	170	63	37.0588	0.00324155		45	26.4706	0.96281		37	21.7647	0.101635		18	10.5882	0.959046		3	1.76471	0.912098		4	2.35294	0.298602		0	0	1		0	0	1		61	35.8824	0.0110804		47	27.6471	0.893417		62	36.4706	0.00207008		43	25.2941	0.881297
hsa04540	Gap junction	67	29	43.2836	0.00326397		11	16.4179	0.999039		12	17.9104	0.528681		3	4.47761	0.9983		2	2.98507	0.635248		0	0	1		0	0	1		0	0	1		30	44.7761	0.00188336		14	20.8955	0.982345		28	41.791	0.00386746		10	14.9254	0.997769
hsa04640	Hematopoietic cell lineage	84	34	40.4762	0.00328882		28	33.3333	0.391899		28	33.3333	0.000371596		13	15.4762	0.475597		1	1.19048	0.928866		2	2.38095	0.380937		2	2.38095	0.408026		0	0	1		32	38.0952	0.016784		28	33.3333	0.361296		33	39.2857	0.00319837		28	33.3333	0.165558
hsa04961	Endocrine and other factor-regulated calcium reabsorption	42	20	47.619	0.00337275		7	16.6667	0.992801		8	19.0476	0.478602		2	4.7619	0.99064		1	2.38095	0.735154		0	0	1		0	0	1		0	0	1		19	45.2381	0.00988456		8	19.0476	0.976228		18	42.8571	0.0128088		7	16.6667	0.976857
hsa04370	VEGF signaling pathway	53	24	45.283	0.0035477		11	20.7547	0.978629		18	33.9623	0.0033332		6	11.3208	0.819971		2	3.77358	0.508218		1	1.88679	0.580466		0	0	1		0	0	1		24	45.283	0.00428264		12	22.6415	0.945222		25	47.1698	0.00080313		10	18.8679	0.966956
hsa05171	Coronavirus disease - COVID-19	186	64	34.4086	0.00358042		24	12.9032	1		64	34.4086	3.30883e-08		6	3.22581	1		23	12.3656	3.09538e-09		1	0.537634	0.93347		19	10.2151	4.18687e-09		0	0	1		60	32.2581	0.0363346		27	14.5161	1		64	34.4086	0.00106792		16	8.60215	1
hsa00010	Glycolysis / Gluconeogenesis	49	22	44.898	0.00387672		8	16.3265	0.994974		15	30.6122	0.0173505		7	14.2857	0.591906		2	4.08163	0.467058		2	4.08163	0.188857		0	0	1		0	0	1		19	38.7755	0.048308		9	18.3673	0.984886		22	44.898	0.00217072		8	16.3265	0.980928
hsa04130	SNARE interactions in vesicular transport	32	16	50	0.00413793		4	12.5	0.997059		14	43.75	0.000547261		1	3.125	0.994161		4	12.5	0.0172974		2	6.25	0.0922753		2	6.25	0.0841674		0	0	1		17	53.125	0.00167375		3	9.375	0.999287		15	46.875	0.0076455		3	9.375	0.997939
hsa05223	Non-small cell lung cancer	68	29	42.6471	0.00437095		15	22.0588	0.978276		19	27.9412	0.0254793		6	8.82353	0.952021		1	1.47059	0.884993		1	1.47059	0.663916		1	1.47059	0.586757		0	0	1		27	39.7059	0.0202706		16	23.5294	0.94686		31	45.5882	0.000448307		10	14.7059	0.998272
hsa04740	Olfactory transduction	38	18	47.3684	0.00454165		10	26.3158	0.806785		5	13.1579	0.82772		0	0	1		1	2.63158	0.693271		0	0	1		0	0	1		0	0	1		17	44.7368	0.0142036		10	26.3158	0.789798		17	44.7368	0.00744458		10	26.3158	0.658817
hsa04915	Estrogen signaling pathway	92	37	40.2174	0.00457592		16	17.3913	0.999625		19	20.6522	0.264389		6	6.52174	0.99573		1	1.08696	0.949015		0	0	1		2	2.17391	0.347696		0	0	1		35	38.0435	0.0187518		17	18.4783	0.998578		38	41.3043	0.00112218		14	15.2174	0.99937
hsa04010	MAPK signaling pathway	239	84	35.1464	0.00462476		60	25.1046	0.995232		63	26.3598	0.000517461		27	11.2971	0.954895		11	4.60251	0.151711		5	2.09205	0.355512		2	0.83682	0.815015		2	0.83682	0.0564297		79	33.0544	0.0374658		69	28.8703	0.853743		85	35.5649	0.000936099		52	21.7573	0.996185
hsa05205	Proteoglycans in cancer	172	63	36.6279	0.00489247		48	27.907	0.921055		44	25.5814	0.00614961		20	11.6279	0.908846		3	1.74419	0.917327		1	0.581395	0.941763		1	0.581395	0.887089		2	1.16279	0.0298206		60	34.8837	0.0230071		50	29.0698	0.806676		66	38.3721	0.0003635		42	24.4186	0.931774
hsa05017	Spinocerebellar ataxia	122	46	37.7049	0.00490893		28	22.9508	0.988077		35	28.6885	0.00181148		14	11.4754	0.883032		2	1.63934	0.894471		0	0	1		0	0	1		0	0	1		49	40.1639	0.00125143		28	22.9508	0.983814		49	40.1639	0.000295269		27	22.1311	0.952392
hsa00920	Sulfur metabolism	10	7	70	0.00503577		0	0	1		5	50	0.0190378		0	0	1		1	10	0.274494		0	0	1		0	0	1		0	0	1		7	70	0.00574904		0	0	1		6	60	0.0215296		0	0	1
hsa00511	Other glycan degradation	17	10	58.8235	0.00527601		2	11.7647	0.986911		6	35.2941	0.0612893		1	5.88235	0.932316		2	11.7647	0.104888		0	0	1		1	5.88235	0.230794		0	0	1		10	58.8235	0.00619679		1	5.88235	0.998359		12	70.5882	0.000132179		1	5.88235	0.996645
hsa05212	Pancreatic cancer	72	30	41.6667	0.00552889		17	23.6111	0.960633		20	27.7778	0.0233827		8	11.1111	0.859586		3	4.16667	0.402212		1	1.38889	0.69121		1	1.38889	0.618682		0	0	1		30	41.6667	0.00677939		18	25	0.913845		31	43.0556	0.00138291		13	18.0556	0.988391
hsa04659	Th17 cell differentiation	97	38	39.1753	0.00595963		36	37.1134	0.173669		28	28.866	0.00468923		16	16.4948	0.369124		2	2.06186	0.817117		1	1.03093	0.793883		2	2.06186	0.399309		0	0	1		36	37.1134	0.0233763		36	37.1134	0.140781		37	38.1443	0.00550329		32	32.9897	0.206593
hsa05165	Human papillomavirus infection	277	94	33.935	0.00631156		74	26.7148	0.980303		66	23.8267	0.00557046		34	12.2744	0.904588		9	3.2491	0.512776		1	0.361011	0.989116		10	3.61011	0.00575142		2	0.722022	0.0845185		94	33.935	0.00990122		86	31.0469	0.596819		91	32.852	0.00616779		65	23.4657	0.980982
hsa04920	Adipocytokine signaling pathway	58	25	43.1034	0.0067168		11	18.9655	0.992727		19	32.7586	0.00405788		12	20.6897	0.143439		0	0	1		1	1.72414	0.618085		0	0	1		0	0	1		27	46.5517	0.00158376		11	18.9655	0.990156		26	44.8276	0.00169544		10	17.2414	0.987078
hsa04216	Ferroptosis	39	18	46.1538	0.00677789		6	15.3846	0.994078		16	41.0256	0.000552233		1	2.5641	0.998135		1	2.5641	0.713747		0	0	1		3	7.69231	0.0225974		0	0	1		19	48.7179	0.00323372		5	12.8205	0.997932		18	46.1538	0.00421944		5	12.8205	0.993789
hsa04658	Th1 and Th2 cell differentiation	80	32	40	0.00759613		26	32.5	0.513042		23	28.75	0.0101365		13	16.25	0.410194		1	1.25	0.924703		1	1.25	0.728538		1	1.25	0.684791		0	0	1		31	38.75	0.0177876		27	33.75	0.372027		30	37.5	0.0147943		25	31.25	0.346493
hsa04072	Phospholipase D signaling pathway	119	45	37.8151	0.00853455		32	26.8908	0.927195		24	20.1681	0.277422		13	10.9244	0.915648		2	1.68067	0.899624		1	0.840336	0.860404		1	0.840336	0.775759		1	0.840336	0.17001		45	37.8151	0.010545		35	29.4118	0.748927		46	38.6555	0.00227733		26	21.8487	0.972818
hsa05416	Viral myocarditis	52	22	42.3077	0.00865967		15	28.8462	0.69876		21	40.3846	9.25422e-05		5	9.61538	0.898982		0	0	1		0	0	1		0	0	1		0	0	1		22	42.3077	0.0116343		14	26.9231	0.780288		21	40.3846	0.0113431		12	23.0769	0.823477
hsa04917	Prolactin signaling pathway	59	25	42.3729	0.00927413		13	22.0339	0.973202		14	23.7288	0.152957		5	8.47458	0.951834		3	5.08475	0.287375		1	1.69492	0.616964		2	3.38983	0.166461		0	0	1		24	40.678	0.0213205		12	20.339	0.982713		26	44.0678	0.00250885		12	20.339	0.954748
hsa04622	RIG-I-like receptor signaling pathway	51	22	43.1373	0.00958575		5	9.80392	0.999964		17	33.3333	0.00519188		4	7.84314	0.956275		4	7.84314	0.0801658		0	0	1		5	9.80392	0.000677623		0	0	1		19	37.2549	0.0820144		5	9.80392	0.999948		22	43.1373	0.0058934		5	9.80392	0.999759
hsa05144	Malaria	44	19	43.1818	0.00959213		10	22.7273	0.913752		16	36.3636	0.00235399		1	2.27273	0.999127		3	6.81818	0.144894		1	2.27273	0.491713		5	11.3636	0.0010997		0	0	1		20	45.4545	0.00550754		9	20.4545	0.953491		18	40.9091	0.0136969		8	18.1818	0.945656
hsa00531	Glycosaminoglycan degradation	18	10	55.5556	0.00962881		1	5.55556	0.999071		8	44.4444	0.00722506		1	5.55556	0.942622		1	5.55556	0.447613		0	0	1		1	5.55556	0.225411		0	0	1		11	61.1111	0.00283371		3	16.6667	0.954764		11	61.1111	0.00173218		0	0	1
hsa04530	Tight junction	132	48	36.3636	0.0101439		37	28.0303	0.858409		31	23.4848	0.0536059		18	13.6364	0.685326		4	3.0303	0.602732		1	0.757576	0.882753		3	2.27273	0.305745		0	0	1		48	36.3636	0.014132		39	29.5455	0.709213		48	36.3636	0.00461585		33	25	0.844154
hsa04933	AGE-RAGE signaling pathway in diabetic complications	84	33	39.2857	0.0105713		23	27.381	0.864962		19	22.619	0.153962		13	15.4762	0.488759		4	4.7619	0.274555		2	2.38095	0.391839		3	3.57143	0.100937		1	1.19048	0.130803		29	34.5238	0.0967688		23	27.381	0.832725		33	39.2857	0.00576748		21	25	0.822659
hsa04724	Glutamatergic synapse	78	31	39.7436	0.0109612		24	30.7692	0.663588		22	28.2051	0.0148573		10	12.8205	0.741843		3	3.84615	0.449604		0	0	1		1	1.28205	0.645152		1	1.28205	0.121147		33	42.3077	0.00357745		23	29.4872	0.704418		31	39.7436	0.00615664		22	28.2051	0.60626
hsa04330	Notch signaling pathway	54	23	42.5926	0.0110073		8	14.8148	0.999125		12	22.2222	0.230922		4	7.40741	0.967271		1	1.85185	0.832727		1	1.85185	0.594048		0	0	1		0	0	1		24	44.4444	0.00607059		11	20.3704	0.978518		22	40.7407	0.0145648		4	7.40741	0.999984
hsa00500	Starch and sucrose metabolism	26	13	50	0.0120898		5	19.2308	0.958941		5	19.2308	0.495162		3	11.5385	0.761806		0	0	1		1	3.84615	0.354454		0	0	1		0	0	1		11	42.3077	0.0796965		5	19.2308	0.951593		13	50	0.00867769		5	19.2308	0.915756
hsa00760	Nicotinate and nicotinamide metabolism	30	14	46.6667	0.0128901		8	26.6667	0.769665		10	33.3333	0.0283598		3	10	0.841653		0	0	1		0	0	1		0	0	1		0	0	1		16	53.3333	0.00189711		9	30	0.612571		13	43.3333	0.0228289		7	23.3333	0.773037
hsa01522	Endocrine resistance	85	33	38.8235	0.0137523		17	20	0.996437		17	20	0.334741		6	7.05882	0.99124		0	0	1		0	0	1		2	2.35294	0.297884		0	0	1		33	38.8235	0.016514		19	22.3529	0.97946		33	38.8235	0.00769674		12	14.1176	0.999655
hsa04371	Apelin signaling pathway	111	41	36.9369	0.0138563		33	29.7297	0.741315		21	18.9189	0.408917		12	10.8108	0.914516		1	0.900901	0.971598		0	0	1		1	0.900901	0.792448		2	1.8018	0.0162216		42	37.8378	0.0107104		32	28.8288	0.761893		40	36.036	0.012065		29	26.1261	0.76248
hsa04024	cAMP signaling pathway	146	52	35.6164	0.0140872		41	28.0822	0.879263		26	17.8082	0.524135		14	9.58904	0.977637		3	2.05479	0.841925		1	0.684932	0.905781		1	0.684932	0.868511		1	0.684932	0.223434		49	33.5616	0.0610999		41	28.0822	0.842328		52	35.6164	0.00649374		36	24.6575	0.888707
hsa05320	Autoimmune thyroid disease	31	14	45.1613	0.0142565		7	22.5806	0.879597		14	45.1613	0.000326349		3	9.67742	0.853379		0	0	1		0	0	1		0	0	1		0	0	1		14	45.1613	0.0188002		6	19.3548	0.943416		13	41.9355	0.0242206		7	22.5806	0.775629
hsa04071	Sphingolipid signaling pathway	111	41	36.9369	0.014263		23	20.7207	0.997473		25	22.5225	0.111307		10	9.00901	0.974583		2	1.8018	0.87212		1	0.900901	0.836986		1	0.900901	0.78843		1	0.900901	0.176006		38	34.2342	0.0702682		24	21.6216	0.992766		40	36.036	0.0125431		18	16.2162	0.999349
hsa01521	EGFR tyrosine kinase inhibitor resistance	70	28	40	0.0146862		16	22.8571	0.972152		17	24.2857	0.104875		6	8.57143	0.960222		2	2.85714	0.648484		1	1.42857	0.675264		2	2.85714	0.217396		0	0	1		28	40	0.0171757		17	24.2857	0.934224		29	41.4286	0.00433526		13	18.5714	0.985072
hsa00770	Pantothenate and CoA biosynthesis	19	10	52.6316	0.0155819		5	26.3158	0.781884		5	26.3158	0.234729		2	10.5263	0.795361		0	0	1		0	0	1		0	0	1		0	0	1		9	47.3684	0.0505147		6	31.5789	0.58497		9	47.3684	0.03614		5	26.3158	0.676137
hsa00030	Pentose phosphate pathway	25	12	48	0.0156298		2	8	0.998946		8	32	0.0558388		2	8	0.898077		1	4	0.552924		0	0	1		0	0	1		0	0	1		13	52	0.00662883		2	8	0.998844		11	44	0.0303001		2	8	0.996926
hsa04978	Mineral absorption	42	18	42.8571	0.0160757		7	16.6667	0.991293		16	38.0952	0.0014755		2	4.7619	0.990569		2	4.7619	0.363784		0	0	1		3	7.14286	0.0264823		0	0	1		19	45.2381	0.00856305		8	19.0476	0.973178		17	40.4762	0.023697		7	16.6667	0.972728
hsa04931	Insulin resistance	92	35	38.0435	0.0170718		26	28.2609	0.84437		25	27.1739	0.015787		15	16.3043	0.391639		1	1.08696	0.950142		2	2.17391	0.442338		2	2.17391	0.317593		0	0	1		32	34.7826	0.0838648		23	25	0.940345		37	40.2174	0.0026902		22	23.913	0.895533
hsa04966	Collecting duct acid secretion	20	10	50	0.0177181		3	15	0.970452		8	40	0.0158394		1	5	0.959602		0	0	1		0	0	1		0	0	1		0	0	1		11	55	0.00656067		2	10	0.993446		9	45	0.0387105		3	15	0.941862
hsa04514	Cell adhesion molecules	113	41	36.2832	0.0183083		41	36.2832	0.19538		35	30.9735	0.000391304		12	10.6195	0.923921		6	5.30973	0.151766		1	0.884956	0.842832		1	0.884956	0.80764		0	0	1		40	35.3982	0.0376808		41	36.2832	0.159202		38	33.6283	0.0406861		39	34.5133	0.103214
hsa04727	GABAergic synapse	54	22	40.7407	0.0188916		14	25.9259	0.868156		19	35.1852	0.00159579		7	12.963	0.708839		2	3.7037	0.502848		0	0	1		0	0	1		1	1.85185	0.0921717		24	44.4444	0.0051426		14	25.9259	0.847266		21	38.8889	0.0244241		13	24.0741	0.814178
hsa05030	Cocaine addiction	36	16	44.4444	0.0192869		8	22.2222	0.93498		9	25	0.172215		1	2.77778	0.996898		2	5.55556	0.325208		0	0	1		1	2.77778	0.387984		0	0	1		15	41.6667	0.0477909		9	25	0.852507		15	41.6667	0.0308357		6	16.6667	0.970958
hsa05220	Chronic myeloid leukemia	72	28	38.8889	0.0207195		13	18.0556	0.997972		17	23.6111	0.12632		7	9.72222	0.925984		1	1.38889	0.900863		1	1.38889	0.688158		1	1.38889	0.613324		0	0	1		27	37.5	0.0428296		17	23.6111	0.949452		30	41.6667	0.00309955		9	12.5	0.99976
hsa04962	Vasopressin-regulated water reabsorption	37	16	43.2432	0.0216236		8	21.6216	0.938721		12	32.4324	0.0214178		2	5.40541	0.980268		2	5.40541	0.321591		0	0	1		0	0	1		0	0	1		15	40.5405	0.0543922		9	24.3243	0.863809		17	45.9459	0.00589701		4	10.8108	0.997418
hsa01230	Biosynthesis of amino acids	62	24	38.7097	0.0216838		12	19.3548	0.98819		19	30.6452	0.00762147		6	9.67742	0.906657		2	3.22581	0.591123		2	3.22581	0.264986		0	0	1		0	0	1		22	35.4839	0.0876709		18	29.0323	0.678056		22	35.4839	0.0460773		9	14.5161	0.996023
hsa04022	cGMP-PKG signaling pathway	126	45	35.7143	0.0217497		36	28.5714	0.843931		25	19.8413	0.299176		13	10.3175	0.947013		7	5.55556	0.101655		1	0.793651	0.869074		1	0.793651	0.81591		0	0	1		45	35.7143	0.0275045		32	25.3968	0.949823		46	36.5079	0.00667635		30	23.8095	0.919106
hsa05330	Allograft rejection	30	13	43.3333	0.0249109		6	20	0.929865		15	50	4.67196e-05		2	6.66667	0.947436		0	0	1		0	0	1		0	0	1		0	0	1		13	43.3333	0.0323785		5	16.6667	0.972224		12	40	0.0414526		6	20	0.857757
hsa04940	Type I diabetes mellitus	33	14	42.4242	0.0255536		6	18.1818	0.963782		17	51.5152	8.88769e-06		3	9.09091	0.882332		0	0	1		0	0	1		0	0	1		0	0	1		13	39.3939	0.0709671		5	15.1515	0.986823		13	39.3939	0.0404326		6	18.1818	0.915811
hsa05211	Renal cell carcinoma	64	25	39.0625	0.0268159		11	17.1875	0.998145		13	20.3125	0.342054		4	6.25	0.990192		1	1.5625	0.874196		1	1.5625	0.648363		0	0	1		0	0	1		26	40.625	0.0166993		13	20.3125	0.985407		26	40.625	0.00858427		9	14.0625	0.998571
hsa04012	ErbB signaling pathway	73	28	38.3562	0.0287496		19	26.0274	0.914595		17	23.2877	0.141961		9	12.3288	0.780769		1	1.36986	0.907411		1	1.36986	0.698718		2	2.73973	0.21739		1	1.36986	0.103897		25	34.2466	0.136332		19	26.0274	0.889387		30	41.0959	0.00478406		13	17.8082	0.991944
hsa00564	Glycerophospholipid metabolism	81	30	37.037	0.029579		25	30.8642	0.633675		20	24.6914	0.0666982		9	11.1111	0.862713		3	3.7037	0.47582		0	0	1		0	0	1		0	0	1		33	40.7407	0.00636741		26	32.0988	0.496443		28	34.5679	0.0518272		20	24.6914	0.820635
hsa04270	Vascular smooth muscle contraction	94	34	36.1702	0.0301745		19	20.2128	0.996243		20	21.2766	0.213761		9	9.57447	0.950183		5	5.31915	0.165828		2	2.12766	0.436029		1	1.06383	0.744696		0	0	1		34	36.1702	0.0381015		18	19.1489	0.997473		34	36.1702	0.017326		17	18.0851	0.993517
hsa00600	Sphingolipid metabolism	47	19	40.4255	0.0306323		13	27.6596	0.787925		14	29.7872	0.0282324		7	14.8936	0.553635		3	6.38298	0.189886		0	0	1		2	4.25532	0.147599		0	0	1		21	44.6809	0.00812105		11	23.4043	0.915316		20	42.5532	0.00946144		9	19.1489	0.951017
hsa05332	Graft-versus-host disease	34	14	41.1765	0.0342355		9	26.4706	0.756168		16	47.0588	6.65209e-05		2	5.88235	0.968932		0	0	1		0	0	1		0	0	1		0	0	1		13	38.2353	0.0894726		6	17.6471	0.97056		13	38.2353	0.052438		9	26.4706	0.59977
hsa01200	Carbon metabolism	100	35	35	0.0349174		12	12	0.999999		26	26	0.0207457		9	9	0.966608		3	3	0.622069		2	2	0.48356		0	0	1		0	0	1		29	29	0.362822		18	18	0.998978		34	34	0.0317405		11	11	0.99999
hsa04215	Apoptosis - multiple species	30	13	43.3333	0.0371121		7	23.3333	0.888821		12	40	0.00321695		5	16.6667	0.459656		2	6.66667	0.252517		0	0	1		2	6.66667	0.0744202		0	0	1		14	46.6667	0.0179756		7	23.3333	0.876658		12	40	0.0614118		7	23.3333	0.793721
hsa00983	Drug metabolism - other enzymes	50	19	38	0.0376284		9	18	0.98596		16	32	0.00969326		3	6	0.984363		2	4	0.445936		0	0	1		3	6	0.0687992		0	0	1		24	48	0.000887887		9	18	0.984806		18	36	0.0473192		8	16	0.979306
hsa05213	Endometrial cancer	54	21	38.8889	0.0408522		12	22.2222	0.963235		15	27.7778	0.0452029		5	9.25926	0.920018		1	1.85185	0.82442		0	0	1		1	1.85185	0.514718		0	0	1		22	40.7407	0.0248131		15	27.7778	0.775724		23	42.5926	0.00641591		9	16.6667	0.987926
hsa00330	Arginine and proline metabolism	40	16	40	0.0417034		11	27.5	0.757059		9	22.5	0.25946		3	7.5	0.94658		2	5	0.366242		0	0	1		4	10	0.00440922		0	0	1		14	35	0.166713		13	32.5	0.48013		15	37.5	0.0587804		9	22.5	0.828492
hsa04060	Cytokine-cytokine receptor interaction	193	62	32.1244	0.0420237		60	31.0881	0.565601		56	29.0155	6.50369e-05		24	12.4352	0.850442		10	5.18135	0.0746306		3	1.5544	0.582556		10	5.18135	0.00139881		1	0.518135	0.331698		61	31.6062	0.0840749		58	30.0518	0.638115		59	30.5699	0.0543067		50	25.9067	0.765193
hsa04971	Gastric acid secretion	51	20	39.2157	0.0430861		13	25.4902	0.891004		11	21.5686	0.285303		4	7.84314	0.956424		2	3.92157	0.485678		0	0	1		1	1.96078	0.487281		0	0	1		19	37.2549	0.0869091		13	25.4902	0.869783		19	37.2549	0.0561179		11	21.5686	0.913725
hsa00051	Fructose and mannose metabolism	31	13	41.9355	0.0448251		4	12.9032	0.995708		9	29.0323	0.0812956		3	9.67742	0.856654		0	0	1		0	0	1		0	0	1		0	0	1		11	35.4839	0.19485		5	16.129	0.982656		13	41.9355	0.0326162		4	12.9032	0.987495
hsa05231	Choline metabolism in cancer	86	31	36.0465	0.0476243		22	25.5814	0.935244		17	19.7674	0.354871		14	16.2791	0.403925		1	1.16279	0.938572		1	1.16279	0.755017		2	2.32558	0.30049		0	0	1		34	39.5349	0.0112215		21	24.4186	0.946896		32	37.2093	0.0171126		19	22.093	0.944103
hsa04151	PI3K-Akt signaling pathway	267	85	31.8352	0.047876		75	28.0899	0.940061		57	21.3483	0.070946		29	10.8614	0.977282		7	2.62172	0.745866		4	1.49813	0.626452		1	0.374532	0.975144		3	1.1236	0.010481		84	31.4607	0.0835273		80	29.9625	0.742108		83	31.0861	0.0371752		65	24.3446	0.958943
hsa04657	IL-17 signaling pathway	72	26	36.1111	0.0483824		14	19.4444	0.993182		19	26.3889	0.0412705		5	6.94444	0.986983		3	4.16667	0.397652		0	0	1		6	8.33333	0.000866239		0	0	1		26	36.1111	0.0596888		15	20.8333	0.982024		26	36.1111	0.0303085		12	16.6667	0.992648
hsa00592	alpha-Linolenic acid metabolism	14	7	50	0.0496051		2	14.2857	0.962082		5	35.7143	0.0822033		1	7.14286	0.891745		1	7.14286	0.360906		0	0	1		0	0	1		0	0	1		6	42.8571	0.14938		2	14.2857	0.959774		7	50	0.0400633		2	14.2857	0.934813
hsa04725	Cholinergic synapse	80	29	36.25	0.050914		21	26.25	0.909909		16	20	0.344549		9	11.25	0.861663		3	3.75	0.457273		1	1.25	0.722321		1	1.25	0.635936		1	1.25	0.118333		29	36.25	0.0584197		21	26.25	0.884856		30	37.5	0.0187054		17	21.25	0.957986
hsa04972	Pancreatic secretion	59	22	37.2881	0.0514057		13	22.0339	0.966399		14	23.7288	0.145974		6	10.1695	0.887146		2	3.38983	0.553709		0	0	1		1	1.69492	0.577278		0	0	1		23	38.9831	0.0342253		16	27.1186	0.802345		22	37.2881	0.0345274		13	22.0339	0.899505
hsa04014	Ras signaling pathway	173	57	32.948	0.0546873		53	30.6358	0.716724		36	20.8092	0.167872		25	14.4509	0.59616		5	2.89017	0.647968		4	2.31214	0.306621		1	0.578035	0.90122		2	1.15607	0.033234		57	32.948	0.0679486		55	31.7919	0.517948		57	32.948	0.0279027		47	27.1676	0.729202
hsa04360	Axon guidance	146	49	33.5616	0.0564002		51	34.9315	0.294613		32	21.9178	0.116332		25	17.1233	0.257448		3	2.05479	0.842213		7	4.79452	0.00908868		4	2.73973	0.116784		0	0	1		44	30.137	0.278113		54	36.9863	0.103928		48	32.8767	0.0458901		46	31.5068	0.291851
hsa00290	Valine, leucine and isoleucine biosynthesis	4	3	75	0.0565401		0	0	1		2	50	0.143651		0	0	1		0	0	1		0	0	1		0	0	1		0	0	1		2	50	0.291916		1	25	0.770738		2	50	0.260489		0	0	1
hsa04260	Cardiac muscle contraction	62	22	35.4839	0.0573956		11	17.7419	0.99329		23	37.0968	0.000224525		4	6.45161	0.98747		2	3.22581	0.546756		1	1.6129	0.606392		0	0	1		0	0	1		27	43.5484	0.00267481		14	22.5806	0.935599		21	33.871	0.0649927		11	17.7419	0.971524
hsa00603	Glycosphingolipid biosynthesis - globo and isoglobo series	12	6	50	0.0710059		2	16.6667	0.932122		6	50	0.0100827		1	8.33333	0.851081		1	8.33333	0.321755		1	8.33333	0.177777		2	16.6667	0.0145915		0	0	1		7	58.3333	0.0225201		1	8.33333	0.988827		7	58.3333	0.0159395		2	16.6667	0.893657
hsa01524	Platinum drug resistance	65	23	35.3846	0.0788504		18	27.6923	0.804352		18	27.6923	0.0305201		9	13.8462	0.64331		0	0	1		0	0	1		3	4.61538	0.0726438		0	0	1		24	36.9231	0.0560579		17	26.1538	0.850236		25	38.4615	0.0160456		15	23.0769	0.86678
hsa04918	Thyroid hormone synthesis	55	20	36.3636	0.0791575		13	23.6364	0.934684		10	18.1818	0.517507		5	9.09091	0.926174		3	5.45455	0.244314		0	0	1		0	0	1		0	0	1		20	36.3636	0.0913054		15	27.2727	0.790993		20	36.3636	0.0558901		10	18.1818	0.973934
hsa05210	Colorectal cancer	81	28	34.5679	0.085831		25	30.8642	0.650976		21	25.9259	0.0413508		15	18.5185	0.216208		1	1.23457	0.927617		1	1.23457	0.733885		2	2.46914	0.299416		0	0	1		29	35.8025	0.0636513		26	32.0988	0.507103		30	37.037	0.0197703		21	25.9259	0.761455
hsa04146	Peroxisome	73	25	34.2466	0.0863305		22	30.137	0.644364		20	27.3973	0.0246695		10	13.6986	0.650941		1	1.36986	0.90221		0	0	1		2	2.73973	0.334313		1	1.36986	0.139165		24	32.8767	0.160383		19	26.0274	0.85756		25	34.2466	0.0568359		17	23.2877	0.853637
hsa04911	Insulin secretion	55	20	36.3636	0.0882163		15	27.2727	0.832675		9	16.3636	0.657718		5	9.09091	0.926441		3	5.45455	0.256359		2	3.63636	0.224312		1	1.81818	0.516337		0	0	1		19	34.5455	0.158708		15	27.2727	0.803764		20	36.3636	0.063416		12	21.8182	0.912088
hsa04061	Viral protein interaction with cytokine and cytokine receptor	71	24	33.8028	0.0882663		21	29.5775	0.646324		25	35.2113	0.000296766		7	9.85915	0.916756		5	7.04225	0.0646733		0	0	1		7	9.85915	0.000261469		0	0	1		23	32.3944	0.168477		21	29.5775	0.624672		24	33.8028	0.0575412		19	26.7606	0.605592
hsa01212	Fatty acid metabolism	53	19	35.8491	0.0909207		12	22.6415	0.947336		12	22.6415	0.214268		5	9.43396	0.909324		2	3.77358	0.506887		0	0	1		0	0	1		0	0	1		19	35.8491	0.105924		12	22.6415	0.938221		19	35.8491	0.0644681		11	20.7547	0.921443
hsa01250	Biosynthesis of nucleotide sugars	37	14	37.8378	0.0916272		10	27.027	0.785927		6	16.2162	0.651808		2	5.40541	0.979672		0	0	1		1	2.7027	0.455396		0	0	1		0	0	1		14	37.8378	0.105133		9	24.3243	0.864717		14	37.8378	0.068787		9	24.3243	0.763354
hsa04921	Oxytocin signaling pathway	118	39	33.0508	0.0922954		33	27.9661	0.869631		21	17.7966	0.529191		14	11.8644	0.853583		3	2.54237	0.722186		2	1.69492	0.565272		1	0.847458	0.797104		0	0	1		36	30.5085	0.265758		36	30.5085	0.64178		38	32.2034	0.0837239		30	25.4237	0.829394
hsa04510	Focal adhesion	168	54	32.1429	0.0940352		44	26.1905	0.969212		31	18.4524	0.437163		17	10.119	0.973088		1	0.595238	0.995673		0	0	1		0	0	1		1	0.595238	0.237717		56	33.3333	0.0604119		50	29.7619	0.740285		55	32.7381	0.0369647		38	22.619	0.976704
hsa04970	Salivary secretion	53	19	35.8491	0.0984845		16	30.1887	0.668236		7	13.2075	0.852058		6	11.3208	0.818672		5	9.43396	0.0244984		0	0	1		1	1.88679	0.530073		0	0	1		20	37.7358	0.0657012		19	35.8491	0.293011		19	35.8491	0.0714337		15	28.3019	0.579619
hsa04136	Autophagy - other	31	12	38.7097	0.0986723		5	16.129	0.985771		12	38.7097	0.0043595		4	12.9032	0.689071		1	3.22581	0.638266		0	0	1		0	0	1		0	0	1		14	45.1613	0.0244054		7	22.5806	0.896834		14	45.1613	0.0144589		4	12.9032	0.988454
hsa04927	Cortisol synthesis and secretion	43	16	37.2093	0.101282		11	25.5814	0.873176		6	13.9535	0.796062		4	9.30233	0.898357		1	2.32558	0.74616		0	0	1		0	0	1		0	0	1		15	34.8837	0.186191		14	32.5581	0.515699		13	30.2326	0.333178		9	20.9302	0.916162
hsa04020	Calcium signaling pathway	149	48	32.2148	0.101981		42	28.1879	0.885894		27	18.1208	0.480963		13	8.72483	0.990951		5	3.3557	0.524263		4	2.68456	0.226526		1	0.671141	0.861941		0	0	1		49	32.8859	0.0889466		42	28.1879	0.846715		48	32.2148	0.0596751		37	24.8322	0.891247
hsa01040	Biosynthesis of unsaturated fatty acids	25	10	40	0.102054		5	20	0.935792		4	16	0.666934		1	4	0.981817		1	4	0.552172		0	0	1		0	0	1		0	0	1		8	32	0.363926		5	20	0.929198		10	40	0.0811516		4	16	0.951763
hsa04750	Inflammatory mediator regulation of TRP channels	72	25	34.7222	0.104326		23	31.9444	0.591041		12	16.6667	0.641832		10	13.8889	0.643085		3	4.16667	0.40937		1	1.38889	0.695456		1	1.38889	0.59998		0	0	1		21	29.1667	0.435134		23	31.9444	0.537621		25	34.7222	0.0728377		21	29.1667	0.547391
hsa04120	Ubiquitin mediated proteolysis	138	44	31.8841	0.104783		37	26.8116	0.918252		34	24.6377	0.0254547		22	15.942	0.399346		7	5.07246	0.141718		0	0	1		4	2.89855	0.150512		1	0.724638	0.228099		45	32.6087	0.0940843		39	28.2609	0.807891		43	31.1594	0.0873909		33	23.913	0.903501
hsa04614	Renin-angiotensin system	13	6	46.1538	0.104918		3	23.0769	0.834329		3	23.0769	0.406974		0	0	1		0	0	1		0	0	1		0	0	1		0	0	1		6	46.1538	0.113461		3	23.0769	0.824612		6	46.1538	0.0886665		3	23.0769	0.759895
hsa00220	Arginine biosynthesis	16	7	43.75	0.105441		3	18.75	0.923391		4	25	0.304276		1	6.25	0.921582		0	0	1		0	0	1		0	0	1		0	0	1		7	43.75	0.115475		5	31.25	0.592992		7	43.75	0.0875444		3	18.75	0.872929
hsa04261	Adrenergic signaling in cardiomyocytes	110	36	32.7273	0.112132		29	26.3636	0.926449		20	18.1818	0.484538		9	8.18182	0.987615		4	3.63636	0.466523		3	2.72727	0.263636		0	0	1		0	0	1		34	30.9091	0.241941		33	30	0.678245		35	31.8182	0.104673		26	23.6364	0.909489
hsa05143	African trypanosomiasis	29	11	37.931	0.112285		4	13.7931	0.991593		7	24.1379	0.242799		1	3.44828	0.990517		2	6.89655	0.21952		0	0	1		4	13.7931	0.00138552		0	0	1		10	34.4828	0.230332		2	6.89655	0.999688		11	37.931	0.0873708		4	13.7931	0.977953
hsa04973	Carbohydrate digestion and absorption	31	12	38.7097	0.115197		8	25.8065	0.842242		4	12.9032	0.826465		4	12.9032	0.698649		1	3.22581	0.634739		0	0	1		0	0	1		0	0	1		11	35.4839	0.218534		8	25.8065	0.819577		14	45.1613	0.0187176		8	25.8065	0.726015
hsa04730	Long-term depression	47	17	36.1702	0.119925		8	17.0213	0.995002		9	19.1489	0.457836		4	8.51064	0.93354		5	10.6383	0.0161329		0	0	1		0	0	1		0	0	1		18	38.2979	0.0758915		10	21.2766	0.961579		16	34.0426	0.154035		7	14.8936	0.993278
hsa03250	Viral life cycle - HIV-1	61	21	34.4262	0.121658		16	26.2295	0.870181		17	27.8689	0.0326827		8	13.1148	0.70173		3	4.91803	0.300591		1	1.63934	0.626275		4	6.55738	0.0111834		0	0	1		20	32.7869	0.208835		14	22.9508	0.946182		18	29.5082	0.304001		13	21.3115	0.925646
hsa04713	Circadian entrainment	64	22	34.375	0.122099		19	29.6875	0.714374		11	17.1875	0.596481		4	6.25	0.990169		3	4.6875	0.321187		0	0	1		1	1.5625	0.584101		1	1.5625	0.103584		23	35.9375	0.0871993		18	28.125	0.767127		21	32.8125	0.139664		17	26.5625	0.703682
hsa00562	Inositol phosphate metabolism	70	24	34.2857	0.125711		20	28.5714	0.803714		11	15.7143	0.722147		11	15.7143	0.476259		0	0	1		2	2.85714	0.3157		0	0	1		0	0	1		20	28.5714	0.483168		17	24.2857	0.935513		24	34.2857	0.0900556		19	27.1429	0.695029
hsa04218	Cellular senescence	146	46	31.5068	0.128275		48	32.8767	0.457075		35	23.9726	0.0328114		27	18.4932	0.129444		3	2.05479	0.842827		1	0.684932	0.906198		3	2.05479	0.339035		1	0.684932	0.22845		46	31.5068	0.155212		47	32.1918	0.463835		48	32.8767	0.036967		43	29.4521	0.457537
hsa04211	Longevity regulating pathway	77	26	33.7662	0.130774		20	25.974	0.916721		17	22.0779	0.194662		8	10.3896	0.90275		1	1.2987	0.915486		0	0	1		1	1.2987	0.61994		0	0	1		27	35.0649	0.0964747		20	25.974	0.893531		28	36.3636	0.0347596		16	20.7792	0.964616
hsa05225	Hepatocellular carcinoma	146	46	31.5068	0.132302		40	27.3973	0.9124		31	21.2329	0.155347		21	14.3836	0.598141		2	1.36986	0.946725		2	1.36986	0.68064		4	2.73973	0.14278		1	0.684932	0.223817		44	30.137	0.262087		47	32.1918	0.469201		49	33.5616	0.0258576		37	25.3425	0.848745
hsa04672	Intestinal immune network for IgA production	40	14	35	0.133157		15	37.5	0.234208		14	35	0.00619542		7	17.5	0.37381		2	5	0.348528		0	0	1		0	0	1		0	0	1		14	35	0.156987		16	40	0.136627		13	32.5	0.174759		13	32.5	0.295522
hsa05204	Chemical carcinogenesis - DNA adducts	31	11	35.4839	0.135681		3	9.67742	0.998524		10	32.2581	0.0344014		1	3.22581	0.992856		1	3.22581	0.596904		0	0	1		3	9.67742	0.0256358		0	0	1		11	35.4839	0.163474		5	16.129	0.976962		11	35.4839	0.104384		2	6.45161	0.999204
hsa04975	Fat digestion and absorption	20	8	40	0.13785		4	20	0.920851		6	30	0.121421		1	5	0.957954		0	0	1		0	0	1		0	0	1		0	0	1		7	35	0.289726		4	20	0.914332		8	40	0.113915		3	15	0.951054
hsa05216	Thyroid cancer	36	13	36.1111	0.141082		7	19.4444	0.967823		11	30.5556	0.0411949		3	8.33333	0.917756		3	8.33333	0.105762		0	0	1		1	2.77778	0.418053		0	0	1		14	38.8889	0.0868616		9	25	0.842193		13	36.1111	0.110605		5	13.8889	0.988375
hsa05219	Bladder cancer	39	14	35.8974	0.144132		8	20.5128	0.963603		13	33.3333	0.0134869		1	2.5641	0.99809		2	5.12821	0.356156		0	0	1		3	7.69231	0.0166506		0	0	1		13	33.3333	0.255801		11	28.2051	0.73015		13	33.3333	0.193238		5	12.8205	0.994885
hsa00410	beta-Alanine metabolism	26	10	38.4615	0.14591		5	19.2308	0.957228		5	19.2308	0.497085		1	3.84615	0.984625		0	0	1		0	0	1		1	3.84615	0.289188		0	0	1		9	34.6154	0.276097		5	19.2308	0.949863		10	38.4615	0.119377		6	23.0769	0.812335
hsa04152	AMPK signaling pathway	105	34	32.381	0.148508		24	22.8571	0.98928		22	20.9524	0.223663		11	10.4762	0.924825		3	2.85714	0.662402		2	1.90476	0.515456		2	1.90476	0.383877		0	0	1		34	32.381	0.167581		23	21.9048	0.991088		34	32.381	0.100314		20	19.0476	0.993675
hsa05033	Nicotine addiction	8	4	50	0.153857		0	0	1		3	37.5	0.156558		0	0	1		1	12.5	0.230976		0	0	1		0	0	1		0	0	1		4	50	0.157907		0	0	1		4	50	0.138593		0	0	1
hsa05414	Dilated cardiomyopathy	69	23	33.3333	0.154536		22	31.8841	0.578473		11	15.942	0.694795		9	13.0435	0.711269		1	1.44928	0.891291		2	2.89855	0.304044		0	0	1		0	0	1		22	31.8841	0.248623		27	39.1304	0.116068		22	31.8841	0.170946		21	30.4348	0.437975
hsa04728	Dopaminergic synapse	100	32	32	0.155435		33	33	0.467038		22	22	0.155474		11	11	0.891478		3	3	0.61936		1	1	0.804324		1	1	0.758016		1	1	0.162096		30	30	0.31816		30	30	0.667975		32	32	0.105212		29	29	0.517937
hsa04919	Thyroid hormone signaling pathway	106	34	32.0755	0.16344		22	20.7547	0.997544		12	11.3208	0.97476		13	12.2642	0.814875		3	2.83019	0.658676		2	1.88679	0.512419		0	0	1		0	0	1		30	28.3019	0.481284		26	24.5283	0.960303		35	33.0189	0.0762995		19	17.9245	0.997341
hsa04976	Bile secretion	47	16	34.0426	0.173444		10	21.2766	0.963662		9	19.1489	0.454884		5	10.6383	0.846037		2	4.25532	0.444675		0	0	1		0	0	1		0	0	1		17	36.1702	0.118206		14	29.7872	0.651127		14	29.7872	0.320345		9	19.1489	0.950782
hsa04726	Serotonergic synapse	74	24	32.4324	0.178927		20	27.027	0.860477		16	21.6216	0.224044		6	8.10811	0.971614		2	2.7027	0.6858		0	0	1		1	1.35135	0.647439		1	1.35135	0.121855		25	33.7838	0.138517		22	29.7297	0.675705		23	31.0811	0.192122		17	22.973	0.894187
hsa05215	Prostate cancer	87	28	32.1839	0.189438		22	25.2874	0.946014		18	20.6897	0.276455		9	10.3448	0.916861		1	1.14943	0.941333		0	0	1		0	0	1		0	0	1		30	34.4828	0.10042		22	25.2874	0.927334		30	34.4828	0.0592328		15	17.2414	0.996671
hsa05230	Central carbon metabolism in cancer	61	20	32.7869	0.189586		12	19.6721	0.989791		16	26.2295	0.0609043		8	13.1148	0.699274		3	4.91803	0.308708		1	1.63934	0.631996		1	1.63934	0.579882		0	0	1		19	31.1475	0.300884		17	27.8689	0.773347		22	36.0656	0.0524068		9	14.7541	0.996768
hsa01210	2-Oxocarboxylic acid metabolism	15	6	40	0.190512		2	13.3333	0.974919		3	20	0.502504		0	0	1		1	6.66667	0.391506		0	0	1		0	0	1		0	0	1		4	26.6667	0.619491		5	33.3333	0.532798		5	33.3333	0.337806		1	6.66667	0.993486
hsa04913	Ovarian steroidogenesis	31	11	35.4839	0.191283		4	12.9032	0.996419		5	16.129	0.659562		1	3.22581	0.993		1	3.22581	0.627008		0	0	1		0	0	1		0	0	1		11	35.4839	0.207977		7	22.5806	0.901196		10	32.2581	0.268746		4	12.9032	0.989526
hsa04923	Regulation of lipolysis in adipocytes	41	14	34.1463	0.20067		12	29.2683	0.717208		3	7.31707	0.984149		4	9.7561	0.878319		1	2.43902	0.723907		0	0	1		0	0	1		0	0	1		16	39.0244	0.0737302		13	31.7073	0.556365		15	36.5854	0.0924537		10	24.3902	0.79095
hsa04340	Hedgehog signaling pathway	47	16	34.0426	0.203599		22	46.8085	0.0324023		4	8.51064	0.977433		13	27.6596	0.01738		1	2.12766	0.780377		2	4.25532	0.174965		0	0	1		0	0	1		13	27.6596	0.569142		20	42.5532	0.0844675		15	31.9149	0.253467		22	46.8085	0.00901335
hsa00071	Fatty acid degradation	35	12	34.2857	0.204137		7	20	0.959635		9	25.7143	0.147651		6	17.1429	0.412545		1	2.85714	0.683202		0	0	1		0	0	1		0	0	1		12	34.2857	0.224769		7	20	0.953824		12	34.2857	0.164822		7	20	0.906711
hsa00440	Phosphonate and phosphinate metabolism	6	3	50	0.20775		2	33.3333	0.632695		3	50	0.0716732		0	0	1		0	0	1		0	0	1		0	0	1		0	0	1		3	50	0.214145		2	33.3333	0.618454		3	50	0.191225		2	33.3333	0.561579
hsa03060	Protein export	23	8	34.7826	0.218244		6	26.087	0.752544		7	30.4348	0.0968897		1	4.34783	0.975161		0	0	1		0	0	1		0	0	1		0	0	1		9	39.1304	0.126827		3	13.0435	0.985783		8	34.7826	0.181578		5	21.7391	0.791113
hsa05310	Asthma	20	7	35	0.218968		3	15	0.964848		8	40	0.0152899		2	10	0.816021		0	0	1		0	0	1		0	0	1		0	0	1		7	35	0.249151		3	15	0.964775		6	30	0.341261		3	15	0.931421
hsa00982	Drug metabolism - cytochrome P450	30	10	33.3333	0.221219		7	23.3333	0.857666		9	30	0.0658352		3	10	0.837597		1	3.33333	0.602244		0	0	1		2	6.66667	0.114057		0	0	1		10	33.3333	0.252987		6	20	0.930848		10	33.3333	0.178852		6	20	0.863623
hsa00062	Fatty acid elongation	26	9	34.6154	0.224155		7	26.9231	0.752336		7	26.9231	0.156794		2	7.69231	0.912156		2	7.69231	0.196727		1	3.84615	0.34273		0	0	1		0	0	1		9	34.6154	0.248043		8	30.7692	0.582847		7	26.9231	0.493661		7	26.9231	0.618026
hsa01523	Antifolate resistance	29	10	34.4828	0.234446		5	17.2414	0.977594		6	20.6897	0.40939		4	13.7931	0.642796		1	3.44828	0.607357		0	0	1		0	0	1		0	0	1		15	51.7241	0.00460584		5	17.2414	0.973796		10	34.4828	0.196077		2	6.89655	0.999301
hsa00130	Ubiquinone and other terpenoid-quinone biosynthesis	10	4	40	0.245438		1	10	0.975186		3	30	0.248758		1	10	0.79575		0	0	1		0	0	1		0	0	1		0	0	1		5	50	0.0989303		1	10	0.974392		4	40	0.219108		1	10	0.959759
hsa00230	Purine metabolism	104	31	29.8077	0.245494		29	27.8846	0.813981		17	16.3462	0.67819		16	15.3846	0.476992		5	4.80769	0.219334		1	0.961538	0.80831		0	0	1		0	0	1		37	35.5769	0.0332087		31	29.8077	0.64281		27	25.9615	0.476538		27	25.9615	0.716229
hsa00120	Primary bile acid biosynthesis	10	4	40	0.246241		3	30	0.641724		3	30	0.24956		1	10	0.79632		0	0	1		0	0	1		0	0	1		0	0	1		4	40	0.264283		3	30	0.635393		4	40	0.219401		2	20	0.807485
hsa00561	Glycerolipid metabolism	46	15	32.6087	0.24708		17	36.9565	0.298062		8	17.3913	0.579555		8	17.3913	0.370353		2	4.34783	0.437008		0	0	1		0	0	1		0	0	1		15	32.6087	0.267631		19	41.3043	0.10736		15	32.6087	0.198819		13	28.2609	0.593621
hsa00860	Porphyrin metabolism	27	9	33.3333	0.253228		7	25.9259	0.780369		7	25.9259	0.182713		3	11.1111	0.781163		1	3.7037	0.572828		0	0	1		1	3.7037	0.387372		0	0	1		11	40.7407	0.080548		7	25.9259	0.770768		9	33.3333	0.210822		6	22.2222	0.797285
hsa05218	Melanoma	54	17	31.4815	0.274347		12	22.2222	0.960756		12	22.2222	0.238301		3	5.55556	0.990913		1	1.85185	0.820562		0	0	1		1	1.85185	0.530158		0	0	1		18	33.3333	0.204495		14	25.9259	0.850928		19	35.1852	0.0859231		10	18.5185	0.970364
hsa04068	FoxO signaling pathway	113	34	30.0885	0.280764		32	28.3186	0.852247		25	22.1239	0.135433		18	15.9292	0.414131		2	1.76991	0.877557		1	0.884956	0.841485		2	1.76991	0.434715		1	0.884956	0.169223		36	31.8584	0.182143		34	30.0885	0.682101		36	31.8584	0.107096		29	25.6637	0.816422
hsa00601	Glycosphingolipid biosynthesis - lacto and neolacto series	20	7	35	0.28807		3	15	0.978469		4	20	0.475423		1	5	0.958503		1	5	0.489899		1	5	0.28779		0	0	1		0	0	1		7	35	0.302491		2	10	0.995042		6	30	0.430878		3	15	0.956663
hsa01232	Nucleotide metabolism	75	22	29.3333	0.291123		19	25.3333	0.882999		19	25.3333	0.0589242		8	10.6667	0.882309		6	8	0.0269822		0	0	1		1	1.33333	0.747858		0	0	1		26	34.6667	0.0774477		20	26.6667	0.809797		19	25.3333	0.504141		18	24	0.790047
hsa05214	Glioma	65	20	30.7692	0.299876		16	24.6154	0.932604		12	18.4615	0.49266		5	7.69231	0.973832		1	1.53846	0.871738		1	1.53846	0.644915		1	1.53846	0.580301		0	0	1		20	30.7692	0.324019		17	26.1538	0.863978		22	33.8462	0.104819		12	18.4615	0.981641
hsa04213	Longevity regulating pathway - multiple species	51	16	31.3725	0.313838		11	21.5686	0.971433		10	19.6078	0.413388		5	9.80392	0.8916		1	1.96078	0.808528		0	0	1		0	0	1		0	0	1		15	29.4118	0.451033		13	25.4902	0.874637		18	35.2941	0.104566		10	19.6078	0.958248
hsa00240	Pyrimidine metabolism	50	15	30	0.31742		15	30	0.625511		13	26	0.0913344		6	12	0.771064		3	6	0.198363		1	2	0.545327		1	2	0.583484		0	0	1		20	40	0.0288897		16	32	0.481987		14	28	0.366013		13	26	0.661415
hsa00512	Mucin type O-glycan biosynthesis	24	8	33.3333	0.324385		3	12.5	0.994011		5	20.8333	0.423106		3	12.5	0.712566		0	0	1		0	0	1		0	0	1		0	0	1		9	37.5	0.196255		3	12.5	0.992709		8	33.3333	0.285588		3	12.5	0.985514
hsa00980	Metabolism of xenobiotics by cytochrome P450	37	11	29.7297	0.327099		6	16.2162	0.984241		10	27.027	0.100703		2	5.40541	0.979646		1	2.7027	0.666934		0	0	1		3	8.10811	0.0392645		0	0	1		11	29.7297	0.372876		6	16.2162	0.983874		11	29.7297	0.268588		5	13.5135	0.98395
hsa05206	MicroRNAs in cancer	151	44	29.1391	0.335662		43	28.4768	0.876282		22	14.5695	0.874807		20	13.245	0.750107		1	0.662252	0.992253		4	2.64901	0.223639		2	1.3245	0.574487		0	0	1		43	28.4768	0.440376		48	31.7881	0.530074		41	27.1523	0.437961		36	23.8411	0.938965
hsa02010	ABC transporters	31	10	32.2581	0.343942		10	32.2581	0.595788		3	9.67742	0.932909		9	29.0323	0.0332891		2	6.45161	0.26906		0	0	1		0	0	1		0	0	1		11	35.4839	0.223686		10	32.2581	0.555889		10	32.2581	0.298092		8	25.8065	0.734677
hsa05410	Hypertrophic cardiomyopathy	67	20	29.8507	0.348314		23	34.3284	0.402506		11	16.4179	0.655026		11	16.4179	0.405968		1	1.49254	0.88379		2	2.98507	0.291747		0	0	1		0	0	1		19	28.3582	0.484318		27	40.2985	0.0828965		19	28.3582	0.378516		22	32.8358	0.275169
hsa05222	Small cell lung cancer	82	24	29.2683	0.360659		22	26.8293	0.876663		14	17.0732	0.603762		16	19.5122	0.149442		1	1.21951	0.927954		1	1.21951	0.734511		1	1.21951	0.689712		1	1.21951	0.135724		23	28.0488	0.491684		24	29.2683	0.709317		26	31.7073	0.14401		19	23.1707	0.894614
hsa04930	Type II diabetes mellitus	35	11	31.4286	0.362789		11	31.4286	0.629559		9	25.7143	0.155191		7	20	0.258648		2	5.71429	0.310087		2	5.71429	0.111033		1	2.85714	0.346627		0	0	1		11	31.4286	0.377599		8	22.8571	0.913531		11	31.4286	0.313507		10	28.5714	0.605119
hsa00590	Arachidonic acid metabolism	41	12	29.2683	0.365409		10	24.3902	0.85802		9	21.9512	0.283827		3	7.31707	0.952242		1	2.43902	0.717115		0	0	1		1	2.43902	0.533976		0	0	1		13	31.7073	0.28115		13	31.7073	0.499153		11	26.8293	0.437236		9	21.9512	0.83167
hsa00513	Various types of N-glycan biosynthesis	36	11	30.5556	0.368603		8	22.2222	0.929271		8	22.2222	0.288128		6	16.6667	0.437629		1	2.77778	0.694493		0	0	1		1	2.77778	0.413632		0	0	1		13	36.1111	0.16091		6	16.6667	0.986346		11	30.5556	0.314917		8	22.2222	0.849729
hsa05224	Breast cancer	117	34	29.0598	0.373921		33	28.2051	0.867671		20	17.094	0.61028		11	9.40171	0.970298		1	0.854701	0.977493		0	0	1		2	1.7094	0.436497		1	0.854701	0.169751		34	29.0598	0.405233		37	31.6239	0.554971		35	29.9145	0.2195		28	23.9316	0.915034
hsa04925	Aldosterone synthesis and secretion	68	20	29.4118	0.381435		23	33.8235	0.441014		8	11.7647	0.932351		6	8.82353	0.950472		2	2.94118	0.631166		0	0	1		0	0	1		0	0	1		17	25	0.724114		23	33.8235	0.395256		18	26.4706	0.522249		20	29.4118	0.512387
hsa04929	GnRH secretion	47	14	29.7872	0.400053		14	29.7872	0.701513		4	8.51064	0.976809		7	14.8936	0.55968		0	0	1		2	4.25532	0.171685		0	0	1		0	0	1		12	25.5319	0.678155		17	36.1702	0.304655		16	34.0426	0.146617		14	29.7872	0.51031
hsa00340	Histidine metabolism	19	6	31.5789	0.4037		4	21.0526	0.902236		2	10.5263	0.873039		1	5.26316	0.952218		0	0	1		0	0	1		1	5.26316	0.247731		0	0	1		4	21.0526	0.80504		4	21.0526	0.892753		6	31.5789	0.36164		4	21.0526	0.835521
hsa04080	Neuroactive ligand-receptor interaction	148	41	27.7027	0.409404		44	29.7297	0.723911		32	21.6216	0.126188		13	8.78378	0.990052		10	6.75676	0.0178657		1	0.675676	0.907427		3	2.02703	0.406734		2	1.35135	0.0337523		42	28.3784	0.393708		39	26.3514	0.915102		40	27.027	0.365873		36	24.3243	0.878124
hsa04520	Adherens junction	65	19	29.2308	0.412596		16	24.6154	0.936515		11	16.9231	0.619449		6	9.23077	0.935451		1	1.53846	0.878825		0	0	1		1	1.53846	0.56287		0	0	1		21	32.3077	0.240159		16	24.6154	0.919452		19	29.2308	0.343037		14	21.5385	0.93612
hsa00470	D-Amino acid metabolism	5	2	40	0.413945		2	40	0.520722		2	40	0.210144		1	20	0.544986		0	0	1		0	0	1		1	20	0.0650399		0	0	1		2	40	0.423208		2	40	0.508385		2	40	0.392559		2	40	0.451308
hsa00524	Neomycin, kanamycin and gentamicin biosynthesis	5	2	40	0.417693		1	20	0.861086		1	20	0.621442		1	20	0.551146		0	0	1		1	20	0.0810949		0	0	1		0	0	1		2	40	0.424897		1	20	0.853412		2	40	0.396462		1	20	0.822278
hsa00020	Citrate cycle (TCA cycle)	27	8	29.6296	0.420482		3	11.1111	0.996733		6	22.2222	0.330956		2	7.40741	0.922502		1	3.7037	0.581662		0	0	1		0	0	1		0	0	1		5	18.5185	0.890697		5	18.5185	0.95317		8	29.6296	0.36903		2	7.40741	0.998384
hsa01240	Biosynthesis of cofactors	128	35	27.3438	0.428783		38	29.6875	0.691124		23	17.9688	0.487179		16	12.5	0.795936		7	5.46875	0.111372		2	1.5625	0.612469		0	0	1		0	0	1		38	29.6875	0.270562		37	28.9062	0.726326		33	25.7812	0.474088		30	23.4375	0.893281
hsa04070	Phosphatidylinositol signaling system	87	25	28.7356	0.439102		33	37.931	0.178375		9	10.3448	0.981099		18	20.6897	0.0905174		0	0	1		2	2.29885	0.407855		0	0	1		0	0	1		21	24.1379	0.810428		30	34.4828	0.342468		25	28.7356	0.359121		32	36.7816	0.0820815
hsa04150	mTOR signaling pathway	140	39	27.8571	0.444363		32	22.8571	0.994334		28	20	0.269031		15	10.7143	0.938713		0	0	1		2	1.42857	0.655294		1	0.714286	0.86002		1	0.714286	0.217354		43	30.7143	0.217759		34	24.2857	0.976606		39	27.8571	0.338422		27	19.2857	0.99636
hsa05226	Gastric cancer	114	32	28.0702	0.459076		36	31.5789	0.614996		19	16.6667	0.652465		17	14.9123	0.532221		1	0.877193	0.975953		1	0.877193	0.847317		1	0.877193	0.778124		1	0.877193	0.171107		33	28.9474	0.411043		39	34.2105	0.3184		34	29.8246	0.221099		30	26.3158	0.772459
hsa04974	Protein digestion and absorption	60	17	28.3333	0.472312		17	28.3333	0.790879		11	18.3333	0.509341		7	11.6667	0.811254		1	1.66667	0.855331		1	1.66667	0.6227		1	1.66667	0.546588		1	1.66667	0.0938828		19	31.6667	0.280766		20	33.3333	0.440066		17	28.3333	0.401901		15	25	0.794986
hsa04916	Melanogenesis	79	22	27.8481	0.482367		25	31.6456	0.588671		9	11.3924	0.954261		6	7.59494	0.983206		2	2.53165	0.712239		0	0	1		0	0	1		1	1.26582	0.126979		22	27.8481	0.515227		26	32.9114	0.443762		20	25.3165	0.604042		23	29.1139	0.523786
hsa00604	Glycosphingolipid biosynthesis - ganglio series	13	4	30.7692	0.484271		3	23.0769	0.841925		5	38.4615	0.0607334		1	7.69231	0.872244		1	7.69231	0.347328		0	0	1		1	7.69231	0.166563		0	0	1		5	38.4615	0.273673		2	15.3846	0.950199		5	38.4615	0.232728		3	23.0769	0.770908
hsa04924	Renin secretion	46	13	28.2609	0.488793		17	36.9565	0.299368		5	10.8696	0.927767		6	13.0435	0.694792		3	6.52174	0.179322		0	0	1		1	2.17391	0.467728		0	0	1		13	28.2609	0.51368		17	36.9565	0.266825		11	23.913	0.688126		15	32.6087	0.342216
hsa04742	Taste transduction	32	9	28.125	0.505545		10	31.25	0.604846		2	6.25	0.984607		2	6.25	0.961639		0	0	1		0	0	1		0	0	1		0	0	1		8	25	0.68244		10	31.25	0.576568		9	28.125	0.451971		8	25	0.737693
hsa04660	T cell receptor signaling pathway	94	26	27.6596	0.507769		39	41.4894	0.0413878		18	19.1489	0.398956		20	21.2766	0.0585923		2	2.12766	0.812494		1	1.06383	0.790455		1	1.06383	0.707455		1	1.06383	0.142043		26	27.6596	0.537904		40	42.5532	0.0177867		28	29.7872	0.252391		35	37.234	0.054041
hsa00350	Tyrosine metabolism	22	6	27.2727	0.523357		4	18.1818	0.94306		5	22.7273	0.338526		1	4.54545	0.969616		0	0	1		0	0	1		1	4.54545	0.334686		0	0	1		5	22.7273	0.736565		5	22.7273	0.851336		6	27.2727	0.473177		4	18.1818	0.892153
hsa00534	Glycosaminoglycan biosynthesis - heparan sulfate / heparin	17	5	29.4118	0.526329		5	29.4118	0.705518		2	11.7647	0.834698		2	11.7647	0.747118		0	0	1		0	0	1		1	5.88235	0.180439		0	0	1		6	35.2941	0.328472		5	29.4118	0.678904		4	23.5294	0.702908		4	23.5294	0.785481
hsa04110	Cell cycle	124	33	26.6129	0.543001		42	33.871	0.341906		18	14.5161	0.849741		23	18.5484	0.145236		3	2.41935	0.754602		1	0.806452	0.866318		0	0	1		1	0.806452	0.212407		38	30.6452	0.221594		42	33.871	0.297326		31	25	0.599039		36	29.0323	0.471268
hsa00260	Glycine, serine and threonine metabolism	34	9	26.4706	0.546852		5	14.7059	0.991949		5	14.7059	0.728257		2	5.88235	0.967988		0	0	1		0	0	1		0	0	1		0	0	1		8	23.5294	0.729223		8	23.5294	0.869099		9	26.4706	0.487253		4	11.7647	0.993047
hsa04960	Aldosterone-regulated sodium reabsorption	29	8	27.5862	0.552768		7	24.1379	0.877237		3	10.3448	0.910661		4	13.7931	0.647169		1	3.44828	0.595491		0	0	1		0	0	1		0	0	1		9	31.0345	0.406273		9	31.0345	0.600419		8	27.5862	0.504527		6	20.6897	0.887424
hsa04934	Cushing syndrome	119	32	26.8908	0.569338		34	28.5714	0.841829		16	13.4454	0.913903		12	10.084	0.950665		1	0.840336	0.978394		0	0	1		0	0	1		1	0.840336	0.177961		32	26.8908	0.60514		39	32.7731	0.43861		28	23.5294	0.780326		29	24.3697	0.892322
hsa05340	Primary immunodeficiency	34	9	26.4706	0.571101		17	50	0.0197214		6	17.6471	0.565408		9	26.4706	0.0529628		2	5.88235	0.293836		0	0	1		0	0	1		0	0	1		10	29.4118	0.446913		18	52.9412	0.00681622		8	23.5294	0.668137		16	47.0588	0.0150658
hsa00730	Thiamine metabolism	11	3	27.2727	0.572414		2	18.1818	0.898512		2	18.1818	0.595104		1	9.09091	0.823602		1	9.09091	0.294816		0	0	1		0	0	1		0	0	1		3	27.2727	0.595879		3	27.2727	0.705228		3	27.2727	0.537905		2	18.1818	0.848959
hsa00360	Phenylalanine metabolism	11	3	27.2727	0.59565		2	18.1818	0.908969		1	9.09091	0.880068		0	0	1		0	0	1		0	0	1		1	9.09091	0.161258		0	0	1		3	27.2727	0.611112		4	36.3636	0.468307		3	27.2727	0.562056		2	18.1818	0.86273
hsa04964	Proximal tubule bicarbonate reclamation	19	5	26.3158	0.59853		5	26.3158	0.769623		3	15.7895	0.676676		2	10.5263	0.794668		1	5.26316	0.457496		0	0	1		0	0	1		0	0	1		5	26.3158	0.618659		6	31.5789	0.57246		4	21.0526	0.754453		5	26.3158	0.660591
hsa04512	ECM-receptor interaction	64	17	26.5625	0.600755		19	29.6875	0.728122		9	14.0625	0.825002		8	12.5	0.755544		1	1.5625	0.872981		0	0	1		1	1.5625	0.567181		1	1.5625	0.0991172		15	23.4375	0.813977		25	39.0625	0.132651		17	26.5625	0.528474		17	26.5625	0.717137
hsa03022	Basal transcription factors	39	10	25.641	0.604386		12	30.7692	0.598257		4	10.2564	0.932357		11	28.2051	0.0229386		0	0	1		0	0	1		1	2.5641	0.475104		0	0	1		12	30.7692	0.353888		13	33.3333	0.437766		9	23.0769	0.685934		12	30.7692	0.411712
hsa04922	Glucagon signaling pathway	84	22	26.1905	0.605175		24	28.5714	0.79126		14	16.6667	0.638898		13	15.4762	0.477789		3	3.57143	0.494293		2	2.38095	0.388937		0	0	1		0	0	1		19	22.619	0.868161		25	29.7619	0.675663		24	28.5714	0.329068		22	26.1905	0.734037
hsa04977	Vitamin digestion and absorption	15	4	26.6667	0.611784		3	20	0.907401		2	13.3333	0.768797		1	6.66667	0.908483		1	6.66667	0.38971		0	0	1		1	6.66667	0.189894		0	0	1		4	26.6667	0.626462		3	20	0.899016		4	26.6667	0.57641		2	13.3333	0.957167
hsa00640	Propanoate metabolism	31	8	25.8065	0.613532		8	25.8065	0.818698		6	19.3548	0.47046		5	16.129	0.490035		1	3.22581	0.629277		1	3.22581	0.393645		0	0	1		0	0	1		7	22.5806	0.780198		9	29.0323	0.67343		8	25.8065	0.562172		9	29.0323	0.53883
hsa04914	Progesterone-mediated oocyte maturation	88	23	26.1364	0.61632		22	25	0.943965		11	12.5	0.926886		8	9.09091	0.959737		0	0	1		0	0	1		0	0	1		0	0	1		28	31.8182	0.210821		20	22.7273	0.974539		24	27.2727	0.433068		20	22.7273	0.918703
hsa05031	Amphetamine addiction	50	13	26	0.624324		18	36	0.336311		8	16	0.679146		3	6	0.984739		2	4	0.478484		0	0	1		2	4	0.148863		0	0	1		12	24	0.760249		15	30	0.650967		13	26	0.560969		16	32	0.364635
hsa00620	Pyruvate metabolism	36	9	25	0.631016		8	22.2222	0.916474		5	13.8889	0.78047		7	19.4444	0.271059		2	5.55556	0.315624		1	2.77778	0.442105		0	0	1		0	0	1		7	19.4444	0.888077		8	22.2222	0.909445		9	25	0.57233		8	22.2222	0.826421
hsa04392	Hippo signaling pathway - multiple species	23	6	26.087	0.641496		14	60.8696	0.00527665		4	17.3913	0.604094		3	13.0435	0.687659		2	8.69565	0.162531		0	0	1		0	0	1		0	0	1		6	26.087	0.652687		14	60.8696	0.00409697		6	26.087	0.60129		9	39.1304	0.211248
hsa00565	Ether lipid metabolism	36	9	25	0.64676		9	25	0.851491		10	27.7778	0.087462		3	8.33333	0.916678		2	5.55556	0.313583		0	0	1		0	0	1		0	0	1		11	30.5556	0.382233		9	25	0.837757		9	25	0.591548		7	19.4444	0.917918
hsa00270	Cysteine and methionine metabolism	44	11	25	0.646925		10	22.7273	0.927645		7	15.9091	0.671178		8	18.1818	0.314116		2	4.54545	0.408779		2	4.54545	0.157909		1	2.27273	0.509514		0	0	1		9	20.4545	0.880455		15	34.0909	0.392773		10	22.7273	0.715395		10	22.7273	0.835013
hsa00061	Fatty acid biosynthesis	16	4	25	0.655465		6	37.5	0.402571		2	12.5	0.806866		3	18.75	0.436243		0	0	1		1	6.25	0.225965		0	0	1		0	0	1		5	31.25	0.44965		6	37.5	0.38286		4	25	0.618645		6	37.5	0.289229
hsa04122	Sulfur relay system	8	2	25	0.658378		2	25	0.765069		4	50	0.0352354		0	0	1		0	0	1		0	0	1		0	0	1		0	0	1		2	25	0.676266		2	25	0.760946		2	25	0.631997		1	12.5	0.925055
hsa05217	Basal cell carcinoma	51	13	25.4902	0.658957		20	39.2157	0.183927		9	17.6471	0.566708		8	15.6863	0.497052		1	1.96078	0.804467		1	1.96078	0.560807		1	1.96078	0.494551		1	1.96078	0.081529		13	25.4902	0.680209		21	41.1765	0.0967804		13	25.4902	0.59782		19	37.2549	0.126289
hsa00740	Riboflavin metabolism	8	2	25	0.660072		2	25	0.766591		3	37.5	0.15072		0	0	1		0	0	1		0	0	1		1	12.5	0.133717		0	0	1		2	25	0.67677		1	12.5	0.947828		2	25	0.633164		2	25	0.696797
hsa00430	Taurine and hypotaurine metabolism	8	2	25	0.664718		3	37.5	0.482731		0	0	1		1	12.5	0.720464		0	0	1		0	0	1		0	0	1		0	0	1		2	25	0.679678		2	25	0.764061		2	25	0.637872		3	37.5	0.39515
hsa03410	Base excision repair	33	8	24.2424	0.666271		13	39.3939	0.203617		5	15.1515	0.710531		6	18.1818	0.355436		1	3.0303	0.652319		0	0	1		0	0	1		0	0	1		7	21.2121	0.823123		13	39.3939	0.191563		9	27.2727	0.45256		10	30.303	0.439488
hsa00830	Retinol metabolism	25	6	24	0.674968		8	32	0.54496		5	20	0.449243		4	16	0.508852		2	8	0.189503		0	0	1		1	4	0.352541		0	0	1		5	20	0.843241		6	24	0.833717		6	24	0.628019		7	28	0.569069
hsa04720	Long-term potentiation	48	12	25	0.69157		14	29.1667	0.737447		8	16.6667	0.634211		5	10.4167	0.859924		0	0	1		0	0	1		0	0	1		0	0	1		10	20.8333	0.89164		14	29.1667	0.702715		12	25	0.63512		13	27.0833	0.673929
hsa00310	Lysine degradation	56	14	25	0.702591		16	28.5714	0.78143		4	7.14286	0.99336		12	21.4286	0.116109		1	1.78571	0.840077		1	1.78571	0.60314		0	0	1		0	0	1		12	21.4286	0.88798		17	30.3571	0.644386		16	28.5714	0.402816		14	25	0.796933
hsa05412	Arrhythmogenic right ventricular cardiomyopathy	60	15	25	0.709673		21	35	0.395312		6	10	0.967387		9	15	0.545114		0	0	1		0	0	1		0	0	1		0	0	1		15	25	0.728108		25	41.6667	0.0704343		14	23.3333	0.751347		19	31.6667	0.386892
hsa00250	Alanine, aspartate and glutamate metabolism	30	7	23.3333	0.736305		12	40	0.228635		3	10	0.918273		3	10	0.840269		0	0	1		1	3.33333	0.389763		2	6.66667	0.0690249		0	0	1		6	20	0.869926		14	46.6667	0.0588881		7	23.3333	0.692853		10	33.3333	0.349772
hsa00533	Glycosaminoglycan biosynthesis - keratan sulfate	13	3	23.0769	0.740972		3	23.0769	0.853499		2	15.3846	0.697809		2	15.3846	0.594857		0	0	1		0	0	1		0	0	1		0	0	1		3	23.0769	0.747894		3	23.0769	0.838912		2	15.3846	0.898012		2	15.3846	0.93137
hsa04115	p53 signaling pathway	71	17	23.9437	0.743063		21	29.5775	0.700647		14	19.7183	0.36731		8	11.2676	0.842299		2	2.8169	0.659535		0	0	1		0	0	1		0	0	1		20	28.169	0.475398		20	28.169	0.756588		17	23.9437	0.674169		20	28.169	0.564151
hsa04350	TGF-beta signaling pathway	74	18	24.3243	0.7437		23	31.0811	0.628211		10	13.5135	0.864952		12	16.2162	0.416195		2	2.7027	0.673974		2	2.7027	0.326161		1	1.35135	0.638585		1	1.35135	0.119136		19	25.6757	0.680134		23	31.0811	0.583256		16	21.6216	0.843467		22	29.7297	0.479091
hsa00910	Nitrogen metabolism	14	3	21.4286	0.745299		3	21.4286	0.856825		2	14.2857	0.7349		1	7.14286	0.893218		0	0	1		0	0	1		0	0	1		0	0	1		4	28.5714	0.535976		2	14.2857	0.957381		2	14.2857	0.896406		3	21.4286	0.785017
hsa00591	Linoleic acid metabolism	14	3	21.4286	0.750144		5	35.7143	0.453486		4	28.5714	0.218383		1	7.14286	0.891209		1	7.14286	0.358648		0	0	1		0	0	1		0	0	1		4	28.5714	0.541865		6	42.8571	0.241495		3	21.4286	0.719198		4	28.5714	0.571797
hsa00380	Tryptophan metabolism	35	8	22.8571	0.754175		3	8.57143	0.999779		6	17.1429	0.591974		3	8.57143	0.904982		1	2.85714	0.68434		1	2.85714	0.44086		1	2.85714	0.421125		0	0	1		7	20	0.877935		6	17.1429	0.981722		9	25.7143	0.559155		3	8.57143	0.999092
hsa00053	Ascorbate and aldarate metabolism	14	3	21.4286	0.764624		2	14.2857	0.964524		1	7.14286	0.932194		2	14.2857	0.629796		1	7.14286	0.372558		0	0	1		0	0	1		0	0	1		2	14.2857	0.927323		1	7.14286	0.99482		3	21.4286	0.735732		2	14.2857	0.93859
hsa04950	Maturity onset diabetes of the young	5	1	20	0.771068		1	20	0.837571		1	20	0.615436		0	0	1		0	0	1		1	20	0.0751824		0	0	1		0	0	1		2	40	0.39675		1	20	0.836593		1	20	0.753018		0	0	1
hsa00790	Folate biosynthesis	19	4	21.0526	0.774181		8	42.1053	0.215879		5	26.3158	0.233605		2	10.5263	0.794504		2	10.5263	0.113832		1	5.26316	0.257937		1	5.26316	0.28267		0	0	1		8	42.1053	0.109779		6	31.5789	0.559966		4	21.0526	0.740328		6	31.5789	0.441111
hsa00514	Other types of O-glycan biosynthesis	35	8	22.8571	0.784687		11	31.4286	0.624724		4	11.4286	0.888822		6	17.1429	0.418937		0	0	1		2	5.71429	0.114407		0	0	1		1	2.85714	0.0522408		7	20	0.891293		12	34.2857	0.443591		8	22.8571	0.744826		11	31.4286	0.453184
hsa00750	Vitamin B6 metabolism	5	1	20	0.788734		2	40	0.509204		0	0	1		0	0	1		0	0	1		0	0	1		0	0	1		0	0	1		1	20	0.796395		2	40	0.4993		1	20	0.772512		2	40	0.438313
hsa03020	RNA polymerase	33	7	21.2121	0.794218		13	39.3939	0.196529		8	24.2424	0.219069		6	18.1818	0.365303		0	0	1		0	0	1		0	0	1		0	0	1		7	21.2121	0.816912		12	36.3636	0.297033		7	21.2121	0.751039		11	33.3333	0.288504
hsa03015	mRNA surveillance pathway	85	20	23.5294	0.796748		29	34.1176	0.383998		10	11.7647	0.946874		11	12.9412	0.727088		2	2.35294	0.766368		2	2.35294	0.409121		0	0	1		0	0	1		19	22.3529	0.880649		26	30.5882	0.613334		19	22.3529	0.808107		24	28.2353	0.578426
hsa00532	Glycosaminoglycan biosynthesis - chondroitin sulfate / dermatan sulfate	19	4	21.0526	0.811096		4	21.0526	0.913966		2	10.5263	0.877465		1	5.26316	0.954019		1	5.26316	0.466683		0	0	1		1	5.26316	0.204958		0	0	1		4	21.0526	0.817631		6	31.5789	0.599289		4	21.0526	0.784022		3	15.7895	0.94822
hsa04710	Circadian rhythm	28	6	21.4286	0.822598		15	53.5714	0.0179362		2	7.14286	0.970947		7	25	0.112902		1	3.57143	0.597149		0	0	1		0	0	1		1	3.57143	0.041851		6	21.4286	0.831037		15	53.5714	0.0141628		5	17.8571	0.899026		14	50	0.0168534
hsa00100	Steroid biosynthesis	20	4	20	0.823551		4	20	0.921671		2	10	0.889217		1	5	0.958565		1	5	0.481914		0	0	1		0	0	1		0	0	1		3	15	0.939653		3	15	0.973179		4	20	0.794411		4	20	0.862674
hsa04744	Phototransduction	16	3	18.75	0.827613		5	31.25	0.586368		2	12.5	0.803144		1	6.25	0.92347		0	0	1		0	0	1		0	0	1		0	0	1		3	18.75	0.84223		6	37.5	0.364332		3	18.75	0.800735		3	18.75	0.86034
hsa04114	Oocyte meiosis	112	26	23.2143	0.832736		28	25	0.955897		18	16.0714	0.706201		9	8.03571	0.98941		3	2.67857	0.687073		0	0	1		0	0	1		0	0	1		29	25.8929	0.664924		25	22.3214	0.987233		23	20.5357	0.917959		26	23.2143	0.913898
hsa03420	Nucleotide excision repair	43	9	20.9302	0.835063		18	41.8605	0.0951567		4	9.30233	0.959062		9	20.9302	0.175752		1	2.32558	0.743429		0	0	1		0	0	1		0	0	1		10	23.2558	0.758426		18	41.8605	0.0859047		9	20.9302	0.791558		13	30.2326	0.42377
hsa00510	N-Glycan biosynthesis	47	10	21.2766	0.844577		15	31.9149	0.551234		7	14.8936	0.742483		9	19.1489	0.248922		0	0	1		0	0	1		0	0	1		0	0	1		12	25.5319	0.658803		11	23.4043	0.911819		9	19.1489	0.886402		15	31.9149	0.349302
hsa00040	Pentose and glucuronate interconversions	17	3	17.6471	0.862688		3	17.6471	0.937336		1	5.88235	0.961951		1	5.88235	0.932503		1	5.88235	0.419042		0	0	1		0	0	1		0	0	1		3	17.6471	0.875506		2	11.7647	0.984154		3	17.6471	0.839531		2	11.7647	0.970649
hsa03040	Spliceosome	131	29	22.1374	0.873948		43	32.8244	0.369049		17	12.9771	0.939335		22	16.7939	0.28905		0	0	1		2	1.52672	0.614336		0	0	1		0	0	1		24	18.3206	0.991167		38	29.0076	0.703079		29	22.1374	0.803384		37	28.2443	0.47663
hsa00450	Selenocompound metabolism	17	3	17.6471	0.879117		7	41.1765	0.292385		1	5.88235	0.962519		5	29.4118	0.0924361		0	0	1		1	5.88235	0.249516		0	0	1		0	0	1		3	17.6471	0.886627		7	41.1765	0.273143		4	23.5294	0.683456		7	41.1765	0.193603
hsa00140	Steroid hormone biosynthesis	29	5	17.2414	0.898639		5	17.2414	0.967197		6	20.6897	0.400897		1	3.44828	0.990148		3	10.3448	0.0540938		0	0	1		0	0	1		0	0	1		5	17.2414	0.914678		6	20.6897	0.914882		5	17.2414	0.87221		2	6.89655	0.998792
hsa00650	Butanoate metabolism	19	3	15.7895	0.917874		8	42.1053	0.23588		5	26.3158	0.230371		5	26.3158	0.13559		0	0	1		0	0	1		0	0	1		0	0	1		3	15.7895	0.924823		7	36.8421	0.385291		3	15.7895	0.901928		7	36.8421	0.283235
hsa00563	Glycosylphosphatidylinositol (GPI)-anchor biosynthesis	25	4	16	0.924377		10	40	0.22891		1	4	0.992058		3	12	0.734647		0	0	1		0	0	1		0	0	1		0	0	1		4	16	0.934032		8	32	0.527544		4	16	0.905828		9	36	0.239549
hsa00280	Valine, leucine and isoleucine degradation	44	8	18.1818	0.932458		11	25	0.87462		7	15.9091	0.671991		12	27.2727	0.0217932		1	2.27273	0.764653		0	0	1		1	2.27273	0.49046		0	0	1		7	15.9091	0.974529		14	31.8182	0.530821		7	15.9091	0.957747		10	22.7273	0.844012
hsa04550	Signaling pathways regulating pluripotency of stem cells	107	23	21.4953	0.932587		33	30.8411	0.682648		12	11.215	0.976941		13	12.1495	0.824453		1	0.934579	0.967023		2	1.86916	0.509436		1	0.934579	0.744366		2	1.86916	0.0124087		26	24.2991	0.813674		38	35.514	0.234568		24	22.4299	0.850375		32	29.9065	0.470622
hsa00900	Terpenoid backbone biosynthesis	20	3	15	0.933523		2	10	0.995204		3	15	0.709428		0	0	1		0	0	1		0	0	1		0	0	1		0	0	1		4	20	0.836531		2	10	0.994543		3	15	0.919247		2	10	0.98894
hsa03440	Homologous recombination	40	7	17.5	0.934145		14	35	0.37406		4	10	0.940401		10	25	0.0626818		2	5	0.350971		0	0	1		0	0	1		0	0	1		9	22.5	0.792002		13	32.5	0.481995		7	17.5	0.912595		11	27.5	0.593402
hsa00630	Glyoxylate and dicarboxylate metabolism	26	4	15.3846	0.938489		2	7.69231	0.99926		3	11.5385	0.857723		3	11.5385	0.756088		0	0	1		0	0	1		0	0	1		0	0	1		3	11.5385	0.984254		5	19.2308	0.93984		4	15.3846	0.922222		1	3.84615	0.999796
hsa03013	Nucleocytoplasmic transport	102	21	20.5882	0.944037		43	42.1569	0.0202866		12	11.7647	0.962276		24	23.5294	0.0132993		1	0.980392	0.961215		1	0.980392	0.805706		0	0	1		0	0	1		20	19.6078	0.972965		45	44.1176	0.00477518		20	19.6078	0.945201		39	38.2353	0.0232277
hsa03430	Mismatch repair	22	3	13.6364	0.95471		11	50	0.0538768		3	13.6364	0.771322		7	31.8182	0.0340922		1	4.54545	0.508617		0	0	1		0	0	1		0	0	1		4	18.1818	0.883338		11	50	0.0490946		3	13.6364	0.943017		8	36.3636	0.256649
hsa03018	RNA degradation	73	13	17.8082	0.971834		33	45.2055	0.0108618		7	9.58904	0.981964		14	19.1781	0.184777		3	4.10959	0.403645		3	4.10959	0.111264		0	0	1		0	0	1		14	19.1781	0.956792		29	39.726	0.0768618		12	16.4384	0.977507		29	39.726	0.0233915
hsa04310	Wnt signaling pathway	134	27	20.1493	0.977427		53	39.5522	0.0491551		15	11.194	0.986334		29	21.6418	0.0219825		1	0.746269	0.987338		0	0	1		2	1.49254	0.522751		1	0.746269	0.197199		26	19.403	0.989345		55	41.0448	0.0141574		26	19.403	0.974842		48	35.8209	0.0530988
hsa00670	One carbon pool by folate	19	2	10.5263	0.978262		4	21.0526	0.898882		1	5.26316	0.97491		2	10.5263	0.794222		1	5.26316	0.456181		0	0	1		0	0	1		0	0	1		5	26.3158	0.62039		5	26.3158	0.756888		2	10.5263	0.972757		2	10.5263	0.984975
hsa03450	Non-homologous end-joining	12	1	8.33333	0.978552		2	16.6667	0.940278		0	0	1		2	16.6667	0.547434		0	0	1		0	0	1		0	0	1		0	0	1		1	8.33333	0.979797		2	16.6667	0.934126		1	8.33333	0.974665		1	8.33333	0.984149
hsa04390	Hippo signaling pathway	127	25	19.685	0.982058		57	44.8819	0.00236409		17	13.3858	0.923014		23	18.1102	0.17898		4	3.14961	0.582361		1	0.787402	0.876207		0	0	1		2	1.5748	0.0175254		26	20.4724	0.975535		59	46.4567	0.000378107		25	19.685	0.967943		53	41.7323	0.00159484
hsa00970	Aminoacyl-tRNA biosynthesis	44	6	13.6364	0.989967		18	40.9091	0.143996		4	9.09091	0.962981		12	27.2727	0.0220103		1	2.27273	0.77715		1	2.27273	0.530877		2	4.54545	0.124237		0	0	1		7	15.9091	0.976651		21	47.7273	0.0186933		6	13.6364	0.985328		14	31.8182	0.386688
hsa03008	Ribosome biogenesis in eukaryotes	76	12	15.7895	0.990349		39	51.3158	0.000241834		11	14.4737	0.808305		25	32.8947	5.70936e-05		1	1.31579	0.90749		2	2.63158	0.333682		1	1.31579	0.715902		0	0	1		12	15.7895	0.992839		37	48.6842	0.000941809		11	14.4737	0.992566		33	43.4211	0.0028486
hsa03030	DNA replication	35	4	11.4286	0.991379		18	51.4286	0.0107913		4	11.4286	0.886798		7	20	0.251215		1	2.85714	0.677683		0	0	1		0	0	1		0	0	1		5	14.2857	0.976791		16	45.7143	0.0479541		4	11.4286	0.987554		15	42.8571	0.0418755
hsa00515	Mannose type O-glycan biosynthesis	22	2	9.09091	0.991664		11	50	0.0663379		1	4.54545	0.98565		3	13.6364	0.647461		0	0	1		2	9.09091	0.0516246		0	0	1		0	0	1		2	9.09091	0.992469		11	50	0.0577415		2	9.09091	0.989215		9	40.9091	0.161183
hsa03460	Fanconi anemia pathway	49	4	8.16327	0.999755		22	44.898	0.038596		3	6.12245	0.99537		12	24.4898	0.051384		2	4.08163	0.460626		0	0	1		0	0	1		0	0	1		4	8.16327	0.999808		21	42.8571	0.0590335		4	8.16327	0.999574		19	38.7755	0.0780007
hsa03010	Ribosome	130	15	11.5385	0.999868		19	14.6154	0.999936		31	23.8462	0.045233		0	0	1		0	0	1		0	0	1		0	0	1		0	0	1		21	16.1538	0.994298		20	15.3846	0.999887		11	8.46154	0.999994		12	9.23077	0.999999
hsa00780	Biotin metabolism	3	0	0	1		2	66.6667	0.236467		0	0	1		2	66.6667	0.0583902		0	0	1		0	0	1		0	0	1		0	0	1		0	0	1		1	33.3333	0.674263		0	0	1		2	66.6667	0.193996
hsa00785	Lipoic acid metabolism	4	0	0	1		3	75	0.0778224		1	25	0.537947		0	0	1		0	0	1		0	0	1		0	0	1		0	0	1		0	0	1		3	75	0.0793047		0	0	1		2	50	0.274384
hsa00400	Phenylalanine, tyrosine and tryptophan biosynthesis	3	0	0	1		1	33.3333	0.68214		0	0	1		0	0	1		0	0	1		0	0	1		1	33.3333	0.0464796		0	0	1		0	0	1		2	66.6667	0.233235		0	0	1		1	33.3333	0.631791
hsa00232	Caffeine metabolism	1	0	0	1		0	0	1		0	0	1		0	0	1		0	0	1		0	0	1		0	0	1		0	0	1		1	100	0.265758		0	0	1		0	0	1		0	0	1
hsa05168	Herpes simplex virus 1 infection	454	91	20.0441	0.999858		240	52.8634	2.80544e-20		64	14.0969	0.984658		174	38.326	7.95718e-36		17	3.74449	0.303978		7	1.54185	0.623153		12	2.64317	0.0204243		0	0	1		89	19.6035	0.999972		197	43.3921	2.98442e-08		91	20.0441	0.999158		231	50.8811	1.21459e-23
